# Supplementary material for: Lipocalin-2 is an anorexigenic signal in primates
Source: eLife. 2020 Nov 24;9:e58949. doi: 10.7554/eLife.58949 (PMC7685704; doi:10.7554/eLife.58949)
Supplement: Figure 1—figure supplement 1—source data 1. [file elife-58949-fig1-figsupp1-data1.xlsx]

## Sheet: Sheet1
1, A	LCN2 (raw values in ng/mL)
	Observation	ID	T0	T15	T30	T45	T60	T90	T120	T180
	1	AA-08	27.7693	32.17	49.2188	51.325	43.3755	36.9154	34.8064	27.7497
	2	EA-09	28.2226	27.9851	29.5896	30.2887	28.5025	31.2037	26.4203	28.5427
	3	MB-10	75.6571	89.4184	68.3762	74.8882	71.09	67.755	57.8354	52.2102
	4	SY-11	20.7335	18.3454	19.8754	19.6217	21.616	17.6132	21.7753	19.2137
	5	LT-12	18.5739	20.9253	28.6233	25.024	33.4742	35.2787	28.7651	23.4724
	6	S-K013	18.0944	19.2484	20.5216	18.2632	18.2803	20.4707	17.7971	20.4301
	7	N-A014	59.3091	75.5614	57.6086	78.2557	67.3962	65.5692	67.2541	72.2252
	8	G-T015	19.3133	20.9669	23.5334	27.255	31.3273	26.4559	32.5833	24.4041
	9	L-S016	28.7504	38.3943	29.8763	33.9875	35.6531	34.5208	28.0982	33.8556
	10	K-L017	36.1931	34.0443	43.0791	39.8315	38.5657	39.9647	37.737	29.1949
	11	R-K018	90.9506	76.4269	95.7129	91.7646	88.1181	81.3075	72.8531	75.7949
		mean	38.5061	41.226	42.365	44.5914	43.3999	41.5504	38.7205	37.0085
		SD	25.2648	26.2422	23.7655	25.8101	22.3549	20.7586	18.6727	20.3413
		SEM	7.61762	7.91233	7.16557	7.78203	6.74024	6.25896	5.63003	6.13312
		N	11	11	11	11	11	11	11	11
	Hunger
	Observation	ID	0	15	30	45	60	90	120	180
	1	AA-08	50	10	10	10	10	10	10	20
	2	EA-09	30	50	40	40	30	30	60	80
	3	MB-10	90	10	10	10	30	10	20	30
	4	SY-11	100	85	80	80	80	70	70	80
	5	LT-12	10	10	10	20	20	10	10	10
	6	S-K013	50	10	10	10	10	10	10	10
	7	N-A014	30	10	10	10	10	10	10	10
	8	G-T015	80	40	10	10	20	30	20	40
	9	L-S016	100	80	40	20	10	10	10	30
	10	K-L017	65	10	10	10	10	20	20	40
	11	R-K018	60	50	30	20	10	50	50	60
		mean	60.4545	33.1818	23.6364	21.8182	21.8182	23.6364	26.3636	37.2727
		SD	30.0379	29.5189	22.4823	21.3627	20.8893	20.1359	22.4823	26.1116
		SEM	9.05675	8.90027	6.77867	6.44109	6.29837	6.0712	6.77867	7.87296
		N	11	11	11	11	11	11	11	11
1, B	GLP-1 (raw values in ng/mL)
	Observation	ID	T0	T15	T30	T45	T60	T90	T120	T180
	1	AA-08	51.9245	142.112	129.316	91.9778	88.5954	75.962	56.5317	78.5134
	2	EA-09	61.3379	79.9004	87.4528	115.969	97.1433	121.098	99.5827	71.7534
	3	MB-10	44.3194	67.5208	63.9603	69.8787	93.1128	79.4387	73.1628	54.112
	4	SY-11	55.8058	69.8787	73.8642	72.2198	77.8183	78.2816	65.8631	70.3491
	5	LT-12	60.854	75.9612	108.601	91.7622	73.3974	84.2667	74.0962	69.4166
	6	G-T015	35.2076	43.1551	49.867	69.1928	59.0263	56.7425	53.0855	68.5195
	7	L-S016	missing sample	72.5488	77.2235	85.3715	79.8733	70.0795	72.3208	58.5711
	8	K-L017	53.992	73.4414	91.9341	87.3504	89.9683	74.7789	67.8455	66.9459
		mean	51.9202	78.0647	85.2774	85.4653	82.3669	80.081	70.311	67.2726
		SD	9.35396	28.1792	25.1734	15.5806	12.4358	18.4907	14.1208	7.66323
		SEM	3.53547	9.96284	8.90015	5.50856	4.3967	6.53744	4.99247	2.70936
		N	7	8	8	8	8	8	8	8
1, C	INSULIN (raw values in mIU/L)
	Observation	ID	T0	T15	T30	T45	T60	T90	T120	T180
	1	AA-08	2.56641	19.8712	8.59275	12.71	11.3523	28.3132	14.0174	5.62513
	2	EA-09	2.16893	2.3018	8.1323	8.59275	7.54916	3.99472	24.4138	8.36319
	3	MB-10	1.49877	4.75485	2.69814	5.12999	8.59275	5.87055	10.5997	2.56641
	4	SY-11	2.82949	16.5812	30.8052	16.3061	11.3523	32.1111	16.854	5.87055
	5	LT-12	0.406229	7.90006	13.4201	6.71838	3.48059	19.2075	30.2444	4.62908
	6	S-K013	0.681726	3.09106	2.56641	1.49877	1.36357	6.23602	23.1995	2.3018
	7	N-A014	2.69814	25.0355	15.6548	3.48059	5.74801	16.3061	4.88026	17.8346
	8	G-T015	1.63357	3.22128	1.63357	5.62513	4.50294	1.90202	3.09106	2.69814
	9	L-S016	0.544176	1.90202	8.59275	7.90006	12.0897	2.96046	17.3927	1.90202
	10	K-L017	1.76799	3.86675	7.31351	8.1323	4.50294	17.7467	17.3927	2.16893
	11	R-K018	0.934064	1.27074	2.10162	2.59281	2.42969	6.62721	2.26596	0.594886
		mean	1.61177	8.16332	9.22829	7.15335	6.63309	12.8432	14.9411	4.95952
		SD	0.885428	8.33051	8.51823	4.37169	3.79776	10.5532	9.10938	4.82519
		SEM	0.266966	2.51174	2.56834	1.31812	1.14507	3.18191	2.74658	1.45485
		N	11	11	11	11	11	11	11	11
1, D	LCN2 (raw values in ng/mL)		Y variable
	mean	38.5061	41.226	42.365	44.5914	43.3999	41.5504	38.7205	37.0085
	SEM	7.61762	7.91233	7.16557	7.78203	6.74024	6.25896	5.63003	6.13312
	N	11	11	11	11	11	11	11	11
	Hunger		X variable
	mean	60.4545	33.1818	23.6364	21.8182	21.8182	23.6364	26.3636	37.2727
	SEM	9.05675	8.90027	6.77867	6.44109	6.29837	6.0712	6.77867	7.87296
	N	11	11	11	11	11	11	11	11
	Spearman r=-0.94
	P (two-tailed)= 0.001
	Number of XY pairs=8
1, E	GLP-1 (raw values in ng/mL)		Y variable
	mean	51.9202	78.0647	85.2774	85.4653	82.3669	80.081	70.311	67.2726
	SEM	3.53547	9.96284	8.90015	5.50856	4.3967	6.53744	4.99247	2.70936
	N	7	8	8	8	8	8	8	8
	Hunger		X variable
	mean	60.4545	33.1818	23.6364	21.8182	21.8182	23.6364	26.3636	37.2727
	SEM	9.05675	8.90027	6.77867	6.44109	6.29837	6.0712	6.77867	7.87296
	N	11	11	11	11	11	11	11	11
	Spearman r=-0.83
	P (two-tailed)= 0.02
	Number of XY pairs=8
1, F	insulin (raw values in ng/mL)		Y variable
	mean	1.61177	8.16332	9.22829	7.15335	6.63309	12.8432	14.9411	4.95952
	SEM	0.266966	2.51174	2.56834	1.31812	1.14507	3.18191	2.74658	1.45485
	N	11	11	11	11	11	11	11	11
	Hunger		X variable
	mean	60.4545	33.1818	23.6364	21.8182	21.8182	23.6364	26.3636	37.2727
	SEM	9.05675	8.90027	6.77867	6.44109	6.29837	6.0712	6.77867	7.87296
	N	11	11	11	11	11	11	11	11
	Spearman r=-0.34
	P (two-tailed)= 0.41
	Number of XY pairs=8
1, G	LCN2 (raw values in ng/mL)
	Observation	ID	T0	T60	T105
	1	BJ	86.8	124.92	116.68
	2	PM	56.28	72.38	61.94
	3	LM	54.42	74.52	68.52
	4	RA	118.24	200	179.08
	5	BM	87.68	113.48	84.16
	6	BC	80.7	119.12	120.96
	7	LE	92.68	163.96	151.72
	8	BE	27.86	35.54	30.04
	9	SM	65.22	127.04	125.12
		mean	74.4311	114.551	104.247
		SD	26.4662	49.563	47.0368
		SEM	8.82207	16.521	15.6789
		N	9	9	9
1, H	GLP-1 (raw values in ng/mL)
	Observation	ID	T0	T60	T105
	1	BJ	13.126	16.0613	9.7291
	2	PM	22.1955	26.1861	17.2815
	3	LM	9.79506	24.4712	20.7114
	4	RA	6.596	17.5783	18.6997
	5	BM	13.8846	13.0271	14.3793
	6	BC	5.1119	8.14606	4.08952
	7	LE	4.74912	23.4488	14.9399
	8	BE	12.8622	13.0931	7.5854
	9	SM	18.7326	20.0518	25.7244
		mean	11.8948	18.0071	14.7934
		SD	6.00861	6.04805	6.78535
		SEM	2.00287	2.01602	2.26178
		N	9	9	9
1, I	INSULIN (raw values in mIU/L)
	Observation	ID	T0	T60	T105
	1	BJ	8.7	26.4	missing sample
	2	PM	2.4	34.5	35
	3	LM	12.1	87	39.4
	4	RA	10	86.4	53.5
	5	BM	7.6	49.6	29.5
	6	BC	7.6	45.8	18.4
	7	LE	6.2	71	27.8
	8	BE	21.6	176.4	65.9
	9	SM	3.9	11.4	6.4
		mean	8.9	65.3889	34.4875
		SD	5.59799	49.0988	18.8601
		SEM	1.866	16.3663	6.66806
		N	9	9	8
