# Supplementary material for: Lipocalin-2 is an anorexigenic signal in primates
Source: eLife. 2020 Nov 24;9:e58949. doi: 10.7554/eLife.58949 (PMC7685704; doi:10.7554/eLife.58949)
Supplement: Figure 1—figure supplement 2—source data 1. [file elife-58949-fig1-figsupp2-data1.xlsx]

## Sheet: Sheet1
	2 A-C	LCN2 (raw values in ng/mL)									2 ,G-I	GLP-1 (raw values in ng/mL)									2, M-O	Insulin (raw values in ng/mL)
	RESPONSE	SEX	Subj. #	T0	T30	T60	T90	T120	T180		RESPONSE	SEX	Subj. #	T0	T30	T60	T90	T120	T180		RESPONSE	SEX	Subj. #	T0	T30	T60	T90	T120	T180
	R	female	1	11.737	11.1543	12.2396	10.1538	10.3998	15.9576		R	female	1	77.8912	77.8912	82.3878	81.8644	92.6551	103.948		R	female	1	29.6	90.149	67.092	22.615	14.315	9.21
	R	female	6	19.1995	18.6271	27.6856	23.534	16.8245	29.0523		R	female	6	61.3837	102.606	107.774	85.0692	112.836	112.836		R	female	6	14.44	48.611	27.386	12.119	10.6169	23.064
	R	female	8	24.4238	28.575	24.5855	26.2196	24.9638	missing sample		R	female	8	83.5852	91.8278	117.945	110.419	96.4906	99.0199		R	female	8	30.363	128.551	71.149	29.987	21.3985	21.3985
	R	female	9	21.597	22.6472	21.5576	20.7045	23.009	23.5503		R	female	9	19.1209	35.5547	36.1727	49.7828	57.9174	73.6246		R	female	9	17.653	98.381	76.244	69.236	32.0179	17.6644
	R	female	13	34.1331	36.9094	30.5815	27.3036	34.4501	41.2692		R	female	13	64.6334	83.1902	106.654	114.172	145.442	122.212		R	female	13	14.691	37.832	50.637	30.852	19.8857	15.3013
	R	female	14	48.3685	85.1955	69.4531	48.7868	46.0817	missing sample		R	female	14	150.827	171.949	171.949	182.377	155.592	155.592		R	female	14	26.74	105.775	69.538	70.892	41.4594	12.0268
	R	female	15	34.6214	35.8093	34.3129	33.2704	35.6686	33.1226		R	female	15	99.4571	231.4	106.423	150.848	185.386	139.633		R	female	15	9.616	45.521	34.283	13.97	11.5695	11.726
	R	female	20	51.5049	41.9443	61.1482	59.8561	45.5157	48.057		R	female	20	56.2582	75.5593	100.677	111.013	98.7095	71.4873		R	female	20	11.128	61.846	23.38	22.74	15.0397	11.6001
	R	female	25	34.9102	32.2871	39.3477	33.8663	36.2973	44.2061		R	female	25	70.8315	115.493	123.807	128.303	108.293	82.2793		R	female	25	8.972	169.338	14.414	9.27	9.83614	8.5526
	R	female	31	36.6576	37.6316	42.9126	33.2893	33.5312	42.0102		R	female	31	83.5749	92.3233	111.807	85.3286	70.1678	63.4359		R	female	31	11.421	missing	18.841	20.044	16.782	16.992
	R	female	32	31.3734	23.9506	22.5979	35.9932	26.6438	36.032		R	female	32	32.3193	56.1181	94.524	149.9	79.3937	96.4246		R	female	32	17.851	79.187	26.1	28.921	22.6014	20.375
	R	female	33	25.6118	31.3995	36.8291	32.7731	29.2022	30.1958		R	female	33	80.5014	123.466	119.708	133.169	79.3937	97.4112		R	female	33	8.564	43.964	10.77	10.829	9.063	8.589
	R	female	35	27.888	34.8288	22.2926	20.6189	28.8388	29.521		R	female	35	83.2456	117.075	103.75	110.606	114.775	126.666		R	female	35	31.156	144.468	131.703	110.547	93.013	20.2732
	R	female	43	26.3881	24.9748	30.9184	31.0428	30.9085	33.3378		R	female	43	57.6397	70.2655	103.425	144.552	97.3345	134.211		R	female	43	16.839	34.776	16.15	24.718	18.4142	9.79864
	R	female	48	67.0542	65.5682	67.9899	78.8944	75.5154	70.4362		R	female	48	63.2326	74.6483	86.5864	76.5199	76.0081	74.9757		R	female	48	15.764	120.724	49.492	20.077	22.557	15.399
			mean	33.0312	35.4335	36.2968	34.4205	33.19	36.6729				mean	72.3001	101.291	104.906	114.262	104.693	103.584				mean	17.6532	86.3659	45.8119	33.1211	23.9046	14.798
			sem	3.37421	4.46474	4.19888	4.1103	3.63347	3.43908				sem	7.72685	12.4607	7.23698	9.01853	8.9252	7.18133				sem	2.06619	11.559	8.50298	7.32312	5.42229	1.28682
			%change		0	2.43638	-2.85906	-6.33161	3.49782				%change		0	3.56889	12.8052	3.35851	2.26339				%change		0	-46.956	-61.6502	-72.3217	-82.8659
	R	male	24	113.43	122.007	128.061	111.581	131.044	106.754		R	male	24	60.7842	76.6807	78.2813	80.2556	64.0573	70.1547		R	male	24	14.461	74.497	41.998	16.444	65.354	16.4886
	R	male	29	26.1694	29.4991	26.1085	28.1499	21.5353	19.9044		R	male	29	45.4259	52.6228	50.0371	61.7234	70.482	73.8803		R	male	29	12.918	43.332	32.463	25.351	12.1722	11.7782
	R	male	34	27.413	30.0915	27.0742	28.1202	26.993	29.4562		R	male	34	63.4105	69.4209	79.4605	91.2981	96.0021	58.392		R	male	34	13.716	102.165	58.466	20.516	22.533	13.003
	R	male	36	29.8982	25.9547	27.428	33.3593	31.9719	34.5923		R	male	36	134.367	156.04	146.87	154.286	136.706	133.531		R	male	36	24	138.295	108.511	33.775	24.812	21.0502
	R	male	39	25.9262	32.1052	31.2596	26.2593	27.1466			R	male	39	123.616	121.47	110.188	112.822	115.57	105.704		R	male	39	12.374	63.241	59.787	14.79	15.437	12.568
	R	male	41	48.7014	42.5523	67.1435	39.423	34.0961	37.7732		R	male	41	93.6573	98.4493	92.8214	97.8489	112.626	124.432		R	male	41	20.008	53.616	41.666	21.649	19.931	15.0135
	R	male	42	22.2623	24.9118	32.7946	27.1569	35.7134	28.2471		R	male	42	90.7732	84.7182	88.9876	87.8129	84.7182	93.0751		R	male	42	12.918	32.371	27.273	12.931	12.8903	13.8903
	R	male	44	18.3762	13.7178	15.0353	14.309	21.742	23.7536		R	male	44	137	155	137	189	180	183		R	male	44	15.812	83.741	42.267	17.979	20.2663	15.764
	R	male	45	23.4702	24.4831	30.2143	24.5856	27.2474	17.2254		R	male	45	86.183	83.1424	102.823	129.013	114.819	109.181		R	male	45	22.503	59.122	30.953	14.443	14.266	11.599
	R	male	47	35.5899	51.5119	41.5355	42.999	45.3287	39.3355		R	male	47	97.7302	129.513	138.893	142.98	130.744	122.836		R	male	47	12.507	93.688	24.037	14.9856	23.0927	16.1134
			mean	37.1236	39.6834	42.6654	37.5943	40.2819	37.4491				mean	93.2947	102.706	102.536	114.704	110.572	107.419				mean	16.1217	74.4068	46.7421	19.2864	23.0755	14.7268
			sem	8.88797	9.71275	10.4287	8.59739	10.331	9.02774				sem	9.90768	11.3861	9.82542	12.3122	10.8571	11.5712				sem	1.39113	9.90753	7.84508	2.017	4.90706	0.900491
			%change		0	7.51445	-5.26438	1.50804	-5.63028				%change		0	-0.165231	11.6821	7.65936	4.58879				%change		0	-37.1803	-74.0798	-68.9874	-80.2077
		mixed R	mean	34.6682	37.1335	38.8443	35.69	36.0267	36.9905			mixed R	mean	80.698	101.857	103.958	114.439	107.045	105.118			mixed R	mean	17.0406	81.383	46.184	27.5872	23.573	14.7696
			sem	4.07075	4.7228	4.8756	4.23625	4.66832	4.16743				sem	6.32681	8.59132	5.73305	7.15593	6.77553	6.18717				sem	1.3446	7.84655	5.87756	4.61455	3.7295	0.837406
			%change		0	4.60709	-3.88726	-2.98041	-0.385146				%change		0	2.0628	12.3522	5.09319	3.2013				%change		0	-43.251	-66.102	-71.0345	-81.8518
	NR	female	2	57.1381	25.5714	39.7511	45.4307	43.7057	25.7954		NR	female	2	140.435	162.544	136.545	180.945	122.456	128.331		NR	female	2	16.904	186.309	32.836	17.634	13.6846	22.7854
	NR	female	4	13.2749	13.64	12.4876	12.4169	12.7193	14.2141		NR	female	4	66.6861	58.285	53.924	44.3596	50.3094	62.0202		NR	female	4	35.721	93.45	78.671	47.414	31.7172	39.8768
	NR	female	5	37.239	30.1855	33.6013	21.8094	23.8304	40.4026		NR	female	5	38.29	51.43	49	38.65	32.44	50.42		NR	female	5	12.46	92.584	158.897	90.732	23.3121	14.9094
	NR	female	7	22.4522	24.399	16.0121	20.6586	22.1095	19.425		NR	female	7	52.6468	74.0613	78.5748	83.5852	85.2233	62.9666		NR	female	7	13.119	61.112	31.073	16.742	13.7235	13.3505
	NR	female	10	40.7557	20.5723	25.638	25.1195	25.7622	31.1414		NR	female	10	74.2225	118.121	138.849	114.402	131.078	123.46		NR	female	10	15.261	123.041	175.425	30.906	23.5242	23.8124
	NR	female	11	52.6418	44.7889	44.7022	49.1234	46.0348	37.6362		NR	female	11	97.958	110.452	104.886	124.919	132.485	124.919		NR	female	11	17.476	212.321	90.71	29.26	37.863	17.5378
	NR	female	18	45.4474	39.2389	39.161	36.5479	43.6214	30.0601		NR	female	18	60.1814	53.691	75.5616	72.7604	62.9953	72.1543		NR	female	18	12.706	missing	19.72	16.056	11.942	8.79937
	NR	female	23	69.8812	55.5394	55.8948	45.3622	49.5696	63.4907		NR	female	23	missing sample	missing sample	missing sample	missing sample	missing sample	missing sample		NR	female	23	7.882	77.558	32.196	8.25	7.17798	11.0042
	NR	female	30	46.1562	35.5945	38.4671	38.981	41.6379	40.3826		NR	female	28	53.42	114.37	98.3	98.44	100.55	64.27		NR	female	28	14.417	141.934	63.566	15.508	12.741	9.365
	NR	female	37	27.8101	25.8382	23.4288	23.2026	26.0793	33.4319		NR	female	30	50.8596	103.383	136.992	158.862	127.156	93.7939		NR	female	30	11.969	44.923	32.53	17.744	10.6761	10.1712
	NR	female	46	30.9724	26.3998	25.5206	32.3995	29.7634	30.8708		NR	female	37	54.8701	98.6215	102.876	105.314	114.114	90.3602		NR	female	37	16.451	81.085	26.872	13.432	13.7629	13.3185
	NR	female	50	37.7901	30.7859	28.1912	30.7758	31.6832	46.2302		NR	female	46	97.026	87.6875	112.791	94.8557	89.8192	100.804		NR	female	46	21.748	90.242	51.746	38.057	16.956	12.625
	NR	female	28	30.2578	32.5942	16.8298	27.0416	18.1248	30.2136		NR	female	50	69.7713	105.31	145.679	123.825	115.088	96.5434		NR	female	50	21.672	64.593	50.802	27.731	18.443	21.071
			mean	39.3705	31.1652	30.745	31.4515	31.8955	34.0996				mean	71.3639	94.8297	102.831	103.41	96.9762	89.1702				mean	16.7528	105.763	65.0034	28.4205	18.1172	16.8174
			sem	4.21313	3.01189	3.49404	3.08491	3.28008	3.42828				sem	8.14306	9.27067	9.60682	12.0609	9.65509	7.80184				sem	1.90621	14.7736	13.8808	6.02428	2.44493	2.37261
			%change		0	-1.34823	0.918499	2.34324	9.41548				%change		0	8.43805	9.04792	2.26353	-5.96809				%change		0	-63.1017	-119.738	-135.689	-137.701
	NR	male	3	28.3438	20.0885	28.6505	25.3774	25.8242	26.4851		NR	male	3	45.2548	43.1979	45.7063	47.2717	53.5329	87.2051		NR	male	3	9.432	47.249	43.156	17.601	11.858	15.424
	NR	male	17	41.7506	35.586	35.8807	33.8015	37.4141	37.9488		NR	male	16	66.5969	92.0953	102.529	85.6079	73.766	71.3426		NR	male	16	12.523	63.03	22.445	13.345	13.996	13.5219
	NR	male	38	35.3535	26.0529	22.8077	25.0317	25.9326	24.3091		NR	male	17	38.3702	36.3643	37.1722	49.2534	50.2013	41.1064		NR	male	17	12.641	33.331	14.987	14.322	16.4438	6.52447
	NR	male	40	20.4206	21.4583	20.6399	19.3517	19.2418	21.5203		NR	male	26	74.672	94.005	86.9784	89.6819	91.6222	94.6429		NR	male	26	29	271.847	216.978	63.842	32.984	28.5259
	NR	male	49	48.1817	40.3529	40.243	46.612	48.826	48.5721		NR	male	27	130.878	118.027	101.57	88.9255	106.635	98.5314		NR	male	27	15.397	31.582	53.128	12.934	7.645	16.4886
	NR	male	51	39.5254	26.8966	29.3284	32.263	38.4162	38.4427		NR	male	38	134.311	172.75	141.43	159.219	179.672	162.935		NR	male	38	12.933	152.826	65.16	24.417	14.0364	12.5086
	NR	male	16	29.7547	20.8411	25.3699	22.0386	32.2508	23.0087		NR	male	40	39.3137	46.6738	60.2135	47.1806	115.874	48.5169		NR	male	40	9.973	31.708	54.177	16.939	13.775	9.732
	NR	male	26	45.8456	49.9374	39.349	39.877	29.55	35.5493		NR	male	49	108.64	108.545	88.8835	88.8835	99.4998	99.7935		NR	male	49	26.02	142.238	42.825	18.347	19.261	41.486
	NR	male	27	26.9808	25.8598	28.8924	22.6724	18.6586	20.6814		NR	male	51	109.866	113.977	100.282	87.2372	104.734	111.555		NR	male	51	11.503	30.117	26.697	20.008	18.2117	14.1516
			mean	35.1285	29.6748	30.1291	29.6695	30.6794	30.7242				mean	83.1002	91.7372	84.974	82.5845	97.2819	90.6254				mean	15.4913	89.3253	59.9503	22.4172	16.4679	17.5959
			sem	3.13159	3.4001	2.33046	3.04735	3.24825	3.24427				sem	12.8925	14.6674	10.8427	11.5742	12.9085	12.0405				sem	2.35673	27.8645	20.3696	5.31423	2.36289	3.60344
			%change		0	1.53073	-0.0180325	3.38514	3.53614				%change		0	-7.37233	-9.97703	6.04415	-1.21191				%change		0	-32.8854	-74.9038	-81.5642	-80.3013
												mixed NR	mean	76.3937	93.5043	95.1783	94.4847	97.1072	89.7938			mixed NR	mean	16.2367	98.7181	62.9362	25.9646	17.4425	17.1359
		mixed NR	mean	37.6352	30.5555	30.4931	30.7225	31.398	32.7187				sem	7.1429	8.00051	7.28453	8.60194	7.60684	6.63392				sem	1.45287	14.318	11.4025	4.13164	1.70876	1.98277
			sem	2.78014	2.21141	2.23003	2.1673	2.30092	2.39584				%change		0	1.79023	1.04846	3.85317	-3.96825				%change		0	-36.2465	-73.6982	-82.331	-82.6416
			%change		0	-0.204421	0.546415	2.75719	7.07962			whole cohort	Mean	78.733	98.0438	99.9499	105.329	102.508	98.122
													STD	31.8529	39.9906	30.8716	38.3973	34.3106	31.3164				Mean	16.6643	89.4727	54.0255	26.8277	20.7034	15.8772
		whole cohort:	Mean	36.057	34.0544	34.9352	33.3648	33.8601	34.8546				SEM	4.69646	5.89629	4.55177	5.66137	5.05882	4.61736				STD	6.70422	52.9696	42.7528	21.21	14.8429	7.07501
			STD	17.205	18.7365	19.4358	16.9567	18.5171	15.9041				N	46	46	46	46	46	46				SEM	0.97791	7.89624	6.23614	3.0938	2.16505	1.032
			SEM	2.5096	2.733	2.83501	2.47339	2.70099	2.39763														N	47	45	47	47	47	47
			N	47	47	47	47	47	44
	2, D	Correlation between raw LCN2 and hunger (mixed R)									2, J	Correlation between raw GLP-1 and hunger (mixed R)									2, P	Correlation between raw insulin and hunger (mixed R)
		LCN2 raw values in ng/mL					Y variable					GLP-1 raw values in ng/mL					Y variable					Insulin raw values in mIU/L					Y variable
			T0	T30	T60	T90	T120	T180					T0	T30	T60	T90	T120	T180					T0	T30	T60	T90	T120	T180
		Mean	34.6682	37.1335	38.8443	35.69	36.0267	36.9905				Mean	80.7	101.9	103.95	114.44	107.04	105.12				Mean	17.04	81.384	46.184	27.588	23.573	14.769
		SEM	4.07075	4.7228	4.8756	4.23625	4.66832	4.16743				SEM	6.11096	8.27225	5.5186	6.91633	6.54335	5.94676				SEM	1.345	7.847	5.878	4.615	3.729	0.837
		N	25	25	25	25	25	25				N	25	25	25	25	25	25				N	25	24	25	25	25	25
		Hunger	X variable									Hunger	X variable									Hunger	X variable
			T0	T30	T60	T90	T120	T180					T0	T30	T60	T90	T120	T180					T0	T30	T60	T90	T120	T180
		Mean	66	29.8	36.7	40.2	46.2	61.3				Mean	66.8	29.2	36	40.9	47	61.6				Mean	66.8	29.2	36	40.9	47	61.6
		SEM	2.9	4.3	4.1	4.3	4.7	3.9				SEM	2.9	4.2	4	4.1	4.6	3.8				SEM	2.9	4.2	4	4.1	4.6	3.8
		N	25	25	25	25	25	25				N	25	25	25	25	25	25				N	25	25	25	25	25	25
		Spearman r=-0.71										Spearman r=-0.09										Spearman r=-0.94
		P(two-tailed)=0.14										P(two-tailed)=0.92										P(two-tailed)=0.02
		Number XY pairs=6										Number XY pairs=6										Number XY pairs=6
	2, E	Correlation between raw LCN2 and hunger (Female R)									2, K	Correlation between raw GLP-1 and hunger (Female R)									2, Q	Correlation between raw insulin and hunger (Female R)
		LCN2 raw values in ng/mL					Y variable					GLP-1 raw values in ng/mL					Y variable					Insulin raw values in mIU/L					Y variable
			T0	T30	T60	T90	T120	T180					T0	T30	T60	T90	T120	T180					T0	T30	T60	T90	T120	T180
		Mean	33.0312	35.4335	36.2968	34.4205	33.19	36.6729				Mean	72.3	101.291	104.907	114.261	104.693	103.584				Mean	17.6527	86.3664	45.8113	33.122	23.9053	14.798
		SEM	3.37421	4.46474	4.19888	4.1103	3.63347	3.43908				SEM	7.7271	12.4608	7.23717	9.01875	8.92528	7.1811				SEM	2.06629	11.5591	8.50286	7.32325	5.42205	1.28664
		N	15	15	15	15	15	15				N	15	15	15	15	15	15				N	15	14	15	15	15	15
		Hunger	X variable									Hunger	X variable									Hunger	X variable
			T0	T30	T60	T90	T120	T180					T0	T30	T60	T90	T120	T180					T0	T30	T60	T90	T120	T180
		Mean	67.3	24.4	30.5	35.7	40.6	62.5				Mean	68.56	23.81	29.67	37.08	42.29	62.85				Mean	68.56	23.81	29.67	37.08	42.29	62.85
		SEM	4	5.5	5.5	5.5	6.6	5.1				SEM	3.9	5.2	5.2	5.3	6.4	4.8				SEM	3.9	5.2	5.2	5.3	6.4	4.8
		N	15	15	15	15	15	15				N	15	15	15	15	15	15				N	15	14	15	15	15	15
		Spearman r=-0.37										Spearman r=-0.37										Spearman r=-0.94
		P(two-tailed)=0.5										P(two-tailed)=0.5										P(two-tailed)=0.02
		Number XY pairs=6										Number XY pairs=6										Number XY pairs=6
	2, F	Correlation between raw LCN2 and hunger (Male R)									2, L	Correlation between raw GLP-1 and hunger (Male R)									2, R	Correlation between raw insulin and hunger (Male R)
		LCN2 raw values in ng/mL					Y variable					GLP-1 raw values in ng/mL					Y variable					Insulin raw values in mIU/L					Y variable
			T0	T30	T60	T90	T120	T180					T0	T30	T60	T90	T120	T180					T0	T30	T60	T90	T120	T180
		Mean	37.1236	39.6834	42.6654	37.5943	40.2819	37.4491				Mean	93.295	102.705	102.536	114.704	110.573	107.418				Mean	16.1217	74.4068	46.7421	19.2864	23.0755	14.7268
		SEM	8.88797	9.71275	10.4287	8.59739	10.331	9.02774				SEM	9.90796	11.3862	9.82521	12.3124	10.8571	11.5714				SEM	1.39113	9.90753	7.84508	2.017	4.90706	0.900491
		N	10	10	10	10	10	9				N	10	10	10	10	10	10				N	10	10	10	10	10	10
		Hunger	X variable									Hunger	X variable									Hunger	X variable
			T0	T30	T60	T90	T120	T180					T0	T30	T60	T90	T120	T180					T0	T30	T60	T90	T120	T180
		Mean	64	37.9	46.2	47.1	54.6	59.5				Mean	64	37.9	46.2	47.1	54.6	59.5				Mean	64	37.9	46.2	47.1	54.6	59.5
		SEM	4.2	6.5	5.2	6.5	6	6.4				SEM	4.2	6.5	5.2	6.5	6	6.4				SEM	4.2	6.5	5.2	6.5	6	6.4
		N	10	10	10	10	10	10				N	10	10	10	10	10	10				N	10	10	10	10	10	10
		Spearman r=-0.71										Spearman r=-0.14										Spearman r=-0.14
		P(two-tailed)=0.14										P(two-tailed)=0.80										P(two-tailed)=0.80
		Number XY pairs=6										Number XY pairs=6										Number XY pairs=6
