# Supplementary material for: Lipocalin-2 is an anorexigenic signal in primates
Source: eLife. 2020 Nov 24;9:e58949. doi: 10.7554/eLife.58949 (PMC7685704; doi:10.7554/eLife.58949)
Supplement: Figure 1—figure supplement 3—source data 1. [file elife-58949-fig1-figsupp3-data1.xlsx]

## Sheet: Sheet1
	3, A	LCN2 (raw values in ng/mL)
		Pre or Post surgery	Subj. #	T0	T15	T30	T45	T60	T90	T120	T180	T240	T300	T360
		Pre	2707	80.8173	71.1591	63.3141	57.338	38.3298	34.5086	25.4241	28.2566	33.1048	38.0332	36.6754
		Pre	2710	50.0679	92.7267	52.8095	74.179	48.9556	33.8068	43.3171	38.4387	55.2189	74.8608	56.954
		Pre	2716	52.6907	59.0741	39.691	35.7294	55.8849	46.7266	56.4427	47.6715	29.8601	55.0722	63.6934
		Pre	2717	39.4822	50.0586	41.1398	63.3025	43.0085	36.2936	33.1961	39.9567	40.2024	24.274	40.2608
		Pre	2718	121.452	89.7808	134.114	63.7926	100.176	115.021	121.31	138.088	178.732	112.738	120.278
		Pre	2720	104.978	96.0163	95.5349	76.1294	68.4228	59.1029	60.9286	85.6664	195.462	60.4535	74.389
		Pre	2701	36.2188	34.5107	38.4615	42.2966	42.9731	37.3546	34.2432	48.6797	37.1846	43.3823	41.6216
		Pre	2719	43.6305	40.331	44.595	32.4557	33.1396	32.1059	33.9772	32.6947	35.7547	34.894	37.7993
		Pre	2721	46.8097	47.4722	52.0741	54.6312	49.1633	51.8991	39.8218	36.6805	38.6152	39.4057	42.2461
		Pre	2723	64.9709	63.3498	62.1331	63.2427	63.783	54.6124	61.9471	65.8196	79.2758	65.7766	65.8856
		Pre	2725	60.8613	63.5125	66.3657	63.913	59.3294	56.7921	63.8115	54.1903	55.1286	45.4685	45.9929
		Pre	2727	35.0586	34.9888	28.1649	27.631	44.6756	35.5055	37.0052	38.15	35.4124	37.6405	37.8936
			Mean	61.4198	61.915	59.8665	54.5534	53.9868	49.4774	50.952	54.5244	67.8293	52.6666	55.3075
			STD	27.6941	21.9047	29.2464	16.2401	17.9057	22.9015	25.7207	30.7268	57.4643	23.7702	24.1176
			SEM	7.99459	6.32333	8.44271	4.68812	5.16894	6.6111	7.42493	8.87007	16.5885	6.86188	6.96216
			N	12	12	12	12	12	12	12	12	12	12	12
	3, B	Correlation raw LCN2 (PRE) and hunger
		raw LCN2		Y variable
			T0	T15	T30	T60	T120	T180	T240	T300	T360
		Mean	61.4198	61.915	59.8665	53.9868	50.952	54.5244	67.8293	52.6666	55.3075
		SEM	7.99459	6.32333	8.44271	5.16894	7.42493	8.87007	16.5885	6.86188	6.96216
		N	12	12	12	12	12	12	12	12	12
		Hunger	X variable
			T0	T15	T30	T60	T120	T180	T240	T300	T360
		Mean	65.36	19.18	11.77	30	35.82	38	54	65.1	81.91
		SEM	12.87	7.87	4.5	9.6	9.61	9.62	13.25	12.99	13.21
		N	12	12	12	12	12	12	12	12	12
		Spearman r=-0.05
		P(two-tailed)=0.91
		Number XY pairs=9
	3, C	LCN2 (raw values in ng/mL)
		Pre or Post surgery	Subj. #	T0	T15	T30	T45	T60	T90	T120	T180	T240	T300	T360
		Post	2707	27.675	31.2167	38.406	20.1044	24.578	29.7016	25.3894	37.1485	30.1496	23.7864	31.9672
		Post	2710	46.1454	91.8549	36.5618	50.9483	74.0462	90.632	39.5081	74.2153	98.5791	42.6714	45.0753
		Post	2716	34.7025	31.7853	45.4102	55.3443	58.0764	68.3722	31.5216	44.2885	64.1357	57.8684	26.1009
		Post	2717	20.5441	44.8249	49.2219	43.5823	65.1311	69.7597	42.7852	47.2774	74.3985	65.3072	77.9795
		Post	2718	77.5803	94.1485	93.3332	96.2944	199.388	288.559	70.7756	86.8489	68.9495	95.9994	68.8799
		Post	2720	54.9487	74.1263	62.6788	47.2331	67.3434	76.9783	74.4942	63.5704	62.2483	76.675	52.2192
		Post	2701	44.6485	missing s.	missing s.	51.7069	49.8784	43.8195	54.2158	49.9263	49.114	44.5234	52.7658
		Post	2719	42.9611	48.4518	43.6001	39.5544	36.4759	39.7973	38.9707	36.9926	40.5678	39.3348	48.841
		Post	2721	64.1781	57.1662	66.911	54.0148	45.2574	50.9757	52.2122	47.2387	50.8023	51.3856	53.8198
		Post	2723	68.7275	75.0581	83.561	77.7024	73.4308	60.8184	66.5309	65.8343	67.9119	65.881	74.9269
		Post	2725	42.9789	111.506	34.5688	34.9735	34.7651	37.1021	36.5319	34.8122	43.987	35.4683	45.9929
		Post	2727	40.3348	45.9002	42.6746	43.5976	42.238	43.6854	44.3757	38.5903	48.9426	42.7823	34.929
			Mean	47.1188	64.1854	54.2661	51.2547	64.2174	75.0168	48.1093	52.2286	58.3155	53.4736	51.1248
			STD	16.7145	26.9488	19.7991	19.6762	45.4846	69.6653	15.7496	16.6852	18.2829	19.9566	16.3423
			SEM	4.82505	8.12536	5.96967	5.68003	13.1303	20.1106	4.54653	4.81662	5.27782	5.76098	4.71761
			N	12	11	11	12	12	12	12	12	12	12	12
	3, D	Correlation between raw LCN2 (POST) and hunger
		raw LCN2 values in ng/mL			Y variable
			T0	T15	T60	T120	T180	T240	T300	T360
		Mean	47.1188	64.1854	64.2174	48.1093	52.2286	58.3155	53.4736	51.1248
		SEM	4.82505	8.12536	13.1303	4.54653	4.81662	5.27782	5.76098	4.71761
		N	12	11	12	12	12	12	12	12
		Hunger	X variable
			T0	T15	T60	T120	T180	T240	T300	T360
		Mean	67	14.16	26.33	30.25	52.41	49	58.58	69.64
		SEM	16.76	11.11	13.66	13.91	16	16.61	16.74	17.4
		N	12	12	12	12	12	12	12	12
		Spearman r=-0.67
		P(two-tailed)=0.08
		Number XY pairs=8
	3, E	GLP-1 (raw values in ng/mL)
		Pre or Post surgery	Subj. #	T0	T15	T30	T45	T60	T90	T120	T180	T240	T300	T360
		Pre	2707	14.7443	33.8218	25.3518	15.8133	21.6588	22.5085	21.806	18.4952	22.3925	13.5305	12.5802
		Pre	2710	5.72333	6.01	17.6582	16.0628	14.084	8.8955	9.17933	11.0767	9.65533	9.93567	5.92833
		Pre	2716	5.21	12.0687	20.477	21.7165	14.5227	14.9738	17.7322	12.1187	10.9747	6.27233	5.77667
		Pre	2717	11.4487	14.0917	19.088	15.7728	19.4217	21.2533	15.9028	11.8593	10.2437	11.4757	8.13633
		Pre	2718	7.80867	26.7755	33.1427	24.2968	13.4483	15.512	14.1413	12.0097	8.537	9.46317	6.19633
		Pre	2720	5.72383	5.66767	12.8902	16.9853	16.49	13.445	13.275	11.774	9.76667	7.136	5.208
		Pre	2701	9.324	12.5428	14.0462	22.7625	23.4302	15.7153	12.7953	5.97933	5.65117	4.65383	4.28483
		Pre	2719	8.12833	16.3758	13.8678	13.7227	15.3573	14.8442	16.5148	15.4888	10.9927	10.9015	11.5917
		Pre	2721	5.208	5.208	5.54117	6.7655	5.208	6.98117	5.208	5.208	5.208	5.208	5.208
		Pre	2723	5.208	8.94367	23.2043	29.7377	11.7898	9.88367	7.644	6.63583	12.3157	8.60767	5.90967
		Pre	2725	5.208	5.208	6.07833	5.208	5.208	5.208	5.208	5.208	5.208	5.798	5.208
		Pre	2727	5.208	5.208	10.4495	6.51783	11.0877	5.73667	5.208	5.208	5.208	5.208	5.208
			Mean	7.41193	12.6601	16.8163	16.2802	14.3089	12.9131	12.0512	10.0885	9.67944	8.18253	6.76967
			STD	3.08021	9.22849	8.05793	7.58546	5.66029	5.68789	5.53311	4.41964	4.76554	2.89686	2.65558
			SEM	0.889181	2.66403	2.32612	2.18973	1.63398	1.64195	1.59727	1.27584	1.37569	0.836252	0.7666
			N	12	12	12	12	12	12	12	12	12	12	12
	3, F	Correlation raw GLP-1 (PRE) and hunger
		raw GLP-1		Y variable
			T0	T15	T30	T60	T120	T180	T240	T300	T360
		Mean	7.41193	12.6601	16.8163	14.3089	12.0512	10.0885	9.67944	8.18253	6.76967
		SEM	0.889181	2.66403	2.32612	1.63398	1.59727	1.27584	1.37569	0.836252	0.7666
		N	12	12	12	12	12	12	12	12	12
		Hunger	X variable
			T0	T15	T30	T60	T120	T180	T240	T300	T360
		Mean	65.36	19.18	11.77	30	35.82	38	54	65.1	81.91
		SEM	12.87	7.87	4.5	9.6	9.61	9.62	13.25	12.99	13.21
		N	12	12	12	12	12	12	12	12	12
		Spearman r=-0.95
		P(two-tailed)=0.0004
		Number XY pairs=9
	3, G	GLP-1 (raw values in ng/mL)
		Pre or Post surgery	Subj. #	T0	T15	T30	T45	T60	T90	T120	T180	T240	T300	T360
		Post	2707	19.1352	47.345	89.5617	85.2533	77.5233	61.3417	42.3527	28.1597	19.472	18.6637	17.0315
		Post	2710	6.99633	64.9633	164.707	287.417	150.273	85.025	60.06	31.5312	23.4143	34.915	15.546
		Post	2716	5.21	46.175	75.44	72.7783	74.1383	57.225	44.1633	24.2855	14.896	12.2125	6.798
		Post	2717	9.71767	18.952	34.9973	37.9242	26.9037	22.7128	22.914	12.4053	6.45	6.57767	6.516
		Post	2718	9.21783	32.513	64.0517	42.7133	45.1833	30.1188	24.1883	15.0245	13.9517	12.6508	9.96467
		Post	2720	6.16833	18.6447	47.8967	70.7317	45.9633	30.7423	18.2018	10.1725	16.7562	10.786	6.36533
		Post	2701	8.7765	missing	missing	70.2267	53.7033	41.8983	29.501	15.626	10.2823	7.88783	5.8975
		Post	2719	16.3697	63.6833	91.5683	92.725	88.105	69.6017	40.235	12.7145	11.4487	8.14367	7.7705
		Post	2721	5.208	80.0333	97.7417	100.923	158.15	62.8183	13.0947	10.2312	8.42633	5.208	5.208
		Post	2723	10.3172	48.85	76.7683	68.7967	51.2183	33.7127	18.3895	29.4535	45.59	17.2373	6.88983
		Post	2725	5.208	63.245	91.6433	75.7633	37.015	14.6722	12.4353	11.9975	5.208	5.208	5.208
		Post	2727	5.208	80.0333	97.7417	100.923	158.15	62.8183	13.0947	10.2312	8.42633	5.208	5.208
			Mean	8.96106	51.3125	84.7379	92.1813	80.5272	47.7239	28.2192	17.6527	15.3602	12.0582	8.20028
			STD	4.56168	21.5582	33.5561	64.5571	48.4426	21.6332	15.2608	8.2423	10.9522	8.51955	4.01474
			SEM	1.31684	6.50003	10.1175	18.636	13.9842	6.24496	4.40543	2.37935	3.16164	2.45938	1.15895
			N	12	11	11	12	12	12	12	12	12	12	12
	3, H	Correlation between raw GLP-1 (POST) and hunger
		raw GLP-1 values in ng/mL			Y variable
			T0	T15	T60	T120	T180	T240	T300	T360
		Mean	8.96106	51.3125	80.5272	28.2192	17.6527	15.3602	12.0582	8.20028
		SEM	1.31684	6.50003	13.9842	4.40543	2.37935	3.16164	2.45938	1.15895
		N	12	11	12	12	12	12	12	12
		Hunger	X variable
			T0	T15	T60	T120	T180	T240	T300	T360
		Mean	67	14.16	26.33	30.25	52.41	49	58.58	69.64
		SEM	16.76	11.11	13.66	13.91	16	16.61	16.74	17.4
		N	12	12	12	12	12	12	12	12
		Spearman r=-0.95
		P(two-tailed)=0.001
		Number XY pairs=8
	3, I	INSULIN (raw values in mIU/L)
			Subj. #	0	15	30	45	60	90	120	180	240	300	360
		Pre	2707	24.301	86.1065	138	139.84	134.935	159.585	134.235	65.8125	19.5945	17.9325	19.456
		Pre	2710	12.525	25.864	79.4595	123.155	99.3105	64.449	43.4105	26.9215	15.49	17.2205	11.356
		Pre	2716	22.527	98.379	158.57	173.835	147.555	104.633	112.325	38.7265	29.8245	19.5895	21.0765
		Pre	2717	20.7335	107.855	118.135	92.4305	101.276	107.595	89.168	22.0105	25.497	19.6885	19.965
		Pre	2718	24.7885	133.925	392.235	187.21	80.757	35.0515	33.098	50.3375	21.847	37.371	17.933
		Pre	2720	20.5315	22.0125	56.2405	54.5885	85.868	68.293	53.8855	38.8535	23.355	14.2435	16.342
		Pre	2701	23.62	64.285	84.568	89.989	101.724	85.8115	108.175	22.8015	17.179	15.5145	15.987
		Pre	2719	30.033	108.81	173.67	154.25	134.74	143.49	88.5545	27.528	14.9655	22.041	22.7985
		Pre	2721	26.307	76.7785	312.72	363.39	238.39	100.377	59.4175	34.887	21.998	22.4865	22.5795
		Pre	2723	8.02245	16.1125	41.7795	19.123	11.5265	20.737	36.401	21.633	9.2916	6.0719	6.17275
		Pre	2725	30.411	55.196	60.5895	82.875	89.2735	127.15	123.32	113.895	33.13	35.1205	29.54
		Pre	2727	25.431	50.696	148.257	190.338	242.53	207.34	160.041	60.659	28.696	26.514	26.941
			Mean	22.4359	70.5017	147.019	139.252	122.324	102.043	86.8359	43.6721	21.739	21.1495	19.1789
			STD	6.52406	38.034	106.429	88.5357	65.1522	52.8303	41.784	26.6476	6.91246	8.6698	6.3726
			SEM	1.88333	10.9795	30.7235	25.5581	18.8078	15.2508	12.062	7.6925	1.99546	2.50276	1.83961
			N	12	12	12	12	12	12	12	12	12	12	12
	3, J	Correlation raw insulin (PRE) and hunger
		raw insulin		Y variable
			T0	T15	T30	T60	T120	T180	T240	T300	T360
		Mean	22.4359	70.5017	147.019	122.324	86.8359	43.6721	21.739	21.1495	19.1789
		SEM	1.88333	10.9795	30.7235	18.8078	12.062	7.6925	1.99546	2.50276	1.83961
		N	12	12	12	12	12	12	12	12	12
		Hunger	X variable
			T0	T15	T30	T60	T120	T180	T240	T300	T360
		Mean	65.36	19.18	11.77	30	35.82	38	54	65.1	81.91
		SEM	12.87	7.87	4.5	9.6	9.61	9.62	13.25	12.99	13.21
		N	12	12	12	12	12	12	12	12	12
		Spearman r=-0.85
		P(two-tailed)=0.006
		Number XY pairs=9
	3, K	INSULIN (raw values in mIU/L)
		Pre or Post surgery	Subj. #	0	15	30	45	60	90	120	180	240	300	360
		Post	2707	4.21365	113.29	269.825	467.598	346.033	43.3513	21.363	15.303	7.78425	6.8576	7.89705
		Post	2710	4.20025	68.8775	157.58	206.01	208.365	33.8975	11.994	6.21055	4.2133	4.1259	3.7416
		Post	2716	6.4478	63.0655	123.79	183.08	169.655	50.333	24.0905	7.2308	5.7931	4.89055	4.4543
		Post	2717	9.30655	115.625	154.51	167.81	99.1505	36.948	21.4535	10.7105	7.6106	10.5785	8.214
		Post	2718	6.65565	82.9025	288.38	153.905	141.38	32.363	16.244	10.247	6.8007	5.18215	5.9057
		Post	2720	6.64735	59.415	168.145	342.68	421.15	60.446	24.3775	8.51645	7.97115	8.6156	8.223
		Post	2701	9.59055	missing	missing	151.805	118.97	26.4405	12.9985	9.61485	8.54555	8.62035	8.101
		Post	2719	7.35975	242.8	478.13	395.1	685.57	453.38	68.184	19.981	10.8475	9.64075	10.56
		Post	2721	9.9845	261.97	628.65	636.91	615.53	195.236	57.092	16.512	12.106	10.2493	10.39
		Post	2723	0.45437	37.952	52.073	28.5395	19.587	8.8688	4.381	3.2409	3.7103	2.43045	3.14365
		Post	2725	2.49335	99.518	132.79	139.105	85.7545	20.1075	11.6135	4.4262	2.20925	1.9136	0.73006
		Post	2727	1.33485	78.0195	143.105	307.145	301.88	77.2615	9.8639	5.5253	5.22075	5.11285	5.1546
			Mean	5.72405	111.221	236.089	264.974	267.752	86.5528	23.638	9.79321	6.90104	6.51814	6.37625
			STD	3.20412	73.6664	173.143	170.735	213.358	125.246	19.3598	5.14653	2.88062	3.00205	3.02065
			SEM	0.924951	22.2112	52.2046	49.2869	61.591	36.1555	5.58869	1.48567	0.831564	0.866618	0.871987
			N	12	11	11	12	12	12	12	12	12	12	12
	3, L	Correlation between raw insulin (POST) and hunger
		raw insulin values in mIU/L			Y variable
			T0	T15	T60	T120	T180	T240	T300	T360
		Mean	5.72405	111.221	267.752	23.638	9.79321	6.90104	6.51814	6.37625
		SEM	0.924951	22.2112	61.591	5.58869	1.48567	0.831564	0.866618	0.871987
		N	12	11	12	12	12	12	12	12
		Hunger	X variable
			T0	T15	T60	T120	T180	T240	T300	T360
		Mean	67	14.16	26.33	30.25	52.41	49	58.58	69.64
		SEM	16.76	11.11	13.66	13.91	16	16.61	16.74	17.4
		N	12	12	12	12	12	12	12	12
		Spearman r=-0.93
		P(two-tailed)=0.002
		Number XY pairs=8
