# Supplementary material for: Lipocalin-2 is an anorexigenic signal in primates
Source: eLife. 2020 Nov 24;9:e58949. doi: 10.7554/eLife.58949 (PMC7685704; doi:10.7554/eLife.58949)
Supplement: Figure 1—source data 1. [file elife-58949-fig1-data1.xlsx]

## Sheet: Figure 1
Figure 1, A	LCN2 (Log(ln)-transformed values in ng/mL)
	Observation	ID	T0	T15	T30	T45	T60	T90	T120	T180	i
	1	AA-08	3.32396	3.47103	3.8963	3.93828	3.77	3.60875	3.5499	3.32324	9
	2	EA-09	3.34003	3.33185	3.38744	3.41082	3.3499	3.44042	3.27412	3.35131	9
	3	MB-10	4.32625	4.49334	4.22508	4.31602	4.26395	4.21597	4.05768	3.95527	9
	4	SY-11	3.03158	2.90963	2.98971	2.97655	3.07362	2.86847	3.08099	2.95543	9
	5	LT-12	2.92155	3.04118	3.35411	3.21968	3.51065	3.56332	3.35933	3.15572	9
	6	S-K013	2.89536	2.95751	3.0214	2.90471	2.90581	3.01896	2.8792	3.017	9
	7	N-A014	4.08278	4.32493	4.0537	4.36004	4.21065	4.18312	4.20842	4.27986	9
	8	G-T015	2.96062	3.04309	3.15828	3.30542	3.44458	3.27563	3.4837	3.19458	9
	9	L-S016	3.35864	3.6478	3.39719	3.52607	3.57375	3.54154	3.33577	3.52223	9
	10	K-L017	3.58878	3.52754	3.76306	3.68462	3.65247	3.68788	3.63072	3.37383	9
	11	R-K018	2.89037	4.51031	4.33638	4.56132	4.51918	4.4787	4.39827	4.2884	9
		mean	3.33817	3.56893	3.59842	3.65487	3.66132	3.62571	3.56892	3.49244
		SD	0.489989	0.612334	0.479823	0.569891	0.500325	0.500028	0.47393	0.474112
		SEM	0.147737	0.184626	0.144672	0.171829	0.150854	0.150764	0.142895	0.14295
		N	11	11	11	11	11	11	11	11
	Hunger
	Observation	ID	0	15	30	45	60	90	120	180
	1	AA-08	50	10	10	10	10	10	10	20
	2	EA-09	30	50	40	40	30	30	60	80
	3	MB-10	90	10	10	10	30	10	20	30
	4	SY-11	100	85	80	80	80	70	70	80
	5	LT-12	10	10	10	20	20	10	10	10
	6	S-K013	50	10	10	10	10	10	10	10
	7	N-A014	30	10	10	10	10	10	10	10
	8	G-T015	80	40	10	10	20	30	20	40
	9	L-S016	100	80	40	20	10	10	10	30
	10	K-L017	65	10	10	10	10	20	20	40
	11	R-K018	60	50	30	20	10	50	50	60
		mean	60.4545	33.1818	23.6364	21.8182	21.8182	23.6364	26.3636	37.2727
		SD	30.0379	29.5189	22.4823	21.3627	20.8893	20.1359	22.4823	26.1116
		SEM	9.05675	8.90027	6.77867	6.44109	6.29837	6.0712	6.77867	7.87296
		N	11	11	11	11	11	11	11	11
Figure 1, B	LCN2 (Log(ln)-transformed values in ng/mL)			Y variable
	mean	3.33817	3.56893	3.59842	3.65487	3.66132	3.62571	3.56892	3.49244
	SEM	0.147737	0.184626	0.144672	0.171829	0.150854	0.150764	0.142895	0.14295
	N	11	11	11	11	11	11	11	11
	Hunger			X variable
	mean	60.4545	33.1818	23.6364	21.8182	21.8182	23.6364	26.3636	37.2727
	SEM	9.05675	8.90027	6.77867	6.44109	6.29837	6.0712	6.77867	7.87296
	N	11	11	11	11	11	11	11	11
	Spearman r=-0.9818
	P (two-tailed)= 0.0003
	Number of XY pairs=8
Figure 1, C	LCN2 (Log(ln)-transformed values in ng/mL)
	Observation	ID	T0	T60	T105
	1	BJ	4.46361	4.82767	4.75944
	2	PM	4.03034	4.28193	4.12617
	3	LM	3.99673	4.31107	4.22713
	4	RA	4.77272	5.29832	5.18783
	5	BM	4.47369	4.73163	4.43272
	6	BC	4.39074	4.78013	4.79546
	7	LE	4.52915	5.09962	5.02204
	8	BE	3.32719	3.57066	3.40253
	9	SM	4.17777	4.8445	4.82927
		mean	4.24022	4.63839	4.5314
		SD	0.423521	0.515944	0.550337
		SEM	0.141174	0.171981	0.183446
		N	9	9	9
				WHOLE COHORT									WHOLE COHORT-RESPONDERS
Figure 1, D	LCN2 (log(ln)-transformed values in ng/mL)									Figure 1, E	LCN2 (log(ln)-transformed values in ng/mL)
RESPONSE	SEX	Subj. #	T0	T30	T60	T90	T120	T180				Subj. #	T0	T30	T60	T90	T120	T180
R	female	1	2.46274	2.41183	2.50468	2.31785	2.34178	2.76994				1	2.46274	2.41183	2.50468	2.31785	2.34178	2.76994
R	female	6	2.95489	2.92462	3.32091	3.15845	2.82283	3.3691				6	2.95489	2.92462	3.32091	3.15845	2.82283	3.3691
R	female	8	3.19556	3.35253	3.20216	3.26651	3.21743	missing sample				8	3.19556	3.35253	3.20216	3.26651	3.21743	missing sample
R	female	9	3.07256	3.12004	3.07073	3.03035	3.13588	3.15914				9	3.07256	3.12004	3.07073	3.03035	3.13588	3.15914
R	female	13	3.53027	3.60847	3.4204	3.30702	3.53951	3.72012				13	3.53027	3.60847	3.4204	3.30702	3.53951	3.72012
R	female	14	3.87885	4.44495	4.24065	3.88746	3.83042	missing sample				14	3.87885	4.44495	4.24065	3.88746	3.83042	missing sample
R	female	15	3.54447	3.57821	3.53552	3.50467	3.57427	3.50021				15	3.54447	3.57821	3.53552	3.50467	3.57427	3.50021
R	female	20	3.94168	3.73634	4.1133	4.09194	3.81806	3.87239				20	3.94168	3.73634	4.1133	4.09194	3.81806	3.87239
R	female	25	3.55278	3.47467	3.67244	3.52242	3.59174	3.78886				25	3.55278	3.47467	3.67244	3.52242	3.59174	3.78886
R	female	31	3.60162	3.62784	3.75917	3.50524	3.51248	3.73791				31	3.60162	3.62784	3.75917	3.50524	3.51248	3.73791
R	female	32	3.44596	3.17599	3.11786	3.58333	3.28256	3.58441				32	3.44596	3.17599	3.11786	3.58333	3.28256	3.58441
R	female	33	3.24305	3.44679	3.60629	3.48961	3.37424	3.4077				33	3.24305	3.44679	3.60629	3.48961	3.37424	3.4077
R	female	35	3.3282	3.55044	3.10425	3.02621	3.36172	3.3851				35	3.3282	3.55044	3.10425	3.02621	3.36172	3.3851
R	female	43	3.27291	3.21787	3.43135	3.43537	3.43103	3.50669				43	3.27291	3.21787	3.43135	3.43537	3.43103	3.50669
R	female	48	4.2055	4.18309	4.21936	4.36811	4.32434	4.25471				48	4.2055	4.18309	4.21936	4.36811	4.32434	4.25471
R	male	24	4.73118	4.80408	4.8525	4.71475	4.87553	4.67053				24	4.73118	4.80408	4.8525	4.71475	4.87553	4.67053
R	male	29	3.26459	3.38436	3.26226	3.33754	3.06969	2.99094				29	3.26459	3.38436	3.26226	3.33754	3.06969	2.99094
R	male	34	3.31102	3.40424	3.29858	3.33649	3.29558	3.3829				34	3.31102	3.40424	3.29858	3.33649	3.29558	3.3829
R	male	36	3.3978	3.25635	3.31156	3.50734	3.46486	3.54363				36	3.3978	3.25635	3.31156	3.50734	3.46486	3.54363
R	male	39	3.25525	3.46902	3.44233	3.26802	3.30125	missing sample				39	3.25525	3.46902	3.44233	3.26802	3.30125	missing sample
R	male	41	3.88571	3.75073	4.20683	3.67435	3.52918	3.6316				41	3.88571	3.75073	4.20683	3.67435	3.52918	3.6316
R	male	42	3.1029	3.21534	3.49026	3.30163	3.57553	3.34099				42	3.1029	3.21534	3.49026	3.30163	3.57553	3.34099
R	male	44	2.91105	2.61869	2.7104	2.66089	3.07925	3.16773				44	2.91105	2.61869	2.7104	2.66089	3.07925	3.16773
R	male	45	3.15573	3.19798	3.40832	3.20216	3.30496	2.84639				45	3.15573	3.19798	3.40832	3.20216	3.30496	2.84639
R	male	47	3.57206	3.94181	3.72655	3.76118	3.81394	3.67213				47	3.57206	3.94181	3.72655	3.76118	3.81394	3.67213
NR	female	2	4.04547	3.24148	3.68264	3.81619	3.77748	3.25019				Mean	3.43273	3.47585	3.52115	3.45035	3.45872	3.51378
NR	female	4	2.58587	2.61301	2.52474	2.51906	2.54312	2.65423				STD	0.456071	0.512244	0.512265	0.490266	0.476196	0.427758
NR	female	5	3.61736	3.40736	3.51456	3.08234	3.17096	3.6989				SEM	0.0912142	0.102449	0.102453	0.0980531	0.0952393	0.0911984
NR	female	7	3.11139	3.19454	2.77334	3.02813	3.09601	2.96656				N	25	25	25	25	25	22
NR	female	10	3.7076	3.02395	3.24408	3.22365	3.24891	3.43854
NR	female	11	3.96351	3.80196	3.80002	3.89433	3.8294	3.62797		Figure 1, F
NR	female	18	3.81655	3.66967	3.66768	3.59862	3.77555	3.4032			LCN2 (log(ln)-transformed values in ng/mL)					Y variable
NR	female	23	4.2468	4.01709	4.02347	3.81468	3.90338	4.15089				T0	T30	T60	T90	T120	T180
NR	female	30	3.83203	3.57219	3.6498	3.66308	3.72901	3.6984			Mean	3.43273	3.47585	3.52115	3.45035	3.45872	3.51378
NR	female	37	3.3254	3.25186	3.15397	3.14427	3.26114	3.50951			SEM	0.0930951	0.104561	0.104566	0.100075	0.0972032	0.0933445
NR	female	46	3.4331	3.27335	3.23949	3.47814	3.39328	3.42981			N	25	25	25	25	25	22
NR	female	50	3.63205	3.42706	3.33901	3.42673	3.45579	3.83363
NR	female	28	3.40976	3.48413	2.82315	3.29738	2.89728	3.40829			Hunger	X variable
NR	male	3	3.34441	3.00015	3.35517	3.23386	3.25131	3.27658				T0	T30	T60	T90	T120	T180
NR	male	17	3.73171	3.57195	3.5802	3.52051	3.62205	3.63624			Mean	66	29.8	36.7	40.2	46.2	61.3
NR	male	38	3.5654	3.26013	3.1271	3.22014	3.2555	3.19085			SEM	2.9	4.3	4.1	4.3	4.7	3.9
NR	male	40	3.01654	3.06611	3.02723	2.96278	2.95708	3.069			N	25	25	25	25	25	25
NR	male	49	3.87498	3.69766	3.69494	3.84186	3.88826	3.88305
NR	male	51	3.67694	3.292	3.37856	3.47392	3.64848	3.64917			Spearman r=-0.66
NR	male	16	3.39299	3.03693	3.23356	3.0928	3.47354	3.13587			P(two-tailed)=0.33
NR	male	26	3.82528	3.91077	3.67247	3.6858	3.38608	3.57092			Number XY pairs=6
NR	male	27	3.29513	3.25269	3.36358	3.12115	2.92631	3.02923
		Mean	3.49508	3.42473	3.44463	3.41273	3.42464	3.47305
		STD	0.42055	0.436548	0.451846	0.426612	0.425422	0.386153
		SEM	0.0613435	0.0636771	0.0659086	0.0622277	0.0620541	0.0582147
		N	47	47	47	47	47	44
				FEMALES-ALL									FEMALES-RESPONDERS											FEMALES-NON RESPONDERS
Figure 1, G	LCN2 (log(ln)-transformed values in ng/mL)									Figure 1, G	LCN2 (log(ln)-transformed values in ng/mL)									Figure 1, G - 2, F	LCN2 (log(ln)-transformed values in ng/mL)
RESPONSE	SEX	Subj. #	T0	T30	T60	T90	T120	T180				Subj. #	T0	T30	T60	T90	T120	T180				Subj. #	T0	T30	T60	T90	T120	T180
R	female	1	2.46274	2.41183	2.50468	2.31785	2.34178	2.76994				1	2.46274	2.41183	2.50468	2.31785	2.34178	2.76994				2	4.04547	3.24148	3.68264	3.81619	3.77748	3.25019
R	female	6	2.95489	2.92462	3.32091	3.15845	2.82283	3.3691				6	2.95489	2.92462	3.32091	3.15845	2.82283	3.3691				4	2.58587	2.61301	2.52474	2.51906	2.54312	2.65423
R	female	8	3.19556	3.35253	3.20216	3.26651	3.21743	missing sample				8	3.19556	3.35253	3.20216	3.26651	3.21743	missing sample				5	3.61736	3.40736	3.51456	3.08234	3.17096	3.6989
R	female	9	3.07256	3.12004	3.07073	3.03035	3.13588	3.15914				9	3.07256	3.12004	3.07073	3.03035	3.13588	3.15914				7	3.11139	3.19454	2.77334	3.02813	3.09601	2.96656
R	female	13	3.53027	3.60847	3.4204	3.30702	3.53951	3.72012				13	3.53027	3.60847	3.4204	3.30702	3.53951	3.72012				10	3.7076	3.02395	3.24408	3.22365	3.24891	3.43854
R	female	14	3.87885	4.44495	4.24065	3.88746	3.83042	missing sample				14	3.87885	4.44495	4.24065	3.88746	3.83042	missing sample				11	3.96351	3.80196	3.80002	3.89433	3.8294	3.62797
R	female	15	3.54447	3.57821	3.53552	3.50467	3.57427	3.50021				15	3.54447	3.57821	3.53552	3.50467	3.57427	3.50021				18	3.81655	3.66967	3.66768	3.59862	3.77555	3.4032
R	female	20	3.94168	3.73634	4.1133	4.09194	3.81806	3.87239				20	3.94168	3.73634	4.1133	4.09194	3.81806	3.87239				23	4.2468	4.01709	4.02347	3.81468	3.90338	4.15089
R	female	25	3.55278	3.47467	3.67244	3.52242	3.59174	3.78886				25	3.55278	3.47467	3.67244	3.52242	3.59174	3.78886				30	3.83203	3.57219	3.6498	3.66308	3.72901	3.6984
R	female	31	3.60162	3.62784	3.75917	3.50524	3.51248	3.73791				31	3.60162	3.62784	3.75917	3.50524	3.51248	3.73791				37	3.3254	3.25186	3.15397	3.14427	3.26114	3.50951
R	female	32	3.44596	3.17599	3.11786	3.58333	3.28256	3.58441				32	3.44596	3.17599	3.11786	3.58333	3.28256	3.58441				46	3.4331	3.27335	3.23949	3.47814	3.39328	3.42981
R	female	33	3.24305	3.44679	3.60629	3.48961	3.37424	3.4077				33	3.24305	3.44679	3.60629	3.48961	3.37424	3.4077				50	3.63205	3.42706	3.33901	3.42673	3.45579	3.83363
R	female	35	3.3282	3.55044	3.10425	3.02621	3.36172	3.3851				35	3.3282	3.55044	3.10425	3.02621	3.36172	3.3851				28	3.40976	3.48413	2.82315	3.29738	2.89728	3.40829
R	female	43	3.27291	3.21787	3.43135	3.43537	3.43103	3.50669				43	3.27291	3.21787	3.43135	3.43537	3.43103	3.50669				Mean	3.59437	3.3829	3.34123	3.38358	3.39087	3.46693
R	female	48	4.2055	4.18309	4.21936	4.36811	4.32434	4.25471				48	4.2055	4.18309	4.21936	4.36811	4.32434	4.25471				STD	0.434819	0.355306	0.441283	0.389851	0.408816	0.37693
NR	female	2	4.04547	3.24148	3.68264	3.81619	3.77748	3.25019				Mean	3.4154	3.45691	3.48794	3.43297	3.41055	3.54279				SEM	0.120597	0.0985442	0.12239	0.108125	0.113385	0.104541
NR	female	4	2.58587	2.61301	2.52474	2.51906	2.54312	2.65423				STD	0.426235	0.485039	0.47501	0.481772	0.453945	0.361496				N	13	13	13	13	13	13
NR	female	5	3.61736	3.40736	3.51456	3.08234	3.17096	3.6989				SEM	0.110053	0.125237	0.122647	0.124393	0.117208	0.100261
NR	female	7	3.11139	3.19454	2.77334	3.02813	3.09601	2.96656				N	15	15	15	15	15	13
NR	female	10	3.7076	3.02395	3.24408	3.22365	3.24891	3.43854
NR	female	11	3.96351	3.80196	3.80002	3.89433	3.8294	3.62797		Figure 1, H
NR	female	18	3.81655	3.66967	3.66768	3.59862	3.77555	3.4032			LCN2 (log(ln)-transformed values in ng/mL)					Y variable
NR	female	23	4.2468	4.01709	4.02347	3.81468	3.90338	4.15089				T0	T30	T60	T90	T120	T180
NR	female	30	3.83203	3.57219	3.6498	3.66308	3.72901	3.6984			Mean	3.4154	3.45691	3.48794	3.43297	3.41055	3.54279
NR	female	37	3.3254	3.25186	3.15397	3.14427	3.26114	3.50951			SEM	0.110053	0.125237	0.122647	0.124393	0.117208	0.100261
NR	female	46	3.4331	3.27335	3.23949	3.47814	3.39328	3.42981			N	15	15	15	15	15	13
NR	female	50	3.63205	3.42706	3.33901	3.42673	3.45579	3.83363
NR	female	28	3.40976	3.48413	2.82315	3.29738	2.89728	3.40829			Hunger	X variable
		Mean	3.4985	3.42255	3.41982	3.41004	3.40141	3.50486				T0	T30	T60	T90	T120	T180
		STD	0.43185	0.423685	0.457268	0.434198	0.42571	0.363894			Mean	67.3	24.4	30.5	35.7	40.6	62.5
		SEM	0.081612	0.0800689	0.0864156	0.0820557	0.0804517	0.0713655			SEM	4	5.5	5.5	5.5	6.6	5.1
		N	28	28	28	28	28	26			N	15	15	15	15	15	15
											Spearman r=-0.63
											P(two-tailed)=0.33
											Number XY pairs=6
				MALES-ALL									MALES-RESPONDERS											MALES-NON RESPONDERS
Figure 1, J	LCN2 (log(ln)-transformed values in ng/mL)									Figure 1, J	LCN2 (log(ln)-transformed values in ng/mL)									Figure 1, J- 2, G	LCN2 (log(ln)-transformed values in ng/mL)
RESPONSE	SEX	Subj. #	T0	T30	T60	T90	T120	T180				Subj. #	T0	T30	T60	T90	T120	T180				Subj. #	T0	T30	T60	T90	T120	T180
R	male	24	4.73118	4.80408	4.8525	4.71475	4.87553	4.67053				24	4.73118	4.80408	4.8525	4.71475	4.87553	4.67053				3	3.34441	3.00015	3.35517	3.23386	3.25131	3.27658
R	male	29	3.26459	3.38436	3.26226	3.33754	3.06969	2.99094				29	3.26459	3.38436	3.26226	3.33754	3.06969	2.99094				17	3.73171	3.57195	3.5802	3.52051	3.62205	3.63624
R	male	34	3.31102	3.40424	3.29858	3.33649	3.29558	3.3829				34	3.31102	3.40424	3.29858	3.33649	3.29558	3.3829				38	3.5654	3.26013	3.1271	3.22014	3.2555	3.19085
R	male	36	3.3978	3.25635	3.31156	3.50734	3.46486	3.54363				36	3.3978	3.25635	3.31156	3.50734	3.46486	3.54363				40	3.01654	3.06611	3.02723	2.96278	2.95708	3.069
R	male	39	3.25525	3.46902	3.44233	3.26802	3.30125	missing sample				39	3.25525	3.46902	3.44233	3.26802	3.30125	missing sample				49	3.87498	3.69766	3.69494	3.84186	3.88826	3.88305
R	male	41	3.88571	3.75073	4.20683	3.67435	3.52918	3.6316				41	3.88571	3.75073	4.20683	3.67435	3.52918	3.6316				51	3.67694	3.292	3.37856	3.47392	3.64848	3.64917
R	male	42	3.1029	3.21534	3.49026	3.30163	3.57553	3.34099				42	3.1029	3.21534	3.49026	3.30163	3.57553	3.34099				16	3.39299	3.03693	3.23356	3.0928	3.47354	3.13587
R	male	44	2.91105	2.61869	2.7104	2.66089	3.07925	3.16773				44	2.91105	2.61869	2.7104	2.66089	3.07925	3.16773				26	3.82528	3.91077	3.67247	3.6858	3.38608	3.57092
R	male	45	3.15573	3.19798	3.40832	3.20216	3.30496	2.84639				45	3.15573	3.19798	3.40832	3.20216	3.30496	2.84639				27	3.29513	3.25269	3.36358	3.12115	2.92631	3.02923
R	male	47	3.57206	3.94181	3.72655	3.76118	3.81394	3.67213				47	3.57206	3.94181	3.72655	3.76118	3.81394	3.67213				Mean	3.52482	3.34315	3.38142	3.35031	3.37874	3.38232
NR	male	3	3.34441	3.00015	3.35517	3.23386	3.25131	3.27658				Mean	3.45873	3.50426	3.57096	3.47643	3.53098	3.47187				STD	0.283177	0.317428	0.233326	0.295366	0.319086	0.306879
NR	male	17	3.73171	3.57195	3.5802	3.52051	3.62205	3.63624				STD	0.520394	0.576418	0.58668	0.527873	0.523914	0.53005				SEM	0.0943924	0.105809	0.0777752	0.0984554	0.106362	0.102293
NR	male	38	3.5654	3.26013	3.1271	3.22014	3.2555	3.19085				SEM	0.164563	0.182279	0.185525	0.166928	0.165676	0.176683				N	9	9	9	9	9	9
NR	male	40	3.01654	3.06611	3.02723	2.96278	2.95708	3.069				N	10	10	10	10	10	9
NR	male	49	3.87498	3.69766	3.69494	3.84186	3.88826	3.88305
NR	male	51	3.67694	3.292	3.37856	3.47392	3.64848	3.64917		Figure 1,K	Correlation between LCN2 log and hunger
NR	male	16	3.39299	3.03693	3.23356	3.0928	3.47354	3.13587			LCN2 (log(ln)-transformed values in ng/mL)					Y variable
NR	male	26	3.82528	3.91077	3.67247	3.6858	3.38608	3.57092				T0	T30	T60	T90	T120	T180
NR	male	27	3.29513	3.25269	3.36358	3.12115	2.92631	3.02923			Mean	3.45873	3.50426	3.57096	3.47643	3.53098	3.47187
		Mean	3.49004	3.42795	3.48118	3.41669	3.45886	3.4271			SEM	0.164563	0.182279	0.185525	0.166928	0.165676	0.176683
		STD	0.414963	0.466628	0.453593	0.426948	0.434274	0.422674			N	10	10	10	10	10	9
		SEM	0.095199	0.107052	0.104061	0.0979487	0.0996293	0.0996252
		N	19	19	19	19	19	18			Hunger	X variable
												T0	T30	T60	T90	T120	T180
											Mean	63.96	37.85	46.17	47.13	54.56	59.53
											SEM	4.17	6.51	5.15	6.46	5.97	6.36
											N	10	10	10	10	10	10
											Spearman r=-0.39
											P(two-tailed)=0.67
											Number XY pairs=6
Figure 1I-L
Subject ID	Sex	BMI	WC
1	female	26.33	89
6	female	33.3	94
8	female	24.75	80
9	female	24.5	90
13	female	27.18	96
14	female	31.36	120
15	female	27.06	89
20	female	27.07	93
25	female	28	95
31	female	27.88	92
32	female	26.51	85
33	female	26.45	85
35	female	31.67	90
43	female	25.27	82
48	female	30.74	104
	mean	27.8713	92.2667
	SEM	0.690824	2.51181
	N	15	15
24	male	29.37	100
29	male	24.38	93
34	male	31.32	107
36	male	35.3	119
39	male	24.89	93
41	male	31.84	105
42	male	24.82	86
44	male	28.34	85
45	male	23.62	85
47	male	33.49	109
	mean	28.737	98.2
	SEM	1.32427	3.69324
	N	10	10
mixed gender R:	mean	28.2176	94.64
	SEM	0.614186	1.99272
	N	25	25
2	female	24.4	80
4	female	34.4	115
5	female	30.94	117
7	female	28.82	85
10	female	35.4	154
11	female	34.88	120
18	female	29.06	84
23	female	23.5	98
30	female	26.4	95
37	female	27.98	99
46	female	33.5	106
50	female	33.44	96
28	female	27.41	103
	mean	30.01	104
	SEM	1.12357	5.42667
	N	13	13
3	male	25.57	90
17	male	25.23	124
38	male	27.02	101
40	male	28.3	99
49	male	33.47	113
51	male	27.07	103
16	male	30.25	84
26	male	30.35	110
27	male	25.44	77
	mean	28.0778	100.111
	SEM	0.931681	4.91722
	N	9	9
mixed gender NR:	mean	29.2195	102.409
	SEM	0.715204	3.42778
	N	22	22
Figure 1, M
LCN2 (log(ln)-transformed values in ng/mL)														LCN2 Fold over baseline
Pre or Post surgery	Subj. #	T0	T15	T30	T45	T60	T90	T120	T180	T240	T300	T360		Pre or Post surgery	Subj. #	T0	T15	T30	T45	T60	T90	T120	T180	T240	T300	T360
Pre	2707	4.39219	4.26492	4.14811	4.04896	3.64623	3.54121	3.2357	3.34133	3.49968	3.63846	3.60211		Pre	2707	1	0.971023	0.944428	0.921855	0.830161	0.806251	0.736693	0.760743	0.796796	0.828393	0.820116
Pre	2710	3.91338	4.52966	3.96669	4.30648	3.89091	3.52066	3.76855	3.64907	4.0113	4.31563	4.04224		Pre	2710	1	1.15748	1.01362	1.10045	0.994259	0.899647	0.96299	0.932459	1.02502	1.10279	1.03293
Pre	2716	3.96444	4.07879	3.68112	3.57597	4.0233	3.84431	4.03323	3.86433	3.39652	4.00864	4.15408		Pre	2716	1	1.02884	0.928536	0.902013	1.01485	0.969699	1.01735	0.974749	0.856747	1.01115	1.04784
Pre	2717	3.67585	3.91319	3.71698	4.14792	3.7614	3.59164	3.50243	3.6878	3.69393	3.18941	3.69538		Pre	2717	1	1.06457	1.01119	1.12843	1.02327	0.977091	0.952823	1.00325	1.00492	0.867665	1.00531
Pre	2718	4.79952	4.49737	4.89869	4.15564	4.60692	4.74511	4.79835	4.92789	5.18589	4.72507	4.78981		Pre	2718	1	0.937047	1.02066	0.865845	0.959873	0.988664	0.999756	1.02675	1.0805	0.984488	0.997977
Pre	2720	4.65375	4.56452	4.55949	4.33243	4.22571	4.07928	4.1097	4.45046	5.27536	4.10188	4.30931		Pre	2720	1	0.980826	0.979745	0.930956	0.908022	0.876557	0.883095	0.956317	1.13357	0.881413	0.925986
Pre	2701	3.58958	3.54127	3.64966	3.74471	3.76057	3.62046	3.53349	3.88526	3.6159	3.77005	3.72862		Pre	2701	1	0.986542	1.01674	1.04322	1.04764	1.0086	0.984374	1.08237	1.00733	1.05028	1.03873
Pre	2719	3.77576	3.69712	3.79762	3.47988	3.50073	3.46904	3.52569	3.48721	3.57668	3.55231	3.63229		Pre	2719	1	0.979173	1.00579	0.921637	0.92716	0.918766	0.933771	0.92358	0.947275	0.940822	0.962003
Pre	2721	3.84609	3.86014	3.95267	4.00061	3.89515	3.9493	3.68442	3.60225	3.65365	3.67391	3.74351		Pre	2721	1	1.00365	1.02771	1.04017	1.01276	1.02684	0.957964	0.936599	0.949964	0.955233	0.973329
Pre	2723	4.17394	4.14867	4.12928	4.14698	4.15549	4.00026	4.12628	4.18692	4.37293	4.18626	4.18792		Pre	2723	1	0.993946	0.9893	0.993541	0.995579	0.958389	0.988582	1.00311	1.04768	1.00295	1.00335
Pre	2725	4.1086	4.15124	4.19518	4.15752	4.08311	4.0394	4.15593	3.9925	4.00967	3.81702	3.82849		Pre	2725	1	1.01038	1.02107	1.01191	0.993795	0.983157	1.01152	0.971743	0.975921	0.929032	0.931823
Pre	2727	3.55702	3.55503	3.33808	3.31894	3.79943	3.56969	3.61106	3.64153	3.56706	3.62808	3.63478		Pre	2727	1	0.99944	0.938447	0.933067	1.06815	1.00356	1.01519	1.02376	1.00282	1.01998	1.02186
	Mean	4.03751	4.06683	4.0028	3.95134	3.94574	3.83086	3.8404	3.89305	3.98821	3.88389	3.94571			Mean	1	1.00941	0.991437	0.982757	0.981292	0.951435	0.953676	0.966286	0.985712	0.964516	0.980105
	STD	0.404305	0.362019	0.424725	0.33714	0.296557	0.364904	0.422533	0.446942	0.640513	0.407647	0.360996			STD	0	0.0561504	0.0355378	0.0829976	0.0660238	0.064341	0.0786444	0.0794613	0.091718	0.0799566	0.0641617
	SEM	0.116713	0.104506	0.122607	0.0973238	0.0856087	0.105339	0.121975	0.129021	0.1849	0.117678	0.104211			SEM	0	0.0162092	0.0102589	0.0239594	0.0190594	0.0185736	0.0227027	0.0229385	0.0264767	0.0230815	0.0185219
	N	12	12	12	12	12	12	12	12	12	12	12			N	12	12	12	12	12	12	12	12	12	12	12
Correlation between log lCN2 (PRE) and hunger
LCN2 (log(ln)-transformed values in ng/mL)				Y variable
	T0	T15	T30	T60	T120	T180	T240	T300	T360
Mean	4.03751	4.06683	4.0028	3.94574	3.8404	3.89305	3.98821	3.88389	3.94571
SEM	0.116713	0.104506	0.122607	0.0856087	0.121975	0.129021	0.1849	0.117678	0.104211
N	12	12	12	12	12	12	12	12	12
Hunger	X variable
	T0	T15	T30	T60	T120	T180	T240	T300	T360
Mean	65.36	19.18	11.77	30	35.82	38	54	65.1	81.91
SEM	12.87	7.87	4.5	9.6	9.61	9.62	13.25	12.99	13.21
N	12	12	12	12	12	12	12	12	12
Spearman r=-0.18
P(two-tailed)=0.64
Number XY pairs=9
LCN2 (log(ln)-transformed values in ng/mL)														LCN2 Fold over baseline
Pre or Post surgery	Subj. #	T0	T15	T30	T45	T60	T90	T120	T180	T240	T300	T360		Pre or Post surgery	Subj. #	T0	T15	T30	T45	T60	T90	T120	T180	T240	T300	T360
Post	2707	3.32053	3.44095	3.64821	3.00094	3.20185	3.3912	3.23433	3.61492	3.40617	3.16912	3.46471		Post	2707	1	1.03627	1.09868	0.903752	0.964259	1.02128	0.974041	1.08866	1.02579	0.9544	1.04342
Post	2710	3.8318	4.52021	3.599	3.93081	4.30469	4.50681	3.67651	4.30697	4.59086	3.75353	3.80834		Post	2710	1	1.17966	0.939247	1.02584	1.12341	1.17616	0.959473	1.12401	1.1981	0.979574	0.993877
Post	2716	3.54681	3.459	3.81574	4.01357	4.06176	4.22497	3.45067	3.79072	4.161	4.05817	3.26197		Post	2716	1	0.975243	1.07582	1.1316	1.14519	1.1912	0.972895	1.06877	1.17317	1.14417	0.91969
Post	2717	3.02257	3.80276	3.89634	3.77465	4.1764	4.24506	3.75619	3.85603	4.30944	4.1791	4.35645		Post	2717	1	1.25812	1.28908	1.24882	1.38174	1.40445	1.24271	1.27574	1.42575	1.38263	1.4413
Post	2718	4.35131	4.54487	4.53618	4.56741	5.29525	5.6649	4.25951	4.46417	4.23337	4.56434	4.23236		Post	2718	1	1.04448	1.04248	1.04966	1.21693	1.30188	0.978903	1.02594	0.972896	1.04896	0.972663
Post	2720	4.0064	4.30577	4.13802	3.85509	4.2098	4.34352	4.31072	4.15215	4.13113	4.33958	3.95545		Post	2720	1	1.07472	1.03285	0.962234	1.05077	1.08415	1.07596	1.03638	1.03113	1.08316	0.987283
Post	2701	3.79882	missing sample	missing sample	3.94559	3.90959	3.78008	3.99297	3.91055	3.89414	3.79601	3.96586		Post	2701	1	missing	missing	1.03864	1.02916	0.995066	1.05111	1.02941	1.02509	0.999261	1.04397
Post	2719	3.76029	3.88057	3.77506	3.67768	3.59665	3.6838	3.66281	3.61072	3.70297	3.67211	3.88857		Post	2719	1	1.03199	1.00393	0.978029	0.956481	0.979657	0.974076	0.960222	0.984757	0.976548	1.03411
Post	2721	4.16166	4.04596	4.20336	3.98926	3.81237	3.93135	3.95532	3.85521	3.92794	3.93936	3.98564		Post	2721	1	0.972199	1.01002	0.958573	0.916068	0.944658	0.950417	0.926364	0.94384	0.946583	0.957704
Post	2723	4.23015	4.31826	4.42558	4.35289	4.29634	4.10789	4.19767	4.18714	4.21821	4.18785	4.31651		Post	2723	1	1.02083	1.0462	1.02901	1.01565	0.971099	0.992321	0.989833	0.997178	0.99	1.02042
Post	2725	3.76071	4.71408	3.54295	3.55459	3.54861	3.61367	3.59818	3.54997	3.78389	3.56864	3.82849		Post	2725	1	1.25351	0.942097	0.945192	0.943603	0.960902	0.956784	0.943962	1.00616	0.948927	1.01802
Post	2727	3.69722	3.82647	3.7536	3.775	3.74332	3.77701	3.79269	3.653	3.89065	3.75612	3.55332		Post	2727	1	1.03496	1.01525	1.02104	1.01247	1.02158	1.02582	0.988041	1.05232	1.01593	0.961079
	Mean	3.79069	4.07808	3.93946	3.86979	4.01305	4.10585	3.82397	3.91263	4.02082	3.91533	3.88481			Mean	1	1.08018	1.04506	1.02437	1.06298	1.08767	1.01288	1.03811	1.06968	1.03918	1.0328
	STD	0.378324	0.4354	0.337364	0.390092	0.526393	0.592166	0.330754	0.300379	0.316339	0.377549	0.335026			STD	0	0.102662	0.0944088	0.0923972	0.134409	0.148913	0.0823087	0.0952631	0.135309	0.123195	0.134254
	SEM	0.109213	0.125689	0.0973885	0.11261	0.151956	0.170944	0.0954804	0.0867119	0.0913193	0.108989	0.0967136			SEM	0	0.029636	0.0272535	0.0266728	0.0388005	0.0429876	0.0237605	0.0275001	0.0390603	0.0355633	0.0387558
	N	12	11	11	12	12	12	12	12	12	12	12			N	12	11	11	12	12	12	12	12	12	12	12
