# Supplementary material for: Lipocalin-2 is an anorexigenic signal in primates
Source: eLife. 2020 Nov 24;9:e58949. doi: 10.7554/eLife.58949 (PMC7685704; doi:10.7554/eLife.58949)
Supplement: Figure 3—figure supplement 1—source data 1. [file elife-58949-fig3-figsupp1-data1.xlsx]

## Sheet: Cumulative (from %)
Week	Date	ID: 1126	ID: 1869	ID: 2065	ID: 1285	ID: 1951	ID: 2079
			Saline			LCN2			days	Saline 1	Saline 2	Saline 3	LCN2 1	LCN2 2	LCN2 3			Saline 1	Saline 2	Saline 3	Lcn2 1	LCN2 2	Lcn2 3	ttest	time (days)	Saline	LCN2	Sem S	Sem L
0_PreBase	43283								0	0	0	0	0	0	0		0	0	0	0	0	0	0		0	0	0	0	0
	43284	0.2389	0.2612	0.3064	0.3852	0.6878	0.5		1	0.5861	0.72245	0.4915	0.5759	0.53175	0.59525		1	0.5861	0.72245	0.4915	0.5759	0.53175	0.59525	0.666004	1	0.600017	0.567633	0.0670317	0.0187911
	43285	0.2111	0.4735	0.2426	0.2926	0.4195	0.3048		2	0.4648	0.512933	0.441133	0.477767	0.587	0.547633		2	1.0509	1.23538	0.932633	1.05367	1.11875	1.14288	0.74462	2	1.07297	1.1051	0.0880904	0.0266436
	43286	0.5444	0.5796	0.4723	0.6185	0.6683	0.6		3	0.4833	0.5728	0.404267	0.460467	0.4927	0.457167		3	1.5342	1.80818	1.3369	1.51413	1.61145	1.60005	0.917475	3	1.55976	1.57521	0.136647	0.0307157
									4	0.566667	0.6313	0.503533	0.6358	0.585367	0.517467		4	2.10087	2.43948	1.84043	2.14993	2.19682	2.11752	0.881323	4	2.12693	2.15476	0.173421	0.0230186
									5	0.5139	0.62245	0.54465	0.49075	0.52195	0.40715		5	2.61477	3.06193	2.38508	2.64068	2.71877	2.52467	0.788583	5	2.68726	2.62804	0.198723	0.0563874
A_Base1a	43290	0.4778	0.6327	0.4213	0.437	0.4976	0.5286
	43291	0.5167	0.5306	0.3574	0.5667	0.6049	0.3048
	43292	0.5444	0.6327	0.5064	0.5444	0.5854	0.5381
	43293	0.5667	0.5878	0.5404	0.5259	0.5024	0.6524
	43294	0.4167	0.4939	0.4723	0.4074	0.5659	0.2667
A_Base1b	43297	0.6944	0.8122	0.5617	0.7148	0.5659	0.6619
	43298	0.6111	0.6449	0.5106	0.5037	0.4878	0.6048
	43299	0.6944	0.6122	0.4638	0.5444	0.4732	0.5286
	43300	0.5889	0.7265	0.4979	0.763	0.5854	0.3		ID: 1126	ID: 1869	ID: 2065	ID: 1285	ID: 1951	ID: 2079
	43301	0.6111	0.751	0.617	0.5741	0.478	0.5476		Saline 1	Saline 2	Saline 3	LCN2 1	LCN2 2	LCN2 3	week 1	Saline	LCN2	SEM S	SEM L	ttest
									0	0	0	0	0	0	0	0	0	0	0
B_Test1	43304	0.7111	0.6367	0.5787	0.7481	0.7122	0.6762	d1	0.7111	0.6367	0.5787	0.7481	0.7122	0.6762	1	0.642167	0.712167	0.0383182	0.0207557	0.183483
	43305	0.5556	0.6327	0.4298	0.3852	0.3951	0.4667	d2	1.2667	1.2694	1.0085	1.1333	1.1073	1.1429	2	1.18153	1.12783	0.0865202	0.0106341	0.571203
	43306	0.5167	0.5878	0.4085	0.5333	0.3902	0.4333	d3	1.7834	1.8572	1.417	1.6666	1.4975	1.5762	3	1.68587	1.5801	0.136111	0.0488539	0.505088
	43307	0.4444	0.5102	0.3872	0.3852	0.2829	0.2714	d4	2.2278	2.3674	1.8042	2.0518	1.7804	1.8476	4	2.13313	1.89327	0.169332	0.0816059	0.270985
	43308	0.5389	0.4776	0.417	0.4741	0.3415	0.1762	d5	2.7667	2.845	2.2212	2.5259	2.1219	2.0238	5	2.61097	2.22387	0.19619	0.153649	0.19529
		0	0	0	0	0	0		Saline 1	Saline 2	Saline 3	LCN2 1	LCN2 2	LCN2 3		Saline	LCN2	SEM S	SEM L	ttest
B_Baseline	43318	0.755556	0.763265	0.668085	0.796296	0.409756	0.780952		0	0	0	0	0	0	0	0	0	0	0
	43319	0.722222	0.702041	0.570213	0.448148	0.468293	0.504762		0.755556	0.763265	0.668085	0.796296	0.409756	0.780952	1	0.728969	0.662335	0.030523	0.126367	0.635263
	43320	0.672222	0.542857	0.587234	0.507407	0.409756	0.52381		1.47778	1.46531	1.2383	1.24444	0.878049	1.28571	2	1.39379	1.13607	0.0778313	0.129559	0.163355
	43321	0.7	0.677551	0.502128	0.581481	0.209756	0.428571		2.15	2.00816	1.82553	1.75185	1.2878	1.80952	3	1.99457	1.61639	0.0939123	0.165136	0.117361
	43322	0.683333	0.763265	0.67234	0.666667	0.419512	0.557143		2.85	2.68571	2.32766	2.33333	1.49756	2.2381	4	2.62112	2.023	0.154206	0.264152	0.122183
									3.53333	3.44898	3	3	1.91707	2.79524	5	3.32744	2.57077	0.16552	0.332151	0.111077
D_Test2	43325	0.805556	0.620408	0.680851	0.525926	0.497561	0.528571		LCN2 1	LCN2 2	LCN2 3	Saline 1	Saline 2	Saline 3
	43326	0.633333	0.567347	0.548936	0.555556	0.439024	0.504762		0	0	0	0	0	0	week 2	Saline	LCN2	SEM S	SEM L
	43327	0.672222	0.191837	0.502128	0.507407	0.434146	0.442857		0.805556	0.620408	0.680851	0.525926	0.497561	0.528571	0	0	0	0	0
	43328	0.455556	0.240816	0.344681	0.474074	0.42439	0.247619		1.43889	1.18776	1.22979	1.08148	0.936585	1.03333	1	0.517353	0.702272	0.00992532	0.05451
	43329	0.561111	0.457143	0.455319	0.381481	0.419512	0.295238		2.11111	1.37959	1.73191	1.58889	1.37073	1.47619	2	1.01713	1.28548	0.042605	0.0776596
									2.56667	1.62041	2.0766	2.06296	1.79512	1.72381	3	1.4786	1.74087	0.0629881	0.211219
									3.12778	2.07755	2.53191	2.44444	2.21463	2.01905	4	1.86063	2.08789	0.103239	0.27322
															5	2.22604	2.57908	0.122934	0.30409
									COMBINED TREATMENT WEEKS
									Saline 1	Saline 2	Saline 3	Saline 4	Saline 5	Saline 6	Saline	Sem S		days	Saline	LCN2	SEM S	SEM L
									0	0	0	0	0	0	0	0		0	0	0	0	0
									0.7111	0.6367	0.5787	0.525926	0.497561	0.528571	0.57976	0.0330497		1	0.57976	0.707219	0.0330497	0.0261787
									1.2667	1.2694	1.0085	1.08148	0.936585	1.03333	1.09933	0.0566706		2	1.09933	1.20666	0.0566706	0.0497132
									1.7834	1.8572	1.417	1.58889	1.37073	1.47619	1.58224	0.0815269		3	1.58224	1.66049	0.0815269	0.103404
									2.2278	2.3674	1.8042	2.06296	1.79512	1.72381	1.99688	0.107607		4	1.99688	1.99058	0.107607	0.134743
									2.7667	2.845	2.2212	2.44444	2.21463	2.01905	2.4185	0.134644		5	2.4185	2.40147	0.134644	0.171827
									LCN2 1	LCN2 2	LCN2 3	LCN2 4	LCN2 5	LCN2 6	LCN2	Sem L	ttest
									0	0	0	0	0	0	0	0
									0.7481	0.7122	0.6762	0.805556	0.620408	0.680851	0.707219	0.0261787	0.0128272
									1.1333	1.1073	1.1429	1.43889	1.18776	1.22979	1.20666	0.0497132	0.184994
									1.6666	1.4975	1.5762	2.11111	1.37959	1.73191	1.66049	0.103404	0.565538
									2.0518	1.7804	1.8476	2.56667	1.62041	2.0766	1.99058	0.134743	0.971557
									2.5259	2.1219	2.0238	3.12778	2.07755	2.53191	2.40147	0.171827	0.939355

## Sheet: Cumulative (from grams)
			Saline			LCN2
		1126	1285	1869	1951	2065	2079		days	Saline 1	Saline 2	Saline 3	LCN2 1	LCN2 2	LCN2 3			Saline 1	Saline 2	Saline 3	Lcn2 1	LCN2 2	Lcn2 3	ttest	time (days)	Saline	LCN2	Sem S	Sem L
Pre-base	2018-07-03	43	104	64	141	72	105		0	0	0	0	0	0	0		0	0	0	0	0	0	0		0	0	0	0	0
	2018-07-04	38	79	116	86	57	64		1	105.5	155.5	177	109	115.5	125		1	105.5	155.5	177	109	115.5	125	0.245291	1	146	116.5	21.1798	4.64579
	2018-07-05	98	167	142	137	111	126		2	82	131	117.333	121.667	92	98.6667		2	187.5	286.5	294.333	230.667	207.5	223.667	0.368519	2	256.111	220.611	34.38	6.85993
Indiv aver		59.6667	116.667	107.333	121.333	80	98.3333		3	87	124.333	140.333	101	95	96		3	274.5	410.833	434.667	331.667	302.5	319.667	0.335216	3	373.333	317.944	49.8933	8.46361
Group average		94.5556			99.8889				4	102	171.667	154.667	120	118.333	108.667		4	376.5	582.5	589.333	451.667	420.833	428.333	0.306569	4	516.111	433.611	69.8334	9.28376
Group sem		17.6513			11.9572				5	92.5	132.5	152.5	107	128	85.5		5	469	715	741.833	558.667	548.833	513.833	0.312387	5	641.944	540.444	86.8185	13.605
ttest		0.814789
Base 1	2018-07-09	86	118	155	102	99	111
	2018-07-10	93	153	130	124	84	64
	2018-07-11	98	147	155	120	119	113
	2018-07-12	102	142	144	103	127	137
	2018-07-13	75	110	121	116	111	56
Indiv aver		90.8	134	141	113	108	96.2
Group average		121.933			105.733
Group sem		15.6973			4.98041
ttest		0.380956
Base 2	2018-07-16	125	193	199	116	132	139
	2018-07-17	110	136	158	100	120	127
	2018-07-18	125	147	150	97	109	111
	2018-07-19	106	206	178	120	117	63
	2018-07-20	110	155	184	98	145	115
Indiv aver		115.2	167.4	173.8	106.2	124.6	111
Group average		152.133			113.933
Group sem		18.5589			5.51039
ttest		0.119733
Average of baselines		122.874			106.519
SEM of baselines		12.0134			4.54531					Saline 1	Saline 2	Saline 3	Lcn2 1	LCN2 2	Lcn2 3		ttest	time (days)	Saline	LCN2	Sem S	Sem L
ttest of baselines		82							0	0	0	0	0	0	0		#DIV/0!	0	0	0	0	0
Treat 1	2018-07-23	128	202	156	146	136	142		1	128	202	156	146	136	142		0.396145	1	162	141.333	21.5716	2.90593
	2018-07-24	100	104	155	81	101	98		2	228	306	311	227	237	240		0.158568	2	281.667	234.667	26.8721	3.92994
	2018-07-25	93	144	144	80	96	91		3	321	450	455	307	333	331		0.129656	3	408.667	323.667	43.8571	8.35331
	2018-07-26	80	104	125	58	91	57		4	401	554	580	365	424	388		0.110606	4	511.667	392.333	55.84	17.1691
	2018-07-27	97	128	117	70	98	37		5	498	682	697	435	522	425		0.0808115	5	625.667	460.667	63.98	30.8022
Indiv aver		92.5	120	135.25	72.25	96.5	70.75																							COMBINED TREATMENTS CUMULATIVE
Group average		115.917			79.8333
Group sem		12.5086			8.34458																										Saline 1	Saline 2	Saline 3	Saline 4	Saline 5	Saline 6	Saline	Sem S		days	Saline	LCN2	SEM S	SEM L
ttest		0.0743796								Saline 1	Saline 2	Saline 3	Lcn2 1	LCN2 2	Lcn2 3		ttest	time (days)	Saline	LCN2	Sem S	Sem L								0	0	0	0	0	0	0	0	0		0	0	0	0	0
Base after washout	2018-08-06	136	215	187	84	157	164		0	0	0	0	0	0	0		#DIV/0!	0	0	0	0	0								1	130	121	172	90	129	106	124.667	11.3304		1	124.667	123.167	11.3304	8.57289
	2018-08-07	130	121	172	96	134	106		1	130	121	172	96	134	106		0.209258	1	141	112	15.7162	11.3725								2	251	258	305	179	247	199	239.833	18.3674		2	239.833	229.333	18.3674	17.9512
	2018-08-08	121	137	133	84	138	110		2	251	258	305	180	272	216		0.199343	2	271.333	222.667	16.9542	26.7665								3	377	415	471	266	328	251	351.333	35.0834		3	351.333	316	35.0834	31.1277
	2018-08-09	126	157	166	43	118	90		3	377	415	471	223	390	306		0.107267	3	421	306.333	27.3008	48.209								4	500	595	658	352	435	313	475.5	55.2224		4	475.5	428.833	55.2224	37.3376
	2018-08-10	123	180	187	86	158	117		4	500	595	658	309	548	423		0.129951	4	584.333	426.667	45.9214	69.0177								5	627.2	757	827	440	543.75	391.25	597.7	70.5282		5	597.7	538.875	70.5282	46.9293
Indiv aver		127.2	162	169	78.6	141	117.4		5	627.2	757	827	387.6	689	540.4		0.131936	5	737.067	539	58.5321	87.0095
Group average		152.733			112.333																									0	Lcn2 1	LCN2 2	Lcn2 3	LCN2 1	LCN2 2	LCN2 3	LCN2	Sem L	ttest
Group sem		12.9256			18.1906																									1	0	0	0	0	0	0	0	0
ttest		0.144476																												2	96	134	106	114	150	139	123.167	8.57289	0.918009
	CROSSOVER	1126	1285	1869	1951	2065	2079			LCN2 1	LCN2 2	LCN2 3	Saline 1	Saline 2	Saline 3		ttest	time (days)	LCN2	Saline	Sem L	Sem S								3	180	272	216	235	287	186	229.333	17.9512	0.691279
	2018-08-13	145	142	152	102	160	111		0	0	0	0	0	0	0		#DIV/0!	0	0	0	0	0								4	223	390	306	317	415	245	316	31.1277	0.468607
	2018-08-14	114	150	139	90	129	106		1	114	150	139	90	129	106		0.169667	1	134.333	108.333	10.651	11.3186								5	309	548	423	418	518	357	428.833	37.3376	0.499848
Treat 2	2018-08-15	121	137	47	89	118	93		2	235	287	186	179	247	199		0.478855	2	236	208.333	29.1605	20.177									387.6	689	540.4	522.5	647.5	446.25	538.875	46.9293	0.503251
	2018-08-16	82	128	59	87	81	52		3	317	415	245	266	328	251		0.465599	3	325.667	281.667	49.2657	23.5679
	2018-08-17	101	103	112	86	107	62		4	418	518	357	352	435	313		0.337768	4	431	366.667	46.929	35.9738
Indiv aver		104.5	129.5	89.25	88	108.75	78.25		5	522.5	647.5	446.25	440	543.75	391.25		0.337768	5	538.75	458.333	58.6613	44.9672
Group average		107.75			91.6667
Group sem		11.7323			8.99344
ttest		0.337768
																							PERCENT OF BASELINE
COMBINE TREATMENT WEEKS
																								Baseline	Treatment 1	Baseline a.w.	Treatment 2			Baseline	Treatment 1	Baseline	Treatment 2
BASELINE	1126	1285	1869	1951	2065	2079																	Saline	122.874	115.917	112.333	91.6667		Saline	1	0.943378	1	0.816024
Prebase	59.6667	116.667	107.333	121.333	80	98.3333																	LCN2	106.519	79.8333	152.733	107.75		LCN2	1	0.749478	1	0.705478
Baseline 1	90.8	134	141	113	108	96.2																	S-SEM	17.1637	12.5086	18.1906	8.99344
Baseline 2	115.2	167.4	173.8	106.2	124.6	111																	L-SEM	3.56181	8.34458	12.9256	11.7323
	88.5556	139.356	140.711	113.511	104.2	101.844
Average		122.874			106.519
SEM		17.1637			3.56181																		TREATMENT WEEK 1
											Treatment week 1												Percent of baseline		BASELINE					TREATMENT							Baseline	Treatment
BASELINE AFTER WASHOUT	1126	1285	1869	1951	2065	2079		Subject	Baseline 1	Baseline 2	Baseline 3	Baseline M	Base SEM	Treat 1	Treat 2		Treat 3	Treat mean	Treat SEM	ttest			Subject	1	2	3	Baseline M	Base SEM	1	2	3	Baseline M	Base SEM	ttest		Saline	1	0.943378
	127.2	162	169	78.6	141	117.4		Saline	88.5556	139.356	140.711	122.874	17.1637	92.5	120		135.25	115.917	12.5086	#N/A	-0.311287		Saline	0.720702	1.13413	1.14517	1	0.139685	0.752803	0.97661	1.10072	0.943378	0.1018	0.205681		LCN2	1	0.749478
		152.733			112.333			LCN2	113.511	104.2	101.844	106.519	3.56181	72.25	96.5		70.75	79.8333	8.34458	#N/A			LCN2	1.06565	0.978234	0.95612	1	0.0334384	0.678286	0.905946	0.664204	0.749478	0.0783392			SEM SALINE	0.139685	0.1018
		12.9256			18.1906								unpaired ttest	0.0743796																						SEM LCN2	0.0334384	0.0783392
SALINE	1126	1285	1869	1951	2065	2079
	92.5	120	135.25	88	108.75	78.25																	TREATMENT WEEK 2
Average		115.917			91.6667						Treatment week 2												Percent of baseline		BASELINE					TREATMENT							Baseline	Treatment
SEM		12.5086			8.99344			Subject	Baseline 1	Baseline 2	Baseline 3	Baseline M	Base SEM	Treat 1	Treat 2		Treat 3	Treat mean	Treat SEM	ttest			Subject	1	2	3	Baseline M	Base SEM	1	2	3	Baseline M	Base SEM			Saline	1	0.816024
ttest								Saline	78.6	141	117.4	112.333	12.9256	88	108.75		78.25	91.6667	8.99344	#N/A	0.175455		Saline	0.699703	1.25519	1.0451	1	0.161934	0.783383	0.968101	0.696588	0.816024	0.0800603			LCN2	1	0.705478
	1126	1285	1869	1951	2065	2079		LCN2	127.2	162	169	152.733	18.1906	104.5	129.5		89.25	107.75	11.7323	#N/A			LCN2	0.832824	1.06067	1.1065	1	0.0846285	0.684199	0.847883	0.584352	0.705478	0.0768153			SEM SALINE	0.161934	0.0800603
LCN2	104.5	129.5	89.25	72.25	96.5	70.75							unpaired ttest	0.337768																						SEM LCN2	0.0846285	0.0768153
Average		107.75			79.8333																		COMBINATION OF TWO WEEKS OF TREATMENT (% BASELINE)
SEM		11.7323			8.34458																				BEFORE TREATMENT						TREATMENT				ttest
ttest																						SALINE	0.720702	1.13413	1.14517	0.699703	1.25519	1.0451	0.752803	0.97661	1.10072	0.783383	0.968101	0.696588	0.151675
																						LCN2	1.06565	0.978234	0.95612	0.832824	1.06067	1.1065	0.678286	0.905946	0.664204	0.684199	0.847883	0.584352	0.00968949
																						MEAN SALINE	1	0.0956396					0.879701	0.064541					0.0919259
																						MEAN LCN2	1	0.0406943					0.727478	0.0500432
																							Baseline	Treatment
																						Saline	1	0.879701
																						LCN2	1	0.727478
																						SEM SALINE	0.0956396	0.064541
																						SEM LCN2	0.0406943	0.0500432

## Sheet: autoradiography 
Human													Baboon
Brain Region	Total Binding	Non-Specific Binding (1 µM LCN2)	Specific Binding	Percent Specific Binding									Brain Region	Total Binding	Non-Specific Binding (1 µM LCN2)	Specific Binding	Percent Specific Binding
Hypothalamus	1132.15	986.7	145.45	12.8472									Hypothalamus	1323.93	1095.36	228.569	17.1296
PVN	1268.32	1001.04	267.28	21.0735									PVN	1392.39	1179.59	212.803	15.1536
Blank	86.86	133.78	-46.92	-54.018									Blank	29.65	25.35	4.3	8.77043
	Non-Specific Binding (1 µM LCN2)	Specific Binding												Non-Specific Binding (1 µM LCN2)	Specific Binding
Hypothalamus	986.7	145.45											Hypothalamus	1095.36	228.569
PVN	1001.04	267.28											PVN	1179.59	212.803

## Sheet: Blandine's obese
	0	30	60	120		Time (min)	0	30	60	120
	67.88	53.43	49.17	58.04		LCN2(ng/mL)	57.4067	48.2833	50.1967	45.2767
	56.43	55.48	53.92	38.51		sem	5.78549	6.19997	1.92307	6.38554
	47.91	35.94	47.5	39.28
		0.158924	0.338627	0.0532187
		0.342556	0.302459	0.231969

## Sheet: No chase PET subj 2065_2079
	This sheet contains:	RAW DATA FROM THE NO-CHASE EXPERIMENT (SUPPL. FIGURE 4, M)			0.25	0.75	1.5	2.5	3.5	5	7	9	11	13	16	20	24	28	35	45	55	65	75	85	95	105	115	Time (min)			0.25	0.75	1.5	2.5	3.5	5	7	9	11	13	16	20	24	28	35	45	55	65	75
		Monkey 2065	1	2065	1	2	3	4	5	6	7	8	9	10	11	12	13	14	15	16	17	18	19	20	21	22	23	Monkey 2079	1	2079	1	2	3	4	5	6	7	8	9	10	11	12	13	14	15	16	17	18	19
			101	l_abducens_nucleus - [g/ml{SUVbw}]	0.145856	0.196079	0.183643	0.100234	0.180958	0.147939	0.176176	0.25071	0.170021	0.204573	0.142309	0.134828	0.0837763	0.147249	0.102321	0.103911	0.102032	0.094483	0.0905758	0.109611	0.118724	0.111513	0.0981453		99	l_abducens_nucleus - [g/ml{SUVbw}]	0.63429	0.37932	0.523389	0.602611	0.540425	0.529649	0.516575	0.453583	0.552878	0.409125	0.365378	0.406478	0.358138	0.322983	0.305814	0.324177	0.273238	0.314773	0.27725
			283	l_accessory_basal_nucleus_of_the_amygdala - [g/ml{SUVbw}]	0.5471	0.630726	0.58406	0.312769	0.394168	0.296485	0.247734	0.284585	0.232002	0.252186	0.20985	0.170056	0.189733	0.182953	0.210173	0.168357	0.151496	0.146677	0.18377	0.179612	0.207539	0.18686	0.172941		277	l_accessory_basal_nucleus_of_the_amygdala - [g/ml{SUVbw}]	0.652196	0.600837	0.565297	0.704854	0.622271	0.631732	0.58082	0.58754	0.511899	0.488924	0.492446	0.456232	0.422626	0.43902	0.389939	0.353328	0.351093	0.356118	0.389834
			47	l_accessory_cuneate_nucleus - [g/ml{SUVbw}]	0.24691	0.217082	0.265113	0.186517	0.266814	0.244845	0.158352	0.131222	0.0926675	0.148105	0.155155	0.136189	0.128596	0.104237	0.12558	0.116948	0.11424	0.098185	0.126135	0.115496	0.141122	0.128095	0.139358		47	l_accessory_cuneate_nucleus - [g/ml{SUVbw}]	1.20209	1.54216	1.27765	1.34218	1.19351	1.2957	1.12163	1.23882	1.15226	0.906519	1.02001	0.948971	0.885239	0.806004	0.703097	0.648929	0.619858	0.585919	0.617672
			365	l_alar_central_lobule - [g/ml{SUVbw}]	0.50924	0.485404	0.315697	0.26513	0.182771	0.392442	0.284111	0.23105	0.264423	0.24719	0.239498	0.196473	0.141574	0.198227	0.148564	0.148489	0.156979	0.13561	0.141101	0.124414	0.13099	0.12637	0.161183		1199	l_accessory_cuneate_nucleus_wm - [g/ml{SUVbw}]	1.57699	1.98455	1.60171	1.524	1.50784	1.51471	1.35211	1.49799	1.44175	1.07151	1.16755	1.17438	1.0279	0.969701	0.83991	0.774378	0.686359	0.692271	0.696989
			147	l_alveus - [g/ml{SUVbw}]	0.282677	0.202466	0.250289	0.250569	0.255112	0.172356	0.207137	0.20819	0.173031	0.171674	0.150881	0.139286	0.137898	0.121771	0.141012	0.131277	0.1211	0.132933	0.127566	0.150717	0.136821	0.144427	0.140219		355	l_alar_central_lobule - [g/ml{SUVbw}]	0.724039	0.345071	0.497865	0.50849	0.380378	0.384196	0.370215	0.436244	0.348676	0.341713	0.298028	0.348017	0.251192	0.240913	0.214202	0.213774	0.175791	0.192286	0.181173
			579	l_amygdala_-_not_otherwise_specified - [g/ml{SUVbw}]	0.478086	0.330357	0.348174	0.304753	0.309336	0.259952	0.27656	0.292769	0.324964	0.201908	0.235591	0.188574	0.193302	0.232776	0.180013	0.175939	0.167125	0.189392	0.191303	0.178612	0.21837	0.18025	0.214525		143	l_alveus - [g/ml{SUVbw}]	0.360524	0.320265	0.309909	0.366731	0.344735	0.343071	0.304634	0.283421	0.306799	0.270716	0.278418	0.261597	0.231637	0.237295	0.200344	0.197114	0.191145	0.194671	0.204951
			533	l_amygdalohippocampal_area - [g/ml{SUVbw}]	0.419846	0.470184	0.530712	0.328547	0.332012	0.289184	0.201361	0.205856	0.200516	0.203521	0.187755	0.164769	0.158615	0.132171	0.185797	0.159337	0.140552	0.12929	0.15492	0.142813	0.139704	0.160924	0.146539		555	l_amygdala_-_not_otherwise_specified - [g/ml{SUVbw}]	0.749976	0.496156	0.573716	0.62982	0.700401	0.628953	0.552544	0.552826	0.493378	0.467813	0.569689	0.422493	0.435749	0.400321	0.421147	0.372111	0.410505	0.388982	0.402378
			555	l_amygdalopiriform_transition_area - [g/ml{SUVbw}]	0.685304	0.361666	0.431736	0.38475	0.40971	0.284647	0.33665	0.32232	0.352126	0.199702	0.260505	0.21603	0.219493	0.288074	0.21672	0.222128	0.186424	0.235434	0.244822	0.225174	0.278047	0.232793	0.259786		517	l_amygdalohippocampal_area - [g/ml{SUVbw}]	0.782458	0.572737	0.547154	0.648852	0.46105	0.548089	0.491294	0.499654	0.456048	0.427142	0.417709	0.433979	0.364527	0.384706	0.329343	0.294388	0.297498	0.297579	0.318654
			17	l_angular_gyrus (1) - [g/ml{SUVbw}]	0.289332	0.261934	0.242217	0.256151	0.207908	0.198738	0.204113	0.194618	0.149854	0.195156	0.152517	0.174897	0.157631	0.165406	0.160235	0.145484	0.170876	0.155866	0.171245	0.189515	0.181156	0.18369	0.19477		535	l_amygdalopiriform_transition_area - [g/ml{SUVbw}]	0.684413	0.544415	0.615618	0.651722	0.635306	0.631614	0.566316	0.585619	0.51152	0.469056	0.580716	0.468118	0.474943	0.430936	0.454301	0.399972	0.455242	0.427549	0.44163
			1191	l_angular_gyrus (2) - [g/ml{SUVbw}]	0.289332	0.261934	0.242217	0.256151	0.207908	0.198738	0.204113	0.194618	0.149854	0.195156	0.152517	0.174897	0.157631	0.165406	0.160235	0.145484	0.170876	0.155866	0.171245	0.189515	0.181156	0.18369	0.19477		17	l_angular_gyrus (1) - [g/ml{SUVbw}]	0.514325	0.29515	0.325917	0.334483	0.26265	0.27888	0.289999	0.259519	0.274828	0.244874	0.230766	0.214023	0.205153	0.191696	0.171133	0.161406	0.163075	0.15885	0.154373
			13	l_annectant_gyrus_macaque (1) - [g/ml{SUVbw}]	0.25839	0.24142	0.353826	0.267819	0.254839	0.27705	0.268851	0.236666	0.190619	0.24562	0.172521	0.215128	0.161101	0.175523	0.158895	0.151498	0.156318	0.143412	0.142701	0.159559	0.167931	0.167657	0.152451		1149	l_angular_gyrus (2) - [g/ml{SUVbw}]	0.514325	0.29515	0.325917	0.334483	0.26265	0.27888	0.289999	0.259519	0.274828	0.244874	0.230766	0.214023	0.205153	0.191696	0.171133	0.161406	0.163075	0.15885	0.154373
			1187	l_annectant_gyrus_macaque (2) - [g/ml{SUVbw}]	0.25839	0.24142	0.353826	0.267819	0.254839	0.27705	0.268851	0.236666	0.190619	0.24562	0.172521	0.215128	0.161101	0.175523	0.158895	0.151498	0.156318	0.143412	0.142701	0.159559	0.167931	0.167657	0.152451		1169	l_angular_gyrus_wm (1) - [g/ml{SUVbw}]	0.483074	0.287766	0.302379	0.31908	0.24396	0.271595	0.271497	0.247643	0.264011	0.233362	0.219669	0.204871	0.191849	0.182497	0.159478	0.154456	0.154584	0.152647	0.146417
			557	l_anterior_amygdalar_area - [g/ml{SUVbw}]	0.358615	0.416604	0.373276	0.25779	0.238897	0.23928	0.224569	0.296297	0.27387	0.252623	0.191334	0.142855	0.158385	0.170748	0.159578	0.156612	0.137583	0.153146	0.151094	0.155472	0.186243	0.146032	0.171357		13	l_annectant_gyrus_macaque (1) - [g/ml{SUVbw}]	0.422314	0.269319	0.264756	0.278893	0.236215	0.239204	0.257401	0.23787	0.220913	0.188126	0.194942	0.1693	0.175058	0.14587	0.13351	0.125968	0.119934	0.119895	0.11658
			273	l_anterior_cingulate_gyrus - [g/ml{SUVbw}]	0.217038	0.310547	0.197213	0.201905	0.204082	0.206744	0.176213	0.172144	0.19652	0.17809	0.162073	0.185155	0.154429	0.139105	0.145809	0.152901	0.17217	0.16213	0.187567	0.190806	0.197156	0.220465	0.203776		1145	l_annectant_gyrus_macaque (2) - [g/ml{SUVbw}]	0.422314	0.269319	0.264756	0.278893	0.236215	0.239204	0.257401	0.23787	0.220913	0.188126	0.194942	0.1693	0.175058	0.14587	0.13351	0.125968	0.119934	0.119895	0.11658
			307	l_anterior_column_of_the_fornix - [g/ml{SUVbw}]	0.293287	0.058235	0.221981	0.149586	0.22697	0.19942	0.264402	0.192723	0.179517	0.169829	0.113056	0.0891523	0.0958871	0.148502	0.110933	0.107199	0.0741583	0.0902892	0.099012	0.0964622	0.0913211	0.107724	0.108287		1165	l_annectant_gyrus_macaque_wm (1) - [g/ml{SUVbw}]	0.406329	0.258118	0.250368	0.269371	0.233395	0.241238	0.248039	0.235909	0.226546	0.189108	0.195126	0.171708	0.173014	0.152854	0.134815	0.128844	0.1234	0.13264	0.123368
			303	l_anterior_commissure - [g/ml{SUVbw}]	0.147115	0.136369	0.196042	0.145978	0.336706	0.234197	0.173993	0.175112	0.171324	0.151183	0.15294	0.0738698	0.081862	0.122441	0.101772	0.12956	0.0810392	0.0981341	0.106722	0.117833	0.105237	0.125147	0.115684		537	l_anterior_amygdalar_area - [g/ml{SUVbw}]	0.739166	0.490016	0.542988	0.561379	0.697596	0.596163	0.516579	0.53516	0.445492	0.444185	0.502332	0.369048	0.380574	0.374251	0.357111	0.328889	0.34087	0.325774	0.332623
			51	l_anterior_corticospinal_tract_of_the_medulla - [g/ml{SUVbw}]	0.690635	0.484964	0.651291	0.564822	0.50076	0.376735	0.425271	0.35101	0.233195	0.29117	0.248575	0.305997	0.303712	0.249464	0.254429	0.255195	0.296427	0.282876	0.310156	0.268166	0.298023	0.300278	0.321653		267	l_anterior_cingulate_gyrus - [g/ml{SUVbw}]	0.443904	0.352945	0.345129	0.300757	0.320897	0.291735	0.300116	0.286837	0.276372	0.267891	0.231317	0.235007	0.216606	0.193992	0.175966	0.153824	0.158797	0.150896	0.1589
			309	l_anterior_part_of_the_anterior_commissure - [g/ml{SUVbw}]	0.176904	0.2259	0.149628	0.150055	0.123697	0.211476	0.113075	0.221469	0.163299	0.191651	0.23448	0.0960523	0.186054	0.119309	0.109728	0.102552	0.145211	0.14428	0.156342	0.156881	0.191382	0.187612	0.162815		297	l_anterior_commissure - [g/ml{SUVbw}]	0.586289	0.486167	0.535904	0.291855	0.620936	0.418758	0.386449	0.359267	0.334162	0.334608	0.322346	0.323074	0.321081	0.29225	0.238477	0.207035	0.228284	0.224175	0.249224
			363	l_anterior_quadrangular_lobule - [g/ml{SUVbw}]	0.319112	0.310036	0.375026	0.338277	0.263769	0.288088	0.222578	0.185463	0.236528	0.163224	0.198948	0.14697	0.140431	0.138006	0.140295	0.125013	0.136105	0.132981	0.14014	0.136131	0.130546	0.131156	0.139152		301	l_anterior_part_of_the_anterior_commissure - [g/ml{SUVbw}]	0.601729	0.754401	0.419918	0.482071	0.536052	0.494098	0.421222	0.396311	0.394657	0.408126	0.382093	0.290681	0.345295	0.308915	0.282527	0.290788	0.302702	0.331246	0.326271
			269	l_anterodorsal_nucleus_of_the_thalamus - [g/ml{SUVbw}]	0.129324	0.091182	0.173516	0.121292	0.157223	0.162305	0.162869	0.142597	0.203233	0.169055	0.0788232	0.128933	0.107173	0.151996	0.0884462	0.0897046	0.0907981	0.0841731	0.10104	0.116137	0.0960026	0.102081	0.118223		353	l_anterior_quadrangular_lobule - [g/ml{SUVbw}]	0.645937	0.372374	0.389328	0.411055	0.36752	0.322901	0.299935	0.306833	0.271487	0.270186	0.24996	0.250339	0.226517	0.202496	0.18054	0.156853	0.163375	0.166719	0.160965
			267	l_anteromedial_nucleus_of_the_thalamus - [g/ml{SUVbw}]	0.173341	0.0718079	0.185049	0.149325	0.195315	0.177432	0.204997	0.166817	0.192336	0.162796	0.0953675	0.127816	0.0992996	0.164893	0.098837	0.104195	0.0883085	0.0901186	0.110223	0.118822	0.0968881	0.104157	0.132285		263	l_anterodorsal_nucleus_of_the_thalamus - [g/ml{SUVbw}]	0.471639	0.240783	0.319471	0.271108	0.321987	0.26714	0.24787	0.26628	0.253034	0.237132	0.214253	0.197183	0.184996	0.146199	0.171265	0.128867	0.132458	0.107333	0.129747
			449	l_anteroventral_cochlear_nucleus - [g/ml{SUVbw}]	0.270833	0.382519	0.495191	0.4184	0.259467	0.255874	0.259456	0.300144	0.273991	0.190298	0.220596	0.247495	0.195094	0.137564	0.159063	0.189799	0.157353	0.168499	0.211756	0.169812	0.19358	0.210458	0.207148		261	l_anteromedial_nucleus_of_the_thalamus - [g/ml{SUVbw}]	0.59154	0.258805	0.320845	0.261775	0.32296	0.290299	0.296156	0.255254	0.256297	0.243127	0.227215	0.209623	0.193502	0.149559	0.171392	0.131916	0.128181	0.110579	0.138783
			253	l_anteroventral_nucleus_of_the_thalamus - [g/ml{SUVbw}]	0.148166	0.126557	0.15788	0.114549	0.137153	0.149413	0.133132	0.122166	0.173202	0.149534	0.0760934	0.118475	0.109271	0.133602	0.0836168	0.0856612	0.0944323	0.0819819	0.101635	0.114776	0.0975076	0.0969373	0.109305		243	l_anteroventral_nucleus_of_the_thalamus - [g/ml{SUVbw}]	0.445722	0.214764	0.314444	0.2673	0.295337	0.262534	0.233332	0.267807	0.233841	0.224577	0.207116	0.19384	0.17802	0.138382	0.16686	0.125639	0.127853	0.105702	0.124951
			409	l_area_postrema - [g/ml{SUVbw}]	0.202695	0.167313	0.286956	0.23551	0.194316	0.172442	0.158493	0.147744	0.091521	0.163814	0.1098	0.129386	0.119065	0.102206	0.12473	0.111415	0.112977	0.102609	0.10563	0.108652	0.149482	0.126916	0.131971		439	l_ascending_fibers_of_the_facial_nerve - [g/ml{SUVbw}]	0.654042	0.405644	0.59264	0.680077	0.582216	0.571521	0.561242	0.487501	0.633843	0.432199	0.390267	0.42607	0.39309	0.362742	0.327959	0.347172	0.294221	0.334837	0.297461
			553	l_basal_forebrain_nucleus - [g/ml{SUVbw}]	0.306967	0.435509	0.361583	0.202586	0.305944	0.270294	0.162667	0.237366	0.201659	0.242509	0.1982	0.118273	0.130601	0.124294	0.152279	0.159535	0.130467	0.130487	0.143011	0.174418	0.19332	0.170538	0.145669		533	l_basal_forebrain_nucleus - [g/ml{SUVbw}]	0.824165	0.715803	0.629888	0.61694	0.773616	0.62278	0.544041	0.575282	0.550393	0.528091	0.488652	0.46988	0.41552	0.428285	0.36142	0.350577	0.354275	0.356128	0.396924
			285	l_basal_nucleus_of_the_amygdala - [g/ml{SUVbw}]	0.380989	0.391669	0.365585	0.240922	0.288106	0.254631	0.285994	0.268342	0.207002	0.216876	0.214742	0.17268	0.175774	0.181196	0.184313	0.146514	0.146892	0.156442	0.17291	0.173204	0.190343	0.179151	0.170274		279	l_basal_nucleus_of_the_amygdala - [g/ml{SUVbw}]	0.5331	0.52258	0.558014	0.625848	0.666951	0.61846	0.54949	0.541053	0.523426	0.499496	0.526807	0.457284	0.440048	0.4308	0.405438	0.365321	0.370601	0.369035	0.385309
			371	l_biventer_lobule - [g/ml{SUVbw}]	0.349885	0.323448	0.326963	0.214521	0.329332	0.308426	0.206597	0.162602	0.178143	0.159923	0.17553	0.158803	0.155336	0.123069	0.134408	0.12655	0.129916	0.130442	0.163305	0.15249	0.132685	0.148425	0.158232		361	l_biventer_lobule - [g/ml{SUVbw}]	1.52561	1.11895	0.90599	0.911202	1.02545	0.932402	0.818623	0.919992	0.856618	0.679521	0.801676	0.739254	0.714245	0.601856	0.592275	0.557262	0.571605	0.595529	0.627435
			205	l_body_of_the_corpus_callosum - [g/ml{SUVbw}]	0.220987	0.18	0.224399	0.194498	0.0946092	0.154773	0.134691	0.16319	0.155589	0.132983	0.112459	0.1275	0.116938	0.113608	0.0933119	0.0966242	0.104663	0.0808358	0.107665	0.106679	0.095544	0.116321	0.0910426		195	l_body_of_the_corpus_callosum - [g/ml{SUVbw}]	0.536951	0.289293	0.327665	0.348007	0.348676	0.275124	0.281776	0.309635	0.331199	0.278355	0.241596	0.217106	0.2235	0.192348	0.180915	0.148817	0.154854	0.137562	0.141421
			257	l_body_of_the_fornix - [g/ml{SUVbw}]	0.181303	0.0965787	0.189225	0.134559	0.156897	0.163611	0.193853	0.143992	0.198996	0.163914	0.0810274	0.115772	0.109411	0.139229	0.0929254	0.0884759	0.0879631	0.082251	0.0954335	0.115354	0.0943837	0.104939	0.112845		251	l_body_of_the_fornix - [g/ml{SUVbw}]	0.483246	0.257719	0.307913	0.274704	0.320839	0.276942	0.282088	0.267588	0.25629	0.24206	0.21166	0.201356	0.199787	0.163801	0.174191	0.130805	0.132094	0.113018	0.137746
			121	l_body_of_the_lateral_ventricle - [g/ml{SUVbw}]	0.132287	0.114685	0.167807	0.28663	0.12792	0.161382	0.166784	0.165319	0.133948	0.140641	0.100228	0.0923146	0.122711	0.0980114	0.0887634	0.0901361	0.102674	0.101423	0.104553	0.101114	0.10201	0.109158	0.11498		117	l_body_of_the_lateral_ventricle - [g/ml{SUVbw}]	0.436105	0.20818	0.2345	0.297049	0.295028	0.265585	0.230682	0.24283	0.218824	0.227305	0.192744	0.180026	0.174381	0.158962	0.151438	0.127924	0.122982	0.124315	0.131549
			169	l_brachium_of_the_superior_colliculus - [g/ml{SUVbw}]	0.257195	0.142197	0.111165	0.319468	0.234651	0.114929	0.187826	0.174595	0.157969	0.137521	0.165599	0.105524	0.0778477	0.154168	0.108164	0.114957	0.097005	0.121588	0.120169	0.116867	0.100993	0.0986485	0.10536		519	l_CA1_field - [g/ml{SUVbw}]	0.589893	0.360172	0.46804	0.480865	0.313803	0.369183	0.381155	0.376978	0.37284	0.330352	0.301598	0.359049	0.308933	0.311187	0.252737	0.219412	0.223724	0.226731	0.240526
			535	l_CA1_field - [g/ml{SUVbw}]	0.367727	0.386196	0.346089	0.392558	0.314028	0.269733	0.201482	0.167786	0.240447	0.20877	0.169006	0.1989	0.141474	0.101231	0.161398	0.145335	0.138758	0.130314	0.147985	0.128722	0.128293	0.151104	0.135755		181	l_capsule_of_the_medial_geniculate_body - [g/ml{SUVbw}]	0.654116	0.530249	0.302943	0.34792	0.318261	0.416751	0.328367	0.330549	0.317424	0.294781	0.242972	0.232969	0.255317	0.209907	0.198572	0.183996	0.141718	0.159292	0.167713
			571	l_callosal_sulcus - [g/ml{SUVbw}]	0.0843207	0.612589	0.313864	0.113048	0.138111	0.145555	0.106201	0.16412	0.134421	0.0873097	0.114769	0.193622	0.121079	0.109288	0.105636	0.132892	0.147322	0.107525	0.119462	0.118903	0.118872	0.13461	0.126988		27	l_caudal_part_of_the_spinal_trigeminal_nucleus - [g/ml{SUVbw}]	0.576671	1.12585	1.21902	1.33982	1.23904	1.25767	1.16635	1.08634	1.11919	0.980974	1.05271	1.01561	0.889309	0.796855	0.699827	0.626637	0.592847	0.585949	0.627766
			187	l_capsule_of_the_medial_geniculate_body - [g/ml{SUVbw}]	0.409512	0.148811	0.10409	0.279937	0.290111	0.129602	0.182182	0.18756	0.188211	0.135272	0.183711	0.118018	0.0805855	0.169939	0.113596	0.113184	0.0968748	0.120821	0.127411	0.11358	0.101513	0.0986577	0.112231		1179	l_caudal_part_of_the_spinal_trigeminal_nucleus_wm - [g/ml{SUVbw}]	0.494451	0.875592	1.06732	1.08568	1.09933	1.03971	0.998689	0.923326	0.93632	0.86431	0.882738	0.868764	0.789786	0.707458	0.631607	0.562216	0.559196	0.549161	0.616953
			27	l_caudal_part_of_the_spinal_trigeminal_nucleus - [g/ml{SUVbw}]	0.278518	0.188656	0.371746	0.253295	0.411326	0.243127	0.203407	0.148107	0.132948	0.1739	0.182451	0.159412	0.142274	0.126586	0.14336	0.156919	0.174935	0.161624	0.179536	0.196137	0.212182	0.210585	0.220355		473	l_caudal_pontine_reticular_nucleus - [g/ml{SUVbw}]	0.70884	0.418424	0.439473	0.486687	0.434469	0.404244	0.394936	0.42576	0.36352	0.36759	0.307471	0.374841	0.251944	0.262137	0.256946	0.253675	0.231166	0.267821	0.238994
			491	l_caudal_pontine_reticular_nucleus - [g/ml{SUVbw}]	0.239936	0.217861	0.20054	0.147179	0.210785	0.210508	0.202416	0.29584	0.204647	0.181741	0.16618	0.146812	0.134877	0.134856	0.104602	0.112844	0.105315	0.0981779	0.103442	0.108371	0.113134	0.112451	0.113446		131	l_caudate_nucleus - [g/ml{SUVbw}]	0.371383	0.317475	0.288614	0.268448	0.262363	0.283911	0.258642	0.2531	0.229633	0.242577	0.202852	0.198056	0.191358	0.168422	0.161685	0.148142	0.145842	0.150258	0.161432
			135	l_caudate_nucleus - [g/ml{SUVbw}]	0.179207	0.228354	0.224046	0.132766	0.119663	0.166097	0.123989	0.184416	0.142567	0.140397	0.112587	0.107645	0.112086	0.1143	0.101396	0.089385	0.103794	0.100017	0.118771	0.115015	0.112505	0.127256	0.114523		529	l_central_amygdalar_nucleus - [g/ml{SUVbw}]	0.61686	0.433715	0.467755	0.414801	0.508351	0.439602	0.406782	0.437391	0.364044	0.363241	0.328642	0.312155	0.300691	0.31058	0.247749	0.239872	0.234512	0.222033	0.238088
			545	l_central_amygdalar_nucleus - [g/ml{SUVbw}]	0.236876	0.336322	0.314471	0.234969	0.162209	0.208397	0.188073	0.235036	0.199241	0.226981	0.153325	0.120747	0.119921	0.104641	0.141568	0.135422	0.105729	0.111336	0.105313	0.134299	0.139023	0.118146	0.110678		35	l_central_gray_of_the_medulla - [g/ml{SUVbw}]	0.438432	0.635249	0.757176	0.731964	0.922102	0.821774	0.812063	0.729849	0.7331	0.682775	0.699687	0.596228	0.564485	0.57814	0.541877	0.435324	0.464795	0.47209	0.527982
			35	l_central_gray_of_the_medulla - [g/ml{SUVbw}]	0.439786	0.244067	0.494391	0.398313	0.315704	0.23675	0.231937	0.235663	0.186403	0.194941	0.170027	0.178689	0.183824	0.158748	0.158526	0.173124	0.178994	0.171431	0.192285	0.181294	0.207467	0.19372	0.221563		1187	l_central_gray_of_the_medulla_wm - [g/ml{SUVbw}]	0.419646	0.626344	0.802671	0.768648	0.906594	0.838173	0.827524	0.742178	0.735407	0.706937	0.708295	0.621057	0.585794	0.597113	0.550045	0.449693	0.48417	0.493302	0.551134
			181	l_central_gray_of_the_midbrain - [g/ml{SUVbw}]	0.407277	0.371655	0.288896	0.212611	0.330156	0.278205	0.241097	0.188578	0.250311	0.185142	0.165527	0.171683	0.1593	0.12654	0.127728	0.145743	0.134271	0.115808	0.156578	0.114743	0.138072	0.132394	0.1251		175	l_central_gray_of_the_midbrain - [g/ml{SUVbw}]	0.539101	0.353549	0.349057	0.340013	0.355143	0.314069	0.334373	0.321179	0.249858	0.289455	0.256374	0.223623	0.212173	0.174644	0.182379	0.166861	0.141093	0.154958	0.157446
			481	l_central_gray_of_the_pons - [g/ml{SUVbw}]	0.184019	0.239309	0.208476	0.163858	0.222727	0.193465	0.193859	0.268451	0.178786	0.216211	0.167733	0.152182	0.11917	0.146321	0.11301	0.113815	0.116225	0.101199	0.100855	0.111028	0.129574	0.112332	0.108688		463	l_central_gray_of_the_pons - [g/ml{SUVbw}]	0.57974	0.325262	0.377614	0.477952	0.406743	0.391714	0.398985	0.363579	0.393549	0.335197	0.290042	0.320961	0.24843	0.232013	0.226737	0.249913	0.201606	0.236179	0.199231
			427	l_central_lateral_nucleus - [g/ml{SUVbw}]	0.252564	0.185344	0.107778	0.255164	0.0830989	0.117649	0.118487	0.080881	0.131257	0.0896821	0.083573	0.121427	0.108443	0.0999031	0.0878353	0.102736	0.120084	0.0742383	0.118446	0.133664	0.110914	0.102497	0.119933		415	l_central_lateral_nucleus - [g/ml{SUVbw}]	0.419928	0.198682	0.292396	0.330802	0.312742	0.240254	0.212426	0.26302	0.233168	0.225938	0.203908	0.184297	0.160464	0.14039	0.165908	0.132672	0.133027	0.115185	0.116311
			583	l_central_nucleus_of_the_inferior_colliculus - [g/ml{SUVbw}]	0.392377	0.479384	0.426569	0.202554	0.393959	0.315744	0.239558	0.21374	0.289033	0.265922	0.184122	0.189979	0.200329	0.162311	0.145187	0.170821	0.150664	0.143129	0.168168	0.125488	0.147628	0.141135	0.145421		561	l_central_nucleus_of_the_inferior_colliculus - [g/ml{SUVbw}]	0.63182	0.436809	0.406471	0.429629	0.364123	0.33582	0.348294	0.409996	0.322011	0.349716	0.292875	0.290741	0.236688	0.205611	0.203083	0.203311	0.15858	0.174729	0.171614
			433	l_central_tegmental_tract - [g/ml{SUVbw}]	0.182136	0.186625	0.242855	0.171857	0.217161	0.198546	0.209026	0.243289	0.246974	0.186113	0.160788	0.151921	0.13588	0.135011	0.115311	0.116333	0.113789	0.120847	0.128972	0.127729	0.140763	0.142299	0.137741		421	l_central_tegmental_tract - [g/ml{SUVbw}]	0.649626	0.466719	0.470722	0.517351	0.522809	0.497493	0.504375	0.427246	0.476211	0.405138	0.365377	0.404136	0.315084	0.282356	0.289073	0.300992	0.265545	0.318546	0.270582
			425	l_centromedian_nucleus - [g/ml{SUVbw}]	0.218163	0.0866152	0.132746	0.232948	0.199582	0.214238	0.148485	0.137068	0.134041	0.0705085	0.154811	0.107007	0.0988958	0.0954161	0.103132	0.0984402	0.0992526	0.0939629	0.11954	0.0940731	0.107553	0.0771258	0.0878407		357	l_cerebellar_tonsil - [g/ml{SUVbw}]	0.407338	0.191611	0.320925	0.329981	0.286501	0.241161	0.30032	0.263305	0.298874	0.274759	0.227882	0.24609	0.23078	0.214594	0.234447	0.247224	0.255376	0.274584	0.344143
			367	l_cerebellar_tonsil - [g/ml{SUVbw}]	0.547475	0.347136	0.370541	0.174438	0.213971	0.185314	0.225126	0.26102	0.195959	0.160937	0.146508	0.157763	0.15715	0.156699	0.160135	0.153405	0.16888	0.155975	0.166452	0.141287	0.179369	0.155038	0.173992		343	l_cerebellar_white_matter - [g/ml{SUVbw}]	0.66661	0.480908	0.47871	0.420387	0.430028	0.404909	0.383615	0.383539	0.368615	0.344251	0.345833	0.311641	0.30008	0.282004	0.251557	0.245077	0.254121	0.255553	0.27236
			353	l_cerebellar_white_matter - [g/ml{SUVbw}]	0.344557	0.356144	0.34637	0.280715	0.292875	0.292713	0.245454	0.202901	0.228988	0.208413	0.188208	0.168302	0.165617	0.173214	0.144558	0.138809	0.152911	0.135204	0.145964	0.140666	0.138446	0.147509	0.148018		399	l_cerebellomedullary_cistern - [g/ml{SUVbw}]	1.59142	1.29518	1.18887	1.23808	1.13873	1.16393	1.00679	1.16184	1.08486	0.824838	0.876799	0.887713	0.80015	0.741708	0.654876	0.620099	0.570138	0.574859	0.562836
			407	l_cerebellomedullary_cistern - [g/ml{SUVbw}]	0.226268	0.268117	0.225717	0.18304	0.346414	0.341568	0.1701	0.133749	0.102587	0.165375	0.184992	0.170429	0.137683	0.116993	0.126773	0.11136	0.112091	0.100978	0.130161	0.126525	0.136104	0.116799	0.139103		173	l_cerebral_aqueduct - [g/ml{SUVbw}]	0.49606	0.313116	0.318751	0.291985	0.344569	0.303088	0.325226	0.309293	0.229115	0.270264	0.233466	0.198487	0.197098	0.162282	0.168407	0.15829	0.135456	0.148109	0.14846
			179	l_cerebral_aqueduct - [g/ml{SUVbw}]	0.404399	0.321813	0.288049	0.237832	0.28474	0.2961	0.267633	0.181633	0.252556	0.189854	0.160639	0.172357	0.161201	0.11882	0.124338	0.129616	0.130232	0.110961	0.157572	0.109861	0.132605	0.131981	0.107569		91	l_cerebral_white_matter - [g/ml{SUVbw}]	0.363682	0.296375	0.293112	0.297808	0.276533	0.257537	0.254954	0.232431	0.22645	0.228738	0.214503	0.19745	0.187032	0.171658	0.157258	0.144491	0.138866	0.142765	0.141693
			91	l_cerebral_white_matter - [g/ml{SUVbw}]	0.224431	0.184096	0.222041	0.219978	0.201425	0.179515	0.185942	0.180649	0.163545	0.150698	0.15326	0.13484	0.135964	0.133888	0.136568	0.13695	0.147224	0.143568	0.15659	0.15648	0.157118	0.163872	0.167086		299	l_claustral_amygdalar_area - [g/ml{SUVbw}]	0.727744	0.424727	0.476925	0.464216	0.653015	0.539165	0.456478	0.414921	0.424366	0.407826	0.466797	0.348369	0.329837	0.325859	0.304653	0.309616	0.338079	0.299826	0.313017
			305	l_claustral_amygdalar_area - [g/ml{SUVbw}]	0.270083	0.244248	0.192259	0.210222	0.203773	0.311664	0.234457	0.255445	0.25613	0.220659	0.220681	0.196756	0.18026	0.149574	0.127965	0.137324	0.142174	0.131804	0.141185	0.137987	0.15865	0.121566	0.155941		229	l_claustrum - [g/ml{SUVbw}]	0.678626	0.450052	0.434383	0.429986	0.455063	0.423079	0.393372	0.374815	0.371936	0.344759	0.362249	0.304042	0.310548	0.273255	0.255968	0.255007	0.275499	0.261655	0.266382
			235	l_claustrum - [g/ml{SUVbw}]	0.365921	0.282021	0.254197	0.279604	0.259676	0.242088	0.227225	0.229943	0.213949	0.18798	0.205126	0.173165	0.180012	0.146937	0.133406	0.140154	0.15461	0.147288	0.149949	0.153146	0.166665	0.140303	0.171158		433	l_cochlear_nerve - [g/ml{SUVbw}]	1.08689	1.14374	0.770687	0.7628	0.98561	1.01872	0.751071	0.850784	0.813518	0.706397	0.734271	0.684485	0.67987	0.603634	0.567427	0.572461	0.540203	0.600017	0.619655
			453	l_cochlear_nerve - [g/ml{SUVbw}]	0.280235	0.273616	0.370891	0.302273	0.310293	0.301353	0.214859	0.221513	0.223974	0.16972	0.198414	0.213021	0.175025	0.119626	0.140818	0.139982	0.128033	0.132364	0.187296	0.15844	0.151488	0.154344	0.171918		139	l_commissure_of_the_fornix - [g/ml{SUVbw}]	0.451936	0.27718	0.285179	0.346851	0.366451	0.28953	0.29648	0.291062	0.251339	0.261799	0.233763	0.210896	0.202684	0.171032	0.161633	0.145565	0.138206	0.142775	0.151143
			143	l_commissure_of_the_fornix - [g/ml{SUVbw}]	0.225545	0.253494	0.172281	0.334766	0.234512	0.228115	0.18048	0.247121	0.184241	0.138414	0.150261	0.130156	0.112427	0.131807	0.106876	0.13222	0.12877	0.135644	0.137807	0.127454	0.144159	0.146455	0.157722		115	l_commissure_of_the_inferior_colliculus - [g/ml{SUVbw}]	0.571521	0.404475	0.370721	0.361444	0.344772	0.314692	0.324055	0.364375	0.286164	0.335232	0.273377	0.240085	0.215501	0.179803	0.180505	0.174782	0.140371	0.14904	0.151095
			119	l_commissure_of_the_inferior_colliculus - [g/ml{SUVbw}]	0.412047	0.571543	0.496894	0.203968	0.472001	0.352954	0.248596	0.20776	0.28264	0.27846	0.188623	0.200354	0.201703	0.158467	0.161503	0.181695	0.16408	0.151132	0.18705	0.131711	0.154499	0.145592	0.152125		147	l_commissure_of_the_superior_colliculus - [g/ml{SUVbw}]	0.448395	0.29204	0.320463	0.287572	0.361779	0.27086	0.29793	0.310519	0.209618	0.24668	0.221114	0.179394	0.168131	0.150617	0.155133	0.136627	0.114762	0.123602	0.130018
			151	l_commissure_of_the_superior_colliculus - [g/ml{SUVbw}]	0.455338	0.502586	0.389689	0.237051	0.388012	0.380675	0.312709	0.180001	0.273761	0.218313	0.201594	0.205777	0.167056	0.14398	0.15164	0.178265	0.171245	0.131131	0.199438	0.14639	0.161974	0.152398	0.148167		553	l_crus_cerebri - [g/ml{SUVbw}]	1.24229	0.699581	0.649155	0.812178	0.654243	0.631556	0.644533	0.589204	0.552194	0.491842	0.542486	0.537147	0.489038	0.475345	0.40691	0.357287	0.372639	0.39284	0.405257
			577	l_crus_cerebri - [g/ml{SUVbw}]	0.368523	0.403705	0.346977	0.389181	0.343856	0.321422	0.257604	0.176089	0.236609	0.209204	0.171383	0.212323	0.153085	0.126571	0.161035	0.151753	0.155833	0.139152	0.170407	0.136134	0.127919	0.15258	0.159035		23	l_cuneate_fasciculus_of_the_medulla - [g/ml{SUVbw}]	0.667684	1.13605	1.24679	1.23735	1.11868	1.15227	1.09263	1.06655	1.07139	0.928411	1.01322	0.911334	0.884519	0.737434	0.671392	0.621169	0.586972	0.552174	0.632652
			23	l_cuneate_fasciculus_of_the_medulla - [g/ml{SUVbw}]	0.230148	0.133679	0.224272	0.275458	0.319402	0.246928	0.185179	0.141837	0.129199	0.129892	0.162624	0.134962	0.137187	0.122405	0.117477	0.135551	0.128801	0.125993	0.139685	0.144614	0.152509	0.151481	0.172328		1175	l_cuneate_fasciculus_of_the_medulla_wm - [g/ml{SUVbw}]	0.614874	1.02395	1.17625	1.16493	1.10823	1.08961	1.05986	1.00611	1.01771	0.900294	0.952037	0.878787	0.852994	0.726891	0.656341	0.601709	0.584181	0.554546	0.633441
			33	l_cuneate_nucleus_of_the_medulla - [g/ml{SUVbw}]	0.508584	0.318275	0.516482	0.439608	0.388645	0.279107	0.285784	0.256267	0.196606	0.211024	0.213109	0.214735	0.225145	0.1874	0.202351	0.201683	0.228397	0.223325	0.243266	0.223144	0.263704	0.253661	0.274111		33	l_cuneate_nucleus_of_the_medulla - [g/ml{SUVbw}]	0.67347	1.18296	1.16669	1.1713	1.06904	1.16811	1.02262	1.04909	1.0182	0.869656	0.992199	0.85894	0.83535	0.70591	0.640872	0.593427	0.561837	0.534217	0.605322
			231	l_cuneiform_nucleus - [g/ml{SUVbw}]	0.445907	0.347372	0.254317	0.168671	0.309875	0.221848	0.211688	0.258777	0.233472	0.192069	0.167824	0.163133	0.186317	0.150488	0.1171	0.137732	0.12309	0.115309	0.124976	0.112019	0.126132	0.122699	0.128483		1185	l_cuneate_nucleus_of_the_medulla_wm - [g/ml{SUVbw}]	0.608566	1.05831	1.09414	1.10371	1.06919	1.07965	0.995118	0.975141	0.964094	0.842917	0.919311	0.825448	0.800915	0.697044	0.630872	0.569998	0.558298	0.537526	0.610265
			9	l_cuneus (1) - [g/ml{SUVbw}]	0.364629	0.33764	0.353655	0.326526	0.277695	0.274511	0.268955	0.27648	0.250375	0.199306	0.224528	0.177207	0.174565	0.158367	0.151832	0.139931	0.144305	0.145788	0.150841	0.144691	0.146311	0.15527	0.148757		225	l_cuneiform_nucleus - [g/ml{SUVbw}]	0.698012	0.442575	0.403712	0.430245	0.406423	0.360665	0.383767	0.382566	0.320063	0.347024	0.300256	0.322523	0.265576	0.21788	0.23868	0.216945	0.175652	0.194287	0.205353
			1183	l_cuneus (2) - [g/ml{SUVbw}]	0.364629	0.33764	0.353655	0.326526	0.277695	0.274511	0.268955	0.27648	0.250375	0.199306	0.224528	0.177207	0.174565	0.158367	0.151832	0.139931	0.144305	0.145788	0.150841	0.144691	0.146311	0.15527	0.148757		9	l_cuneus (1) - [g/ml{SUVbw}]	0.509876	0.308645	0.339997	0.354019	0.295457	0.295119	0.281583	0.287181	0.263333	0.243616	0.229436	0.216691	0.197922	0.178433	0.164803	0.140279	0.142794	0.142464	0.136908
			347	l_declive - [g/ml{SUVbw}]	0.443898	0.374695	0.411593	0.425998	0.351187	0.330756	0.284161	0.31605	0.387188	0.214852	0.278091	0.235381	0.251635	0.155447	0.168344	0.194816	0.205375	0.172144	0.166568	0.168063	0.188289	0.188883	0.195874		1141	l_cuneus (2) - [g/ml{SUVbw}]	0.509876	0.308645	0.339997	0.354019	0.295457	0.295119	0.281583	0.287181	0.263333	0.243616	0.229436	0.216691	0.197922	0.178433	0.164803	0.140279	0.142794	0.142464	0.136908
			63	l_decussation_of_the_medial_lemniscus - [g/ml{SUVbw}]	0.412618	0.25001	0.651003	0.410232	0.407836	0.220071	0.246978	0.294423	0.173723	0.248353	0.181306	0.198501	0.203738	0.17986	0.167899	0.194602	0.213603	0.187783	0.223527	0.214752	0.219665	0.237106	0.221431		1161	l_cuneus_wm (1) - [g/ml{SUVbw}]	0.502692	0.284553	0.334693	0.332413	0.275178	0.288886	0.261661	0.268484	0.248922	0.23135	0.221312	0.205251	0.190659	0.171568	0.158308	0.138424	0.138425	0.136965	0.137083
			171	l_decussation_of_the_superior_cerebellar_peduncle - [g/ml{SUVbw}]	0.168581	0.378058	0.33121	0.212787	0.220215	0.163842	0.185807	0.223412	0.110739	0.128198	0.107458	0.162317	0.126058	0.140286	0.111733	0.108075	0.124742	0.106924	0.139134	0.108552	0.144849	0.123574	0.135214		337	l_declive - [g/ml{SUVbw}]	0.568429	0.360608	0.358931	0.297378	0.288136	0.280406	0.286591	0.269965	0.245787	0.218264	0.229155	0.200454	0.18552	0.202441	0.157334	0.150473	0.14869	0.138583	0.150451
			573	l_decussation_of_the_superior_medullary_velum - [g/ml{SUVbw}]	0.264179	0.293543	0.325158	0.190696	0.317361	0.205069	0.206542	0.247366	0.273912	0.208535	0.147454	0.162091	0.165354	0.137028	0.124653	0.126616	0.120748	0.115371	0.12719	0.10017	0.122125	0.122238	0.111597		63	l_decussation_of_the_medial_lemniscus - [g/ml{SUVbw}]	0.34662	0.49737	0.639127	0.686145	0.801795	0.820675	0.777075	0.694371	0.634785	0.664273	0.65867	0.557901	0.5134	0.546062	0.517682	0.403299	0.466995	0.46412	0.489797
			127	l_decussation_of_the_trochlear_nerve - [g/ml{SUVbw}]	0.298403	0.308417	0.350448	0.199067	0.336383	0.219579	0.214595	0.238138	0.274699	0.221437	0.153907	0.166804	0.173928	0.136801	0.129327	0.133292	0.125162	0.12082	0.137056	0.103599	0.12489	0.127048	0.116359		165	l_decussation_of_the_superior_cerebellar_peduncle - [g/ml{SUVbw}]	1.3133	0.826339	1.00272	0.908271	0.971535	0.725945	0.765078	0.745696	0.701217	0.69923	0.667361	0.67135	0.641893	0.554788	0.508735	0.42442	0.456682	0.480375	0.493323
			495	l_deep_mesencephalic_nucleus - [g/ml{SUVbw}]	0.402293	0.317364	0.192104	0.303679	0.342592	0.2861	0.222538	0.183097	0.287889	0.127652	0.196817	0.162311	0.109018	0.150888	0.124211	0.15734	0.134149	0.128374	0.158995	0.141483	0.139932	0.139829	0.150036		549	l_decussation_of_the_superior_medullary_velum - [g/ml{SUVbw}]	0.580985	0.345128	0.327142	0.338669	0.362549	0.35111	0.345377	0.34679	0.312249	0.343228	0.266828	0.274295	0.232151	0.19318	0.213905	0.210989	0.169873	0.184354	0.17872
			493	l_deep_white_layer_of_the_superior_colliculus - [g/ml{SUVbw}]	0.450708	0.587958	0.448124	0.190281	0.443878	0.325219	0.256397	0.191424	0.256765	0.254194	0.180918	0.193146	0.187235	0.14829	0.153047	0.185915	0.162884	0.139476	0.181921	0.133537	0.157111	0.149281	0.151288		123	l_decussation_of_the_trochlear_nerve - [g/ml{SUVbw}]	0.618394	0.379539	0.353252	0.390579	0.377853	0.353143	0.356492	0.36856	0.320721	0.341703	0.282845	0.296376	0.233471	0.203375	0.220393	0.215917	0.168123	0.183615	0.186707
			97	l_descending_fibers_of_the_facial_nerve - [g/ml{SUVbw}]	0.206854	0.217936	0.307792	0.23367	0.246297	0.221668	0.244612	0.277013	0.236754	0.209734	0.188268	0.191395	0.156749	0.160159	0.129198	0.141617	0.11849	0.133203	0.163768	0.148349	0.154527	0.171894	0.162106		477	l_deep_mesencephalic_nucleus - [g/ml{SUVbw}]	0.510543	0.36256	0.317049	0.357231	0.362502	0.298935	0.298077	0.300604	0.224113	0.23496	0.221268	0.189937	0.195638	0.171326	0.16568	0.146522	0.121597	0.141171	0.145796
			437	l_diffuse_reticular_nucleus - [g/ml{SUVbw}]	0.581022	0.355873	0.317043	0.286538	0.223105	0.332758	0.234902	0.407539	0.267343	0.143427	0.255248	0.183555	0.18221	0.154387	0.12877	0.129264	0.108676	0.116899	0.13742	0.114889	0.11268	0.120476	0.135996		475	l_deep_white_layer_of_the_superior_colliculus - [g/ml{SUVbw}]	0.557346	0.399087	0.37606	0.359677	0.351562	0.303027	0.322175	0.359104	0.27481	0.319336	0.271056	0.233053	0.212329	0.1751	0.180202	0.169801	0.137538	0.147777	0.155962
			457	l_dorsal_acoustic_stria - [g/ml{SUVbw}]	0.216034	0.250754	0.196857	0.183614	0.361978	0.314178	0.197592	0.166133	0.13448	0.228011	0.214274	0.195647	0.133748	0.150015	0.132703	0.113499	0.115867	0.103675	0.116868	0.13223	0.146249	0.109166	0.126973		97	l_descending_fibers_of_the_facial_nerve - [g/ml{SUVbw}]	0.903737	0.977511	0.813646	0.701583	0.866834	0.862459	0.796734	0.807092	0.718004	0.677506	0.594355	0.638983	0.560018	0.565472	0.518609	0.517849	0.513259	0.578677	0.563139
			99	l_dorsal_cochlear_nucleus - [g/ml{SUVbw}]	0.284357	0.226576	0.243201	0.223012	0.35997	0.363614	0.187061	0.159858	0.165784	0.184334	0.187573	0.198757	0.153772	0.121125	0.129329	0.11073	0.113341	0.108743	0.149589	0.142948	0.131356	0.110097	0.13925		423	l_diffuse_reticular_nucleus - [g/ml{SUVbw}]	0.811863	0.47652	0.481288	0.492015	0.431113	0.405582	0.385072	0.445558	0.343947	0.380358	0.304681	0.393366	0.268202	0.284056	0.266221	0.251133	0.23396	0.262818	0.253168
			77	l_dorsal_motor_nucleus_of_the_vagus_nerve - [g/ml{SUVbw}]	0.166506	0.142705	0.280971	0.234588	0.213077	0.14251	0.161806	0.167113	0.0890807	0.197543	0.123233	0.1304	0.115316	0.103373	0.123244	0.1081	0.11762	0.106818	0.107833	0.11119	0.155472	0.138478	0.126529		437	l_dorsal_acoustic_stria - [g/ml{SUVbw}]	1.0129	0.519789	0.693005	0.830823	0.540915	0.678381	0.568695	0.603408	0.699219	0.478187	0.469709	0.486594	0.402113	0.42844	0.361519	0.37934	0.334267	0.369854	0.321063
			463	l_dorsal_paragigantocellular_nucleus - [g/ml{SUVbw}]	0.134364	0.13589	0.217091	0.180539	0.234727	0.139744	0.151639	0.161772	0.0881642	0.207127	0.152882	0.138016	0.114568	0.118939	0.122802	0.101613	0.111187	0.101943	0.105458	0.113906	0.157846	0.129295	0.120607		75	l_dorsal_motor_nucleus_of_the_vagus_nerve - [g/ml{SUVbw}]	0.77796	0.914991	0.954488	0.908041	0.94634	0.884299	0.894006	0.834388	0.865825	0.712085	0.70841	0.704856	0.633718	0.655695	0.56282	0.509246	0.501792	0.49281	0.509691
			383	l_dorsal_raphe_nucleus - [g/ml{SUVbw}]	0.283531	0.305065	0.249124	0.211487	0.264852	0.169026	0.213804	0.160467	0.210941	0.174138	0.115435	0.132652	0.144944	0.100321	0.110361	0.100699	0.103331	0.102318	0.124036	0.0910057	0.113491	0.121592	0.0889528		447	l_dorsal_paragigantocellular_nucleus - [g/ml{SUVbw}]	0.732923	0.592903	0.803719	0.735546	0.751638	0.716497	0.697125	0.664034	0.70768	0.554051	0.534521	0.568143	0.516968	0.507438	0.44467	0.421456	0.386065	0.412735	0.400548
			471	l_dorsal_reticular_nucleus - [g/ml{SUVbw}]	0.385869	0.176323	0.378015	0.227123	0.35636	0.182888	0.173932	0.144133	0.163431	0.204882	0.182525	0.19123	0.139922	0.135847	0.15256	0.14624	0.177082	0.170173	0.187815	0.18111	0.207069	0.226479	0.189159		373	l_dorsal_raphe_nucleus - [g/ml{SUVbw}]	0.600656	0.370211	0.348869	0.335345	0.367584	0.35909	0.369631	0.348105	0.300833	0.349472	0.287161	0.26714	0.263973	0.196643	0.211763	0.202815	0.182464	0.201349	0.192558
			443	l_dorsal_septal_nucleus - [g/ml{SUVbw}]	0.296088	0.0557785	0.198336	0.129951	0.132245	0.168896	0.170759	0.190414	0.133552	0.152794	0.100932	0.0906888	0.101911	0.116187	0.090614	0.103307	0.0749918	0.0931598	0.0903188	0.0960092	0.0905809	0.103867	0.0828303		427	l_dorsal_septal_nucleus - [g/ml{SUVbw}]	0.404197	0.387029	0.390565	0.260511	0.430299	0.332733	0.327874	0.320195	0.270777	0.277019	0.237772	0.241593	0.243972	0.226366	0.205242	0.148403	0.149117	0.147821	0.161474
			55	l_dorsal_spinocerebellar_tract_of_the_medulla - [g/ml{SUVbw}]	0.319291	0.226496	0.427907	0.263921	0.4006	0.254053	0.230931	0.153549	0.13062	0.206721	0.195033	0.187517	0.149755	0.137361	0.156714	0.168282	0.202795	0.191277	0.204519	0.220504	0.241196	0.240876	0.250515		53	l_dorsal_spinocerebellar_tract_of_the_medulla - [g/ml{SUVbw}]	0.598515	1.06278	1.19807	1.28883	1.22172	1.24044	1.17644	1.04995	1.10858	0.999797	1.03174	0.991045	0.85773	0.796656	0.683069	0.609421	0.579151	0.588928	0.612217
			487	l_dorsal_tegmental_nucleus - [g/ml{SUVbw}]	0.197236	0.255312	0.229941	0.155149	0.239709	0.149822	0.187272	0.214522	0.227058	0.165209	0.12064	0.13045	0.120996	0.12052	0.107266	0.102023	0.098395	0.100039	0.102688	0.0891529	0.108616	0.11412	0.0940137		469	l_dorsal_tegmental_nucleus - [g/ml{SUVbw}]	0.618783	0.36877	0.360898	0.392768	0.413477	0.405409	0.405512	0.372509	0.362186	0.370909	0.307266	0.321338	0.275917	0.218925	0.245179	0.237478	0.210416	0.243516	0.219156
			497	l_dorsal_terminal_nucleus_of_the_accessory_optic_tract - [g/ml{SUVbw}]	0.369162	0.144706	0.11652	0.289559	0.319271	0.132289	0.172845	0.194324	0.20416	0.136529	0.173886	0.119866	0.0827425	0.18502	0.108499	0.120811	0.0947953	0.121527	0.122063	0.114075	0.0984459	0.103945	0.113186		479	l_dorsal_terminal_nucleus_of_the_accessory_optic_tract - [g/ml{SUVbw}]	0.668793	0.554241	0.318564	0.358624	0.324417	0.402555	0.327138	0.334607	0.304468	0.282844	0.230627	0.225754	0.250105	0.20457	0.192666	0.18163	0.137274	0.158963	0.163957
			543	l_endopiriform_nucleus - [g/ml{SUVbw}]	0.368781	0.308453	0.269592	0.262737	0.250039	0.25203	0.239094	0.257795	0.338559	0.219037	0.218955	0.189585	0.191533	0.190369	0.157882	0.170862	0.162348	0.17422	0.161544	0.15408	0.201389	0.158115	0.207127		527	l_endopiriform_nucleus - [g/ml{SUVbw}]	0.860301	0.503844	0.580965	0.558048	0.7182	0.59649	0.51708	0.526401	0.455796	0.430671	0.549838	0.371866	0.393282	0.371328	0.374923	0.344909	0.382901	0.35778	0.359588
			255	l_entorhinal_area - [g/ml{SUVbw}]	0.502265	0.431906	0.447942	0.305999	0.323419	0.326357	0.352388	0.285281	0.246267	0.190042	0.271966	0.22582	0.221384	0.239085	0.226408	0.198513	0.196851	0.227024	0.248576	0.252514	0.272365	0.265235	0.245161		245	l_entorhinal_area - [g/ml{SUVbw}]	0.493798	0.725303	0.768289	0.853474	0.862492	0.832786	0.773346	0.750667	0.748471	0.726958	0.72122	0.658384	0.608505	0.605336	0.548323	0.52019	0.509247	0.529901	0.524077
			237	l_external_capsule - [g/ml{SUVbw}]	0.356531	0.362929	0.234945	0.251403	0.269232	0.217312	0.225968	0.179278	0.194324	0.160622	0.192128	0.157954	0.20335	0.152957	0.131341	0.140935	0.149982	0.147109	0.161851	0.157446	0.181354	0.163285	0.194932		231	l_external_capsule - [g/ml{SUVbw}]	0.704007	0.503807	0.507012	0.468062	0.476655	0.421391	0.382911	0.400949	0.376961	0.360257	0.373968	0.318438	0.32779	0.284563	0.258093	0.254757	0.266645	0.278201	0.287309
			141	l_external_medullary_lamina - [g/ml{SUVbw}]	0.157307	0.108492	0.160493	0.344659	0.112211	0.161031	0.23858	0.161573	0.124411	0.131649	0.126002	0.088769	0.104145	0.115065	0.0930753	0.0996775	0.0979068	0.11784	0.104441	0.106498	0.101581	0.101705	0.109563		137	l_external_medullary_lamina - [g/ml{SUVbw}]	0.445752	0.256277	0.222891	0.32024	0.296545	0.300878	0.230131	0.238137	0.239594	0.218609	0.185459	0.185712	0.185862	0.16225	0.146277	0.13077	0.11352	0.13099	0.134263
			239	l_extreme_capsule - [g/ml{SUVbw}]	0.423526	0.389315	0.293006	0.301492	0.310804	0.229465	0.250693	0.195023	0.194388	0.173606	0.202025	0.165309	0.196836	0.165871	0.148516	0.147137	0.174265	0.16618	0.187234	0.182146	0.209137	0.196828	0.221342		233	l_extreme_capsule - [g/ml{SUVbw}]	0.678684	0.435391	0.468012	0.46325	0.396802	0.382909	0.36609	0.386965	0.381131	0.347697	0.348787	0.312588	0.316429	0.275899	0.255828	0.245579	0.270489	0.27048	0.287475
			129	l_facial_nucleus - [g/ml{SUVbw}]	0.173118	0.13539	0.304198	0.23395	0.205733	0.234248	0.256787	0.221765	0.302509	0.19884	0.184457	0.193328	0.157595	0.130621	0.130605	0.134004	0.112772	0.148582	0.178049	0.159097	0.169644	0.18555	0.183056		125	l_facial_nucleus - [g/ml{SUVbw}]	0.901293	1.14281	1.00788	0.819211	1.03582	0.998925	0.969993	0.886312	0.938396	0.744212	0.697715	0.769911	0.684331	0.607749	0.552983	0.569993	0.513068	0.588507	0.564084
			219	l_fasciculus_retroflexus_of_the_interbrain - [g/ml{SUVbw}]	0.235692	0.136962	0.169495	0.459559	0.236909	0.261144	0.150229	0.126216	0.317272	0.060123	0.191405	0.14994	0.110718	0.131231	0.11419	0.126206	0.135041	0.11438	0.150841	0.129401	0.129789	0.103215	0.130546		209	l_fasciculus_retroflexus_of_the_interbrain - [g/ml{SUVbw}]	0.392273	0.242381	0.26594	0.321353	0.335537	0.273943	0.260296	0.258586	0.195395	0.215563	0.191177	0.167653	0.149046	0.148451	0.14751	0.125618	0.105353	0.118673	0.114727
			245	l_fasciculus_retroflexus_of_the_midbrain - [g/ml{SUVbw}]	0.259669	0.18293	0.276982	0.18903	0.182664	0.190005	0.16023	0.160922	0.104051	0.134575	0.111066	0.140595	0.0923593	0.11511	0.125975	0.114338	0.115102	0.103379	0.120271	0.0894256	0.117697	0.118336	0.127131		239	l_fasciculus_retroflexus_of_the_midbrain - [g/ml{SUVbw}]	1.44847	0.6357	0.828353	0.7825	0.859423	0.644102	0.622385	0.673325	0.602708	0.534595	0.557986	0.580861	0.541596	0.503788	0.441976	0.380322	0.387714	0.41655	0.41885
			103	l_fasciolar_gyrus - [g/ml{SUVbw}]	0.165747	0.152726	0.377098	0.231991	0.163479	0.178179	0.253949	0.161069	0.122052	0.134751	0.129095	0.0907077	0.115801	0.134878	0.0943698	0.130809	0.103778	0.122431	0.12673	0.14053	0.11983	0.107622	0.122217		101	l_fasciolar_gyrus - [g/ml{SUVbw}]	0.42502	0.320268	0.233792	0.416706	0.323164	0.299506	0.246793	0.244998	0.235359	0.208696	0.224319	0.189533	0.197911	0.196657	0.157321	0.147851	0.13385	0.141218	0.153205
			251	l_field_H2 - [g/ml{SUVbw}]	0.279076	0.170542	0.26548	0.189918	0.348217	0.199472	0.180098	0.132025	0.134367	0.130689	0.138089	0.10908	0.0981118	0.141421	0.135474	0.140718	0.100124	0.111037	0.140301	0.0995616	0.0950556	0.109701	0.133329		241	l_field_H2 - [g/ml{SUVbw}]	1.22222	0.492013	0.590956	0.525678	0.462508	0.499469	0.438448	0.377673	0.420344	0.355386	0.389871	0.403828	0.330075	0.295	0.285202	0.254504	0.23815	0.257954	0.255903
			145	l_fimbria - [g/ml{SUVbw}]	0.172243	0.140132	0.185112	0.328063	0.155854	0.167116	0.207033	0.174548	0.145651	0.154905	0.126136	0.100341	0.12959	0.11736	0.0963587	0.109416	0.108412	0.124789	0.113331	0.116748	0.112596	0.114439	0.128057		141	l_fimbria - [g/ml{SUVbw}]	0.376202	0.262695	0.240434	0.315849	0.303788	0.290503	0.246425	0.232154	0.244133	0.217181	0.2064	0.207785	0.186734	0.176781	0.148634	0.134453	0.132097	0.136247	0.146031
			369	l_flocculus - [g/ml{SUVbw}]	0.362722	0.343181	0.398758	0.353367	0.230743	0.229574	0.233807	0.265684	0.256286	0.189855	0.178128	0.199128	0.183188	0.137869	0.160073	0.165728	0.150712	0.168489	0.163117	0.158199	0.172242	0.172415	0.174183		359	l_flocculus - [g/ml{SUVbw}]	0.806087	0.673127	0.476122	0.447793	0.532244	0.521739	0.485178	0.475975	0.461428	0.425989	0.444807	0.429001	0.433533	0.403144	0.394779	0.417024	0.426284	0.502466	0.56916
			349	l_folium - [g/ml{SUVbw}]	0.486945	0.424639	0.32877	0.478346	0.42012	0.354423	0.352567	0.367593	0.380967	0.274149	0.332281	0.258663	0.287566	0.268635	0.203176	0.238575	0.251825	0.209391	0.218939	0.230446	0.257761	0.259103	0.254499		339	l_folium - [g/ml{SUVbw}]	0.746612	0.486633	0.398904	0.349916	0.457051	0.375299	0.445609	0.49365	0.380843	0.309624	0.320677	0.294827	0.264697	0.276448	0.238543	0.22274	0.205502	0.199005	0.207758
			381	l_fourth_ventricle - [g/ml{SUVbw}]	0.1812	0.283364	0.214621	0.1953	0.264263	0.215172	0.199876	0.202252	0.113206	0.205238	0.175675	0.160921	0.118102	0.132494	0.127105	0.111487	0.119301	0.0992422	0.100025	0.117635	0.14435	0.117565	0.1156		371	l_fourth_ventricle - [g/ml{SUVbw}]	0.701994	0.455106	0.593931	0.629888	0.471763	0.549591	0.494013	0.483218	0.532119	0.418114	0.383617	0.393996	0.36636	0.366379	0.315327	0.310086	0.291507	0.302204	0.286604
			299	l_frontal_horn_of_the_lateral_ventricle - [g/ml{SUVbw}]	0.204093	0.108942	0.232498	0.140655	0.137165	0.176363	0.149846	0.201814	0.147611	0.146768	0.117659	0.105163	0.102823	0.120757	0.0907988	0.109241	0.0926935	0.09477	0.101123	0.106806	0.101035	0.119655	0.090666		293	l_frontal_horn_of_the_lateral_ventricle - [g/ml{SUVbw}]	0.40895	0.372057	0.362201	0.287697	0.379141	0.324472	0.320068	0.312396	0.265034	0.277216	0.228307	0.240369	0.237671	0.21104	0.194763	0.156243	0.158516	0.153357	0.173252
			287	l_frontal_white_matter - [g/ml{SUVbw}]	0.242844	0.262854	0.218404	0.204586	0.215121	0.221489	0.197415	0.215213	0.184338	0.188145	0.180738	0.180265	0.173766	0.17722	0.182758	0.191303	0.208597	0.223913	0.246177	0.240861	0.273514	0.267683	0.272396		281	l_frontal_white_matter - [g/ml{SUVbw}]	0.404231	0.383922	0.360406	0.333119	0.333257	0.306357	0.312553	0.305993	0.294435	0.285092	0.274766	0.260941	0.246921	0.234488	0.216602	0.209099	0.21312	0.214457	0.230985
		Frontal Cortex	321	l_fronto-orbital_gyrus_macaque - [g/ml{SUVbw}]	0.301653	0.284463	0.341576	0.218294	0.274403	0.253204	0.197067	0.206516	0.223357	0.2188	0.212298	0.192736	0.170785	0.205268	0.194893	0.194924	0.235758	0.240653	0.261818	0.279832	0.27521	0.300477	0.31154		311	l_fronto-orbital_gyrus_macaque - [g/ml{SUVbw}]	0.408532	0.33283	0.370238	0.366125	0.343842	0.317	0.338026	0.321051	0.356796	0.325355	0.305785	0.294214	0.27658	0.259751	0.261862	0.246377	0.277124	0.273829	0.296666
			15	l_fusiform_gyrus (1) - [g/ml{SUVbw}]	0.272708	0.213972	0.299052	0.219394	0.229057	0.216063	0.181849	0.19144	0.177656	0.142368	0.172884	0.140679	0.129125	0.13811	0.122278	0.128555	0.131781	0.132775	0.137867	0.138508	0.141404	0.137694	0.145609		15	l_fusiform_gyrus (1) - [g/ml{SUVbw}]	0.494181	0.331364	0.364989	0.359913	0.348906	0.352525	0.328961	0.313064	0.301455	0.280691	0.27263	0.257288	0.238441	0.227851	0.206864	0.195893	0.195904	0.206742	0.220822
			1189	l_fusiform_gyrus (2) - [g/ml{SUVbw}]	0.272708	0.213972	0.299052	0.219394	0.229057	0.216063	0.181849	0.19144	0.177656	0.142368	0.172884	0.140679	0.129125	0.13811	0.122278	0.128555	0.131781	0.132775	0.137867	0.138508	0.141404	0.137694	0.145609		1147	l_fusiform_gyrus (2) - [g/ml{SUVbw}]	0.494181	0.331364	0.364989	0.359913	0.348906	0.352525	0.328961	0.313064	0.301455	0.280691	0.27263	0.257288	0.238441	0.227851	0.206864	0.195893	0.195904	0.206742	0.220822
			331	l_genu_of_the_corpus_callosum - [g/ml{SUVbw}]	0.147224	0.204249	0.212359	0.128548	0.167376	0.195191	0.0976119	0.189639	0.122652	0.131564	0.100491	0.184043	0.103809	0.124827	0.119623	0.13314	0.142614	0.108056	0.131186	0.146935	0.139654	0.162909	0.156156		1167	l_fusiform_gyrus_wm (1) - [g/ml{SUVbw}]	0.512539	0.30775	0.358455	0.360757	0.330749	0.346665	0.326357	0.29912	0.287521	0.274379	0.265722	0.247778	0.23065	0.224823	0.195705	0.182857	0.183204	0.194727	0.206814
			461	l_gigantocellular_nucleus - [g/ml{SUVbw}]	0.229242	0.153076	0.420167	0.283122	0.301576	0.143861	0.185524	0.1751	0.218749	0.226093	0.178778	0.184836	0.173995	0.166237	0.154102	0.133027	0.184019	0.176763	0.196135	0.182179	0.197244	0.236446	0.176152		321	l_genu_of_the_corpus_callosum - [g/ml{SUVbw}]	0.437941	0.280712	0.274741	0.375795	0.337836	0.296751	0.277385	0.258842	0.260571	0.255303	0.20172	0.209768	0.229021	0.159443	0.161891	0.147461	0.148503	0.130817	0.178549
			43	l_gracile_fasciculus_of_the_medulla - [g/ml{SUVbw}]	0.433282	0.242913	0.407479	0.377533	0.327056	0.241087	0.240229	0.234656	0.186345	0.173151	0.202633	0.184277	0.200884	0.171549	0.178996	0.177993	0.196998	0.204523	0.214712	0.199693	0.239959	0.224017	0.245924		445	l_gigantocellular_nucleus - [g/ml{SUVbw}]	0.476088	0.476933	0.64445	0.660838	0.774247	0.739469	0.717309	0.688516	0.61084	0.652788	0.631862	0.523026	0.500835	0.494125	0.458297	0.413053	0.426283	0.447506	0.450105
			355	l_gracile_lobule - [g/ml{SUVbw}]	0.279794	0.360278	0.306625	0.265465	0.228967	0.32672	0.219486	0.159639	0.165996	0.184632	0.164301	0.114307	0.153445	0.17927	0.116545	0.120221	0.148253	0.0997247	0.123561	0.110832	0.108416	0.127	0.136869		43	l_gracile_fasciculus_of_the_medulla - [g/ml{SUVbw}]	0.518855	0.772042	0.97517	0.909855	0.929369	0.900641	0.92477	0.794531	0.832508	0.817755	0.779967	0.69599	0.686473	0.632601	0.576387	0.508336	0.523936	0.526354	0.592796
			25	l_gracile_nucleus_of_the_medulla - [g/ml{SUVbw}]	0.294544	0.165359	0.346634	0.316568	0.177919	0.189294	0.167944	0.15467	0.140009	0.140909	0.102368	0.134893	0.126549	0.121107	0.116506	0.118854	0.116872	0.114783	0.117674	0.120594	0.146302	0.124665	0.153845		1195	l_gracile_fasciculus_of_the_medulla_wm - [g/ml{SUVbw}]	0.475344	0.682341	0.911508	0.862418	0.915463	0.862963	0.898165	0.766976	0.777111	0.777326	0.743822	0.66193	0.654818	0.62524	0.561655	0.487339	0.519727	0.524521	0.586733
			513	l_granular_layer_of_the_dentate_gyrus - [g/ml{SUVbw}]	0.314877	0.241839	0.244811	0.316243	0.253943	0.190418	0.225767	0.199937	0.184304	0.186457	0.166105	0.147706	0.143572	0.129058	0.14646	0.137213	0.134925	0.144983	0.140195	0.160162	0.143431	0.160926	0.153345		345	l_gracile_lobule - [g/ml{SUVbw}]	0.736938	0.782948	0.751253	0.709685	0.680143	0.780014	0.710662	0.692913	0.60955	0.580384	0.617968	0.546544	0.522148	0.478589	0.445358	0.427109	0.449295	0.414428	0.423797
			211	l_habenular_commissure - [g/ml{SUVbw}]	0.453029	0.239717	0.263715	0.36139	0.27778	0.414565	0.282258	0.192807	0.435111	0.109932	0.238616	0.225135	0.140057	0.143856	0.138669	0.131082	0.166168	0.130083	0.205599	0.139	0.159458	0.136636	0.145383		25	l_gracile_nucleus_of_the_medulla - [g/ml{SUVbw}]	0.588987	0.863843	0.929805	0.865485	0.950475	0.905385	0.854379	0.790394	0.829312	0.732627	0.780272	0.661699	0.669753	0.601399	0.546788	0.492679	0.48772	0.483082	0.550575
			531	l_hilus_of_the_dentate_gyrus - [g/ml{SUVbw}]	0.356454	0.289269	0.218708	0.355491	0.2774	0.210707	0.235832	0.198583	0.213627	0.205745	0.175409	0.171493	0.158838	0.1281	0.155598	0.138376	0.143584	0.148645	0.148815	0.161914	0.147031	0.176798	0.158235		1177	l_gracile_nucleus_of_the_medulla_wm - [g/ml{SUVbw}]	0.574864	0.835335	0.914226	0.848552	0.960291	0.891982	0.856635	0.781169	0.821367	0.728355	0.772267	0.655753	0.664222	0.601434	0.54704	0.488439	0.486931	0.485372	0.554706
			537	l_hippocampal-amygdaloid_transition_area - [g/ml{SUVbw}]	0.392855	0.391807	0.403393	0.379489	0.325311	0.293834	0.201164	0.173807	0.2022	0.188096	0.173527	0.186143	0.144821	0.115834	0.168964	0.152714	0.144592	0.126812	0.153317	0.126148	0.121547	0.146947	0.136439		497	l_granular_layer_of_the_dentate_gyrus - [g/ml{SUVbw}]	0.337455	0.337322	0.318031	0.363587	0.348915	0.334637	0.318614	0.284517	0.3112	0.267027	0.275532	0.268086	0.241773	0.235621	0.20572	0.195845	0.192661	0.194804	0.211557
			57	l_hypoglossal_nucleus - [g/ml{SUVbw}]	0.285372	0.180257	0.43475	0.331519	0.234773	0.184107	0.180807	0.193859	0.143884	0.191392	0.121382	0.143287	0.13163	0.122594	0.126962	0.137515	0.139451	0.126477	0.137269	0.134445	0.163562	0.152741	0.163116		201	l_habenular_commissure - [g/ml{SUVbw}]	0.383087	0.242914	0.261865	0.289594	0.333768	0.274677	0.301929	0.27027	0.185379	0.209102	0.194742	0.160763	0.142879	0.150719	0.14606	0.122353	0.101337	0.114939	0.11235
		Hypothalamus	561	l_hypothalamus - [g/ml{SUVbw}]	0.310805	0.285469	0.317027	0.249307	0.440199	0.26419	0.210041	0.206633	0.234008	0.180691	0.217209	0.131373	0.14235	0.174354	0.156122	0.174701	0.1415	0.143908	0.171897	0.159419	0.165092	0.181179	0.174019		541	l_hypothalamus - [g/ml{SUVbw}]	1.22752	0.847028	0.800464	0.658975	0.869521	0.728914	0.670204	0.60369	0.62562	0.608083	0.575359	0.607904	0.536073	0.474038	0.446779	0.409285	0.397563	0.424242	0.441164
			53	l_inferior_cerebellar_peduncle - [g/ml{SUVbw}]	0.315932	0.243078	0.309874	0.211838	0.334257	0.284893	0.177322	0.162457	0.186558	0.162738	0.196958	0.176339	0.155642	0.115431	0.144733	0.122348	0.129535	0.126654	0.175759	0.154118	0.154274	0.142717	0.163616		521	l_hippocampal-amygdaloid_transition_area - [g/ml{SUVbw}]	0.781576	0.436923	0.511852	0.564089	0.326255	0.440899	0.411389	0.396959	0.40642	0.371149	0.352862	0.389395	0.337446	0.342581	0.287247	0.243286	0.258546	0.261158	0.271051
			377	l_inferior_colliculus_-_not_otherwise_specified - [g/ml{SUVbw}]	0.37781	0.524492	0.464627	0.234021	0.402189	0.368683	0.252425	0.227901	0.29272	0.29126	0.200039	0.203465	0.195376	0.177455	0.158247	0.171835	0.15968	0.152828	0.179079	0.12762	0.148034	0.140574	0.148877		55	l_hypoglossal_nucleus - [g/ml{SUVbw}]	0.518232	0.664131	0.759692	0.741973	0.93961	0.832538	0.821701	0.733228	0.75103	0.687115	0.696692	0.610728	0.566427	0.579441	0.541729	0.437061	0.461564	0.468133	0.503407
		Frontal Cortex	319	l_inferior_frontal_gyrus - [g/ml{SUVbw}]	0.150458	0.19658	0.163673	0.216315	0.188815	0.179188	0.213289	0.206645	0.151363	0.166743	0.160056	0.165893	0.15968	0.168771	0.180353	0.201526	0.194668	0.238915	0.254613	0.251619	0.273943	0.273007	0.266306		309	l_inferior_frontal_gyrus - [g/ml{SUVbw}]	0.341914	0.34703	0.31922	0.304684	0.329712	0.286558	0.279906	0.282483	0.28137	0.281856	0.272572	0.2564	0.253507	0.232809	0.236759	0.221148	0.236219	0.240982	0.256949
			11	l_inferior_occipital_gyrus (1) - [g/ml{SUVbw}]	0.311473	0.268215	0.252061	0.233588	0.178922	0.195135	0.197253	0.165087	0.164467	0.146106	0.170861	0.150748	0.127497	0.123176	0.125011	0.118319	0.130078	0.131495	0.129996	0.143915	0.142899	0.133912	0.144539		51	l_inferior_cerebellar_peduncle - [g/ml{SUVbw}]	1.70001	1.72037	1.33226	1.2333	1.35659	1.32638	1.18448	1.28865	1.23897	0.975242	1.02399	0.995642	0.894034	0.798172	0.732341	0.705342	0.587484	0.630581	0.60219
			1185	l_inferior_occipital_gyrus (2) - [g/ml{SUVbw}]	0.311473	0.268215	0.252061	0.233588	0.178922	0.195135	0.197253	0.165087	0.164467	0.146106	0.170861	0.150748	0.127497	0.123176	0.125011	0.118319	0.130078	0.131495	0.129996	0.143915	0.142899	0.133912	0.144539		367	l_inferior_colliculus_-_not_otherwise_specified - [g/ml{SUVbw}]	0.608687	0.41326	0.397836	0.416126	0.34199	0.337014	0.338781	0.404412	0.314467	0.349024	0.283809	0.271843	0.227391	0.202301	0.189374	0.190979	0.150676	0.161178	0.155431
			85	l_inferior_olivary_complex_-_not_otherwise_specified - [g/ml{SUVbw}]	0.220804	0.190821	0.4272	0.301227	0.295009	0.190433	0.212398	0.195685	0.260225	0.238197	0.198931	0.181237	0.185761	0.168136	0.161644	0.143092	0.193591	0.195161	0.206371	0.195201	0.200576	0.24411	0.18853	112	515	l_hilus_of_the_dentate_gyrus - [g/ml{SUVbw}]	0.336738	0.366761	0.384334	0.401146	0.375394	0.350037	0.36689	0.323411	0.348655	0.308784	0.2976	0.311631	0.270143	0.263259	0.235502	0.217341	0.217878	0.222739	0.238603
			155	l_inferior_pulvinar_nucleus - [g/ml{SUVbw}]	0.220106	0.160247	0.114383	0.296483	0.212778	0.140487	0.193904	0.191993	0.130937	0.136589	0.155495	0.0936956	0.083963	0.112165	0.109957	0.111473	0.102551	0.11746	0.11562	0.121109	0.101984	0.0966718	0.108367		11	l_inferior_occipital_gyrus (1) - [g/ml{SUVbw}]	0.566341	0.342874	0.3822	0.366983	0.367273	0.346616	0.346495	0.320363	0.312022	0.321983	0.295564	0.26178	0.264177	0.246921	0.230777	0.215342	0.218112	0.221234	0.239193
			359	l_inferior_semilunar_lobule - [g/ml{SUVbw}]	0.324639	0.48518	0.338702	0.27495	0.424201	0.295229	0.269438	0.204523	0.245402	0.276852	0.204408	0.169681	0.177623	0.254613	0.164978	0.162135	0.170973	0.158987	0.170378	0.157874	0.174105	0.19464	0.170041		1143	l_inferior_occipital_gyrus (2) - [g/ml{SUVbw}]	0.566341	0.342874	0.3822	0.366983	0.367273	0.346616	0.346495	0.320363	0.312022	0.321983	0.295564	0.26178	0.264177	0.246921	0.230777	0.215342	0.218112	0.221234	0.239193
			65	l_inferior_temporal_gyrus - [g/ml{SUVbw}]	0.300083	0.250943	0.234655	0.250383	0.236111	0.236049	0.211164	0.193219	0.159633	0.187446	0.177748	0.15145	0.141794	0.139553	0.15878	0.154471	0.173744	0.190321	0.199804	0.217993	0.22284	0.232157	0.250782		1163	l_inferior_occipital_gyrus_wm (1) - [g/ml{SUVbw}]	0.766634	0.463911	0.522992	0.464977	0.49568	0.459785	0.450568	0.418056	0.385967	0.395715	0.375176	0.327764	0.329026	0.310143	0.271416	0.245044	0.238145	0.243808	0.269281
			291	l_inferior_thalamic_peduncle - [g/ml{SUVbw}]	0.156547	0.173432	0.235933	0.166125	0.386587	0.212474	0.178469	0.131315	0.162136	0.135799	0.116366	0.0882111	0.0871332	0.146003	0.117908	0.133811	0.0884622	0.0978147	0.115229	0.112281	0.0940288	0.104792	0.138287		83	l_inferior_olivary_complex_-_not_otherwise_specified - [g/ml{SUVbw}]	0.661888	0.802005	0.910177	0.732246	0.786162	0.856336	0.845512	0.742044	0.727031	0.635257	0.64823	0.664292	0.546136	0.533121	0.485088	0.474045	0.458358	0.503925	0.489924
			73	l_inferior_vestibular_nucleus - [g/ml{SUVbw}]	0.185624	0.209482	0.198719	0.167366	0.328939	0.266541	0.161909	0.142633	0.100766	0.191714	0.185545	0.166176	0.133528	0.125169	0.130173	0.105861	0.109711	0.101426	0.119073	0.125361	0.149926	0.115595	0.130435		151	l_inferior_pulvinar_nucleus - [g/ml{SUVbw}]	0.441565	0.427737	0.229768	0.305667	0.272125	0.37191	0.267559	0.259552	0.263978	0.250268	0.234113	0.219996	0.21964	0.191967	0.160017	0.145875	0.134788	0.131194	0.156399
			549	l_inner_portion_of_the_medial_globus_pallidus - [g/ml{SUVbw}]	0.270119	0.496619	0.432038	0.215205	0.321247	0.276231	0.150566	0.172676	0.189995	0.189814	0.174736	0.103123	0.118946	0.135279	0.162408	0.16061	0.114106	0.118601	0.131242	0.150784	0.144325	0.141388	0.135561		443	l_inferior_salivatory_nucleus - [g/ml{SUVbw}]	1.06541	1.07907	1.13573	1.10106	0.988795	0.964722	0.994802	0.981747	1.00985	0.762284	0.720726	0.790752	0.706737	0.732192	0.598777	0.598628	0.552314	0.562148	0.539206
			243	l_insula - [g/ml{SUVbw}]	0.362124	0.287193	0.302894	0.328441	0.258662	0.281328	0.224082	0.194343	0.180322	0.186833	0.196472	0.145674	0.138181	0.133406	0.139164	0.135664	0.155046	0.147301	0.139787	0.152194	0.148532	0.14225	0.171397		349	l_inferior_semilunar_lobule - [g/ml{SUVbw}]	0.685761	0.454678	0.610809	0.485389	0.516258	0.46157	0.480948	0.470446	0.465559	0.452211	0.454801	0.392965	0.3972	0.376827	0.327154	0.318486	0.329713	0.320648	0.350885
			459	l_intermediate_reticular_nucleus - [g/ml{SUVbw}]	0.3123	0.162043	0.413429	0.261158	0.328233	0.175962	0.181355	0.157312	0.177351	0.210157	0.178464	0.185984	0.151199	0.151352	0.152016	0.142151	0.178269	0.171006	0.189286	0.184809	0.209311	0.226851	0.19172		65	l_inferior_temporal_gyrus - [g/ml{SUVbw}]	0.344787	0.368479	0.343587	0.345974	0.352762	0.341322	0.32639	0.315885	0.323364	0.311666	0.294651	0.278664	0.278784	0.266776	0.246374	0.243969	0.253616	0.263628	0.273916
			49	l_internal_arcuate_fibers - [g/ml{SUVbw}]	0.54154	0.318469	0.608202	0.450035	0.423114	0.287538	0.308076	0.284258	0.188166	0.245662	0.204705	0.230753	0.227106	0.195371	0.192966	0.208853	0.235187	0.216648	0.247132	0.22738	0.247128	0.249846	0.263206		285	l_inferior_thalamic_peduncle - [g/ml{SUVbw}]	0.956209	0.424002	0.493016	0.363881	0.422883	0.411112	0.394254	0.310862	0.341329	0.30069	0.321643	0.314735	0.278667	0.224726	0.225685	0.200655	0.191273	0.20003	0.213453
			159	l_internal_capsule - [g/ml{SUVbw}]	0.170452	0.176211	0.155617	0.160405	0.184899	0.139805	0.151506	0.168511	0.125647	0.143031	0.11222	0.109721	0.109065	0.105586	0.102671	0.0915031	0.0934297	0.103628	0.0960051	0.0995782	0.0984428	0.10222	0.0985775		71	l_inferior_vestibular_nucleus - [g/ml{SUVbw}]	1.23075	1.01654	1.03105	1.13388	0.93405	0.969045	0.894258	0.956642	0.988976	0.733634	0.699822	0.749492	0.679412	0.676299	0.563775	0.561561	0.515365	0.524038	0.49995
			107	l_internal_genu_of_the_facial_nerve - [g/ml{SUVbw}]	0.156838	0.23631	0.1849	0.102754	0.173044	0.14024	0.176986	0.253932	0.184175	0.180411	0.131173	0.126027	0.0816904	0.144105	0.0993953	0.102887	0.0982356	0.0944816	0.0897307	0.102818	0.109382	0.111988	0.0925418		237	l_insula - [g/ml{SUVbw}]	0.600964	0.370718	0.366276	0.432204	0.358432	0.333687	0.307667	0.31075	0.317712	0.306522	0.267235	0.263326	0.269036	0.226448	0.207837	0.198108	0.212835	0.197613	0.197335
			221	l_internal_medullary_lamina - [g/ml{SUVbw}]	0.153026	0.164405	0.118821	0.154078	0.123141	0.117774	0.107437	0.102789	0.113304	0.117163	0.0783941	0.0953432	0.0946122	0.093674	0.0841133	0.0836449	0.0962208	0.0800742	0.0987149	0.102005	0.0955078	0.0921198	0.0991383		441	l_intermediate_reticular_nucleus - [g/ml{SUVbw}]	0.834869	1.21213	1.22685	1.09869	1.14421	1.16304	1.16459	0.996867	1.08677	0.920344	0.857593	0.903571	0.767512	0.779831	0.638773	0.587319	0.574691	0.595968	0.587735
			197	l_interpeduncular_nucleus - [g/ml{SUVbw}]	0.277851	0.406206	0.364041	0.255253	0.263189	0.208224	0.212141	0.237237	0.159166	0.161261	0.129484	0.174134	0.143767	0.159538	0.136954	0.128833	0.138659	0.132062	0.164384	0.134985	0.166967	0.154589	0.170406		49	l_internal_arcuate_fibers - [g/ml{SUVbw}]	0.361397	0.577752	0.727561	0.755951	0.839821	0.858136	0.811466	0.725168	0.675899	0.694622	0.683357	0.615137	0.553462	0.583711	0.544155	0.425325	0.475139	0.486935	0.523849
			59	l_interpolar_part_of_the_spinal_trigeminal_nucleus - [g/ml{SUVbw}]	0.390283	0.197115	0.326097	0.199068	0.363357	0.200663	0.173309	0.137524	0.168371	0.190504	0.194922	0.183075	0.141417	0.125189	0.152514	0.143588	0.169132	0.161597	0.187155	0.173735	0.200152	0.209605	0.185845		1201	l_internal_arcuate_fibers_wm - [g/ml{SUVbw}]	0.543796	0.951102	0.97952	0.992886	1.05946	1.0038	0.941698	0.894178	0.914594	0.793402	0.838717	0.777285	0.729038	0.681261	0.611716	0.529144	0.53014	0.528455	0.595071
			477	l_interposed_nucleus_of_the_medulla - [g/ml{SUVbw}]	0.120751	0.197551	0.155242	0.165587	0.222771	0.153058	0.155814	0.183505	0.078392	0.220928	0.15645	0.140994	0.105947	0.123016	0.117635	0.103087	0.109118	0.0946839	0.0887318	0.110812	0.153102	0.111091	0.109874		155	l_internal_capsule - [g/ml{SUVbw}]	0.335782	0.241781	0.249612	0.255154	0.244255	0.254455	0.219886	0.237163	0.19547	0.180465	0.193879	0.172567	0.171458	0.148094	0.139636	0.134581	0.118642	0.119472	0.121192
			289	l_interventricular_foramen - [g/ml{SUVbw}]	0.241344	0.0578546	0.220656	0.161572	0.215503	0.197835	0.277086	0.181211	0.184149	0.160451	0.0978141	0.0936961	0.093557	0.156095	0.10627	0.102003	0.0707411	0.0871867	0.0912032	0.102822	0.0890708	0.102631	0.112354		105	l_internal_genu_of_the_facial_nerve - [g/ml{SUVbw}]	0.608697	0.354897	0.43701	0.517506	0.494599	0.477238	0.469772	0.407598	0.469492	0.380463	0.335803	0.373989	0.313828	0.277601	0.278524	0.294146	0.246901	0.293739	0.251224
			115	l_isthmus_of_the_cingulate_gyrus - [g/ml{SUVbw}]	0.276818	0.403609	0.196058	0.263992	0.174467	0.260979	0.189775	0.202573	0.166094	0.179462	0.158009	0.136444	0.13678	0.160849	0.106265	0.124322	0.131588	0.142889	0.138684	0.121205	0.143518	0.139541	0.181538		213	l_internal_medullary_lamina - [g/ml{SUVbw}]	0.432729	0.192153	0.279201	0.287729	0.261951	0.241534	0.226091	0.259097	0.226865	0.212524	0.191745	0.186024	0.167905	0.136779	0.158196	0.124237	0.121045	0.110162	0.11924
			281	l_lateral_amygdalar_nucleus - [g/ml{SUVbw}]	0.251178	0.215512	0.177063	0.185383	0.195277	0.265097	0.27358	0.227883	0.20812	0.205159	0.197235	0.181087	0.151499	0.141512	0.137339	0.124788	0.125965	0.135007	0.135405	0.146674	0.147752	0.136994	0.155874		189	l_interpeduncular_nucleus - [g/ml{SUVbw}]	1.38792	0.986598	1.12806	1.01096	1.09807	0.835099	0.889723	0.869174	0.815001	0.792827	0.756485	0.775163	0.729508	0.647472	0.582686	0.488648	0.520208	0.543573	0.546959
			455	l_lateral_aperture_of_the_fourth_ventricle - [g/ml{SUVbw}]	0.329195	0.247559	0.369979	0.284064	0.303956	0.273425	0.192697	0.193608	0.231806	0.147022	0.177072	0.191898	0.16115	0.107293	0.144671	0.124838	0.127216	0.127282	0.174058	0.160427	0.134729	0.131525	0.157616		57	l_interpolar_part_of_the_spinal_trigeminal_nucleus - [g/ml{SUVbw}]	0.950314	1.62024	1.49066	1.36533	1.39677	1.44161	1.41607	1.235	1.34348	1.11324	1.09797	1.12191	0.947912	0.919251	0.751951	0.683453	0.63686	0.668384	0.661247
			31	l_lateral_corticospinal_tract_of_the_medulla - [g/ml{SUVbw}]	0.479728	0.334351	0.551445	0.435007	0.414579	0.297425	0.309956	0.237715	0.180349	0.220178	0.214791	0.224988	0.221442	0.191034	0.203969	0.203018	0.241767	0.229819	0.250375	0.23834	0.276335	0.270182	0.287071		459	l_interposed_nucleus_of_the_medulla - [g/ml{SUVbw}]	0.750213	0.530685	0.758168	0.744319	0.627138	0.643294	0.610068	0.588377	0.69055	0.4888	0.447446	0.485445	0.46449	0.461254	0.389991	0.389352	0.360997	0.375739	0.35357
			223	l_lateral_dorsal_nucleus - [g/ml{SUVbw}]	0.15788	0.149926	0.10115	0.334964	0.105481	0.102772	0.109322	0.0825476	0.105231	0.0768771	0.0943656	0.101614	0.0841889	0.0767001	0.0910457	0.0981283	0.107741	0.0778247	0.105751	0.111418	0.0985339	0.0961563	0.102008		283	l_interventricular_foramen - [g/ml{SUVbw}]	0.560421	0.299627	0.346072	0.266042	0.341537	0.312656	0.333874	0.270751	0.266874	0.251131	0.229732	0.219468	0.222134	0.185734	0.182624	0.140484	0.138187	0.128221	0.152829
			217	l_lateral_geniculate_nucleus - [g/ml{SUVbw}]	0.236011	0.143865	0.0892746	0.263157	0.265142	0.204353	0.186787	0.196121	0.188734	0.1294	0.147613	0.125345	0.116813	0.094125	0.118964	0.106472	0.114136	0.117576	0.114723	0.122385	0.0983458	0.103934	0.116452		111	l_isthmus_of_the_cingulate_gyrus - [g/ml{SUVbw}]	0.538903	0.354537	0.373061	0.456714	0.353464	0.330992	0.316951	0.338044	0.285467	0.288768	0.250678	0.259904	0.255375	0.211934	0.180308	0.162372	0.156056	0.160401	0.171577
		Striatum	249	l_lateral_globus_pallidus - [g/ml{SUVbw}]	0.134919	0.13366	0.222876	0.203791	0.112438	0.198343	0.170366	0.182566	0.145573	0.152463	0.142214	0.133292	0.112483	0.0824355	0.108705	0.120061	0.0954392	0.0851211	0.0887457	0.121555	0.119891	0.0908449	0.0835529
			201	l_lateral_habenular_nucleus - [g/ml{SUVbw}]	0.235615	0.286216	0.187444	0.447404	0.27039	0.334956	0.217694	0.140059	0.338816	0.0955199	0.205591	0.170981	0.105511	0.13994	0.130108	0.153126	0.151947	0.127889	0.179966	0.160946	0.155452	0.14821	0.160351		435	l_lateral_aperture_of_the_fourth_ventricle - [g/ml{SUVbw}]	1.17458	0.992981	0.776574	0.823058	0.919005	0.898178	0.708111	0.791233	0.829935	0.606751	0.698578	0.645939	0.620686	0.532032	0.494987	0.493496	0.445837	0.491066	0.467955
			393	l_lateral_hypothalamic_area_-_not_otherwise_specified - [g/ml{SUVbw}]	0.317293	0.226217	0.33922	0.28368	0.334232	0.246029	0.215827	0.145745	0.194933	0.140164	0.18322	0.117591	0.138596	0.163632	0.155312	0.164656	0.133495	0.127532	0.163194	0.124235	0.123708	0.144241	0.154808		31	l_lateral_corticospinal_tract_of_the_medulla - [g/ml{SUVbw}]	0.397882	0.66006	1.01475	0.912199	0.956565	0.962649	0.92418	0.810707	0.778795	0.84951	0.759117	0.793037	0.697887	0.67825	0.593265	0.522043	0.548335	0.552247	0.599983
			125	l_lateral_lemniscus - [g/ml{SUVbw}]	0.424435	0.278432	0.377371	0.434437	0.362047	0.287283	0.343769	0.234665	0.299513	0.276637	0.228157	0.288652	0.211093	0.189351	0.179425	0.198319	0.160599	0.209068	0.243778	0.187891	0.214283	0.240549	0.252815		1183	l_lateral_corticospinal_tract_of_the_medulla_wm - [g/ml{SUVbw}]	0.35796	0.615065	0.92144	0.850037	0.858845	0.924182	0.875934	0.77749	0.719572	0.792451	0.722229	0.718597	0.642009	0.647309	0.575612	0.488006	0.528557	0.539831	0.580501
			263	l_lateral_mammillary_nucleus - [g/ml{SUVbw}]	0.41276	0.289344	0.356892	0.338896	0.3511	0.29213	0.292463	0.186818	0.282111	0.168472	0.218531	0.146159	0.186468	0.209539	0.178765	0.187876	0.165213	0.151822	0.199148	0.168968	0.163776	0.193164	0.184758		215	l_lateral_dorsal_nucleus - [g/ml{SUVbw}]	0.433658	0.169271	0.240777	0.325379	0.281206	0.224999	0.213854	0.255494	0.237546	0.222951	0.189991	0.176101	0.152436	0.139186	0.154027	0.126841	0.121325	0.120238	0.115016
			247	l_lateral_medullary_lamina - [g/ml{SUVbw}]	0.127362	0.119619	0.195429	0.20453	0.124276	0.193751	0.177808	0.182045	0.143039	0.144445	0.140543	0.142896	0.117188	0.082684	0.104602	0.12002	0.0965275	0.0839627	0.0885344	0.122867	0.118308	0.0888116	0.0850261		207	l_lateral_geniculate_nucleus - [g/ml{SUVbw}]	0.377709	0.281593	0.253303	0.306945	0.275896	0.285387	0.238252	0.222831	0.276683	0.243826	0.203744	0.239564	0.176119	0.171862	0.145189	0.130077	0.13207	0.133718	0.139859
		Frontal Cortex	323	l_lateral_orbital_gyrus - [g/ml{SUVbw}]	0.242152	0.292848	0.206178	0.172666	0.201158	0.249732	0.236639	0.193449	0.167402	0.193746	0.188869	0.160355	0.214229	0.180171	0.231826	0.214952	0.242949	0.250911	0.283296	0.317122	0.310012	0.335148	0.35294		313	l_lateral_orbital_gyrus - [g/ml{SUVbw}]	0.43522	0.535211	0.430582	0.399991	0.50628	0.368324	0.375947	0.403451	0.371289	0.392544	0.352672	0.335459	0.338124	0.312593	0.289153	0.275901	0.293165	0.285065	0.313425
			389	l_lateral_parabrachial_nucleus - [g/ml{SUVbw}]	0.401771	0.312759	0.268915	0.194485	0.262267	0.255059	0.214574	0.297143	0.248734	0.18641	0.187858	0.166779	0.176218	0.159714	0.117467	0.129972	0.123721	0.113165	0.121019	0.109655	0.120218	0.117165	0.122325		121	l_lateral_lemniscus - [g/ml{SUVbw}]	1.0274	0.750391	0.608466	0.601432	0.554714	0.649383	0.576139	0.531757	0.517054	0.472386	0.44374	0.471864	0.425666	0.406466	0.366992	0.34263	0.327221	0.383971	0.386029
			465	l_lateral_paragigantocellular_nucleus - [g/ml{SUVbw}]	0.133166	0.143778	0.362278	0.255994	0.263733	0.162948	0.187349	0.1599	0.284008	0.223124	0.190025	0.163858	0.180856	0.16991	0.147564	0.118944	0.166939	0.172076	0.184681	0.171187	0.180523	0.220799	0.168823		257	l_lateral_mammillary_nucleus - [g/ml{SUVbw}]	1.5552	0.975479	0.82042	0.992422	0.864913	0.906738	0.8407	0.754469	0.761619	0.658713	0.67119	0.732621	0.646411	0.581156	0.54366	0.488287	0.482371	0.503599	0.483769
			157	l_lateral_pulvinar_nucleus - [g/ml{SUVbw}]	0.137569	0.10486	0.158711	0.359382	0.110453	0.117352	0.248447	0.136728	0.110882	0.135609	0.119918	0.0857354	0.104166	0.116988	0.0892539	0.103108	0.0977815	0.121121	0.100473	0.103129	0.0983825	0.0900701	0.0910173	141	275	l_lateral_amygdalar_nucleus - [g/ml{SUVbw}]	0.528587	0.392058	0.450716	0.454502	0.587968	0.517959	0.437739	0.413121	0.453471	0.417226	0.4531	0.373258	0.353514	0.337346	0.312386	0.309198	0.33081	0.300615	0.322169
			67	l_lateral_reticular_nucleus - [g/ml{SUVbw}]	0.240173	0.150953	0.361564	0.263395	0.297059	0.185585	0.195433	0.156134	0.270189	0.198687	0.191275	0.192358	0.173656	0.15815	0.156855	0.134707	0.170335	0.179479	0.205875	0.18898	0.219788	0.221398	0.200126		379	l_lateral_parabrachial_nucleus - [g/ml{SUVbw}]	0.703603	0.393529	0.423922	0.487598	0.414817	0.381037	0.384943	0.420354	0.356276	0.346595	0.301874	0.376556	0.252814	0.240378	0.240957	0.246489	0.195865	0.215184	0.212894
			301	l_lateral_septal_nucleus - [g/ml{SUVbw}]	0.182975	0.0661946	0.206354	0.0982749	0.206266	0.204654	0.144376	0.219438	0.141183	0.158506	0.135863	0.0871956	0.0805431	0.112981	0.0902195	0.127126	0.0867551	0.107801	0.104884	0.10852	0.105262	0.123362	0.0967612		451	l_lateral_paragigantocellular_nucleus - [g/ml{SUVbw}]	0.958384	1.24076	1.31717	0.976272	1.07946	1.15931	1.14937	0.988007	1.04454	0.803378	0.82261	0.884448	0.726164	0.710262	0.607143	0.579608	0.552165	0.598504	0.574602
			401	l_lateral_vestibular_nucleus - [g/ml{SUVbw}]	0.189776	0.201386	0.187802	0.173714	0.327887	0.263787	0.186112	0.174946	0.133398	0.237352	0.206923	0.177354	0.128188	0.151636	0.129863	0.111649	0.114219	0.101354	0.110762	0.128081	0.14935	0.108689	0.121573		153	l_lateral_pulvinar_nucleus - [g/ml{SUVbw}]	0.417478	0.237739	0.199423	0.265728	0.278599	0.316281	0.219935	0.226845	0.23767	0.214306	0.169136	0.177584	0.166301	0.151902	0.141808	0.123678	0.106152	0.125533	0.123798
			505	l_lateral_vestibulospinal_tract - [g/ml{SUVbw}]	0.351326	0.172831	0.413214	0.274409	0.331996	0.174591	0.195686	0.161635	0.191271	0.215654	0.186352	0.203968	0.163367	0.161383	0.162301	0.146361	0.188973	0.184043	0.201827	0.189508	0.213778	0.238824	0.196655		67	l_lateral_reticular_nucleus - [g/ml{SUVbw}]	0.907491	1.31621	1.31916	1.04059	1.16619	1.20119	1.20015	1.04797	1.10188	0.928533	0.866212	0.928614	0.787934	0.762247	0.644083	0.601316	0.576264	0.613535	0.599713
			475	l_laterodorsal_tegmental_nucleus - [g/ml{SUVbw}]	0.249095	0.266863	0.250408	0.162115	0.2795	0.178242	0.198991	0.247691	0.236415	0.177478	0.1381	0.145667	0.151846	0.128352	0.111946	0.114777	0.108473	0.103279	0.111994	0.0958395	0.11576	0.116086	0.106572		295	l_lateral_septal_nucleus - [g/ml{SUVbw}]	0.482522	0.498053	0.482455	0.287245	0.56925	0.407911	0.378394	0.367551	0.319762	0.328112	0.301335	0.303285	0.306811	0.267773	0.238847	0.202554	0.208367	0.209752	0.231099
			503	l_limitans_nucleus - [g/ml{SUVbw}]	0.191648	0.223982	0.164295	0.371523	0.301652	0.244118	0.162046	0.15908	0.312161	0.0928792	0.168995	0.13383	0.0875086	0.143829	0.109526	0.152836	0.124984	0.125788	0.14344	0.141171	0.123656	0.133069	0.146617		393	l_lateral_vestibular_nucleus - [g/ml{SUVbw}]	0.804682	0.461045	0.63645	0.762152	0.510745	0.600922	0.534452	0.528679	0.666806	0.443519	0.409431	0.440794	0.367265	0.387995	0.325836	0.35317	0.303977	0.341632	0.292942
			7	l_lingual_gyrus (1) - [g/ml{SUVbw}]	0.265754	0.294814	0.315361	0.270637	0.260949	0.211713	0.204867	0.203408	0.176923	0.139324	0.170901	0.129126	0.128765	0.13159	0.122475	0.100865	0.107875	0.117361	0.124527	0.112388	0.12327	0.126009	0.117109		489	l_lateral_vestibulospinal_tract - [g/ml{SUVbw}]	0.870546	1.17553	1.14254	1.0672	1.10615	1.11729	1.09518	0.986671	1.04549	0.843686	0.826747	0.85755	0.733595	0.749171	0.623009	0.572384	0.566263	0.5761	0.577618
			1181	l_lingual_gyrus (2) - [g/ml{SUVbw}]	0.265754	0.294814	0.315361	0.270637	0.260949	0.211713	0.204867	0.203408	0.176923	0.139324	0.170901	0.129126	0.128765	0.13159	0.122475	0.100865	0.107875	0.117361	0.124527	0.112388	0.12327	0.126009	0.117109		457	l_laterodorsal_tegmental_nucleus - [g/ml{SUVbw}]	0.625525	0.379668	0.353676	0.394815	0.390628	0.373642	0.391161	0.364995	0.343949	0.353991	0.293226	0.315254	0.25906	0.209753	0.238363	0.222577	0.190087	0.212593	0.202271
			1201	l_lingual_gyrus_wm (1) - [g/ml{SUVbw}]	0.324092	0.277956	0.309465	0.256641	0.308017	0.20786	0.226075	0.200065	0.175351	0.141364	0.174464	0.135683	0.126491	0.133948	0.126553	0.107209	0.110209	0.118216	0.130482	0.109841	0.125951	0.121327	0.123565		487	l_limitans_nucleus - [g/ml{SUVbw}]	0.460358	0.361241	0.295598	0.353754	0.335686	0.294533	0.266169	0.278387	0.20909	0.214713	0.197642	0.172892	0.176964	0.157729	0.154147	0.136949	0.108655	0.13212	0.130478
			333	l_lingula - [g/ml{SUVbw}]	0.221561	0.320287	0.312959	0.211564	0.265057	0.229972	0.23794	0.320622	0.243828	0.250719	0.190983	0.175849	0.132288	0.181332	0.128326	0.123944	0.132189	0.112997	0.118925	0.110726	0.124729	0.116112	0.101511		7	l_lingual_gyrus (1) - [g/ml{SUVbw}]	0.514522	0.336226	0.36728	0.347704	0.335741	0.31861	0.309656	0.294813	0.278745	0.247393	0.259239	0.225969	0.20821	0.183987	0.170783	0.152436	0.157485	0.161517	0.157318
			339	l_lobule_II - [g/ml{SUVbw}]	0.347539	0.417855	0.470553	0.287772	0.439184	0.411902	0.305522	0.297738	0.293383	0.309249	0.25202	0.221425	0.179975	0.202251	0.167765	0.160489	0.163828	0.147852	0.16834	0.124778	0.140843	0.129335	0.134184		1139	l_lingual_gyrus (2) - [g/ml{SUVbw}]	0.514522	0.336226	0.36728	0.347704	0.335741	0.31861	0.309656	0.294813	0.278745	0.247393	0.259239	0.225969	0.20821	0.183987	0.170783	0.152436	0.157485	0.161517	0.157318
			341	l_lobule_III - [g/ml{SUVbw}]	0.602037	0.409225	0.49317	0.33782	0.503082	0.458356	0.338532	0.277168	0.233026	0.323561	0.261208	0.250105	0.18815	0.19728	0.183668	0.15971	0.190913	0.17757	0.187494	0.143231	0.140986	0.134949	0.161337		1159	l_lingual_gyrus_wm (1) - [g/ml{SUVbw}]	0.536112	0.350589	0.388935	0.366005	0.368919	0.341468	0.336911	0.31304	0.298713	0.262977	0.276122	0.236168	0.220551	0.196548	0.181956	0.161176	0.167399	0.172421	0.17576
			343	l_lobule_IV - [g/ml{SUVbw}]	0.773813	0.380892	0.373856	0.326265	0.279563	0.280973	0.295481	0.235487	0.261928	0.235632	0.203356	0.238657	0.161884	0.149565	0.18032	0.161015	0.181497	0.159516	0.155738	0.163711	0.132642	0.124768	0.153089		323	l_lingula - [g/ml{SUVbw}]	0.531476	0.304012	0.359028	0.416399	0.320182	0.374186	0.330873	0.319106	0.353853	0.308701	0.238289	0.266057	0.23534	0.22087	0.201208	0.216383	0.175377	0.192415	0.17132
			345	l_lobule_V - [g/ml{SUVbw}]	0.534937	0.555664	0.387985	0.462923	0.315608	0.318289	0.238253	0.2255	0.341299	0.174674	0.261898	0.244846	0.213772	0.143159	0.166479	0.197859	0.199735	0.193064	0.173927	0.174651	0.165054	0.152854	0.179748		329	l_lobule_II - [g/ml{SUVbw}]	0.572877	0.350656	0.372313	0.423858	0.298259	0.355758	0.324448	0.359702	0.324575	0.332326	0.258816	0.261076	0.216939	0.213944	0.185199	0.196225	0.153424	0.163163	0.147863
			567	l_lobule_VIIIA - [g/ml{SUVbw}]	0.599792	0.445623	0.403856	0.366775	0.380243	0.331521	0.311068	0.308603	0.364474	0.325157	0.32972	0.246755	0.250115	0.260092	0.194317	0.202785	0.226666	0.192362	0.201206	0.180599	0.214065	0.204367	0.238335		331	l_lobule_III - [g/ml{SUVbw}]	0.599538	0.398927	0.404668	0.472457	0.310346	0.348927	0.34693	0.409836	0.313662	0.351452	0.275339	0.259801	0.205644	0.223467	0.186079	0.159283	0.148094	0.150314	0.138581
			569	l_lobule_VIIIB - [g/ml{SUVbw}]	0.646382	0.380318	0.450167	0.30114	0.327981	0.304354	0.26967	0.263568	0.261319	0.299503	0.281349	0.217787	0.219803	0.224455	0.174564	0.166038	0.185135	0.15082	0.171061	0.145872	0.167293	0.152153	0.197318		333	l_lobule_IV - [g/ml{SUVbw}]	0.686626	0.353718	0.382982	0.409677	0.418884	0.329887	0.290888	0.33717	0.272812	0.326401	0.236114	0.241668	0.189942	0.202515	0.172925	0.137945	0.140138	0.138416	0.133045
			431	l_locus_ceruleus - [g/ml{SUVbw}]	0.235197	0.250314	0.235211	0.153454	0.25829	0.185363	0.196527	0.265301	0.229621	0.177099	0.145765	0.14533	0.145998	0.132357	0.109256	0.114326	0.108346	0.101283	0.107194	0.0992928	0.11522	0.114269	0.108039		335	l_lobule_V - [g/ml{SUVbw}]	0.64199	0.35763	0.355126	0.322225	0.337435	0.296731	0.253349	0.255993	0.256331	0.241336	0.207251	0.198959	0.169886	0.185117	0.146885	0.137436	0.136646	0.131693	0.138685
			177	l_longitudinal_pontine_fibers - [g/ml{SUVbw}]	1.09279	0.761529	0.657669	0.664021	0.563574	0.569336	0.519683	0.445771	0.489625	0.365423	0.362673	0.404813	0.323424	0.314278	0.326904	0.319594	0.312793	0.352892	0.35069	0.323811	0.338812	0.394745	0.379021		545	l_lobule_VIIIA - [g/ml{SUVbw}]	0.401151	0.34678	0.295072	0.269466	0.318416	0.291357	0.316952	0.310721	0.237384	0.236827	0.234727	0.221546	0.210104	0.209006	0.183392	0.171601	0.182828	0.181564	0.191532
			275	l_mammillary_peduncle - [g/ml{SUVbw}]	0.43286	0.313885	0.396932	0.358917	0.382045	0.308834	0.297883	0.190593	0.298427	0.165659	0.240892	0.143498	0.196752	0.219737	0.187276	0.191626	0.167994	0.158423	0.204334	0.17685	0.17031	0.195241	0.18631		547	l_lobule_VIIIB - [g/ml{SUVbw}]	0.27781	0.463282	0.411209	0.368846	0.389148	0.379534	0.408482	0.349244	0.282048	0.287343	0.295851	0.267641	0.259142	0.258732	0.236303	0.219415	0.243454	0.248235	0.247278
			271	l_mammillary_princeps_fasciculus - [g/ml{SUVbw}]	0.321129	0.217525	0.276793	0.235282	0.290152	0.216848	0.206222	0.162578	0.19939	0.159551	0.16997	0.134028	0.134455	0.159155	0.139222	0.161791	0.131171	0.132091	0.162418	0.118643	0.126584	0.154344	0.160524		419	l_locus_ceruleus - [g/ml{SUVbw}]	0.622282	0.377314	0.365313	0.424751	0.415665	0.390843	0.406156	0.367281	0.368262	0.35384	0.30135	0.330653	0.25255	0.220499	0.242809	0.239611	0.203364	0.233814	0.211467
			265	l_mammillothalamic_tract_of_the_hypothalamus - [g/ml{SUVbw}]	0.323451	0.216238	0.287831	0.241695	0.305306	0.225211	0.207617	0.156268	0.193418	0.14908	0.170431	0.127549	0.131866	0.159601	0.143382	0.161821	0.129927	0.130301	0.161706	0.117583	0.123003	0.148788	0.153891		171	l_longitudinal_pontine_fibers - [g/ml{SUVbw}]	0.843098	0.792105	0.80716	0.896907	0.798083	0.752886	0.79735	0.696015	0.651236	0.626081	0.695849	0.65737	0.60242	0.575045	0.534438	0.478134	0.483037	0.510675	0.550443
			81	l_medial_accessory_nucleus_of_the_inferior_olive - [g/ml{SUVbw}]	0.316855	0.201665	0.539712	0.366692	0.351058	0.158473	0.208236	0.245994	0.18657	0.243487	0.17273	0.19954	0.197014	0.1762	0.163702	0.158203	0.212408	0.193598	0.223293	0.212662	0.213961	0.262922	0.192844		269	l_mammillary_peduncle - [g/ml{SUVbw}]	1.53518	1.03078	0.812941	1.00244	0.859906	0.935075	0.858712	0.748156	0.771724	0.677834	0.680159	0.745452	0.654115	0.586223	0.546196	0.492098	0.487301	0.507854	0.492466
			547	l_medial_amygdalar_nucleus - [g/ml{SUVbw}]	0.320253	0.48652	0.444251	0.246793	0.252461	0.235573	0.178044	0.198616	0.202774	0.223855	0.162884	0.131944	0.130468	0.11253	0.16831	0.144562	0.117641	0.118556	0.123613	0.14066	0.14024	0.14388	0.126084		265	l_mammillary_princeps_fasciculus - [g/ml{SUVbw}]	1.45029	0.806443	0.837361	0.766838	0.818666	0.78797	0.702097	0.718044	0.693404	0.591184	0.58999	0.650337	0.569333	0.50118	0.489352	0.444269	0.426666	0.466816	0.437702
			423	l_medial_dorsal_nucleus - [g/ml{SUVbw}]	0.378714	0.130922	0.179856	0.418607	0.167857	0.207134	0.163858	0.123748	0.252281	0.076197	0.163156	0.166527	0.112331	0.123832	0.112404	0.116176	0.133288	0.107164	0.147958	0.138534	0.130507	0.109344	0.136169		249	l_mammillotegmental_fasciculus - [g/ml{SUVbw}]	1.22886	0.540553	0.639674	0.520827	0.58361	0.564223	0.476859	0.50981	0.507059	0.409992	0.437688	0.459768	0.4014	0.356225	0.346378	0.307787	0.289864	0.310973	0.308045
			203	l_medial_habenular_nucleus - [g/ml{SUVbw}]	0.392203	0.249081	0.237471	0.495206	0.259221	0.352744	0.25537	0.150778	0.412974	0.0978031	0.232627	0.216268	0.126185	0.144093	0.140126	0.137122	0.169472	0.130614	0.206396	0.165908	0.16564	0.143045	0.163619		259	l_mammillothalamic_tract_of_the_hypothalamus - [g/ml{SUVbw}]	1.45114	0.72917	0.737118	0.700153	0.727841	0.721953	0.632942	0.619897	0.613722	0.523812	0.538984	0.589998	0.511719	0.450886	0.440232	0.394941	0.380396	0.409226	0.387167
			385	l_medial_lemniscus_of_the_medulla - [g/ml{SUVbw}]	0.323719	0.247317	0.577962	0.398757	0.373529	0.192528	0.235508	0.281373	0.184198	0.252759	0.18645	0.191711	0.205127	0.172022	0.167833	0.178928	0.213298	0.191584	0.221808	0.210771	0.212656	0.25159	0.201592		79	l_medial_accessory_nucleus_of_the_inferior_olive - [g/ml{SUVbw}]	0.44839	0.518497	0.659021	0.666079	0.75559	0.826518	0.803299	0.6931	0.609114	0.638552	0.618191	0.537975	0.494503	0.505079	0.478811	0.404869	0.449875	0.46315	0.46508
			185	l_medial_lemniscus_of_the_midbrain - [g/ml{SUVbw}]	0.308969	0.450786	0.389615	0.309922	0.266468	0.237239	0.260768	0.240825	0.189736	0.170237	0.147148	0.202772	0.147455	0.173311	0.147778	0.14998	0.152829	0.135972	0.174735	0.141452	0.16862	0.169745	0.187809		531	l_medial_amygdalar_nucleus - [g/ml{SUVbw}]	0.706054	0.482449	0.536131	0.590154	0.514488	0.502972	0.474727	0.507841	0.43472	0.416239	0.389326	0.384426	0.343486	0.370328	0.305732	0.281164	0.279895	0.27307	0.294565
			173	l_medial_lemniscus_of_the_pons - [g/ml{SUVbw}]	0.401555	0.333221	0.433517	0.426654	0.399705	0.302502	0.318676	0.246659	0.332747	0.269353	0.254831	0.259032	0.202044	0.176039	0.193227	0.202231	0.181752	0.223332	0.224436	0.206293	0.235969	0.246655	0.262987		413	l_medial_dorsal_nucleus - [g/ml{SUVbw}]	0.419961	0.232886	0.297502	0.306821	0.337284	0.268857	0.257493	0.256958	0.229948	0.245915	0.208741	0.186432	0.152018	0.153627	0.155601	0.129538	0.119824	0.116859	0.113313
			133	l_medial_longitudinal_fasciculus_of_the_pons - [g/ml{SUVbw}]	0.17101	0.271404	0.196579	0.154759	0.209429	0.129248	0.183026	0.206239	0.182139	0.167492	0.119076	0.122206	0.0981141	0.119062	0.105382	0.0989096	0.0975979	0.0978921	0.09694	0.0925544	0.114271	0.116873	0.0912006		193	l_medial_habenular_nucleus - [g/ml{SUVbw}]	0.393703	0.237389	0.26434	0.302344	0.338837	0.274726	0.278778	0.270382	0.203061	0.225736	0.198581	0.173202	0.148463	0.156798	0.148266	0.125685	0.108076	0.117585	0.112412
			261	l_medial_mammillary_nucleus - [g/ml{SUVbw}]	0.389986	0.320346	0.332906	0.328828	0.36912	0.27611	0.276358	0.211492	0.298018	0.188795	0.22959	0.150596	0.192843	0.212831	0.172826	0.187131	0.165644	0.16248	0.197989	0.17137	0.173673	0.203029	0.192277		375	l_medial_lemniscus_of_the_medulla - [g/ml{SUVbw}]	0.406839	0.485893	0.620599	0.647264	0.752417	0.771972	0.74824	0.667084	0.605679	0.644427	0.620172	0.521704	0.493916	0.504607	0.472781	0.402603	0.441271	0.451084	0.459917
		Frontal Cortex	329	l_medial_orbital_gyrus - [g/ml{SUVbw}]	0.375845	0.404684	0.24487	0.252751	0.286165	0.22712	0.203243	0.254002	0.157721	0.202338	0.207803	0.23374	0.182635	0.214349	0.213714	0.202148	0.235988	0.246405	0.28191	0.256565	0.322943	0.300314	0.349362		319	l_medial_orbital_gyrus - [g/ml{SUVbw}]	0.486439	0.488685	0.426174	0.426636	0.485657	0.403326	0.449148	0.413812	0.371051	0.374447	0.364128	0.349549	0.325951	0.328083	0.287316	0.282352	0.28906	0.293413	0.322281
			391	l_medial_parabrachial_nucleus - [g/ml{SUVbw}]	0.254186	0.266943	0.263566	0.174595	0.262954	0.228326	0.210607	0.301093	0.246131	0.199317	0.174552	0.160493	0.156477	0.155442	0.114525	0.12396	0.123028	0.108618	0.113838	0.108163	0.120751	0.114633	0.1141		167	l_medial_lemniscus_of_the_pons - [g/ml{SUVbw}]	0.717846	0.816348	0.69333	0.727052	0.642225	0.810454	0.713079	0.673099	0.649952	0.570969	0.619638	0.588262	0.546111	0.497244	0.463197	0.463006	0.424148	0.492076	0.504253
			149	l_medial_pulvinar_nucleus - [g/ml{SUVbw}]	0.168217	0.112202	0.131626	0.391676	0.183514	0.161047	0.17581	0.186016	0.172417	0.116479	0.137287	0.1051	0.0901701	0.128596	0.0963381	0.109966	0.102979	0.119106	0.110293	0.114793	0.103102	0.115514	0.119912		85	l_medial_longitudinal_fasciculus_of_the_medulla - [g/ml{SUVbw}]	0.408689	0.527813	0.664102	0.700992	0.854472	0.842401	0.807561	0.709833	0.658888	0.683573	0.665509	0.573796	0.533119	0.551696	0.51527	0.404177	0.465103	0.465598	0.486056
			469	l_medial_reticular_nucleus - [g/ml{SUVbw}]	0.43017	0.218434	0.605295	0.362495	0.38106	0.21239	0.226918	0.234307	0.157587	0.227156	0.176254	0.196149	0.177088	0.169285	0.160019	0.17342	0.207275	0.189386	0.210452	0.209776	0.225248	0.242408	0.223549		129	l_medial_longitudinal_fasciculus_of_the_pons - [g/ml{SUVbw}]	0.654397	0.387618	0.512322	0.500212	0.509937	0.496529	0.474541	0.459101	0.465534	0.405015	0.367392	0.395398	0.356121	0.312479	0.305612	0.296014	0.257921	0.295957	0.273624
			441	l_medial_septal_nucleus - [g/ml{SUVbw}]	0.219825	0.0661822	0.231857	0.0875568	0.224403	0.211104	0.145353	0.242108	0.141223	0.16144	0.133489	0.105034	0.0891792	0.11482	0.0969574	0.139469	0.0982783	0.119866	0.11376	0.109809	0.112042	0.130123	0.098158		255	l_medial_mammillary_nucleus - [g/ml{SUVbw}]	1.53757	1.06333	0.93169	0.986112	0.967108	0.971431	0.903303	0.818363	0.8261	0.726868	0.719932	0.79059	0.695768	0.612671	0.588013	0.538232	0.517803	0.551556	0.52546
			75	l_medial_vestibular_nucleus - [g/ml{SUVbw}]	0.154974	0.198331	0.179011	0.156045	0.260822	0.192095	0.169853	0.189158	0.110145	0.217957	0.177165	0.151414	0.115227	0.137817	0.120866	0.105926	0.111584	0.0967031	0.098416	0.116365	0.14841	0.112297	0.113931		247	l_medial_medullary_lamina - [g/ml{SUVbw}]	0.906029	0.596118	0.62414	0.70166	0.62558	0.561872	0.51306	0.555406	0.527036	0.465263	0.451285	0.423249	0.357179	0.407279	0.328308	0.314832	0.326958	0.318231	0.342806
			563	l_median_aperture_of_the_fourth_ventricle - [g/ml{SUVbw}]	0.302236	0.180637	0.322832	0.308951	0.144788	0.189179	0.16606	0.153731	0.142257	0.127764	0.0912339	0.135377	0.123865	0.120152	0.113019	0.11169	0.109863	0.112247	0.110158	0.115871	0.139501	0.110479	0.152177	181	179	l_medial_lemniscus_of_the_midbrain - [g/ml{SUVbw}]	1.55707	1.13367	1.27807	1.20537	1.30297	0.952027	1.0666	1.04273	0.937025	0.86184	0.875532	0.883988	0.848827	0.773821	0.674154	0.560536	0.597243	0.618212	0.612512
			37	l_medullary_white_matter_-_not_otheriwise_specified - [g/ml{SUVbw}]	0.456967	0.289892	0.592718	0.399053	0.41022	0.282366	0.294717	0.231465	0.160485	0.236205	0.208028	0.237458	0.20859	0.189389	0.191042	0.19762	0.242823	0.236273	0.249135	0.246157	0.267782	0.275987	0.28111		381	l_medial_parabrachial_nucleus - [g/ml{SUVbw}]	0.627223	0.365162	0.378504	0.455504	0.406874	0.378975	0.390135	0.383005	0.368305	0.343494	0.296116	0.333672	0.24176	0.225836	0.229282	0.241887	0.195677	0.217331	0.201605
			479	l_mesencephalic_nucleus_of_the_trigeminal_nerve - [g/ml{SUVbw}]	0.341214	0.309483	0.234638	0.152502	0.297642	0.193176	0.207493	0.257536	0.224288	0.18475	0.151713	0.151743	0.163156	0.1348	0.111915	0.126851	0.112462	0.106161	0.116733	0.104458	0.119549	0.118624	0.117924		145	l_medial_pulvinar_nucleus - [g/ml{SUVbw}]	0.452619	0.264154	0.241898	0.311747	0.302987	0.299645	0.238024	0.258413	0.236434	0.221974	0.180828	0.174987	0.173718	0.1539	0.149058	0.132868	0.11118	0.133629	0.131774
			111	l_mesencephalic_tract_of_the_trigeminal_nerve - [g/ml{SUVbw}]	0.321681	0.297736	0.248718	0.161237	0.29283	0.20385	0.207159	0.265504	0.232914	0.188304	0.157552	0.155192	0.166494	0.138572	0.113404	0.12665	0.116253	0.107642	0.117787	0.105495	0.121167	0.118795	0.117737		455	l_medial_reticular_nucleus - [g/ml{SUVbw}]	0.397847	0.57427	0.717784	0.745055	0.853554	0.866242	0.826545	0.723592	0.675841	0.700579	0.678597	0.614314	0.555645	0.577462	0.534206	0.418799	0.471967	0.481074	0.50933
			417	l_midbrain - [g/ml{SUVbw}]	0.224792	0.351238	0.33001	0.228863	0.210469	0.181595	0.193019	0.217192	0.129808	0.142981	0.116229	0.169197	0.122181	0.143103	0.118476	0.118429	0.128244	0.108536	0.141703	0.112556	0.145603	0.133629	0.148273		425	l_medial_septal_nucleus - [g/ml{SUVbw}]	0.498187	0.557989	0.509096	0.323856	0.623185	0.447027	0.412567	0.404083	0.357234	0.365691	0.332903	0.346968	0.330097	0.294425	0.270132	0.242147	0.240392	0.240458	0.26546
			175	l_middle_cerebellar_peduncle - [g/ml{SUVbw}]	0.738468	0.651948	0.484443	0.509934	0.452387	0.450738	0.387444	0.331382	0.392012	0.29766	0.278513	0.313226	0.277977	0.226497	0.238656	0.22833	0.233798	0.283082	0.284747	0.243305	0.237455	0.277804	0.284262		73	l_medial_vestibular_nucleus - [g/ml{SUVbw}]	0.871149	0.676231	0.807986	0.871368	0.689907	0.725396	0.69098	0.686148	0.776682	0.558885	0.5168	0.556102	0.507201	0.518524	0.430147	0.43728	0.404267	0.414709	0.389381
		Frontal Cortex	317	l_middle_frontal_gyrus - [g/ml{SUVbw}]	0.198672	0.177707	0.172777	0.186441	0.162919	0.164273	0.244599	0.189575	0.189109	0.171987	0.164449	0.145494	0.167726	0.146499	0.170972	0.195187	0.205029	0.234915	0.234026	0.258934	0.291934	0.276132	0.268942		307	l_middle_frontal_gyrus - [g/ml{SUVbw}]	0.310788	0.375373	0.326041	0.309105	0.297276	0.265714	0.277963	0.276668	0.263756	0.268188	0.266285	0.225814	0.217296	0.208059	0.209181	0.20014	0.194363	0.194922	0.208827
			95	l_middle_temporal_gyrus - [g/ml{SUVbw}]	0.246046	0.249778	0.231576	0.242917	0.227242	0.248261	0.222776	0.225632	0.195967	0.194347	0.176854	0.174955	0.145949	0.146499	0.150808	0.163558	0.169978	0.189059	0.200985	0.210326	0.212727	0.218139	0.231214		1189	l_medullary_white_matter_-_not_otheriwise_specified_wm - [g/ml{SUVbw}]	0.348883	0.617598	0.90091	0.844356	0.865353	0.901724	0.865038	0.747791	0.718845	0.775438	0.716066	0.72018	0.623569	0.624182	0.56323	0.474153	0.50533	0.520351	0.557322
			517	l_molecular_layer_of_the_dentate_gyrus - [g/ml{SUVbw}]	0.319084	0.221948	0.203075	0.337299	0.268342	0.186418	0.201705	0.207502	0.198077	0.182166	0.16655	0.14875	0.146732	0.124697	0.142698	0.135927	0.139213	0.146723	0.135266	0.160582	0.139784	0.156564	0.152759		461	l_mesencephalic_nucleus_of_the_trigeminal_nerve - [g/ml{SUVbw}]	0.649661	0.429466	0.392691	0.413637	0.388946	0.350548	0.37481	0.367513	0.30572	0.343632	0.293973	0.298238	0.254669	0.208004	0.229142	0.210893	0.175195	0.193898	0.194988
		Hippocampus	515	l_molecular_layer_of_the_hippocampus - [g/ml{SUVbw}]	0.350601	0.276203	0.257915	0.317031	0.270721	0.203377	0.223222	0.219955	0.192951	0.197742	0.180194	0.158184	0.156414	0.13254	0.160444	0.145306	0.146949	0.155621	0.154321	0.172129	0.165294	0.18238	0.169829		499	l_molecular_layer_of_the_hippocampus - [g/ml{SUVbw}]	0.348274	0.34966	0.370532	0.397152	0.364408	0.367034	0.361928	0.319465	0.347753	0.312726	0.310254	0.30473	0.268834	0.269391	0.239558	0.22581	0.224396	0.230564	0.247621
			435	l_motor_nucleus_of_the_trigeminal_nerve - [g/ml{SUVbw}]	0.518849	0.318124	0.267836	0.208979	0.238318	0.24177	0.238451	0.381077	0.226293	0.141148	0.219495	0.16651	0.184423	0.145893	0.116294	0.122516	0.0999538	0.110077	0.124206	0.110768	0.109565	0.117917	0.129311		407	l_midbrain - [g/ml{SUVbw}]	1.40796	0.774689	0.978204	0.903777	0.969728	0.726411	0.747568	0.762915	0.700171	0.665183	0.652025	0.673678	0.637462	0.562209	0.509922	0.428542	0.456783	0.47666	0.487721
			109	l_motor_root_of_the_trigeminal_nerve - [g/ml{SUVbw}]	0.228916	0.214627	0.2093	0.159934	0.210106	0.226267	0.202185	0.299305	0.211007	0.198081	0.175222	0.153283	0.132151	0.143055	0.106226	0.115211	0.112087	0.100118	0.106148	0.112447	0.116396	0.112005	0.114992		169	l_middle_cerebellar_peduncle - [g/ml{SUVbw}]	0.888655	0.692418	0.664934	0.70877	0.658192	0.600831	0.656608	0.618376	0.552622	0.522566	0.545289	0.54378	0.477145	0.493651	0.437147	0.402458	0.406911	0.453226	0.467357
			335	l_nodulus - [g/ml{SUVbw}]	0.157132	0.305906	0.188225	0.172292	0.241856	0.210038	0.186324	0.181903	0.0805908	0.17053	0.162604	0.145444	0.123236	0.113919	0.128402	0.104265	0.113695	0.0901763	0.0906123	0.114054	0.142441	0.111235	0.115881	193	37	l_medullary_white_matter_-_not_otheriwise_specified - [g/ml{SUVbw}]	0.321302	0.518375	0.732458	0.719192	0.743927	0.827852	0.800154	0.683472	0.630361	0.682129	0.654853	0.605396	0.543363	0.56314	0.515449	0.423234	0.476169	0.478348	0.505954
		Nucleus Accumbens	311	l_nucleus_accumbens - [g/ml{SUVbw}]	0.246449	0.169412	0.235954	0.171423	0.269036	0.258201	0.136253	0.351588	0.18309	0.212484	0.230807	0.160969	0.175889	0.14984	0.133964	0.172215	0.181545	0.178185	0.211776	0.200255	0.251166	0.241816	0.197156		303	l_nucleus_accumbens - [g/ml{SUVbw}]	0.506756	0.76497	0.44123	0.535779	0.536365	0.537348	0.441222	0.456401	0.446374	0.449127	0.394933	0.362427	0.371456	0.335687	0.318617	0.322309	0.333193	0.341498	0.374406
			279	l_nucleus_of_stria_terminalis - [g/ml{SUVbw}]	0.15999	0.151175	0.198519	0.159946	0.286392	0.224954	0.18483	0.156493	0.170585	0.1377	0.133185	0.076832	0.0826621	0.119576	0.0984801	0.116404	0.0799921	0.09397	0.0985655	0.117134	0.100226	0.114458	0.111223		501	l_molecular_layer_of_the_dentate_gyrus - [g/ml{SUVbw}]	0.332378	0.318254	0.316166	0.351444	0.341225	0.327738	0.319501	0.280197	0.312153	0.270433	0.270728	0.27141	0.234343	0.229832	0.203093	0.192463	0.19358	0.196765	0.210995
			541	l_nucleus_of_the_diagonal_band - [g/ml{SUVbw}]	0.25816	0.147816	0.28738	0.119673	0.414029	0.277205	0.142429	0.335359	0.182591	0.229128	0.237374	0.156167	0.125908	0.116766	0.134326	0.186164	0.152852	0.163331	0.186009	0.187329	0.226321	0.227583	0.172176	196	107	l_mesencephalic_tract_of_the_trigeminal_nerve - [g/ml{SUVbw}]	0.643941	0.401271	0.376341	0.420284	0.39881	0.364427	0.379426	0.376032	0.335952	0.344411	0.295202	0.315936	0.246487	0.213481	0.231225	0.224043	0.180684	0.201758	0.199393
			395	l_nucleus_of_the_posterior_commissure - [g/ml{SUVbw}]	0.395847	0.281085	0.241453	0.341859	0.289739	0.418525	0.296882	0.185981	0.397327	0.117499	0.227094	0.217314	0.137415	0.1447	0.138205	0.136101	0.164205	0.124831	0.207246	0.143588	0.159485	0.145557	0.145743		325	l_nodulus - [g/ml{SUVbw}]	0.749356	0.563065	0.707094	0.677277	0.487575	0.614304	0.568607	0.547376	0.573037	0.45519	0.444524	0.433509	0.440045	0.430031	0.353604	0.350771	0.348282	0.335978	0.329747
			413	l_nucleus_prepositus - [g/ml{SUVbw}]	0.124075	0.199462	0.176308	0.18437	0.197292	0.132724	0.165927	0.199609	0.0876197	0.217413	0.143084	0.13513	0.0961191	0.116908	0.115616	0.103705	0.11009	0.0982265	0.0921067	0.108647	0.148499	0.120651	0.108471	200	95	l_middle_temporal_gyrus - [g/ml{SUVbw}]	0.416097	0.429778	0.406822	0.370397	0.391351	0.386972	0.383137	0.3427	0.351093	0.346489	0.321946	0.311751	0.312446	0.292029	0.26972	0.270357	0.270523	0.277598	0.282667
			3	l_occipital_gyrus_macaque (1) - [g/ml{SUVbw}]	0.366554	0.334934	0.308989	0.269596	0.268374	0.252578	0.220579	0.210687	0.206103	0.181755	0.187869	0.186385	0.163907	0.163118	0.15677	0.169562	0.17601	0.171264	0.176941	0.186565	0.192578	0.197611	0.200122		59	l_nucleus_ambiguus - [g/ml{SUVbw}]	0.777274	1.25819	1.24492	1.06386	1.18141	1.21946	1.20329	0.98405	1.12233	0.947201	0.883434	0.924021	0.768803	0.779553	0.637931	0.576474	0.574208	0.601981	0.594107
			1177	l_occipital_gyrus_macaque (2) - [g/ml{SUVbw}]	0.366554	0.334934	0.308989	0.269596	0.268374	0.252578	0.220579	0.210687	0.206103	0.181755	0.187869	0.186385	0.163907	0.163118	0.15677	0.169562	0.17601	0.171264	0.176941	0.186565	0.192578	0.197611	0.200122		557	l_nucleus_intercalatus - [g/ml{SUVbw}]	0.669819	0.722797	0.833285	0.755058	0.90369	0.824996	0.820307	0.721487	0.782924	0.670569	0.67656	0.623492	0.576143	0.581099	0.523387	0.453077	0.451309	0.46183	0.47369
			1197	l_occipital_gyrus_macaque_wm (1) - [g/ml{SUVbw}]	0.425847	0.458452	0.387892	0.353011	0.360229	0.333911	0.297281	0.265898	0.273978	0.249635	0.257711	0.24394	0.200887	0.22746	0.195456	0.228864	0.225336	0.227392	0.221208	0.237946	0.24881	0.249855	0.250073		273	l_nucleus_of_stria_terminalis - [g/ml{SUVbw}]	0.643713	0.40702	0.432462	0.305188	0.446557	0.359202	0.361351	0.313236	0.305757	0.294889	0.269547	0.284878	0.267546	0.236104	0.205195	0.174872	0.183294	0.181537	0.200775
			87	l_occipital_horn_of_the_lateral_ventricle - [g/ml{SUVbw}]	0.157803	0.114112	0.255996	0.236228	0.186069	0.203941	0.20794	0.164042	0.106058	0.178394	0.10701	0.095024	0.139985	0.119042	0.0906681	0.11285	0.113579	0.101883	0.131605	0.112017	0.118791	0.113025	0.11612		525	l_nucleus_of_the_diagonal_band - [g/ml{SUVbw}]	0.659018	0.736309	0.63485	0.498501	0.790074	0.620703	0.519979	0.519167	0.521622	0.54822	0.480709	0.496795	0.453606	0.424736	0.376704	0.374199	0.374251	0.373454	0.419344
			5	l_occipital_white_matter (1) - [g/ml{SUVbw}]	0.261229	0.2747	0.276347	0.236391	0.20073	0.216093	0.203589	0.188283	0.172304	0.157143	0.160434	0.157569	0.147328	0.138416	0.135168	0.13017	0.134741	0.131278	0.13073	0.141052	0.141858	0.147366	0.15651		481	l_nucleus_of_the_optic_tract - [g/ml{SUVbw}]	0.467695	0.393435	0.309491	0.365723	0.344356	0.294017	0.270485	0.280165	0.211393	0.21815	0.205347	0.174811	0.184044	0.160226	0.156345	0.140327	0.110989	0.134571	0.134052
			1179	l_occipital_white_matter (2) - [g/ml{SUVbw}]	0.261229	0.2747	0.276347	0.236391	0.20073	0.216093	0.203589	0.188283	0.172304	0.157143	0.160434	0.157569	0.147328	0.138416	0.135168	0.13017	0.134741	0.131278	0.13073	0.141052	0.141858	0.147366	0.15651		385	l_nucleus_of_the_posterior_commissure - [g/ml{SUVbw}]	0.400837	0.257641	0.274116	0.303437	0.343521	0.277648	0.298264	0.277773	0.188226	0.212039	0.19944	0.164491	0.15287	0.152188	0.148583	0.127161	0.104053	0.118807	0.119386
			1199	l_occipital_white_matter_wm (1) - [g/ml{SUVbw}]	0.28532	0.284716	0.275268	0.240287	0.207918	0.214553	0.213038	0.186595	0.173424	0.16111	0.16242	0.166092	0.142266	0.145885	0.128892	0.127318	0.131234	0.130756	0.127926	0.137359	0.140877	0.142687	0.143747		403	l_nucleus_prepositus - [g/ml{SUVbw}]	0.784189	0.670113	0.874309	0.805341	0.749963	0.74004	0.73858	0.70133	0.747495	0.571865	0.557637	0.57992	0.534541	0.546616	0.463887	0.448211	0.421166	0.434085	0.416537
			229	l_oculomotor_nerve_fibers - [g/ml{SUVbw}]	0.26576	0.279397	0.303345	0.243358	0.209114	0.200403	0.202368	0.191042	0.140353	0.148939	0.127136	0.161308	0.116229	0.138154	0.132097	0.128317	0.130541	0.110187	0.141743	0.110273	0.136693	0.138912	0.149057		3	l_occipital_gyrus_macaque (1) - [g/ml{SUVbw}]	0.493825	0.37666	0.344737	0.350293	0.315894	0.31496	0.305758	0.302017	0.287226	0.252061	0.269495	0.233557	0.230919	0.217315	0.202214	0.194101	0.190694	0.197812	0.201444
			327	l_olfactory_tubercle - [g/ml{SUVbw}]	0.629527	0.306894	0.370363	0.316287	0.382472	0.327973	0.268007	0.421477	0.27413	0.280416	0.260632	0.199443	0.258983	0.209188	0.180845	0.214332	0.239639	0.216691	0.275438	0.25543	0.340519	0.28191	0.273337		1135	l_occipital_gyrus_macaque (2) - [g/ml{SUVbw}]	0.493825	0.37666	0.344737	0.350293	0.315894	0.31496	0.305758	0.302017	0.287226	0.252061	0.269495	0.233557	0.230919	0.217315	0.202214	0.194101	0.190694	0.197812	0.201444
			467	l_olivocerebellar_tract - [g/ml{SUVbw}]	0.225033	0.210296	0.372938	0.293083	0.244086	0.206933	0.218956	0.215623	0.288693	0.16239	0.189129	0.195977	0.176583	0.123636	0.150033	0.137244	0.1329	0.148237	0.210029	0.177346	0.181235	0.17928	0.193473		1155	l_occipital_gyrus_macaque_wm (1) - [g/ml{SUVbw}]	0.508317	0.3767	0.354729	0.344474	0.312592	0.305546	0.295688	0.302588	0.288932	0.243325	0.255839	0.224426	0.223013	0.202252	0.188918	0.180317	0.173267	0.183949	0.181403
			213	l_optic_tract - [g/ml{SUVbw}]	0.376464	0.569343	0.429416	0.287044	0.360104	0.290997	0.188716	0.18957	0.22953	0.213062	0.187303	0.139562	0.139719	0.128608	0.168671	0.160672	0.130002	0.134599	0.150009	0.167502	0.16375	0.16189	0.146013		87	l_occipital_horn_of_the_lateral_ventricle - [g/ml{SUVbw}]	0.357873	0.309542	0.250797	0.33035	0.299974	0.296417	0.208351	0.229004	0.213716	0.228694	0.217275	0.170989	0.159322	0.182685	0.154485	0.141448	0.129942	0.133755	0.137169
			225	l_oral_pontine_reticular_nucleus - [g/ml{SUVbw}]	0.284182	0.25026	0.234633	0.174214	0.248968	0.192365	0.220292	0.252635	0.227685	0.16688	0.159412	0.151214	0.153412	0.128361	0.114092	0.115515	0.104577	0.115381	0.121403	0.108908	0.125421	0.131238	0.126534		5	l_occipital_white_matter (1) - [g/ml{SUVbw}]	0.489713	0.327173	0.325944	0.322474	0.301512	0.287508	0.294046	0.27948	0.270899	0.235338	0.240486	0.212483	0.21156	0.193768	0.172674	0.164308	0.159887	0.16479	0.16785
		Striatum	551	l_outer_portion_of_the_medial_globus_pallidus - [g/ml{SUVbw}]	0.166763	0.280661	0.345973	0.212498	0.114594	0.201006	0.138481	0.184123	0.160873	0.190909	0.148917	0.114317	0.103494	0.088233	0.134142	0.128328	0.0970398	0.0988328	0.0942805	0.123641	0.129211	0.107348	0.0861356
			419	l_parafascicular_nucleus - [g/ml{SUVbw}]	0.497378	0.0878248	0.263903	0.278358	0.227672	0.280173	0.187302	0.185781	0.211141	0.0845151	0.188829	0.193164	0.110054	0.123614	0.1237	0.111178	0.114841	0.12516	0.142034	0.107806	0.122615	0.103762	0.132751		1157	l_occipital_white_matter_wm (1) - [g/ml{SUVbw}]	0.495922	0.301292	0.323943	0.314607	0.293713	0.286755	0.285098	0.274736	0.261261	0.235319	0.23377	0.20791	0.201204	0.186496	0.168193	0.156238	0.154221	0.157279	0.159221
			511	l_paralaminar_nucleus_of_the_amygdala - [g/ml{SUVbw}]	0.460578	0.317426	0.363315	0.301919	0.321672	0.274212	0.305065	0.27381	0.301248	0.17366	0.254982	0.208586	0.19979	0.247133	0.192973	0.1847	0.171555	0.20233	0.206306	0.201015	0.227012	0.20632	0.218532		223	l_oculomotor_nerve_fibers - [g/ml{SUVbw}]	1.53826	0.751487	0.89121	0.90112	0.960749	0.729396	0.72777	0.754262	0.678894	0.599122	0.632846	0.654617	0.612932	0.566234	0.498754	0.428415	0.44227	0.469829	0.466792
			507	l_paranigral_nucleus - [g/ml{SUVbw}]	0.21269	0.438058	0.379358	0.257569	0.253599	0.193452	0.225339	0.235554	0.146597	0.152295	0.127648	0.18645	0.135024	0.160129	0.12843	0.129299	0.139235	0.121971	0.155201	0.124639	0.15674	0.14409	0.164481		317	l_olfactory_tubercle - [g/ml{SUVbw}]	0.805011	0.766169	0.524464	0.633239	0.578621	0.634989	0.528526	0.566445	0.495757	0.482961	0.499026	0.398582	0.417126	0.384204	0.388644	0.368863	0.384105	0.395444	0.405014
			519	l_parasubicular_area - [g/ml{SUVbw}]	0.486537	0.538148	0.234955	0.489934	0.317581	0.293599	0.261296	0.221192	0.26682	0.241309	0.2187	0.220925	0.174684	0.152647	0.172858	0.154453	0.170821	0.197535	0.205089	0.180885	0.156812	0.187766	0.193633		453	l_olivocerebellar_tract - [g/ml{SUVbw}]	0.677118	0.303354	0.456961	0.514356	0.369125	0.402157	0.378633	0.387264	0.394504	0.332183	0.29214	0.359872	0.227389	0.241866	0.208377	0.244309	0.194598	0.226008	0.19092
			259	l_pars_compacta - [g/ml{SUVbw}]	0.316961	0.212179	0.358588	0.318637	0.323711	0.258123	0.231366	0.144544	0.189337	0.142153	0.180095	0.119382	0.140033	0.16295	0.159773	0.163668	0.138911	0.121687	0.164203	0.125828	0.121615	0.141854	0.154701		203	l_optic_tract - [g/ml{SUVbw}]	1.01436	0.704768	0.569492	0.713587	0.566788	0.642909	0.551497	0.533302	0.529884	0.48085	0.468929	0.491166	0.400873	0.418867	0.351972	0.324476	0.32877	0.332473	0.35664
			209	l_pars_reticulata - [g/ml{SUVbw}]	0.280052	0.272776	0.287512	0.301393	0.303042	0.246478	0.241206	0.166516	0.177219	0.162539	0.153521	0.153571	0.129058	0.132372	0.147999	0.143161	0.139476	0.116137	0.153011	0.122265	0.124761	0.137472	0.145873		219	l_oral_pontine_reticular_nucleus - [g/ml{SUVbw}]	0.674848	0.52584	0.4845	0.491089	0.508096	0.534648	0.507739	0.467525	0.459698	0.420138	0.394343	0.417588	0.344333	0.298878	0.30585	0.303445	0.275896	0.321893	0.297171
			421	l_parvicellular_part_of_the_ventral_posteromedial_nucleus - [g/ml{SUVbw}]	0.191777	0.0888543	0.102835	0.168987	0.26603	0.184207	0.134855	0.128005	0.152342	0.076465	0.134579	0.0896165	0.0858416	0.0928986	0.0937302	0.0955549	0.0899538	0.0901041	0.112814	0.0917906	0.0970002	0.0789423	0.0864444		449	l_paraabducens_nucleus - [g/ml{SUVbw}]	0.674041	0.388108	0.638264	0.669001	0.579094	0.581258	0.539968	0.499723	0.630159	0.431177	0.390382	0.434187	0.417851	0.378193	0.340833	0.345927	0.301281	0.328564	0.309891
			485	l_peduncle_of_the_flocculus - [g/ml{SUVbw}]	0.309608	0.286554	0.394955	0.344248	0.25806	0.265881	0.227632	0.244666	0.252077	0.16894	0.174936	0.221008	0.167022	0.117356	0.143331	0.145441	0.139662	0.134957	0.166645	0.156526	0.129733	0.146464	0.156962		387	l_paracentral_nucleus - [g/ml{SUVbw}]	0.409811	0.206779	0.32066	0.304633	0.321332	0.250606	0.212423	0.260739	0.228487	0.23153	0.209661	0.191121	0.163354	0.136817	0.167505	0.131419	0.133185	0.110022	0.116849
			483	l_peduncle_of_the_paraflocculus - [g/ml{SUVbw}]	0.360619	0.295201	0.372789	0.308414	0.294324	0.253552	0.229237	0.201773	0.252834	0.170442	0.152493	0.18559	0.156152	0.115805	0.140826	0.131547	0.142349	0.143162	0.156028	0.159933	0.127106	0.148307	0.158414		409	l_parafascicular_nucleus - [g/ml{SUVbw}]	0.548967	0.226986	0.35664	0.26269	0.336602	0.296266	0.304201	0.24929	0.246387	0.245438	0.24396	0.194537	0.156463	0.160713	0.158828	0.133511	0.119654	0.118117	0.115861
			227	l_pedunculopontine_tegmental_nucleus - [g/ml{SUVbw}]	0.484024	0.330614	0.23683	0.17906	0.292461	0.219849	0.218214	0.261788	0.222117	0.167864	0.172789	0.156777	0.182315	0.145763	0.115374	0.127057	0.113794	0.11072	0.121033	0.10429	0.117286	0.11849	0.121936		495	l_paralaminar_nucleus_of_the_amygdala - [g/ml{SUVbw}]	0.626322	0.552557	0.620068	0.69288	0.718256	0.682651	0.616199	0.596473	0.568802	0.54291	0.616247	0.509372	0.500829	0.46571	0.470292	0.422219	0.458237	0.442038	0.452341
			313	l_periamygdalar_area - [g/ml{SUVbw}]	0.500594	0.703562	0.713906	0.328727	0.42517	0.332095	0.231035	0.237202	0.220649	0.214892	0.226969	0.150016	0.182726	0.168823	0.208674	0.184972	0.143568	0.143891	0.173876	0.179823	0.182518	0.187658	0.163118		491	l_paranigral_nucleus - [g/ml{SUVbw}]	1.45887	0.926565	1.12806	1.02968	1.137	0.804061	0.879235	0.859802	0.775022	0.751375	0.747977	0.739149	0.734915	0.632177	0.566829	0.464496	0.507077	0.534216	0.537669
			131	l_pineal_body - [g/ml{SUVbw}]	0.383922	0.556583	0.380764	0.224539	0.430339	0.395761	0.299749	0.180089	0.242871	0.169435	0.210613	0.20423	0.155468	0.148015	0.152466	0.18026	0.178055	0.136052	0.198045	0.164001	0.174543	0.15649	0.160191		503	l_parasubicular_area - [g/ml{SUVbw}]	0.496728	0.453227	0.423944	0.462788	0.383643	0.415951	0.413773	0.388608	0.375009	0.354689	0.331658	0.350153	0.314025	0.292177	0.267182	0.236835	0.226457	0.254732	0.264307
			501	l_pineal_stalk - [g/ml{SUVbw}]	0.365433	0.385315	0.243011	0.323695	0.343173	0.440175	0.340492	0.174385	0.366089	0.137197	0.232927	0.224159	0.133378	0.150399	0.14663	0.155773	0.173646	0.12798	0.221408	0.166192	0.170406	0.164156	0.159239		253	l_pars_compacta - [g/ml{SUVbw}]	1.52778	0.837033	0.720792	0.88153	0.740456	0.787514	0.711455	0.652233	0.647174	0.553891	0.58754	0.636958	0.552241	0.513176	0.463912	0.411482	0.411585	0.430608	0.413727
			195	l_pontine_nuclei - [g/ml{SUVbw}]	0.761965	0.53573	0.540859	0.560808	0.470916	0.418398	0.422803	0.356636	0.399066	0.33675	0.296376	0.331768	0.275825	0.25332	0.25931	0.260898	0.254088	0.289524	0.304069	0.27711	0.292202	0.322622	0.339364		199	l_pars_reticulata - [g/ml{SUVbw}]	1.2604	0.619946	0.700224	0.749604	0.70492	0.572305	0.591639	0.571539	0.528836	0.482855	0.508496	0.504903	0.494156	0.448224	0.382749	0.326309	0.33581	0.363427	0.367378
			183	l_postcentral_gyrus - [g/ml{SUVbw}]	0.142278	0.153253	0.201308	0.13389	0.148351	0.141711	0.153426	0.186625	0.146783	0.136675	0.170458	0.14164	0.129998	0.141667	0.158146	0.146389	0.165152	0.168673	0.185337	0.187735	0.195263	0.198639	0.199303		411	l_parvicellular_part_of_the_ventral_posteromedial_nucleus - [g/ml{SUVbw}]	0.557338	0.27354	0.448846	0.402007	0.325287	0.30694	0.284081	0.302197	0.233794	0.256714	0.227708	0.241237	0.19832	0.174361	0.184772	0.16794	0.122486	0.137639	0.146183
			277	l_postcommissural_fornix - [g/ml{SUVbw}]	0.29605	0.251549	0.30711	0.25156	0.40787	0.249935	0.22881	0.17497	0.239436	0.154846	0.186191	0.111899	0.134678	0.182984	0.147336	0.161898	0.125757	0.129001	0.157681	0.138867	0.133952	0.156975	0.163833		565	l_parvicellular_reticular_nucleus - [g/ml{SUVbw}]	0.814508	0.751753	0.749091	0.677763	0.722042	0.694509	0.697536	0.676534	0.661634	0.561626	0.506004	0.585653	0.475536	0.44039	0.405021	0.418089	0.360386	0.41399	0.392348
			105	l_posterior_cingulate_gyrus - [g/ml{SUVbw}]	0.198149	0.176306	0.254817	0.201168	0.21292	0.220251	0.150645	0.214263	0.124547	0.137395	0.119946	0.154594	0.148855	0.117302	0.117233	0.11169	0.130388	0.10528	0.109262	0.114874	0.132383	0.116859	0.116717		467	l_peduncle_of_the_flocculus - [g/ml{SUVbw}]	0.910768	0.833372	0.52146	0.508741	0.68535	0.642831	0.518846	0.513884	0.54859	0.490646	0.532307	0.463491	0.503482	0.436678	0.427583	0.455839	0.462042	0.514214	0.569496
			163	l_posterior_column_of_the_fornix - [g/ml{SUVbw}]	0.150435	0.107783	0.144446	0.414368	0.125532	0.162933	0.174421	0.184086	0.139376	0.100034	0.119414	0.101981	0.104942	0.0938394	0.0936001	0.0999172	0.11125	0.105428	0.110241	0.112992	0.105901	0.116645	0.117464		465	l_peduncle_of_the_paraflocculus - [g/ml{SUVbw}]	0.966272	0.850732	0.503841	0.509255	0.709007	0.551007	0.562873	0.483802	0.539945	0.451789	0.568325	0.468334	0.533118	0.426764	0.427618	0.475005	0.501119	0.547816	0.619369
			199	l_posterior_commissure - [g/ml{SUVbw}]	0.451177	0.229272	0.259525	0.296541	0.259788	0.405783	0.27658	0.207294	0.380692	0.114871	0.213945	0.214567	0.144496	0.134754	0.128788	0.121431	0.154221	0.119218	0.186407	0.124946	0.151951	0.127487	0.126797		221	l_pedunculopontine_tegmental_nucleus - [g/ml{SUVbw}]	0.71335	0.439906	0.400656	0.429913	0.417433	0.371212	0.396651	0.381134	0.329771	0.354241	0.300883	0.332446	0.274516	0.223212	0.249106	0.221113	0.182762	0.200865	0.211803
			113	l_posterior_parahippocampal_gyrus - [g/ml{SUVbw}]	0.600586	0.334319	0.229935	0.42963	0.330418	0.314084	0.262583	0.23488	0.276683	0.248941	0.242236	0.202548	0.178222	0.181155	0.167548	0.151539	0.186069	0.211126	0.189399	0.196589	0.167039	0.186589	0.213022		127	l_pineal_body - [g/ml{SUVbw}]	0.51098	0.35337	0.357897	0.3353	0.395381	0.295958	0.341734	0.328484	0.274519	0.309557	0.26238	0.223635	0.192458	0.160171	0.182031	0.157908	0.141307	0.127172	0.149816
			295	l_posterior_part_of_the_anterior_commissure - [g/ml{SUVbw}]	0.271888	0.225456	0.225259	0.255887	0.193846	0.244596	0.213057	0.284718	0.217751	0.223669	0.194876	0.166107	0.165244	0.131704	0.121156	0.134637	0.130739	0.12612	0.127579	0.134501	0.149931	0.105369	0.132847		485	l_pineal_stalk - [g/ml{SUVbw}]	0.389564	0.242345	0.27067	0.277998	0.357535	0.261357	0.289942	0.294418	0.185934	0.211439	0.195155	0.161535	0.144067	0.147897	0.145782	0.124401	0.101198	0.113933	0.115906
			489	l_posterodorsal_tegmental_nucleus - [g/ml{SUVbw}]	0.185227	0.208144	0.187342	0.108871	0.196604	0.158971	0.180154	0.254374	0.194245	0.16677	0.133537	0.126204	0.103552	0.130633	0.0994904	0.104476	0.0950706	0.0940148	0.090781	0.0992541	0.10796	0.110641	0.102301		187	l_pontine_nuclei - [g/ml{SUVbw}]	0.86246	0.826783	0.825655	0.863675	0.810429	0.779227	0.800428	0.7151	0.674123	0.639726	0.669746	0.662142	0.609579	0.585621	0.530908	0.484757	0.483667	0.523674	0.538228
			451	l_posteroventral_cochlear_nucleus - [g/ml{SUVbw}]	0.303192	0.264177	0.415024	0.329085	0.263119	0.254649	0.213689	0.232262	0.252436	0.150916	0.183721	0.207908	0.172071	0.10935	0.145853	0.140236	0.132504	0.135187	0.190616	0.164412	0.143524	0.152837	0.170264		177	l_postcentral_gyrus - [g/ml{SUVbw}]	0.36886	0.323664	0.331956	0.300003	0.295204	0.280235	0.259528	0.264082	0.239482	0.248697	0.227613	0.206656	0.202317	0.202635	0.180196	0.171536	0.159862	0.174773	0.169209
			233	l_precentral_gyrus - [g/ml{SUVbw}]	0.198786	0.2251	0.210345	0.207578	0.205753	0.221248	0.185229	0.211006	0.157661	0.187434	0.180243	0.169389	0.151251	0.156974	0.179829	0.189541	0.192218	0.199743	0.213183	0.21712	0.238903	0.231016	0.242841		271	l_postcommissural_fornix - [g/ml{SUVbw}]	1.24682	0.712014	0.678456	0.606624	0.703656	0.646291	0.587658	0.50524	0.537478	0.489687	0.492419	0.524621	0.452512	0.397235	0.379558	0.338969	0.333143	0.361769	0.355775
			499	l_precommissural_nucleus - [g/ml{SUVbw}]	0.355667	0.216141	0.226164	0.385715	0.260838	0.379576	0.237213	0.179789	0.409749	0.0926484	0.230352	0.198839	0.132386	0.140959	0.134944	0.130765	0.157297	0.12774	0.194095	0.133007	0.153002	0.129213	0.144295		103	l_posterior_cingulate_gyrus - [g/ml{SUVbw}]	0.48483	0.364637	0.335598	0.342326	0.32485	0.303534	0.324579	0.318588	0.304191	0.296155	0.278213	0.246652	0.239068	0.207775	0.185164	0.155276	0.176274	0.161252	0.159751
			19	l_precuneus (1) - [g/ml{SUVbw}]	0.277408	0.456841	0.474999	0.328269	0.287836	0.2871	0.275618	0.286411	0.235855	0.201008	0.195735	0.184772	0.217459	0.185739	0.169907	0.16593	0.178341	0.174529	0.169772	0.176147	0.164118	0.17406	0.166831		159	l_posterior_column_of_the_fornix - [g/ml{SUVbw}]	0.432602	0.186211	0.229254	0.299148	0.300339	0.258616	0.234892	0.258097	0.243262	0.237685	0.199025	0.18168	0.167828	0.149433	0.147432	0.128735	0.122608	0.130671	0.126331
			1193	l_precuneus (2) - [g/ml{SUVbw}]	0.277408	0.456841	0.474999	0.328269	0.287836	0.2871	0.275618	0.286411	0.235855	0.201008	0.195735	0.184772	0.217459	0.185739	0.169907	0.16593	0.178341	0.174529	0.169772	0.176147	0.164118	0.17406	0.166831		191	l_posterior_commissure - [g/ml{SUVbw}]	0.42249	0.264411	0.291755	0.317399	0.344669	0.292022	0.316302	0.269316	0.197898	0.221842	0.209931	0.173109	0.158068	0.157091	0.154628	0.131374	0.109039	0.122388	0.124485
			315	l_prepyriform_area - [g/ml{SUVbw}]	0.551379	0.315751	0.316508	0.319361	0.258834	0.224545	0.243109	0.269538	0.361348	0.226896	0.215582	0.171173	0.212479	0.197347	0.174415	0.19094	0.169387	0.196155	0.190182	0.172442	0.249281	0.190406	0.246815		109	l_posterior_parahippocampal_gyrus - [g/ml{SUVbw}]	0.542734	0.449215	0.4279	0.426326	0.408655	0.407828	0.416101	0.396896	0.372959	0.362071	0.316576	0.358448	0.307448	0.282924	0.277968	0.237467	0.234163	0.272944	0.270283
			523	l_presubiculum - [g/ml{SUVbw}]	0.422067	0.424525	0.205331	0.44881	0.307384	0.262517	0.248091	0.226419	0.248774	0.231594	0.205549	0.191759	0.170687	0.142653	0.166384	0.14908	0.169149	0.183284	0.186632	0.186102	0.164343	0.188867	0.186117		289	l_posterior_part_of_the_anterior_commissure - [g/ml{SUVbw}]	0.599685	0.535624	0.377316	0.319419	0.466583	0.447745	0.3778	0.35334	0.31822	0.287692	0.322502	0.250264	0.254164	0.240486	0.197934	0.22137	0.212125	0.202466	0.209894
			439	l_principal_sensory_nucleus_of_the_trigeminal_nerve - [g/ml{SUVbw}]	0.530064	0.357116	0.345461	0.274809	0.243661	0.292033	0.244896	0.447269	0.25538	0.137241	0.252807	0.18055	0.191723	0.150025	0.129935	0.12926	0.102851	0.115665	0.137942	0.116019	0.114485	0.122056	0.136833		471	l_posterodorsal_tegmental_nucleus - [g/ml{SUVbw}]	0.585912	0.34205	0.36708	0.453747	0.450763	0.424482	0.432822	0.347605	0.404917	0.35325	0.306113	0.336952	0.269088	0.235406	0.250485	0.262103	0.223396	0.272564	0.225771
		Striatum	161	l_putamen - [g/ml{SUVbw}]	0.249445	0.218167	0.226596	0.200395	0.192552	0.173528	0.180831	0.159617	0.181734	0.145202	0.1524	0.140272	0.189459	0.114553	0.11355	0.116649	0.121074	0.124342	0.130079	0.13571	0.144739	0.13304	0.149727		157	l_putamen - [g/ml{SUVbw}]	0.559391	0.483425	0.3999	0.377414	0.421264	0.393927	0.344287	0.339675	0.319017	0.308948	0.308995	0.272503	0.278264	0.243029	0.208834	0.213142	0.217494	0.234617	0.230608
			41	l_pyramidal_decussation - [g/ml{SUVbw}]	0.612946	0.383435	0.632363	0.500018	0.45923	0.322205	0.357282	0.32386	0.204016	0.271622	0.221794	0.261731	0.263085	0.21548	0.219211	0.231381	0.260673	0.244939	0.277852	0.247383	0.265821	0.270944	0.288027		227	l_precentral_gyrus - [g/ml{SUVbw}]	0.40017	0.355581	0.31863	0.319811	0.303364	0.30062	0.303112	0.276482	0.278009	0.270193	0.254107	0.248508	0.235257	0.231518	0.206399	0.205549	0.203984	0.205954	0.218444
			83	l_pyramidal_tract - [g/ml{SUVbw}]	0.343663	0.308025	0.497635	0.403592	0.367849	0.263856	0.274919	0.265734	0.292822	0.267008	0.248406	0.220461	0.214086	0.179145	0.193751	0.189976	0.218213	0.2282	0.233736	0.227667	0.236797	0.268906	0.242367		483	l_precommissural_nucleus - [g/ml{SUVbw}]	0.394841	0.251119	0.273639	0.312105	0.338222	0.283353	0.292799	0.260687	0.186375	0.211975	0.195117	0.164152	0.150424	0.151261	0.148586	0.125141	0.103002	0.117355	0.115485
			167	l_reticular_nucleus_of_the_thalamus - [g/ml{SUVbw}]	0.153837	0.113283	0.105609	0.233837	0.137426	0.119678	0.167515	0.15268	0.0790657	0.147033	0.0887503	0.0756034	0.0929868	0.0740253	0.0907487	0.0769225	0.0915136	0.0944428	0.0856833	0.0831823	0.0907716	0.0933365	0.0896429		19	l_precuneus (1) - [g/ml{SUVbw}]	0.41261	0.300072	0.348165	0.259802	0.315114	0.288046	0.260733	0.255266	0.25226	0.230609	0.204465	0.201706	0.19349	0.173284	0.15552	0.139511	0.133398	0.129432	0.128909
			193	l_reticulotegmental_nucleus - [g/ml{SUVbw}]	0.151207	0.376412	0.375	0.25376	0.322788	0.146476	0.208233	0.213572	0.153245	0.141161	0.128982	0.144399	0.134202	0.134671	0.132455	0.104315	0.117943	0.119641	0.150951	0.118349	0.15839	0.130095	0.135176		1151	l_precuneus (2) - [g/ml{SUVbw}]	0.41261	0.300072	0.348165	0.259802	0.315114	0.288046	0.260733	0.255266	0.25226	0.230609	0.204465	0.201706	0.19349	0.173284	0.15552	0.139511	0.133398	0.129432	0.128909
			387	l_reuniens_nucleus - [g/ml{SUVbw}]	0.209129	0.0905357	0.221718	0.180213	0.289599	0.190578	0.205552	0.1532	0.151472	0.151617	0.1149	0.113989	0.0907827	0.152411	0.119573	0.130131	0.0878711	0.102544	0.126423	0.107973	0.0898542	0.105951	0.144027		1171	l_precuneus_wm (1) - [g/ml{SUVbw}]	0.344912	0.239745	0.304545	0.281155	0.268879	0.259622	0.239838	0.235921	0.233011	0.206937	0.191107	0.182635	0.167677	0.149587	0.147834	0.125475	0.127979	0.124986	0.122328
			539	l_rostrum_of_the_corpus_callosum - [g/ml{SUVbw}]	0.121491	0.189112	0.332271	0.0888562	0.0947421	0.145691	0.0967555	0.245158	0.124816	0.131762	0.0965286	0.163201	0.10831	0.135508	0.089588	0.139296	0.134411	0.107539	0.110235	0.113385	0.111029	0.135666	0.0915434		305	l_prepyriform_area - [g/ml{SUVbw}]	0.899404	0.547278	0.613067	0.59283	0.676493	0.587097	0.529349	0.572592	0.447967	0.428808	0.560585	0.371758	0.405956	0.381993	0.391289	0.351897	0.389222	0.38016	0.371233
			447	l_rubrospinal_tract - [g/ml{SUVbw}]	0.29364	0.242031	0.45294	0.287483	0.397908	0.268944	0.250944	0.163069	0.127904	0.203291	0.197507	0.188296	0.154729	0.1453	0.159538	0.169084	0.207505	0.193504	0.210246	0.226761	0.25504	0.246949	0.265541		507	l_presubiculum - [g/ml{SUVbw}]	0.401321	0.411745	0.405969	0.433819	0.37142	0.377936	0.403693	0.355999	0.366018	0.342717	0.313735	0.336425	0.29255	0.272996	0.250336	0.220199	0.220959	0.236871	0.250408
			445	l_septum_pellucidum - [g/ml{SUVbw}]	0.199072	0.174043	0.25922	0.107305	0.0875656	0.12636	0.120323	0.197962	0.119481	0.140369	0.090876	0.122236	0.116278	0.124548	0.0836421	0.117092	0.105725	0.0983018	0.0919109	0.0939349	0.0916364	0.106236	0.0767475	248	431	l_posteroventral_cochlear_nucleus - [g/ml{SUVbw}]	1.27676	1.57631	0.921301	0.940678	1.34342	1.25478	0.971279	1.06425	1.1165	0.860016	0.946819	0.84212	0.897863	0.700134	0.660207	0.667262	0.598803	0.660816	0.650167
			357	l_simple_lobule - [g/ml{SUVbw}]	0.254499	0.274494	0.35401	0.305168	0.301352	0.240951	0.203017	0.183122	0.210017	0.165436	0.167647	0.142238	0.146474	0.151555	0.129938	0.110683	0.135734	0.126017	0.133696	0.129747	0.132053	0.144026	0.119587		41	l_pyramidal_decussation - [g/ml{SUVbw}]	0.30636	0.496784	0.67516	0.705074	0.72685	0.827679	0.782248	0.693615	0.621016	0.67035	0.653094	0.568282	0.528042	0.558002	0.529286	0.422349	0.477866	0.487634	0.509806
			69	l_solitary_nucleus - [g/ml{SUVbw}]	0.200185	0.152772	0.298143	0.23619	0.216509	0.162548	0.15892	0.154945	0.096404	0.17904	0.124421	0.132777	0.119916	0.107283	0.123582	0.111201	0.116975	0.105523	0.111737	0.113043	0.153368	0.13473	0.133094		1193	l_pyramidal_decussation_wm - [g/ml{SUVbw}]	0.313882	0.550974	0.779268	0.763251	0.759442	0.864601	0.818319	0.730108	0.661291	0.717303	0.679983	0.620208	0.568627	0.595137	0.555866	0.44851	0.497752	0.517161	0.544685
			71	l_solitary_tract - [g/ml{SUVbw}]	0.215157	0.139752	0.318705	0.229442	0.226468	0.156082	0.156474	0.148113	0.0951143	0.175628	0.131146	0.133106	0.120124	0.107701	0.124041	0.112619	0.118588	0.105078	0.11607	0.113321	0.154259	0.142677	0.134301		81	l_pyramidal_tract - [g/ml{SUVbw}]	0.480712	0.56611	0.637568	0.657714	0.632573	0.729292	0.706462	0.628312	0.571876	0.582767	0.586701	0.517917	0.486636	0.465227	0.444941	0.422987	0.422015	0.454674	0.463062
			29	l_spinal_trigeminal_tract_of_the_medulla - [g/ml{SUVbw}]	0.305404	0.207736	0.309525	0.217688	0.349219	0.220915	0.192797	0.15897	0.20219	0.17318	0.196988	0.176076	0.154791	0.1223	0.148729	0.141985	0.155267	0.153799	0.192155	0.176517	0.192397	0.193616	0.195333		163	l_reticular_nucleus_of_the_thalamus - [g/ml{SUVbw}]	0.428011	0.212406	0.286923	0.287269	0.238574	0.251234	0.222831	0.267047	0.204177	0.188382	0.198157	0.185267	0.179595	0.13895	0.15689	0.1302	0.1162	0.118028	0.121906
			117	l_splenium_of_the_corpus_callosum - [g/ml{SUVbw}]	0.107977	0.137952	0.130497	0.337909	0.114195	0.183168	0.126856	0.262401	0.128038	0.100846	0.130922	0.0901221	0.129794	0.092069	0.0860627	0.0917058	0.113836	0.117298	0.113058	0.0958371	0.12071	0.134048	0.149514		185	l_reticulotegmental_nucleus - [g/ml{SUVbw}]	1.22766	1.00011	1.10357	0.988783	0.994913	0.794669	0.835653	0.759575	0.755731	0.819665	0.726902	0.72071	0.671545	0.581225	0.540985	0.453815	0.491667	0.536007	0.543265
			325	l_straight_gyrus - [g/ml{SUVbw}]	0.517246	0.266809	0.324802	0.29458	0.385598	0.267705	0.252459	0.331765	0.215202	0.228875	0.221185	0.27679	0.202195	0.237722	0.222788	0.209202	0.244624	0.263048	0.310841	0.311627	0.326129	0.338625	0.342163		377	l_reuniens_nucleus - [g/ml{SUVbw}]	0.831174	0.371665	0.435247	0.297659	0.380873	0.372545	0.355272	0.284046	0.320555	0.267909	0.29818	0.266052	0.249979	0.183312	0.210041	0.174505	0.160817	0.162893	0.184045
			525	l_stratum_pyramidale_of_the_CA1_field - [g/ml{SUVbw}]	0.300627	0.148065	0.257493	0.212	0.237909	0.160906	0.177251	0.223287	0.159711	0.168704	0.159345	0.1402	0.147033	0.136038	0.144598	0.147593	0.136933	0.149055	0.145979	0.176545	0.162655	0.171645	0.170561		523	l_rostrum_of_the_corpus_callosum - [g/ml{SUVbw}]	0.332029	0.467069	0.351657	0.361819	0.38311	0.345056	0.360951	0.368033	0.280666	0.293821	0.238199	0.274367	0.260693	0.209269	0.22209	0.196116	0.186075	0.172659	0.212465
			529	l_stratum_pyramidale_of_the_CA2_field - [g/ml{SUVbw}]	0.247894	0.153921	0.255624	0.212984	0.26446	0.135887	0.160875	0.23089	0.158811	0.138091	0.135061	0.122165	0.128809	0.120061	0.128905	0.130417	0.109445	0.127573	0.116309	0.15	0.128149	0.129793	0.129312		429	l_septum_pellucidum - [g/ml{SUVbw}]	0.346116	0.46993	0.352532	0.308072	0.379852	0.336002	0.330277	0.343657	0.255515	0.277539	0.218459	0.256201	0.243044	0.192668	0.208084	0.161894	0.147097	0.141722	0.157778
			527	l_stratum_pyramidale_of_the_CA3_field - [g/ml{SUVbw}]	0.287958	0.231929	0.21244	0.312458	0.251875	0.190087	0.223969	0.175941	0.19811	0.187015	0.152408	0.15845	0.138773	0.109356	0.136032	0.128896	0.119929	0.129571	0.127049	0.144105	0.123497	0.13992	0.130406		347	l_simple_lobule - [g/ml{SUVbw}]	0.55557	0.415062	0.439725	0.354581	0.383196	0.347806	0.330172	0.325549	0.304253	0.279582	0.301607	0.256008	0.247425	0.229825	0.192185	0.186219	0.187871	0.184234	0.200924
			509	l_stratum_radiatum - [g/ml{SUVbw}]	0.344519	0.252588	0.265998	0.273704	0.264897	0.20753	0.23148	0.206298	0.189715	0.201767	0.172378	0.164941	0.155358	0.130305	0.161924	0.141153	0.14076	0.14639	0.150696	0.163148	0.159805	0.177293	0.166734		69	l_solitary_nucleus - [g/ml{SUVbw}]	0.864964	1.05493	1.01506	1.01346	1.01119	0.960434	0.947885	0.923574	0.945062	0.759984	0.756449	0.764186	0.692453	0.705021	0.595602	0.548858	0.534892	0.519095	0.544922
			215	l_stria_medullaris - [g/ml{SUVbw}]	0.338534	0.15086	0.191132	0.371066	0.158992	0.186961	0.201703	0.123899	0.258597	0.120646	0.131376	0.166454	0.113127	0.138369	0.109037	0.111609	0.132411	0.0973053	0.143257	0.157049	0.129611	0.121387	0.147409		29	l_spinal_trigeminal_tract_of_the_medulla - [g/ml{SUVbw}]	1.14162	1.72638	1.53089	1.40616	1.44894	1.49319	1.42764	1.33312	1.38852	1.13885	1.15776	1.14486	0.995057	0.92564	0.788291	0.737369	0.661496	0.691286	0.682083
			153	l_stria_terminalis - [g/ml{SUVbw}]	0.268283	0.253613	0.268373	0.270153	0.221705	0.191966	0.186169	0.173706	0.188923	0.179365	0.144307	0.138441	0.132787	0.0983665	0.136633	0.118794	0.113819	0.112813	0.114328	0.122871	0.116856	0.127591	0.115932		1181	l_spinal_trigeminal_tract_of_the_medulla_wm - [g/ml{SUVbw}]	1.18071	1.60811	1.31521	1.15263	1.32497	1.28393	1.23714	1.20778	1.265	1.01749	0.972527	0.999158	0.911656	0.811379	0.726889	0.727007	0.631548	0.675214	0.657664
			521	l_subiculum - [g/ml{SUVbw}]	0.411324	0.288962	0.229145	0.388225	0.315633	0.237525	0.243092	0.23164	0.229499	0.229939	0.210084	0.181219	0.190223	0.152596	0.174435	0.163693	0.186459	0.196263	0.185174	0.211936	0.212412	0.22536	0.217115		113	l_splenium_of_the_corpus_callosum - [g/ml{SUVbw}]	0.40454	0.188672	0.240219	0.301061	0.294631	0.275564	0.254397	0.252625	0.221401	0.25432	0.214887	0.189421	0.197776	0.158754	0.146651	0.133417	0.142765	0.137475	0.149696
			429	l_subparafascicular_nucleus - [g/ml{SUVbw}]	0.340817	0.0978206	0.241642	0.20671	0.219227	0.240364	0.155413	0.17602	0.124127	0.0911712	0.151318	0.161223	0.0966035	0.101695	0.116279	0.104126	0.103061	0.108657	0.117874	0.0864669	0.110902	0.0930202	0.105387		315	l_straight_gyrus - [g/ml{SUVbw}]	0.454811	0.370913	0.391348	0.437354	0.364328	0.402012	0.389305	0.386121	0.343645	0.343868	0.324903	0.338365	0.304909	0.285669	0.272818	0.264807	0.281252	0.283083	0.327292
			397	l_substantia_innominata - [g/ml{SUVbw}]	0.397699	0.494031	0.408322	0.239073	0.312843	0.271497	0.179904	0.246467	0.2642	0.253447	0.20254	0.121099	0.151867	0.157451	0.16404	0.173021	0.138913	0.148988	0.15912	0.174714	0.20905	0.174198	0.177682		509	l_stratum_pyramidale_of_the_CA1_field - [g/ml{SUVbw}]	0.337323	0.27021	0.281775	0.321588	0.302001	0.322161	0.29332	0.254205	0.29957	0.269992	0.272014	0.242402	0.220805	0.232568	0.199423	0.203341	0.197111	0.213498	0.21451
			93	l_superior_cerebellar_peduncle_of_the_pons - [g/ml{SUVbw}]	0.401167	0.29858	0.269465	0.205693	0.235873	0.271682	0.221177	0.31911	0.241337	0.184185	0.204639	0.16887	0.166184	0.159473	0.116288	0.126155	0.120093	0.110388	0.120409	0.111608	0.117696	0.115107	0.122089		513	l_stratum_pyramidale_of_the_CA2_field - [g/ml{SUVbw}]	0.358096	0.244755	0.257164	0.324201	0.274465	0.296553	0.264992	0.234953	0.257543	0.230597	0.244486	0.218167	0.19065	0.202795	0.161984	0.169661	0.160456	0.164507	0.168741
			581	l_superior_cistern - [g/ml{SUVbw}]	0.408523	0.597225	0.447944	0.216925	0.411355	0.36186	0.247418	0.22014	0.254572	0.275381	0.192761	0.200619	0.188991	0.170494	0.15626	0.179078	0.166199	0.151591	0.180119	0.13515	0.155094	0.142478	0.155482		511	l_stratum_pyramidale_of_the_CA3_field - [g/ml{SUVbw}]	0.364616	0.31274	0.333937	0.355767	0.361434	0.309102	0.303831	0.288151	0.304678	0.254098	0.257941	0.262188	0.232208	0.226503	0.188335	0.182728	0.179886	0.17965	0.191304
			375	l_superior_colliculus - [g/ml{SUVbw}]	0.406222	0.610607	0.385248	0.208681	0.426317	0.343495	0.251323	0.189145	0.241919	0.212216	0.18839	0.19039	0.160272	0.147566	0.147239	0.188791	0.165015	0.1404	0.180836	0.143799	0.165006	0.154263	0.157889		493	l_stratum_radiatum - [g/ml{SUVbw}]	0.363947	0.378453	0.389523	0.415227	0.40097	0.388922	0.36668	0.34016	0.36949	0.325684	0.326459	0.317989	0.285198	0.287656	0.253868	0.243281	0.239385	0.241997	0.259994
			293	l_superior_frontal_gyrus - [g/ml{SUVbw}]	0.17229	0.194976	0.193423	0.189445	0.224208	0.197548	0.195213	0.17218	0.187826	0.16934	0.169724	0.170599	0.17208	0.167849	0.16667	0.186512	0.20025	0.215252	0.226403	0.220142	0.253271	0.253936	0.253456		205	l_stria_medullaris - [g/ml{SUVbw}]	0.46735	0.253047	0.297753	0.289473	0.343686	0.280096	0.279798	0.272233	0.249484	0.247322	0.217915	0.198858	0.176585	0.163231	0.16393	0.133059	0.127308	0.118934	0.12677
			585	l_superior_olive - [g/ml{SUVbw}]	0.223519	0.193733	0.347273	0.312112	0.253913	0.272546	0.29546	0.241429	0.295399	0.232303	0.208243	0.236959	0.176063	0.157093	0.148978	0.163503	0.124361	0.173895	0.207686	0.169527	0.182608	0.213337	0.208515		149	l_stria_terminalis - [g/ml{SUVbw}]	0.508269	0.308456	0.36358	0.399509	0.335405	0.340414	0.320348	0.341665	0.308092	0.288897	0.254319	0.282044	0.243452	0.24471	0.210148	0.187648	0.179415	0.180502	0.193004
			21	l_superior_parietal_lobule (1) - [g/ml{SUVbw}]	0.160737	0.265785	0.274746	0.246208	0.268112	0.190043	0.194438	0.219662	0.177155	0.179588	0.170995	0.169899	0.172611	0.157126	0.156529	0.161333	0.167519	0.163706	0.168506	0.167121	0.173636	0.186284	0.17533		505	l_subiculum - [g/ml{SUVbw}]	0.32104	0.41056	0.416459	0.412181	0.393703	0.375025	0.413111	0.348984	0.38513	0.365786	0.333722	0.341049	0.3014	0.286026	0.274124	0.245971	0.259176	0.266279	0.280214
			1195	l_superior_parietal_lobule (2) - [g/ml{SUVbw}]	0.160737	0.265785	0.274746	0.246208	0.268112	0.190043	0.194438	0.219662	0.177155	0.179588	0.170995	0.169899	0.172611	0.157126	0.156529	0.161333	0.167519	0.163706	0.168506	0.167121	0.173636	0.186284	0.17533		417	l_subparafascicular_nucleus - [g/ml{SUVbw}]	0.78779	0.26613	0.471837	0.373264	0.39683	0.355829	0.353067	0.312923	0.330192	0.277541	0.307681	0.257465	0.231917	0.215185	0.208003	0.177053	0.157861	0.162667	0.177749
			361	l_superior_semilunar_lobule - [g/ml{SUVbw}]	0.24114	0.296451	0.311351	0.223654	0.296847	0.249007	0.196688	0.162959	0.204552	0.204695	0.187572	0.184794	0.16516	0.17534	0.143615	0.141829	0.142522	0.14995	0.144298	0.154363	0.168406	0.157599	0.15413		389	l_substantia_innominata - [g/ml{SUVbw}]	0.866719	0.595538	0.594967	0.618199	0.72243	0.61251	0.547235	0.578781	0.482747	0.472356	0.502151	0.408852	0.39423	0.393986	0.360332	0.339402	0.34834	0.347673	0.357138
			89	l_superior_temporal_gyrus - [g/ml{SUVbw}]	0.33104	0.326215	0.269503	0.286706	0.238375	0.253724	0.231936	0.232383	0.216023	0.191541	0.188802	0.179405	0.164041	0.174368	0.15597	0.172281	0.180039	0.187985	0.196049	0.200442	0.200836	0.208188	0.211606		211	l_superior_cerebellar_peduncle_of_the_midbrain - [g/ml{SUVbw}]	0.704269	0.421643	0.38976	0.436794	0.419929	0.377414	0.392972	0.386283	0.340843	0.350458	0.302017	0.341765	0.26337	0.225237	0.246275	0.22953	0.18225	0.200811	0.212252
			411	l_superior_vestibular_nucleus - [g/ml{SUVbw}]	0.207732	0.213798	0.231031	0.159058	0.237003	0.234889	0.207188	0.273978	0.194431	0.228863	0.192656	0.163213	0.119977	0.160467	0.110646	0.115427	0.119644	0.100405	0.104066	0.118276	0.127864	0.110554	0.112341		93	l_superior_cerebellar_peduncle_of_the_pons - [g/ml{SUVbw}]	0.657571	0.365457	0.416486	0.493464	0.405897	0.382065	0.389038	0.403125	0.376894	0.337754	0.298108	0.36061	0.244543	0.237109	0.229626	0.249146	0.200167	0.223685	0.204785
			191	l_suprageniculate_nucleus - [g/ml{SUVbw}]	0.256892	0.128173	0.100322	0.279915	0.279824	0.115598	0.168193	0.173925	0.177544	0.129756	0.163519	0.109172	0.0779224	0.166251	0.1052	0.111331	0.0944039	0.114809	0.119343	0.108959	0.0961552	0.0962402	0.101869		559	l_superior_cistern - [g/ml{SUVbw}]	0.592174	0.417835	0.397002	0.419117	0.350307	0.327428	0.346099	0.399031	0.314772	0.346391	0.286779	0.271249	0.224675	0.19786	0.190356	0.1833	0.151582	0.155252	0.158338
			79	l_supramarginal_gyrus - [g/ml{SUVbw}]	0.193739	0.204958	0.202428	0.205022	0.188158	0.165306	0.19279	0.148092	0.164808	0.155808	0.159618	0.149819	0.14694	0.153536	0.14201	0.145531	0.158501	0.151715	0.158356	0.174178	0.171421	0.171042	0.175891		365	l_superior_colliculus - [g/ml{SUVbw}]	0.513833	0.402351	0.370487	0.393527	0.359329	0.293488	0.317281	0.342286	0.265056	0.291298	0.260246	0.222074	0.211356	0.176631	0.172528	0.158436	0.13784	0.144933	0.155888
			297	l_supraoptic_nucleus - [g/ml{SUVbw}]	0.380403	0.815669	0.513745	0.231027	0.39545	0.322893	0.167402	0.188012	0.212134	0.230641	0.202592	0.112661	0.131247	0.151829	0.181327	0.182488	0.128722	0.135009	0.156543	0.188775	0.184777	0.183666	0.157672		287	l_superior_frontal_gyrus - [g/ml{SUVbw}]	0.392349	0.378894	0.361533	0.319154	0.332453	0.309888	0.319209	0.299924	0.295981	0.283418	0.277008	0.255654	0.226213	0.236793	0.193339	0.188078	0.182647	0.179174	0.184016
			39	l_supraspinal_nucleus - [g/ml{SUVbw}]	0.581807	0.403874	0.621621	0.494759	0.447987	0.332563	0.364253	0.277909	0.201077	0.253014	0.23011	0.266613	0.258987	0.220282	0.225347	0.224518	0.269332	0.255295	0.278052	0.252254	0.285898	0.288167	0.303941		563	l_superior_olive - [g/ml{SUVbw}]	0.821767	0.967983	0.804281	0.722099	0.806591	0.910537	0.797362	0.769161	0.738439	0.619885	0.615721	0.653278	0.570516	0.5385	0.488612	0.4905	0.460436	0.539947	0.521284
			61	l_tectospinal_tract_of_the_medulla - [g/ml{SUVbw}]	0.518288	0.30098	0.65106	0.438333	0.428155	0.267451	0.295877	0.286429	0.178458	0.26096	0.202221	0.242156	0.227861	0.200117	0.194125	0.206056	0.24382	0.23223	0.252528	0.241765	0.251195	0.268702	0.262625		21	l_superior_parietal_lobule (1) - [g/ml{SUVbw}]	0.344386	0.241269	0.272452	0.279075	0.251783	0.233715	0.247251	0.216268	0.216527	0.201785	0.190501	0.18257	0.171087	0.133739	0.135705	0.131453	0.117761	0.117506	0.115552
			165	l_telodiencephalic_fissure - [g/ml{SUVbw}]	0.268698	0.258355	0.192282	0.369517	0.222381	0.223225	0.184942	0.149218	0.224834	0.114481	0.149827	0.151295	0.105689	0.125398	0.111203	0.136333	0.136357	0.111964	0.145008	0.149088	0.13789	0.135183	0.146896		1153	l_superior_parietal_lobule (2) - [g/ml{SUVbw}]	0.344386	0.241269	0.272452	0.279075	0.251783	0.233715	0.247251	0.216268	0.216527	0.201785	0.190501	0.18257	0.171087	0.133739	0.135705	0.131453	0.117761	0.117506	0.115552
			123	l_temporal_horn_of_the_lateral_ventricle - [g/ml{SUVbw}]	0.314557	0.190504	0.212263	0.248959	0.246072	0.188357	0.228805	0.1947	0.186599	0.191809	0.153639	0.1527	0.141373	0.122528	0.148284	0.13226	0.125285	0.139356	0.133696	0.155412	0.147307	0.155602	0.147263		1173	l_superior_parietal_lobule_wm (1) - [g/ml{SUVbw}]	0.365684	0.276974	0.267381	0.235309	0.235753	0.23939	0.244573	0.20437	0.217277	0.196965	0.181813	0.180169	0.170332	0.145068	0.137034	0.131717	0.116852	0.129666	0.115466
			241	l_temporal_white_matter - [g/ml{SUVbw}]	0.389391	0.342202	0.273152	0.279291	0.258129	0.275568	0.251469	0.250232	0.22759	0.219336	0.208488	0.190205	0.185722	0.176225	0.168221	0.172401	0.188336	0.201781	0.202162	0.217396	0.220445	0.218222	0.23401		351	l_superior_semilunar_lobule - [g/ml{SUVbw}]	0.648846	0.438436	0.509486	0.41123	0.428348	0.415406	0.408537	0.387743	0.405927	0.356394	0.34181	0.315031	0.31407	0.290997	0.264039	0.244815	0.247868	0.254966	0.281385
			575	l_thalamostriate_vein - [g/ml{SUVbw}]	0.171242	0.156089	0.187485	0.141066	0.149456	0.148782	0.145627	0.120341	0.138845	0.136827	0.0827703	0.0908357	0.0940906	0.108809	0.0831251	0.0787119	0.0875292	0.0845847	0.091963	0.103136	0.0913853	0.091719	0.0959843		89	l_superior_temporal_gyrus - [g/ml{SUVbw}]	0.471842	0.414021	0.401557	0.351341	0.363848	0.35863	0.344253	0.316889	0.316078	0.323173	0.294162	0.293206	0.287676	0.264705	0.250252	0.241026	0.251332	0.24819	0.256198
			559	l_thalamus - [g/ml{SUVbw}]	0.258624	0.104987	0.186428	0.2268	0.226532	0.18404	0.180691	0.148927	0.171725	0.125692	0.125341	0.13021	0.0973527	0.138332	0.110901	0.115819	0.101078	0.102609	0.124168	0.116206	0.103573	0.108583	0.133214		401	l_superior_vestibular_nucleus - [g/ml{SUVbw}]	0.584629	0.33262	0.409497	0.522253	0.428804	0.409522	0.42117	0.367812	0.432856	0.331025	0.300832	0.334166	0.252693	0.244833	0.232663	0.264478	0.215089	0.262514	0.207828
			207	l_third_ventricle - [g/ml{SUVbw}]	0.340354	0.15529	0.228284	0.246887	0.222654	0.2448	0.261326	0.169398	0.275376	0.148499	0.143941	0.169418	0.113053	0.151712	0.117923	0.118419	0.124824	0.103374	0.147745	0.144794	0.125778	0.12914	0.148182		77	l_supramarginal_gyrus - [g/ml{SUVbw}]	0.43387	0.31743	0.332683	0.303296	0.303776	0.274707	0.280327	0.250256	0.244042	0.243753	0.228381	0.210909	0.20382	0.177566	0.165358	0.15543	0.150913	0.15516	0.143917
			373	l_trapezoid_body - [g/ml{SUVbw}]	0.210561	0.236637	0.395925	0.315369	0.254578	0.251546	0.2707	0.266876	0.293133	0.199491	0.212937	0.216798	0.185359	0.145333	0.147096	0.15909	0.129347	0.161365	0.208608	0.172893	0.183417	0.207029	0.204021		291	l_supraoptic_nucleus - [g/ml{SUVbw}]	0.959565	0.671925	0.648687	0.724664	0.708488	0.625186	0.560424	0.595313	0.56566	0.512244	0.493029	0.47772	0.388861	0.442439	0.360417	0.342966	0.351783	0.347415	0.380236
			139	l_trigeminal_nerve - [g/ml{SUVbw}]	0.503386	0.236078	0.419455	0.414934	0.45747	0.362917	0.326512	0.270963	0.38119	0.280974	0.230104	0.200043	0.241145	0.205371	0.193463	0.17709	0.206638	0.236592	0.232811	0.222108	0.21294	0.227761	0.255572		39	l_supraspinal_nucleus - [g/ml{SUVbw}]	0.31982	0.527994	0.722418	0.727367	0.749942	0.837402	0.794573	0.695032	0.633708	0.682406	0.661062	0.599273	0.541991	0.569978	0.525714	0.421413	0.476383	0.485481	0.513676
			415	l_trigeminal_nerve_fibers - [g/ml{SUVbw}]	0.393045	0.253309	0.447785	0.405761	0.423647	0.348201	0.28349	0.289677	0.341065	0.252123	0.229061	0.194985	0.233919	0.203299	0.190254	0.186753	0.189268	0.214776	0.212194	0.205629	0.213315	0.222344	0.229788		1191	l_supraspinal_nucleus_wm - [g/ml{SUVbw}]	0.318261	0.574203	0.838199	0.793371	0.778958	0.894582	0.846428	0.749317	0.679621	0.753424	0.695084	0.653348	0.602418	0.61725	0.571436	0.47006	0.515167	0.533806	0.558986
			137	l_trochlear_nerve_fibers - [g/ml{SUVbw}]	0.403447	0.361843	0.234299	0.155374	0.351541	0.177656	0.223615	0.205411	0.206056	0.183125	0.13592	0.146066	0.177418	0.120084	0.113492	0.129524	0.111332	0.106336	0.129036	0.0992687	0.123037	0.123719	0.118062		61	l_tectospinal_tract_of_the_medulla - [g/ml{SUVbw}]	0.326767	0.486431	0.650033	0.68443	0.73628	0.814849	0.779366	0.673187	0.607212	0.653432	0.641744	0.560482	0.515673	0.543721	0.506845	0.405894	0.467203	0.466248	0.488491
			565	l_trochlear_nucleus - [g/ml{SUVbw}]	0.327705	0.319764	0.243636	0.217679	0.279761	0.182888	0.228301	0.149802	0.197953	0.180101	0.11644	0.134179	0.156161	0.0936676	0.110457	0.105334	0.105969	0.0995927	0.133911	0.0944898	0.118413	0.124761	0.0921127		161	l_telodiencephalic_fissure - [g/ml{SUVbw}]	0.437734	0.268693	0.281915	0.331887	0.347775	0.276514	0.270548	0.286254	0.246276	0.245027	0.221871	0.194589	0.18274	0.164286	0.158724	0.137857	0.128946	0.133247	0.131715
			351	l_tuber - [g/ml{SUVbw}]	0.484116	0.325664	0.361097	0.32997	0.317052	0.320324	0.278872	0.290184	0.361542	0.272477	0.290995	0.202392	0.215087	0.200732	0.160548	0.174458	0.198845	0.156049	0.165501	0.151586	0.180531	0.177211	0.210085		119	l_temporal_horn_of_the_lateral_ventricle - [g/ml{SUVbw}]	0.367833	0.355998	0.349067	0.391037	0.396823	0.374197	0.340331	0.32786	0.361641	0.313277	0.318125	0.292612	0.266669	0.265407	0.234153	0.240292	0.233694	0.232523	0.247056
			337	l_uvula - [g/ml{SUVbw}]	0.241895	0.233933	0.282174	0.244751	0.155838	0.228274	0.172743	0.17292	0.10756	0.130596	0.117071	0.12187	0.128846	0.121825	0.115137	0.0969688	0.105259	0.0861616	0.0935189	0.107075	0.112255	0.0935906	0.133471		235	l_temporal_white_matter - [g/ml{SUVbw}]	0.445065	0.446715	0.41883	0.41595	0.457877	0.438117	0.429357	0.397893	0.414485	0.400956	0.373178	0.357865	0.349066	0.328554	0.313711	0.308604	0.326694	0.322252	0.332819
			189	l_ventral_nucleus_of_the_medial_geniculate_body - [g/ml{SUVbw}]	0.261164	0.137989	0.102096	0.224682	0.266278	0.166262	0.182418	0.196844	0.163324	0.141453	0.160039	0.104668	0.0915915	0.12045	0.115442	0.105568	0.10583	0.113724	0.129425	0.113593	0.101226	0.0957264	0.111144		551	l_thalamostriate_vein - [g/ml{SUVbw}]	0.404472	0.18954	0.250025	0.253395	0.241763	0.235914	0.208763	0.245253	0.222219	0.215414	0.175087	0.178187	0.158272	0.134699	0.144072	0.120975	0.112179	0.110788	0.11585
			473	l_ventral_part_of_the_gigantocellular_nucleus - [g/ml{SUVbw}]	0.11275	0.165255	0.348075	0.249581	0.233856	0.225528	0.218882	0.178307	0.347026	0.239551	0.219967	0.150743	0.180956	0.163912	0.155311	0.127075	0.170575	0.194099	0.187216	0.17764	0.179223	0.218694	0.181391		539	l_thalamus - [g/ml{SUVbw}]	0.714203	0.333294	0.410106	0.333777	0.389304	0.349958	0.330699	0.310096	0.314161	0.280134	0.276747	0.257817	0.229904	0.196407	0.205499	0.17318	0.161436	0.160175	0.171278
			45	l_ventral_reticular_nucleus - [g/ml{SUVbw}]	0.380973	0.19422	0.55206	0.335019	0.359802	0.178518	0.202941	0.217313	0.163269	0.230408	0.174353	0.201245	0.172041	0.16645	0.16189	0.161729	0.204282	0.191387	0.210325	0.209545	0.221887	0.252711	0.208431		197	l_third_ventricle - [g/ml{SUVbw}]	0.505606	0.288881	0.32063	0.283077	0.370445	0.298553	0.307471	0.281932	0.27082	0.257789	0.2346	0.211439	0.196016	0.176087	0.173314	0.141075	0.134724	0.126876	0.139162
			403	l_ventral_spinocerebellar_tract - [g/ml{SUVbw}]	0.468204	0.325759	0.278791	0.218413	0.247094	0.289435	0.2224	0.300799	0.259159	0.18905	0.209544	0.17472	0.168739	0.170503	0.121251	0.13214	0.126445	0.117019	0.123544	0.111622	0.118875	0.115733	0.12411		217	l_transverse_pontine_fibers - [g/ml{SUVbw}]	0.568293	0.677388	0.713193	0.817215	0.69992	0.69952	0.728809	0.599893	0.537164	0.579856	0.64875	0.599353	0.55026	0.517381	0.508893	0.466602	0.46013	0.488451	0.541351
			379	l_ventral_tegmental_area - [g/ml{SUVbw}]	0.301782	0.253872	0.304978	0.230178	0.227313	0.22124	0.195287	0.190165	0.145541	0.140347	0.134556	0.160953	0.118883	0.136087	0.134011	0.130179	0.128329	0.118578	0.143052	0.109667	0.134801	0.136527	0.145298		363	l_trapezoid_body - [g/ml{SUVbw}]	0.864551	1.02478	0.881034	0.76846	0.844926	0.901178	0.838245	0.807556	0.772396	0.675177	0.652828	0.679112	0.60972	0.567482	0.519622	0.528321	0.488427	0.559111	0.555078
			399	l_vestibulocochlear_nerve - [g/ml{SUVbw}]	0.282152	0.3657	0.474963	0.425248	0.328357	0.299531	0.267529	0.31118	0.288239	0.217296	0.230827	0.220839	0.227044	0.173797	0.179038	0.193333	0.168771	0.200705	0.224057	0.193781	0.228197	0.240403	0.239491		135	l_trigeminal_nerve - [g/ml{SUVbw}]	0.992051	0.674337	0.597422	0.525928	0.538482	0.560137	0.621683	0.618869	0.464886	0.521788	0.43734	0.511482	0.431561	0.485085	0.421009	0.412475	0.41585	0.483125	0.467797
			405	l_vestibulocochlear_nerve_fibers - [g/ml{SUVbw}]	0.237265	0.318829	0.46079	0.369026	0.283816	0.264961	0.274875	0.305179	0.277341	0.198929	0.225141	0.232765	0.202316	0.152957	0.155666	0.177691	0.140033	0.167436	0.220927	0.172468	0.192131	0.219515	0.216166		405	l_trigeminal_nerve_fibers - [g/ml{SUVbw}]	1.04276	0.682753	0.565545	0.498642	0.532968	0.594104	0.563587	0.61308	0.454068	0.498103	0.417708	0.472448	0.409773	0.458114	0.393646	0.402596	0.394084	0.466919	0.461198
			687	r_abducens_nucleus - [g/ml{SUVbw}]	0.174212	0.796573	0.159105	0.204143	0.117457	0.140309	0.209258	0.241289	0.166893	0.160735	0.134565	0.122137	0.0625613	0.159685	0.103185	0.102996	0.0996332	0.0992597	0.0958312	0.0994292	0.0998896	0.13711	0.0784503		133	l_trochlear_nerve_fibers - [g/ml{SUVbw}]	0.637675	0.410467	0.368897	0.378455	0.366508	0.349953	0.384494	0.359145	0.300685	0.346826	0.290022	0.289766	0.271782	0.19709	0.223399	0.197635	0.179931	0.194964	0.19644
			873	r_accessory_basal_nucleus_of_the_amygdala - [g/ml{SUVbw}]	0.935539	0.948235	0.468852	0.663093	0.42	0.454434	0.528403	0.381756	0.466487	0.34433	0.386077	0.309816	0.366231	0.335335	0.300773	0.298459	0.318708	0.309203	0.33847	0.379625	0.369684	0.344707	0.397494		543	l_trochlear_nucleus - [g/ml{SUVbw}]	0.594828	0.378025	0.350961	0.334344	0.357711	0.344161	0.368196	0.334166	0.278822	0.332073	0.279941	0.247783	0.253431	0.189456	0.201884	0.190645	0.173187	0.188407	0.184679
			631	r_accessory_cuneate_nucleus - [g/ml{SUVbw}]	0.190802	0.22875	0.28349	0.260662	0.173215	0.248581	0.180245	0.193447	0.12906	0.167242	0.0932109	0.134353	0.10138	0.0723806	0.108552	0.122928	0.104525	0.13162	0.108907	0.122425	0.135242	0.121325	0.147076		341	l_tuber - [g/ml{SUVbw}]	0.474656	0.358893	0.328895	0.261356	0.301852	0.285492	0.307848	0.299271	0.231817	0.224671	0.233314	0.214572	0.201283	0.206098	0.171735	0.162244	0.166089	0.160961	0.172545
			949	r_alar_central_lobule - [g/ml{SUVbw}]	0.324247	0.501615	0.2536	0.401052	0.302758	0.269912	0.261266	0.245913	0.197531	0.314795	0.200963	0.163577	0.1354	0.192874	0.15773	0.12752	0.134571	0.14585	0.140423	0.151108	0.117001	0.141879	0.147853		327	l_uvula - [g/ml{SUVbw}]	0.52001	0.719447	0.784839	0.62405	0.531603	0.6637	0.593405	0.546652	0.494988	0.464301	0.515623	0.42011	0.438811	0.399118	0.342718	0.338827	0.345514	0.332744	0.343219
			733	r_alveus - [g/ml{SUVbw}]	0.407585	0.341442	0.247495	0.277342	0.246986	0.257106	0.248176	0.232741	0.237495	0.181277	0.203639	0.162262	0.163952	0.148152	0.142169	0.136987	0.137354	0.135878	0.151377	0.15434	0.169037	0.149386	0.178703		183	l_ventral_nucleus_of_the_medial_geniculate_body - [g/ml{SUVbw}]	0.647384	0.511504	0.300078	0.344999	0.31659	0.405105	0.323118	0.337128	0.313456	0.299532	0.239572	0.230632	0.249559	0.208903	0.196297	0.183162	0.142171	0.155355	0.166133
			1163	r_amygdala_-_not_otherwise_specified - [g/ml{SUVbw}]	0.892094	0.65135	0.468258	0.395383	0.266731	0.361012	0.329975	0.321675	0.36357	0.289983	0.354364	0.25351	0.297191	0.261696	0.305214	0.292013	0.273453	0.294872	0.323308	0.369823	0.36355	0.392432	0.42303		45	l_ventral_reticular_nucleus - [g/ml{SUVbw}]	0.37477	0.586841	0.755562	0.743787	0.806574	0.85869	0.835268	0.712486	0.670827	0.700663	0.667766	0.626747	0.556477	0.579239	0.525702	0.421655	0.474403	0.481469	0.510373
			1121	r_amygdalohippocampal_area - [g/ml{SUVbw}]	0.402514	0.59274	0.52126	0.506499	0.405579	0.326072	0.430486	0.299941	0.411971	0.348896	0.279836	0.238263	0.277081	0.261116	0.19697	0.230328	0.226695	0.236831	0.253162	0.266389	0.285429	0.231661	0.295813		1197	l_ventral_reticular_nucleus_wm - [g/ml{SUVbw}]	0.419584	0.644238	0.786219	0.773095	0.861603	0.89527	0.870981	0.744257	0.70966	0.724749	0.683495	0.653785	0.576014	0.59843	0.540483	0.436489	0.481442	0.49454	0.518201
			1141	r_amygdalopiriform_transition_area - [g/ml{SUVbw}]	0.721579	0.692792	0.391484	0.463888	0.284125	0.356598	0.37484	0.359291	0.392142	0.349568	0.371824	0.295322	0.333917	0.319076	0.348288	0.327755	0.310231	0.343758	0.37688	0.402286	0.422239	0.432944	0.434925		395	l_ventral_spinocerebellar_tract - [g/ml{SUVbw}]	0.649457	0.352323	0.413034	0.482664	0.392904	0.377965	0.37963	0.397692	0.368823	0.338078	0.291852	0.354152	0.240988	0.234033	0.226395	0.244957	0.194824	0.216565	0.198349
			601	r_angular_gyrus - [g/ml{SUVbw}]	0.220863	0.232151	0.253696	0.248989	0.211166	0.162274	0.200662	0.191809	0.195502	0.19574	0.152954	0.173031	0.144223	0.15351	0.142772	0.149771	0.189718	0.169358	0.166231	0.186365	0.184598	0.194372	0.198741		369	l_ventral_tegmental_area - [g/ml{SUVbw}]	1.4179	0.805434	0.907234	0.875664	0.91121	0.75445	0.749584	0.734349	0.697212	0.625993	0.635951	0.657741	0.609062	0.544866	0.499092	0.427967	0.438094	0.46156	0.458279
			597	r_annectant_gyrus_macaque - [g/ml{SUVbw}]	0.328312	0.240515	0.280152	0.336659	0.222506	0.258886	0.247396	0.193554	0.261035	0.240321	0.173881	0.185266	0.150193	0.153466	0.143419	0.148869	0.171851	0.170593	0.163541	0.160275	0.16503	0.173224	0.182007		391	l_vestibulocochlear_nerve - [g/ml{SUVbw}]	1.04606	0.942451	0.726835	0.645716	0.738259	0.77556	0.707441	0.749781	0.614571	0.675994	0.597609	0.60785	0.564716	0.600994	0.541378	0.553124	0.539736	0.648217	0.703049
			979	r_ansa_lenticularis - [g/ml{SUVbw}]	0.415179	0.51876	0.249225	0.521262	0.296552	0.342067	0.310533	0.213848	0.384015	0.264543	0.190639	0.160443	0.2021	0.145288	0.140269	0.143003	0.152751	0.179013	0.167759	0.184166	0.142477	0.154496	0.163551		397	l_vestibulocochlear_nerve_fibers - [g/ml{SUVbw}]	0.925558	1.11481	0.793036	0.700451	0.910078	0.950676	0.787148	0.83651	0.773081	0.761879	0.633259	0.639072	0.612792	0.604531	0.556887	0.579095	0.558539	0.622639	0.638064
			1143	r_anterior_amygdalar_area - [g/ml{SUVbw}]	0.949122	0.572097	0.36039	0.373111	0.222886	0.348428	0.265211	0.26691	0.309021	0.259941	0.289745	0.2016	0.238981	0.209692	0.228621	0.213432	0.214829	0.224131	0.238719	0.303938	0.26265	0.298007	0.362647		665	r_abducens_nucleus - [g/ml{SUVbw}]	0.573431	0.336264	0.392989	0.386899	0.403583	0.401679	0.343437	0.38359	0.365382	0.31075	0.292243	0.326091	0.281934	0.266874	0.247653	0.234218	0.205482	0.224291	0.220515
			863	r_anterior_cingulate_gyrus - [g/ml{SUVbw}]	0.327347	0.329002	0.34068	0.268845	0.230784	0.263394	0.254726	0.209267	0.199756	0.20612	0.163255	0.183214	0.173834	0.162287	0.149193	0.142432	0.158432	0.153749	0.172039	0.185518	0.183566	0.213772	0.18143		833	r_accessory_basal_nucleus_of_the_amygdala - [g/ml{SUVbw}]	0.816954	1.20134	1.05336	1.01309	0.913279	0.898147	0.83473	0.90817	0.805677	0.812515	0.756152	0.741673	0.713819	0.642289	0.582525	0.550503	0.5649	0.527731	0.542382
			889	r_anterior_commissure - [g/ml{SUVbw}]	0.690679	0.164143	0.266009	0.188628	0.353884	0.236949	0.227315	0.219859	0.208222	0.206062	0.185714	0.108477	0.127395	0.141468	0.118202	0.121782	0.0962182	0.125498	0.135544	0.112846	0.106229	0.114693	0.105367		611	r_accessory_cuneate_nucleus - [g/ml{SUVbw}]	0.463156	0.530221	0.562739	0.460509	0.6201	0.458741	0.518881	0.524095	0.50917	0.421685	0.49307	0.363841	0.383648	0.373292	0.356289	0.302301	0.328447	0.330658	0.313385
			635	r_anterior_corticospinal_tract_of_the_medulla - [g/ml{SUVbw}]	0.803574	0.517953	0.629219	0.582631	0.54509	0.410885	0.446933	0.401587	0.282758	0.327402	0.271463	0.321137	0.333223	0.255742	0.272589	0.281955	0.305943	0.294193	0.326656	0.277324	0.307301	0.300827	0.337072		913	r_alar_central_lobule - [g/ml{SUVbw}]	0.552749	0.286771	0.325358	0.325838	0.316196	0.329582	0.280847	0.30843	0.292311	0.204802	0.209482	0.185818	0.194606	0.165285	0.145954	0.137333	0.124465	0.121304	0.120358
			893	r_anterior_part_of_the_anterior_commissure - [g/ml{SUVbw}]	0.490979	0.304801	0.266633	0.228261	0.513555	0.255427	0.117212	0.236551	0.197987	0.197517	0.130917	0.163122	0.132967	0.166273	0.144782	0.145098	0.128374	0.162157	0.141766	0.162135	0.134927	0.152802	0.126544		707	r_alveus - [g/ml{SUVbw}]	0.527359	0.506663	0.534066	0.521551	0.475877	0.463948	0.454894	0.457314	0.433657	0.43786	0.396095	0.38878	0.366261	0.337505	0.307162	0.288474	0.287075	0.295571	0.305112
			947	r_anterior_quadrangular_lobule - [g/ml{SUVbw}]	0.327386	0.226567	0.201448	0.187142	0.18142	0.211059	0.214051	0.172026	0.15439	0.230951	0.174254	0.139447	0.156226	0.126587	0.132516	0.127788	0.124706	0.133586	0.139905	0.144281	0.136758	0.12441	0.123704		1121	r_amygdala_-_not_otherwise_specified - [g/ml{SUVbw}]	0.938358	0.850585	0.82566	0.65314	0.677609	0.638222	0.686183	0.636932	0.615342	0.582833	0.503081	0.528602	0.530605	0.475309	0.43311	0.397618	0.405162	0.409637	0.44297
			859	r_anterodorsal_nucleus_of_the_thalamus - [g/ml{SUVbw}]	0.426559	0.0987332	0.346733	0.198798	0.228787	0.278766	0.341776	0.19502	0.249255	0.213149	0.143366	0.155924	0.112054	0.145389	0.114758	0.121447	0.11829	0.103139	0.148947	0.147495	0.126613	0.143998	0.169661		1079	r_amygdalohippocampal_area - [g/ml{SUVbw}]	1.07987	0.955682	0.943614	1.12961	0.796743	0.862914	0.809195	0.869705	0.795693	0.821954	0.722697	0.719292	0.648841	0.546407	0.531064	0.510105	0.531413	0.512176	0.510667
			857	r_anteromedial_nucleus_of_the_thalamus - [g/ml{SUVbw}]	0.327596	0.0668543	0.262568	0.228651	0.230452	0.235088	0.292916	0.18872	0.218722	0.175635	0.142659	0.135831	0.103908	0.165167	0.11852	0.127482	0.10195	0.105026	0.141994	0.131769	0.10861	0.127549	0.163431		1099	r_amygdalopiriform_transition_area - [g/ml{SUVbw}]	0.684364	0.946405	0.871979	0.693422	0.727685	0.712648	0.767437	0.695433	0.729583	0.661464	0.602558	0.581276	0.60305	0.535783	0.502225	0.475042	0.476906	0.491027	0.519599
			1039	r_anteroventral_cochlear_nucleus - [g/ml{SUVbw}]	0.606648	0.320792	0.398117	0.363171	0.340792	0.307976	0.381791	0.293239	0.26583	0.321581	0.251096	0.184529	0.194556	0.170206	0.150859	0.16482	0.149333	0.192257	0.163204	0.180528	0.178542	0.172072	0.196363		581	r_angular_gyrus - [g/ml{SUVbw}]	0.470573	0.303378	0.329295	0.274706	0.274199	0.273233	0.265856	0.253914	0.224952	0.23075	0.220024	0.208575	0.182567	0.169706	0.143059	0.13399	0.125609	0.12857	0.117783
			839	r_anteroventral_nucleus_of_the_thalamus - [g/ml{SUVbw}]	0.475453	0.114908	0.360811	0.242035	0.257255	0.319945	0.33353	0.192545	0.241444	0.224031	0.159613	0.157984	0.115151	0.148103	0.123154	0.130353	0.11656	0.111784	0.152346	0.143205	0.130192	0.144426	0.167999		577	r_annectant_gyrus_macaque - [g/ml{SUVbw}]	0.663414	0.452188	0.487201	0.385368	0.391696	0.378488	0.370413	0.346276	0.311876	0.297863	0.293589	0.279298	0.244125	0.214851	0.198687	0.185318	0.181183	0.173054	0.172751
			997	r_area_postrema - [g/ml{SUVbw}]	0.166458	0.211433	0.274628	0.269966	0.151123	0.223969	0.189116	0.192345	0.112242	0.182107	0.0841902	0.133305	0.100148	0.0673687	0.114384	0.119203	0.111721	0.127373	0.102825	0.112852	0.141672	0.124093	0.138591		1101	r_anterior_amygdalar_area - [g/ml{SUVbw}]	1.08673	0.822896	0.795209	0.683791	0.600251	0.65203	0.634317	0.628297	0.55964	0.557378	0.479091	0.53194	0.499033	0.451521	0.410345	0.373181	0.383435	0.372531	0.403372
			1139	r_basal_forebrain_nucleus - [g/ml{SUVbw}]	0.56696	0.5016	0.224477	0.457176	0.289918	0.325744	0.235776	0.221896	0.329505	0.238394	0.206531	0.193092	0.175935	0.163006	0.156375	0.159885	0.168593	0.196873	0.172523	0.222052	0.171155	0.187459	0.204141		823	r_anterior_cingulate_gyrus - [g/ml{SUVbw}]	0.590584	0.354359	0.379008	0.345617	0.375519	0.331602	0.302479	0.311368	0.303873	0.277467	0.270219	0.257234	0.2429	0.204528	0.188415	0.16697	0.164277	0.160354	0.167618
			875	r_basal_nucleus_of_the_amygdala - [g/ml{SUVbw}]	0.884826	0.774282	0.465133	0.528367	0.383735	0.474785	0.463676	0.389945	0.419807	0.331939	0.390432	0.318253	0.320412	0.290026	0.298076	0.27394	0.292136	0.280277	0.316286	0.334839	0.350525	0.348522	0.410152		853	r_anterior_commissure - [g/ml{SUVbw}]	0.775758	0.497338	0.518358	0.279996	0.631752	0.427642	0.422593	0.350425	0.391112	0.347566	0.365745	0.32656	0.358564	0.258241	0.28099	0.240778	0.22175	0.239244	0.260355
			955	r_biventer_lobule - [g/ml{SUVbw}]	0.488904	0.215225	0.30103	0.272151	0.283411	0.217253	0.18649	0.236051	0.149944	0.16391	0.174775	0.156579	0.127483	0.133614	0.129418	0.129001	0.112144	0.138962	0.149653	0.150244	0.139806	0.137735	0.139212		857	r_anterior_part_of_the_anterior_commissure - [g/ml{SUVbw}]	0.909174	0.456015	0.447057	0.525979	0.416152	0.450593	0.500146	0.367233	0.39792	0.358255	0.382457	0.368124	0.339391	0.346681	0.302625	0.306354	0.32156	0.327442	0.342585
			791	r_body_of_the_corpus_callosum - [g/ml{SUVbw}]	0.523335	0.213817	0.321815	0.215496	0.199864	0.208867	0.200917	0.194757	0.171277	0.196981	0.131474	0.135682	0.144637	0.134957	0.123058	0.102869	0.0898535	0.0969644	0.101596	0.109407	0.110746	0.119964	0.10624		1051	r_anterior_pretectal_nucleus - [g/ml{SUVbw}]	0.546069	0.27039	0.346373	0.163195	0.351267	0.281613	0.272084	0.284739	0.226077	0.2169	0.175832	0.157495	0.152389	0.167444	0.152295	0.128711	0.102303	0.11321	0.114879
			847	r_body_of_the_fornix - [g/ml{SUVbw}]	0.386096	0.0828919	0.314386	0.191206	0.213414	0.237772	0.29225	0.190995	0.220836	0.222985	0.140745	0.132451	0.109222	0.152401	0.12348	0.112061	0.0961201	0.093057	0.124263	0.127764	0.115179	0.134202	0.138243		911	r_anterior_quadrangular_lobule - [g/ml{SUVbw}]	0.651381	0.309702	0.420268	0.339941	0.324817	0.338021	0.300251	0.319331	0.306201	0.266913	0.234371	0.225719	0.214413	0.179664	0.15949	0.155446	0.139154	0.14028	0.129301
			707	r_body_of_the_lateral_ventricle - [g/ml{SUVbw}]	0.381862	0.228165	0.249252	0.205617	0.219766	0.219861	0.221927	0.21343	0.242206	0.175604	0.172687	0.156611	0.132948	0.123387	0.128793	0.12678	0.139946	0.123921	0.13622	0.149098	0.127031	0.136062	0.150077		819	r_anterodorsal_nucleus_of_the_thalamus - [g/ml{SUVbw}]	0.550343	0.32977	0.317373	0.304552	0.384875	0.27724	0.307016	0.274666	0.369665	0.278356	0.241694	0.239442	0.220851	0.182219	0.179468	0.149361	0.135903	0.118465	0.13874
			755	r_brachium_of_the_superior_colliculus - [g/ml{SUVbw}]	0.246056	0.145243	0.19201	0.238865	0.245978	0.188676	0.30938	0.170529	0.177757	0.142272	0.174639	0.131643	0.119766	0.127518	0.104907	0.0970004	0.115931	0.120267	0.0993243	0.120733	0.0997505	0.0924652	0.120687		817	r_anteromedial_nucleus_of_the_thalamus - [g/ml{SUVbw}]	0.556891	0.331303	0.321611	0.273328	0.369511	0.292804	0.306631	0.274669	0.364152	0.26838	0.245474	0.228191	0.217745	0.169749	0.176034	0.142609	0.135168	0.118226	0.138678
			1123	r_CA1_field - [g/ml{SUVbw}]	0.494505	0.603795	0.58448	0.510266	0.519514	0.366275	0.479498	0.354435	0.423976	0.367058	0.345196	0.280371	0.306325	0.32096	0.237258	0.263976	0.267162	0.283318	0.302132	0.295433	0.324526	0.277862	0.327909		993	r_anteroventral_cochlear_nucleus - [g/ml{SUVbw}]	0.872875	1.1186	0.903317	0.90912	0.728402	0.880349	0.805154	0.692929	0.747353	0.613715	0.641249	0.601729	0.582745	0.501479	0.499378	0.451353	0.423995	0.464288	0.454275
			1155	r_callosal_sulcus - [g/ml{SUVbw}]	0.235222	0.325014	0.378434	0.193932	0.333622	0.325942	0.195002	0.220443	0.163713	0.146136	0.135094	0.180454	0.162709	0.130179	0.124588	0.122923	0.150881	0.11828	0.134794	0.156946	0.170523	0.122444	0.146489		803	r_anteroventral_nucleus_of_the_thalamus - [g/ml{SUVbw}]	0.519848	0.366953	0.338844	0.314161	0.383149	0.280328	0.296563	0.298971	0.414233	0.283067	0.25606	0.242774	0.226894	0.190911	0.177285	0.153665	0.143977	0.128037	0.137163
			775	r_capsule_of_the_medial_geniculate_body - [g/ml{SUVbw}]	0.255687	0.141764	0.201813	0.230945	0.231225	0.178024	0.303649	0.158709	0.152657	0.134799	0.16319	0.12276	0.114687	0.112895	0.0962466	0.0914658	0.107364	0.113392	0.0925507	0.113799	0.0971248	0.0868771	0.113709		1097	r_basal_forebrain_nucleus - [g/ml{SUVbw}]	1.03935	0.78713	0.770781	0.700021	0.600175	0.696413	0.657065	0.565188	0.567432	0.57492	0.550516	0.58488	0.541016	0.48017	0.445706	0.424787	0.415299	0.421682	0.434435
			611	r_caudal_part_of_the_spinal_trigeminal_nucleus - [g/ml{SUVbw}]	0.485455	0.414871	0.40616	0.291422	0.392289	0.324424	0.229481	0.353227	0.261982	0.234742	0.253842	0.220948	0.233344	0.175329	0.194578	0.248896	0.214427	0.226419	0.255475	0.225396	0.256067	0.238286	0.291471		835	r_basal_nucleus_of_the_amygdala - [g/ml{SUVbw}]	0.610784	0.859645	0.864906	0.746621	0.780695	0.741393	0.698525	0.735124	0.668041	0.65418	0.618595	0.597245	0.603852	0.555949	0.489979	0.462292	0.466792	0.452003	0.483881
			1079	r_caudal_pontine_reticular_nucleus - [g/ml{SUVbw}]	0.367169	0.385238	0.30647	0.286198	0.176709	0.257974	0.232513	0.221378	0.205605	0.306015	0.163339	0.136554	0.124633	0.167654	0.132479	0.116885	0.128313	0.145141	0.108954	0.135889	0.104854	0.144102	0.145294		919	r_biventer_lobule - [g/ml{SUVbw}]	0.847985	0.746195	0.684591	0.64683	0.692074	0.673129	0.597573	0.564239	0.582112	0.54512	0.558661	0.505628	0.418194	0.426664	0.381277	0.342792	0.340025	0.351645	0.34248
			721	r_caudate_nucleus - [g/ml{SUVbw}]	0.728357	0.27298	0.29776	0.228136	0.317127	0.22331	0.171363	0.20711	0.230376	0.20224	0.159432	0.124812	0.113658	0.144486	0.13267	0.109992	0.0976251	0.118663	0.11633	0.124467	0.135441	0.118607	0.121679		757	r_body_of_the_corpus_callosum - [g/ml{SUVbw}]	0.657206	0.402169	0.440615	0.397131	0.394272	0.324204	0.327723	0.368417	0.369294	0.316357	0.288983	0.254047	0.252716	0.229794	0.199669	0.170239	0.167199	0.148712	0.150722
			1133	r_central_amygdalar_nucleus - [g/ml{SUVbw}]	0.496022	0.639509	0.261783	0.293688	0.16756	0.314358	0.203157	0.2105	0.306616	0.240954	0.196815	0.147074	0.148184	0.154343	0.136854	0.139753	0.159509	0.137846	0.146122	0.176251	0.17505	0.156587	0.210255		809	r_body_of_the_fornix - [g/ml{SUVbw}]	0.520183	0.307332	0.335631	0.300077	0.386611	0.300945	0.314184	0.277843	0.335526	0.277966	0.250612	0.234227	0.237644	0.189383	0.188789	0.152779	0.142508	0.128343	0.151359
			619	r_central_gray_of_the_medulla - [g/ml{SUVbw}]	0.456783	0.262642	0.482259	0.387575	0.307011	0.243561	0.234565	0.251498	0.19905	0.20215	0.176315	0.18083	0.189988	0.159793	0.16094	0.17921	0.179903	0.17378	0.19527	0.181059	0.207412	0.190246	0.229244		683	r_body_of_the_lateral_ventricle - [g/ml{SUVbw}]	0.584537	0.387836	0.468404	0.367054	0.365772	0.396594	0.324067	0.354131	0.29436	0.315978	0.286332	0.247286	0.264499	0.2122	0.194235	0.162889	0.163238	0.155216	0.144912
			769	r_central_gray_of_the_midbrain - [g/ml{SUVbw}]	0.662683	0.283421	0.377016	0.289787	0.298352	0.333302	0.319364	0.194534	0.259271	0.249164	0.188562	0.198863	0.165326	0.135601	0.130658	0.135163	0.146264	0.134909	0.160627	0.130752	0.12537	0.141964	0.116147		729	r_brachium_of_the_superior_colliculus - [g/ml{SUVbw}]	0.612367	0.288476	0.413449	0.23001	0.356911	0.302822	0.279071	0.292914	0.26174	0.266103	0.205288	0.199231	0.197806	0.20135	0.163509	0.155105	0.123419	0.142464	0.130319
			1069	r_central_gray_of_the_pons - [g/ml{SUVbw}]	0.245974	0.773094	0.214632	0.334738	0.136633	0.196062	0.230531	0.252387	0.172973	0.210638	0.153937	0.133916	0.0879935	0.182773	0.118628	0.110071	0.114948	0.115085	0.111535	0.10403	0.100362	0.145404	0.0989822		1081	r_CA1_field - [g/ml{SUVbw}]	0.995816	1.14813	1.02774	1.20102	0.891239	0.949801	0.901504	0.968281	0.93764	0.907411	0.827314	0.778952	0.737232	0.632509	0.598227	0.577442	0.592253	0.576115	0.578266
			1015	r_central_lateral_nucleus - [g/ml{SUVbw}]	0.726637	0.219707	0.499488	0.195393	0.554653	0.297079	0.382633	0.286561	0.330932	0.249381	0.159423	0.316718	0.139618	0.126835	0.142423	0.1449	0.169259	0.160976	0.213333	0.171189	0.163693	0.187187	0.256202		1113	r_callosal_sulcus - [g/ml{SUVbw}]	0.721884	0.446592	0.419726	0.391117	0.438041	0.365396	0.429645	0.354634	0.387087	0.376697	0.339064	0.325862	0.30453	0.218538	0.240333	0.206208	0.197966	0.176686	0.193976
			1169	r_central_nucleus_of_the_inferior_colliculus - [g/ml{SUVbw}]	0.502126	0.269519	0.433102	0.386118	0.35578	0.302811	0.323151	0.243348	0.235713	0.380076	0.219015	0.196683	0.169362	0.164009	0.148814	0.156567	0.153504	0.178906	0.169034	0.13153	0.111811	0.152308	0.137103		745	r_capsule_of_the_medial_geniculate_body - [g/ml{SUVbw}]	0.56491	0.340207	0.428	0.267863	0.320767	0.328439	0.275353	0.280035	0.30357	0.255788	0.21156	0.212211	0.223172	0.231791	0.172683	0.181679	0.138144	0.174966	0.139686
			1021	r_central_tegmental_tract - [g/ml{SUVbw}]	0.334767	0.675323	0.29894	0.302809	0.194697	0.217686	0.266452	0.23963	0.214099	0.179836	0.177856	0.130202	0.107998	0.181642	0.132907	0.128692	0.127569	0.146634	0.127777	0.127275	0.14281	0.184089	0.124103		591	r_caudal_part_of_the_spinal_trigeminal_nucleus - [g/ml{SUVbw}]	0.322649	0.586799	0.578606	0.582923	0.699262	0.612961	0.595819	0.646122	0.638012	0.587226	0.547189	0.490784	0.506729	0.453255	0.460247	0.38776	0.426759	0.435865	0.445291
			1013	r_centromedian_nucleus - [g/ml{SUVbw}]	0.836072	0.248096	0.5253	0.320224	0.514558	0.196872	0.343082	0.172871	0.273981	0.253722	0.125301	0.181714	0.221713	0.182498	0.0992718	0.151978	0.13312	0.127282	0.145499	0.114264	0.137195	0.156407	0.139671		1033	r_caudal_pontine_reticular_nucleus - [g/ml{SUVbw}]	0.717817	0.460393	0.342343	0.386109	0.388407	0.381245	0.325403	0.330794	0.295271	0.265617	0.260111	0.238459	0.260645	0.24442	0.192525	0.189086	0.17047	0.173839	0.180948
			951	r_cerebellar_tonsil - [g/ml{SUVbw}]	0.20502	0.126339	0.239643	0.143952	0.215404	0.117074	0.160815	0.177828	0.187628	0.162594	0.159396	0.150711	0.131881	0.115977	0.109088	0.137191	0.135929	0.111151	0.158521	0.112998	0.122294	0.133432	0.122272		697	r_caudate_nucleus - [g/ml{SUVbw}]	0.516655	0.289929	0.338456	0.329235	0.337355	0.293355	0.308948	0.275306	0.267219	0.255312	0.25611	0.216777	0.205987	0.202399	0.184748	0.165358	0.159082	0.157123	0.165475
			937	r_cerebellar_white_matter - [g/ml{SUVbw}]	0.467246	0.3112	0.259218	0.243832	0.238606	0.233546	0.206032	0.219477	0.175549	0.186652	0.181651	0.163351	0.147355	0.136225	0.134638	0.127025	0.118417	0.12549	0.131563	0.137216	0.127645	0.120374	0.136017		1091	r_central_amygdalar_nucleus - [g/ml{SUVbw}]	0.98156	0.601294	0.634546	0.573307	0.404656	0.549392	0.462685	0.48662	0.419103	0.455618	0.400263	0.42535	0.386652	0.324023	0.316269	0.288723	0.278874	0.267077	0.288227
			995	r_cerebellomedullary_cistern - [g/ml{SUVbw}]	0.313315	0.295817	0.278212	0.320221	0.245943	0.304768	0.197399	0.182761	0.149937	0.160413	0.118235	0.131301	0.0912398	0.0712034	0.110455	0.115149	0.0894216	0.117315	0.122222	0.139891	0.114205	0.130237	0.123231		599	r_central_gray_of_the_medulla - [g/ml{SUVbw}]	0.44992	0.596845	0.734888	0.679961	0.895927	0.756588	0.788815	0.692933	0.697916	0.653684	0.676294	0.550078	0.535836	0.546561	0.522377	0.416052	0.448056	0.455601	0.503594
			767	r_cerebral_aqueduct - [g/ml{SUVbw}]	0.513654	0.302412	0.304755	0.267865	0.264589	0.315127	0.296549	0.175143	0.252868	0.206636	0.167344	0.179597	0.161454	0.11945	0.123633	0.124922	0.132808	0.115189	0.157379	0.114713	0.127004	0.134926	0.101239		739	r_central_gray_of_the_midbrain - [g/ml{SUVbw}]	0.524938	0.279212	0.310815	0.246296	0.326948	0.296933	0.298859	0.289622	0.236766	0.250809	0.217469	0.180953	0.182333	0.1657	0.157394	0.149587	0.126209	0.13333	0.128953
			679	r_cerebral_white_matter - [g/ml{SUVbw}]	0.25885	0.260928	0.28557	0.247744	0.222142	0.235164	0.224056	0.224207	0.220923	0.188145	0.185458	0.177056	0.157848	0.16084	0.156905	0.165026	0.160863	0.165117	0.181715	0.18156	0.183026	0.187968	0.192605		1023	r_central_gray_of_the_pons - [g/ml{SUVbw}]	0.516829	0.315567	0.338055	0.323323	0.337009	0.345819	0.299671	0.31541	0.303904	0.256272	0.239774	0.251521	0.234251	0.222434	0.199162	0.191967	0.16642	0.176716	0.176028
			891	r_claustral_amygdalar_area - [g/ml{SUVbw}]	0.514547	0.486539	0.598298	0.288159	0.299423	0.380449	0.244043	0.241969	0.306254	0.296454	0.293615	0.214148	0.213448	0.205225	0.197418	0.214737	0.243472	0.21983	0.269678	0.269852	0.270865	0.338069	0.333937		973	r_central_lateral_nucleus - [g/ml{SUVbw}]	0.540338	0.458115	0.433409	0.370004	0.371341	0.340231	0.307199	0.433783	0.399731	0.326127	0.311786	0.24155	0.217515	0.227236	0.192663	0.16097	0.168141	0.151254	0.137193
			823	r_claustrum - [g/ml{SUVbw}]	0.342442	0.312642	0.333331	0.216753	0.236446	0.220409	0.201673	0.193811	0.207874	0.22876	0.194198	0.148031	0.146818	0.165631	0.147068	0.154819	0.174255	0.169161	0.197062	0.202865	0.193967	0.241976	0.212405		1127	r_central_nucleus_of_the_inferior_colliculus - [g/ml{SUVbw}]	0.499834	0.23589	0.314911	0.260741	0.271716	0.316062	0.269034	0.259836	0.224213	0.225951	0.200216	0.170656	0.175899	0.154243	0.13998	0.136607	0.117031	0.114004	0.110533
			1043	r_cochlear_nerve - [g/ml{SUVbw}]	0.59716	0.273421	0.415556	0.363104	0.401401	0.311375	0.302565	0.256274	0.260507	0.243753	0.203194	0.157508	0.137185	0.130411	0.140155	0.150902	0.118163	0.156969	0.154659	0.174077	0.15024	0.157438	0.157506		979	r_central_tegmental_tract - [g/ml{SUVbw}]	0.406021	0.475209	0.495167	0.533081	0.603358	0.576361	0.536879	0.561893	0.531328	0.534946	0.486369	0.430742	0.403899	0.41272	0.391455	0.346632	0.317985	0.345275	0.357974
			729	r_commissure_of_the_fornix - [g/ml{SUVbw}]	0.514869	0.373987	0.285607	0.221257	0.285472	0.296574	0.312412	0.260148	0.302076	0.231452	0.222344	0.185249	0.170551	0.164942	0.157497	0.167957	0.185771	0.165764	0.149397	0.222089	0.1478	0.168806	0.166842		915	r_cerebellar_tonsil - [g/ml{SUVbw}]	0.477759	0.448454	0.471945	0.395643	0.430561	0.413152	0.39305	0.445895	0.393779	0.367145	0.384137	0.329609	0.273774	0.298542	0.26208	0.245266	0.26369	0.279272	0.310381
			705	r_commissure_of_the_inferior_colliculus - [g/ml{SUVbw}]	0.501225	0.333938	0.547961	0.319508	0.436188	0.338051	0.331136	0.233936	0.258723	0.37778	0.213147	0.214485	0.18471	0.156581	0.164258	0.180234	0.167325	0.173049	0.191334	0.13995	0.13167	0.150371	0.144251		901	r_cerebellar_white_matter - [g/ml{SUVbw}]	0.647407	0.457482	0.445928	0.424866	0.421855	0.419806	0.398393	0.368069	0.37381	0.3333	0.326911	0.310194	0.26933	0.26016	0.229288	0.213272	0.20905	0.217791	0.218082
			737	r_commissure_of_the_superior_colliculus - [g/ml{SUVbw}]	0.64428	0.414208	0.365946	0.266164	0.373889	0.442387	0.387032	0.198377	0.313858	0.239796	0.227529	0.24129	0.166598	0.152195	0.149936	0.167218	0.178367	0.131869	0.213954	0.170451	0.161212	0.161549	0.14339		959	r_cerebellomedullary_cistern - [g/ml{SUVbw}]	0.530108	0.441376	0.427678	0.41524	0.478543	0.385844	0.418009	0.404411	0.375283	0.311732	0.341015	0.290447	0.282461	0.275065	0.249839	0.221065	0.229663	0.235775	0.230452
			1161	r_crus_cerebri - [g/ml{SUVbw}]	0.358729	0.231918	0.469203	0.32757	0.382396	0.23477	0.25931	0.262467	0.243996	0.325557	0.19267	0.182279	0.188099	0.185055	0.140407	0.175432	0.158781	0.185677	0.186754	0.183208	0.215623	0.189802	0.240844		737	r_cerebral_aqueduct - [g/ml{SUVbw}]	0.491391	0.291642	0.304903	0.255405	0.333738	0.292066	0.312621	0.301992	0.21887	0.254137	0.217473	0.179041	0.181121	0.158775	0.157968	0.149735	0.126631	0.136618	0.133373
			607	r_cuneate_fasciculus_of_the_medulla - [g/ml{SUVbw}]	0.336632	0.277007	0.278569	0.273132	0.22512	0.210833	0.177633	0.241722	0.176274	0.142402	0.158936	0.154742	0.147933	0.149178	0.125122	0.141118	0.128311	0.151932	0.157995	0.15493	0.17521	0.149268	0.202983		655	r_cerebral_white_matter - [g/ml{SUVbw}]	0.571676	0.343094	0.364553	0.324226	0.340898	0.307122	0.313371	0.29689	0.276302	0.266188	0.237135	0.225561	0.21618	0.20449	0.174811	0.16102	0.15254	0.147053	0.150644
			617	r_cuneate_nucleus_of_the_medulla - [g/ml{SUVbw}]	0.638226	0.371678	0.506784	0.462936	0.410857	0.307563	0.312102	0.310488	0.237889	0.243159	0.238394	0.236147	0.264836	0.204522	0.225928	0.228685	0.246356	0.245845	0.268162	0.231203	0.27189	0.262074	0.295544		855	r_claustral_amygdalar_area - [g/ml{SUVbw}]	0.908036	0.471962	0.532861	0.47532	0.522218	0.47054	0.461634	0.54329	0.391877	0.44303	0.367012	0.383097	0.367539	0.305727	0.308724	0.278555	0.284404	0.281289	0.303716
			819	r_cuneiform_nucleus - [g/ml{SUVbw}]	0.400453	0.292965	0.281408	0.333455	0.184811	0.230796	0.237437	0.190837	0.195544	0.238927	0.159434	0.131248	0.15756	0.165216	0.116161	0.108384	0.131234	0.161266	0.117461	0.109339	0.0916679	0.139549	0.107853		791	r_claustrum - [g/ml{SUVbw}]	0.62612	0.446143	0.461332	0.407562	0.402624	0.391445	0.37656	0.39068	0.338443	0.334621	0.309482	0.306811	0.270488	0.241703	0.236685	0.222062	0.212923	0.216514	0.236706
			593	r_cuneus - [g/ml{SUVbw}]	0.362121	0.294876	0.322142	0.343871	0.277728	0.239846	0.25077	0.219471	0.22087	0.24224	0.194185	0.187551	0.176139	0.148733	0.148695	0.146088	0.143369	0.151586	0.154361	0.154256	0.149703	0.151112	0.157212		997	r_cochlear_nerve - [g/ml{SUVbw}]	0.713594	0.478563	0.426343	0.517756	0.505655	0.474288	0.432736	0.398763	0.408556	0.333345	0.352079	0.357257	0.319562	0.306507	0.29337	0.24482	0.252597	0.274502	0.269271
			931	r_declive - [g/ml{SUVbw}]	0.562204	0.278803	0.331152	0.318301	0.313849	0.282744	0.267802	0.301169	0.273009	0.21943	0.253734	0.200194	0.191826	0.157203	0.135207	0.191788	0.15663	0.176254	0.157746	0.145637	0.175294	0.152816	0.172549		703	r_commissure_of_the_fornix - [g/ml{SUVbw}]	0.626953	0.345551	0.478763	0.2748	0.419507	0.36354	0.330774	0.342297	0.255233	0.285195	0.248399	0.228794	0.214115	0.178586	0.185015	0.15147	0.140502	0.134195	0.13815
			649	r_decussation_of_the_medial_lemniscus - [g/ml{SUVbw}]	0.409343	0.274668	0.664591	0.441337	0.42316	0.243037	0.265886	0.314546	0.183825	0.257974	0.188981	0.201782	0.218607	0.18617	0.173916	0.210066	0.219619	0.189506	0.234071	0.219994	0.221418	0.233322	0.227533		681	r_commissure_of_the_inferior_colliculus - [g/ml{SUVbw}]	0.536617	0.298433	0.326313	0.270372	0.310444	0.314629	0.289837	0.289306	0.239262	0.280252	0.218942	0.181049	0.184774	0.156447	0.147188	0.143817	0.120574	0.117662	0.116584
			757	r_decussation_of_the_superior_cerebellar_peduncle - [g/ml{SUVbw}]	0.266193	0.333585	0.303842	0.199355	0.20938	0.15861	0.158193	0.212645	0.107885	0.136943	0.102409	0.154213	0.137401	0.135416	0.107553	0.0999012	0.119702	0.105924	0.137308	0.112913	0.148344	0.127844	0.136677		711	r_commissure_of_the_superior_colliculus - [g/ml{SUVbw}]	0.481136	0.278046	0.31608	0.246812	0.358817	0.273747	0.297769	0.306594	0.208412	0.245297	0.209243	0.168163	0.161906	0.150323	0.151397	0.134227	0.11097	0.1173	0.12054
			1157	r_decussation_of_the_superior_medullary_velum - [g/ml{SUVbw}]	0.340052	0.319197	0.354625	0.323346	0.245419	0.214188	0.233675	0.207902	0.247782	0.250528	0.164489	0.159021	0.140541	0.15371	0.127542	0.114161	0.126883	0.145811	0.135878	0.0988668	0.0997113	0.137908	0.097461		1119	r_crus_cerebri - [g/ml{SUVbw}]	1.68629	1.43209	1.25723	1.51759	1.16257	1.20042	1.09994	1.20389	1.14719	1.19964	1.01583	1.06347	0.936086	0.833283	0.753077	0.694237	0.71991	0.730975	0.691841
			713	r_decussation_of_the_trochlear_nerve - [g/ml{SUVbw}]	0.347105	0.313104	0.361201	0.330657	0.255118	0.229573	0.24418	0.223261	0.243884	0.272095	0.17441	0.164822	0.146843	0.161333	0.131314	0.120942	0.131308	0.151689	0.140522	0.102449	0.101373	0.139564	0.105506		587	r_cuneate_fasciculus_of_the_medulla - [g/ml{SUVbw}]	0.422216	0.569953	0.610304	0.567002	0.680791	0.575106	0.586307	0.595326	0.583854	0.531272	0.529812	0.447	0.452848	0.439038	0.411129	0.35619	0.393401	0.408911	0.403354
			1083	r_deep_mesencephalic_nucleus - [g/ml{SUVbw}]	0.481795	0.255165	0.269124	0.280607	0.228792	0.271754	0.271461	0.177127	0.206994	0.215443	0.159229	0.146101	0.179653	0.132291	0.113188	0.114463	0.13187	0.149286	0.126335	0.128403	0.107368	0.131026	0.109899		597	r_cuneate_nucleus_of_the_medulla - [g/ml{SUVbw}]	0.443151	0.571668	0.660778	0.584338	0.718087	0.628776	0.647164	0.609953	0.603496	0.571676	0.576429	0.470842	0.472389	0.468993	0.443872	0.376985	0.410623	0.4292	0.423647
			1081	r_deep_white_layer_of_the_superior_colliculus - [g/ml{SUVbw}]	0.617575	0.376202	0.534417	0.276961	0.413098	0.362252	0.348846	0.21775	0.240896	0.352195	0.211791	0.211707	0.186056	0.154753	0.160176	0.188026	0.178166	0.163672	0.191523	0.155852	0.141152	0.150883	0.145654		787	r_cuneiform_nucleus - [g/ml{SUVbw}]	0.53134	0.305726	0.320191	0.252511	0.306323	0.309979	0.262995	0.266595	0.237241	0.234164	0.213312	0.185767	0.19507	0.184309	0.158259	0.167914	0.135235	0.141563	0.136511
			685	r_descending_fibers_of_the_facial_nerve - [g/ml{SUVbw}]	0.488525	0.557019	0.353951	0.367381	0.214776	0.262604	0.3427	0.246157	0.242113	0.246431	0.22713	0.147777	0.177548	0.188211	0.148826	0.144803	0.14579	0.173747	0.137204	0.150014	0.159483	0.177645	0.171573		573	r_cuneus - [g/ml{SUVbw}]	0.662574	0.437765	0.485189	0.430099	0.400695	0.412946	0.386883	0.370604	0.35	0.334435	0.290716	0.280124	0.266749	0.241652	0.207272	0.188282	0.179975	0.167921	0.168672
			1027	r_diffuse_reticular_nucleus - [g/ml{SUVbw}]	0.326261	0.407596	0.280027	0.266936	0.161883	0.235297	0.222864	0.19823	0.197135	0.278086	0.157095	0.129678	0.145337	0.167791	0.122715	0.114128	0.127742	0.151788	0.0973337	0.125853	0.105793	0.141265	0.140225		895	r_declive - [g/ml{SUVbw}]	0.531546	0.285449	0.338141	0.290532	0.28049	0.295592	0.279669	0.256563	0.232544	0.220387	0.212873	0.192262	0.187313	0.184198	0.141099	0.145512	0.144497	0.132444	0.13305
			1047	r_dorsal_acoustic_stria - [g/ml{SUVbw}]	0.415848	0.653743	0.243106	0.488752	0.21692	0.346671	0.239453	0.232598	0.169653	0.170231	0.136046	0.139343	0.0858823	0.103375	0.12239	0.112891	0.0896884	0.104075	0.13299	0.14009	0.101368	0.144974	0.111231		625	r_decussation_of_the_medial_lemniscus - [g/ml{SUVbw}]	0.332355	0.48319	0.613605	0.673349	0.796826	0.792856	0.749355	0.677797	0.634218	0.657473	0.649552	0.533376	0.51798	0.524108	0.514628	0.400367	0.464606	0.458314	0.4819
			661	r_dorsal_motor_nucleus_of_the_vagus_nerve - [g/ml{SUVbw}]	0.159368	0.236079	0.261053	0.316117	0.171501	0.203544	0.212388	0.216681	0.109526	0.196375	0.104409	0.138027	0.0919496	0.0706521	0.114251	0.123856	0.114454	0.123587	0.109881	0.112273	0.143601	0.139538	0.126179		1115	r_decussation_of_the_superior_medullary_velum - [g/ml{SUVbw}]	0.503803	0.264412	0.313029	0.263527	0.293341	0.325193	0.278612	0.283942	0.256755	0.293117	0.209763	0.20057	0.210491	0.177851	0.167863	0.174512	0.135261	0.146972	0.141847
			1057	r_dorsal_paragigantocellular_nucleus - [g/ml{SUVbw}]	0.148305	0.2291	0.234001	0.30306	0.164472	0.174642	0.214155	0.226296	0.090474	0.200062	0.106921	0.135546	0.0890299	0.0715066	0.115049	0.118265	0.116212	0.117464	0.102464	0.107152	0.146354	0.140058	0.116259		689	r_decussation_of_the_trochlear_nerve - [g/ml{SUVbw}]	0.496422	0.251222	0.311706	0.255688	0.27712	0.310641	0.26463	0.266423	0.236921	0.251633	0.202289	0.183732	0.192542	0.171298	0.154676	0.160207	0.126331	0.133257	0.130017
			969	r_dorsal_raphe_nucleus - [g/ml{SUVbw}]	0.311136	0.296635	0.271319	0.261074	0.213532	0.177377	0.211897	0.146144	0.214215	0.179115	0.121328	0.130954	0.136832	0.105926	0.109594	0.0905398	0.104761	0.115598	0.11831	0.0922857	0.103237	0.125178	0.0783464		1037	r_deep_mesencephalic_nucleus - [g/ml{SUVbw}]	0.680808	0.491773	0.409334	0.294035	0.382953	0.393289	0.323536	0.352861	0.310778	0.28	0.258627	0.229598	0.24112	0.248625	0.20797	0.201549	0.174045	0.185404	0.172586
			1061	r_dorsal_reticular_nucleus - [g/ml{SUVbw}]	0.538296	0.555811	0.542622	0.430121	0.504791	0.367578	0.32535	0.452861	0.356888	0.269896	0.276175	0.25712	0.243021	0.174391	0.197551	0.296943	0.235932	0.236216	0.283917	0.238207	0.268454	0.254018	0.27842		1035	r_deep_white_layer_of_the_superior_colliculus - [g/ml{SUVbw}]	0.540945	0.307829	0.329879	0.260384	0.337597	0.30409	0.29363	0.300489	0.237873	0.277796	0.221974	0.180028	0.184671	0.154665	0.148927	0.14253	0.11855	0.11729	0.119252
			1033	r_dorsal_septal_nucleus - [g/ml{SUVbw}]	0.528875	0.0606827	0.221531	0.127478	0.169362	0.181413	0.177751	0.19669	0.135299	0.178826	0.107163	0.101139	0.126397	0.119176	0.104845	0.103411	0.0779944	0.100994	0.0922928	0.0919254	0.0924474	0.103536	0.082839		661	r_descending_fibers_of_the_facial_nerve - [g/ml{SUVbw}]	0.589568	0.909506	0.765634	0.693491	0.716876	0.822401	0.784	0.740455	0.665613	0.636182	0.610228	0.574752	0.553926	0.590132	0.478674	0.456242	0.435355	0.426046	0.447124
			639	r_dorsal_spinocerebellar_tract_of_the_medulla - [g/ml{SUVbw}]	0.645086	0.56678	0.484457	0.370709	0.550638	0.430542	0.322904	0.46603	0.362248	0.307645	0.313955	0.293969	0.302678	0.218795	0.252133	0.317543	0.278552	0.271364	0.32301	0.27549	0.306836	0.277701	0.345125		983	r_diffuse_reticular_nucleus - [g/ml{SUVbw}]	0.735732	0.523728	0.367178	0.373715	0.38952	0.409518	0.337082	0.354776	0.308513	0.280169	0.276749	0.249546	0.269916	0.262444	0.204605	0.206704	0.185822	0.186423	0.189577
			1075	r_dorsal_tegmental_nucleus - [g/ml{SUVbw}]	0.208375	0.420779	0.241594	0.227933	0.165502	0.146761	0.183093	0.168428	0.212701	0.159548	0.125458	0.123161	0.103121	0.146635	0.107963	0.0893806	0.103577	0.120249	0.0998741	0.0873473	0.0970686	0.127332	0.0764619		663	r_dorsal_cochlear_nucleus - [g/ml{SUVbw}]	0.616751	0.429618	0.368727	0.442655	0.446374	0.398215	0.393909	0.362545	0.341104	0.286597	0.291351	0.289962	0.266062	0.261295	0.233797	0.204059	0.207797	0.219874	0.224212
			1085	r_dorsal_terminal_nucleus_of_the_accessory_optic_tract - [g/ml{SUVbw}]	0.300877	0.159391	0.194045	0.245137	0.265384	0.203292	0.343397	0.181949	0.197859	0.152861	0.17739	0.136175	0.13237	0.145366	0.10862	0.101332	0.122192	0.12502	0.10331	0.132233	0.101028	0.0976896	0.124623		639	r_dorsal_motor_nucleus_of_the_vagus_nerve - [g/ml{SUVbw}]	0.526305	0.568419	0.649754	0.594252	0.810436	0.649996	0.691011	0.628905	0.638143	0.553136	0.612842	0.498695	0.483843	0.48666	0.461195	0.374141	0.388777	0.398318	0.416592
			1131	r_endopiriform_nucleus - [g/ml{SUVbw}]	0.55178	0.413347	0.42009	0.25027	0.200129	0.27151	0.223595	0.224518	0.27665	0.226298	0.29141	0.150115	0.214734	0.223527	0.232852	0.226553	0.203256	0.223121	0.251082	0.301731	0.275768	0.325199	0.315967		1009	r_dorsal_paragigantocellular_nucleus - [g/ml{SUVbw}]	0.64551	0.447163	0.646337	0.539316	0.628213	0.568787	0.569079	0.547831	0.552252	0.436175	0.465363	0.460336	0.423765	0.410527	0.374391	0.33831	0.314581	0.345466	0.343867
			841	r_entorhinal_area - [g/ml{SUVbw}]	0.722207	0.739962	0.530175	0.645136	0.516284	0.475458	0.562468	0.419948	0.453827	0.400531	0.43369	0.388661	0.391561	0.36164	0.358146	0.323718	0.353952	0.3669	0.404612	0.383426	0.418885	0.430574	0.43904		933	r_dorsal_raphe_nucleus - [g/ml{SUVbw}]	0.587594	0.344861	0.333886	0.302335	0.361725	0.351016	0.339419	0.332447	0.293968	0.336009	0.271465	0.245826	0.249615	0.196372	0.202891	0.201793	0.175118	0.194317	0.181712
			825	r_external_capsule - [g/ml{SUVbw}]	0.251802	0.187708	0.208646	0.161627	0.183752	0.162003	0.16093	0.164982	0.137174	0.161661	0.156207	0.107721	0.107182	0.151661	0.115426	0.117526	0.126415	0.130871	0.146565	0.154995	0.141521	0.182001	0.147956		987	r_dorsal_septal_nucleus - [g/ml{SUVbw}]	0.44294	0.396625	0.400589	0.269211	0.470322	0.356154	0.336051	0.324091	0.307553	0.291626	0.262133	0.256066	0.257928	0.232362	0.224456	0.159897	0.152468	0.155182	0.167908
			727	r_external_medullary_lamina - [g/ml{SUVbw}]	0.218634	0.19345	0.166962	0.215447	0.158056	0.146188	0.17523	0.188112	0.203997	0.12856	0.188138	0.13398	0.108922	0.111949	0.115917	0.117196	0.13658	0.115662	0.125286	0.126373	0.114494	0.121377	0.128262		617	r_dorsal_spinocerebellar_tract_of_the_medulla - [g/ml{SUVbw}]	0.327182	0.641754	0.564058	0.61185	0.734167	0.646161	0.587643	0.660845	0.679674	0.63539	0.540885	0.515725	0.544407	0.452798	0.479113	0.406015	0.443748	0.443786	0.458286
			827	r_extreme_capsule - [g/ml{SUVbw}]	0.289875	0.271719	0.243213	0.197944	0.2004	0.149948	0.194821	0.193499	0.169225	0.168421	0.157119	0.120092	0.130813	0.173886	0.133056	0.149188	0.138693	0.160096	0.17796	0.183745	0.171203	0.210456	0.177017		1029	r_dorsal_tegmental_nucleus - [g/ml{SUVbw}]	0.581218	0.33735	0.341451	0.316129	0.376709	0.370829	0.318116	0.354094	0.313228	0.325368	0.279181	0.271305	0.259983	0.222723	0.219843	0.21898	0.185357	0.203376	0.194553
			715	r_facial_nucleus - [g/ml{SUVbw}]	0.515695	0.350813	0.480432	0.320882	0.240814	0.290357	0.359943	0.238051	0.273159	0.176283	0.242883	0.138702	0.159985	0.172294	0.157731	0.154024	0.147169	0.188357	0.148567	0.166139	0.182602	0.20937	0.1588		1039	r_dorsal_terminal_nucleus_of_the_accessory_optic_tract - [g/ml{SUVbw}]	0.515956	0.318561	0.411201	0.24498	0.294963	0.322459	0.268836	0.272408	0.268575	0.220677	0.191739	0.200574	0.203426	0.204186	0.157408	0.171061	0.12766	0.155998	0.127134
			803	r_fasciculus_retroflexus_of_the_interbrain - [g/ml{SUVbw}]	0.980198	0.419299	0.566234	0.219551	0.622771	0.450047	0.434293	0.311304	0.532137	0.280647	0.264628	0.399276	0.173844	0.18121	0.155825	0.156321	0.197459	0.166461	0.244945	0.218484	0.174578	0.196702	0.213472		1089	r_endopiriform_nucleus - [g/ml{SUVbw}]	1.19432	0.724405	0.745119	0.633946	0.543951	0.584542	0.649869	0.610376	0.510789	0.535851	0.43759	0.474724	0.454671	0.389174	0.37466	0.343801	0.355539	0.362791	0.392186
			833	r_fasciculus_retroflexus_of_the_midbrain - [g/ml{SUVbw}]	0.376468	0.177525	0.278078	0.168863	0.192201	0.179522	0.145689	0.166826	0.116735	0.150479	0.110251	0.152885	0.113052	0.123284	0.111152	0.115537	0.113028	0.108647	0.118208	0.0981144	0.127704	0.129496	0.136724		805	r_entorhinal_area - [g/ml{SUVbw}]	0.464565	0.907918	0.945067	0.876133	0.924728	0.904662	0.91391	0.849301	0.804853	0.798448	0.783738	0.703657	0.754682	0.663191	0.582317	0.564641	0.544242	0.553317	0.579614
			689	r_fasciolar_gyrus - [g/ml{SUVbw}]	0.168785	0.182939	0.138778	0.113675	0.107443	0.0994587	0.117487	0.148576	0.113522	0.0940494	0.143354	0.112053	0.0987568	0.0939874	0.103319	0.107715	0.099767	0.0897212	0.0864329	0.0934555	0.0917338	0.101445	0.0986205		793	r_external_capsule - [g/ml{SUVbw}]	0.642435	0.458235	0.457637	0.40346	0.376027	0.391354	0.390357	0.38806	0.338701	0.327232	0.31632	0.331796	0.273722	0.255063	0.238909	0.228648	0.223964	0.237783	0.255972
			845	r_field_H - [g/ml{SUVbw}]	0.326803	0.143964	0.264801	0.251197	0.250709	0.226978	0.227778	0.179554	0.197851	0.154495	0.162189	0.124549	0.139464	0.145597	0.116941	0.142421	0.111504	0.135098	0.139549	0.101434	0.0968224	0.136066	0.12972		701	r_external_medullary_lamina - [g/ml{SUVbw}]	0.580183	0.288106	0.398575	0.337432	0.344355	0.329989	0.305363	0.295843	0.286949	0.300341	0.244989	0.240365	0.245004	0.19094	0.165603	0.160234	0.141407	0.142964	0.131139
			731	r_fimbria - [g/ml{SUVbw}]	0.421679	0.310635	0.217468	0.164918	0.1979	0.201459	0.235108	0.198679	0.203496	0.140919	0.172913	0.119335	0.125964	0.121452	0.120752	0.116454	0.125203	0.113791	0.109845	0.128909	0.131068	0.116423	0.131067		795	r_extreme_capsule - [g/ml{SUVbw}]	0.594877	0.482868	0.506166	0.403018	0.378888	0.420715	0.397051	0.384651	0.357047	0.342066	0.326967	0.337279	0.282511	0.258554	0.248913	0.238678	0.231426	0.237268	0.271835
			953	r_flocculus - [g/ml{SUVbw}]	0.373162	0.228912	0.244765	0.242856	0.194322	0.203727	0.258647	0.23597	0.196426	0.233981	0.202604	0.225262	0.142381	0.151022	0.14571	0.153195	0.139827	0.148848	0.168443	0.150637	0.164047	0.13963	0.152853		691	r_facial_nucleus - [g/ml{SUVbw}]	0.478979	0.653282	0.613091	0.628827	0.712115	0.724767	0.658665	0.689173	0.601903	0.618441	0.612546	0.562766	0.50043	0.538005	0.466325	0.416171	0.386714	0.408439	0.437653
			933	r_folium - [g/ml{SUVbw}]	0.284268	0.398588	0.256641	0.29502	0.401392	0.273728	0.249217	0.232182	0.236833	0.229304	0.261334	0.225351	0.232381	0.216717	0.150448	0.185738	0.189667	0.176283	0.194692	0.170002	0.211423	0.207005	0.186976		771	r_fasciculus_retroflexus_of_the_interbrain - [g/ml{SUVbw}]	0.521471	0.266386	0.34373	0.208909	0.346851	0.28493	0.302894	0.328959	0.244612	0.232691	0.200929	0.174996	0.145135	0.178946	0.157575	0.122597	0.106963	0.115747	0.113968
			965	r_fourth_ventricle - [g/ml{SUVbw}]	0.269607	0.42819	0.218684	0.305415	0.184261	0.228696	0.235604	0.240224	0.135698	0.187909	0.139235	0.143511	0.115447	0.103827	0.12487	0.11238	0.112507	0.104528	0.107332	0.114364	0.125774	0.128322	0.106629		801	r_fasciculus_retroflexus_of_the_midbrain - [g/ml{SUVbw}]	1.35219	0.673229	0.799705	0.701026	0.763433	0.66186	0.617947	0.714194	0.663661	0.573521	0.56149	0.602177	0.537223	0.504304	0.451933	0.397244	0.415282	0.425136	0.433344
			885	r_frontal_horn_of_the_lateral_ventricle - [g/ml{SUVbw}]	0.531508	0.179466	0.301934	0.141595	0.240886	0.208962	0.168572	0.212883	0.155428	0.167772	0.12407	0.129388	0.142551	0.129489	0.115332	0.112542	0.0965375	0.111304	0.100931	0.102564	0.106269	0.11443	0.0931161		667	r_fasciolar_gyrus - [g/ml{SUVbw}]	0.880707	0.330236	0.493546	0.373975	0.505753	0.381353	0.378173	0.382538	0.300127	0.383611	0.326614	0.316313	0.288906	0.240625	0.212856	0.208654	0.183553	0.169086	0.176489
			877	r_frontal_white_matter - [g/ml{SUVbw}]	0.360355	0.319591	0.331615	0.311847	0.284761	0.275034	0.257794	0.237046	0.212824	0.229406	0.204039	0.20528	0.198985	0.177125	0.181061	0.18876	0.192777	0.201563	0.214323	0.220082	0.225242	0.248374	0.229302		705	r_fimbria - [g/ml{SUVbw}]	0.69419	0.475667	0.518774	0.485286	0.382804	0.430717	0.450319	0.394452	0.358426	0.337116	0.36485	0.32675	0.315228	0.299328	0.249607	0.246649	0.234172	0.256363	0.260421
		Frontal Cortex	905	r_fronto-orbital_gyrus_macaque - [g/ml{SUVbw}]	0.234518	0.434052	0.274412	0.275118	0.255052	0.228653	0.196974	0.213576	0.27054	0.207141	0.173093	0.189599	0.175879	0.198897	0.178928	0.184735	0.186306	0.226148	0.239122	0.257222	0.251417	0.287196	0.301057		869	r_fronto-orbital_gyrus_macaque - [g/ml{SUVbw}]	0.520675	0.45195	0.529021	0.400831	0.363005	0.421242	0.390165	0.380581	0.382654	0.360153	0.34629	0.343748	0.313964	0.290174	0.276457	0.25967	0.274983	0.275219	0.318445
			599	r_fusiform_gyrus - [g/ml{SUVbw}]	0.243262	0.204074	0.174762	0.167015	0.179364	0.159975	0.157072	0.17465	0.139743	0.155071	0.148443	0.129826	0.123364	0.102001	0.112547	0.11158	0.111107	0.101056	0.112192	0.110728	0.110159	0.104703	0.121614		897	r_folium - [g/ml{SUVbw}]	0.493313	0.334503	0.268811	0.321688	0.316764	0.309858	0.317769	0.330441	0.258287	0.272081	0.245799	0.225478	0.228866	0.207795	0.184258	0.159452	0.174468	0.153906	0.156316
			915	r_genu_of_the_corpus_callosum - [g/ml{SUVbw}]	0.221228	0.34594	0.369806	0.17705	0.299439	0.217074	0.153507	0.186252	0.216022	0.10843	0.133526	0.17837	0.12302	0.141871	0.143917	0.102789	0.125041	0.118487	0.116424	0.150266	0.131092	0.140378	0.134707		929	r_fourth_ventricle - [g/ml{SUVbw}]	0.49657	0.412679	0.454706	0.40618	0.438928	0.424675	0.431533	0.385909	0.408746	0.325662	0.324005	0.308478	0.300436	0.286924	0.257066	0.233995	0.223221	0.231437	0.23417
			1055	r_gigantocellular_nucleus - [g/ml{SUVbw}]	0.380986	0.35908	0.551259	0.528212	0.435411	0.265044	0.344715	0.373089	0.23318	0.282476	0.227375	0.197248	0.221213	0.157295	0.184625	0.221926	0.221576	0.20271	0.24	0.206777	0.231807	0.262675	0.209216		849	r_frontal_horn_of_the_lateral_ventricle - [g/ml{SUVbw}]	0.50408	0.392878	0.380231	0.30714	0.454524	0.351761	0.338792	0.327596	0.313663	0.294719	0.281678	0.266791	0.259299	0.233142	0.229274	0.180999	0.169246	0.166987	0.183067
			627	r_gracile_fasciculus_of_the_medulla - [g/ml{SUVbw}]	0.477718	0.264089	0.367524	0.363913	0.280699	0.233048	0.233691	0.24735	0.199683	0.165707	0.190125	0.181595	0.196258	0.171925	0.169537	0.167477	0.17951	0.188766	0.20131	0.183632	0.219117	0.19767	0.236498		837	r_frontal_white_matter - [g/ml{SUVbw}]	0.49085	0.354887	0.365101	0.350925	0.335866	0.328609	0.329536	0.312185	0.297488	0.282034	0.269276	0.257734	0.23885	0.228086	0.211823	0.192832	0.196088	0.210021	0.225455
			939	r_gracile_lobule - [g/ml{SUVbw}]	0.338695	0.374512	0.190446	0.230461	0.154604	0.144016	0.148665	0.213735	0.157206	0.136717	0.150579	0.136863	0.125149	0.11316	0.121854	0.11273	0.0969418	0.117198	0.115336	0.125887	0.127383	0.113953	0.143727	411	589	r_gracile_nucleus_of_the_medulla - [g/ml{SUVbw}]	0.526575	0.645005	0.760236	0.644631	0.811852	0.681652	0.729841	0.628669	0.668368	0.611233	0.640457	0.51264	0.515877	0.499917	0.465462	0.402831	0.418123	0.433996	0.458714
			609	r_gracile_nucleus_of_the_medulla - [g/ml{SUVbw}]	0.290674	0.200564	0.349036	0.288797	0.153492	0.195107	0.171174	0.179756	0.150864	0.150312	0.0977824	0.139866	0.123296	0.113779	0.115631	0.120283	0.117442	0.121762	0.117161	0.120761	0.1478	0.119918	0.161877		579	r_fusiform_gyrus - [g/ml{SUVbw}]	0.657894	0.399264	0.411406	0.421646	0.37091	0.377332	0.366157	0.340857	0.338271	0.335404	0.301842	0.288736	0.267158	0.258103	0.222588	0.218991	0.205411	0.217384	0.224501
			1101	r_granular_layer_of_the_dentate_gyrus - [g/ml{SUVbw}]	0.396868	0.309244	0.260016	0.253444	0.254196	0.270661	0.267276	0.228548	0.228652	0.179563	0.211432	0.16108	0.148393	0.156509	0.152731	0.137309	0.14149	0.143304	0.157388	0.15046	0.170274	0.154753	0.184002		879	r_genu_of_the_corpus_callosum - [g/ml{SUVbw}]	0.485902	0.296081	0.283102	0.391592	0.326839	0.272206	0.267258	0.250543	0.252828	0.24229	0.234909	0.20393	0.237147	0.157669	0.159751	0.147375	0.141513	0.130779	0.176655
			1119	r_hilus_of_the_dentate_gyrus - [g/ml{SUVbw}]	0.443602	0.316293	0.304079	0.272873	0.280978	0.299862	0.310412	0.238529	0.24371	0.206001	0.22281	0.170267	0.154651	0.179885	0.16317	0.144739	0.154715	0.154477	0.172416	0.161936	0.189589	0.165379	0.201648		1007	r_gigantocellular_nucleus - [g/ml{SUVbw}]	0.361468	0.379347	0.570328	0.623531	0.7704	0.684971	0.685526	0.651466	0.587658	0.64697	0.592857	0.444413	0.486236	0.461148	0.457559	0.390504	0.420969	0.433745	0.43991
			1125	r_hippocampal-amygdaloid_transition_area - [g/ml{SUVbw}]	0.337478	0.40549	0.562529	0.43188	0.438863	0.282454	0.381263	0.308503	0.360981	0.354694	0.26169	0.235628	0.248818	0.259753	0.18095	0.222233	0.210755	0.231745	0.245726	0.235422	0.271502	0.220866	0.27659		607	r_gracile_fasciculus_of_the_medulla - [g/ml{SUVbw}]	0.503793	0.643327	0.773388	0.725033	0.818342	0.735278	0.756995	0.665119	0.691548	0.666866	0.653489	0.555924	0.544911	0.528378	0.483238	0.427905	0.445618	0.470072	0.508666
			641	r_hypoglossal_nucleus - [g/ml{SUVbw}]	0.328693	0.239522	0.558207	0.388392	0.319168	0.212903	0.222709	0.26831	0.171864	0.230765	0.155747	0.167508	0.174216	0.147724	0.147584	0.177471	0.178031	0.155151	0.185427	0.173336	0.189187	0.192292	0.192728		903	r_gracile_lobule - [g/ml{SUVbw}]	0.46835	0.356016	0.372807	0.324389	0.366665	0.331796	0.358297	0.345382	0.325461	0.320097	0.322307	0.278853	0.244254	0.24723	0.215016	0.196858	0.221378	0.230281	0.200264
		Hypothalamus	1147	r_hypothalamus - [g/ml{SUVbw}]	0.319875	0.321573	0.274393	0.371889	0.382352	0.276581	0.27081	0.260358	0.272022	0.228565	0.239355	0.173102	0.178426	0.190401	0.149434	0.170513	0.14827	0.176704	0.177598	0.173263	0.165929	0.186984	0.177565		1105	r_hypothalamus - [g/ml{SUVbw}]	1.19004	0.930959	0.927859	0.678682	0.896464	0.778863	0.763409	0.70037	0.688352	0.674014	0.656266	0.648395	0.630905	0.495518	0.51611	0.492793	0.456326	0.494698	0.500935
			637	r_inferior_cerebellar_peduncle - [g/ml{SUVbw}]	0.453977	0.403422	0.349296	0.358792	0.358198	0.283664	0.227509	0.259042	0.220067	0.206222	0.181572	0.151314	0.111343	0.136127	0.130355	0.151197	0.116037	0.141392	0.155066	0.160413	0.136852	0.156863	0.148408		1059	r_granular_layer_of_the_dentate_gyrus - [g/ml{SUVbw}]	0.593318	0.526812	0.570683	0.565384	0.503502	0.512853	0.51193	0.499614	0.494242	0.495919	0.43102	0.417993	0.395631	0.374157	0.332516	0.320247	0.316168	0.329284	0.341577
			961	r_inferior_colliculus_-_not_otherwise_specified - [g/ml{SUVbw}]	0.428438	0.346624	0.450219	0.398803	0.444025	0.317429	0.348606	0.272831	0.251135	0.393384	0.235044	0.216664	0.173718	0.181808	0.164597	0.162548	0.154382	0.176202	0.180885	0.133187	0.118963	0.151716	0.143809		763	r_habenular_commissure - [g/ml{SUVbw}]	0.447011	0.231772	0.275254	0.2159	0.331545	0.262703	0.308054	0.286343	0.212056	0.204459	0.189215	0.153765	0.134641	0.157809	0.148159	0.118858	0.0995906	0.113	0.110084
		Frontal Cortex	903	r_inferior_frontal_gyrus - [g/ml{SUVbw}]	0.239124	0.340423	0.23583	0.265766	0.251694	0.244208	0.202537	0.223585	0.190638	0.187483	0.17058	0.183025	0.167751	0.177319	0.181511	0.190987	0.196298	0.197754	0.198538	0.222588	0.208077	0.230962	0.230626		867	r_inferior_frontal_gyrus - [g/ml{SUVbw}]	0.384088	0.305315	0.33214	0.298589	0.311474	0.300726	0.309741	0.277854	0.276453	0.274934	0.257826	0.243195	0.231477	0.214815	0.195766	0.184333	0.189978	0.202053	0.227815
			595	r_inferior_occipital_gyrus - [g/ml{SUVbw}]	0.213515	0.258459	0.231573	0.246981	0.259037	0.169224	0.164258	0.174373	0.148354	0.139075	0.126947	0.113793	0.115097	0.0998474	0.109673	0.0924168	0.0939879	0.0960467	0.101662	0.104153	0.09172	0.106813	0.113133		1083	r_hippocampal-amygdaloid_transition_area - [g/ml{SUVbw}]	1.24176	1.03844	0.950084	1.2909	0.845684	0.919848	0.870119	0.951968	0.921773	0.890849	0.78872	0.786546	0.712999	0.580774	0.560937	0.547357	0.585159	0.573978	0.559044
			669	r_inferior_olivary_complex_-_not_otherwise_specified - [g/ml{SUVbw}]	0.410045	0.384226	0.483341	0.468669	0.387905	0.299182	0.375833	0.346387	0.276195	0.253663	0.265286	0.18971	0.200326	0.16989	0.207217	0.215252	0.215374	0.228383	0.23219	0.215773	0.239177	0.285404	0.21045		619	r_hypoglossal_nucleus - [g/ml{SUVbw}]	0.469952	0.583159	0.68562	0.679454	0.911072	0.764132	0.77647	0.696563	0.696597	0.652546	0.672715	0.557388	0.530383	0.541588	0.51783	0.407162	0.442526	0.445222	0.477175
			741	r_inferior_pulvinar_nucleus - [g/ml{SUVbw}]	0.237908	0.164667	0.218846	0.158166	0.108874	0.146644	0.166402	0.172498	0.095097	0.119744	0.127599	0.0966089	0.0709317	0.0827926	0.0892981	0.0802536	0.0785791	0.0825318	0.0753534	0.0950266	0.0921651	0.0857449	0.0909563	414	1077	r_hilus_of_the_dentate_gyrus - [g/ml{SUVbw}]	0.593879	0.601817	0.592707	0.617355	0.525574	0.561636	0.553581	0.534391	0.554752	0.533556	0.468545	0.449597	0.424282	0.398789	0.360643	0.34785	0.347752	0.362416	0.37981
			1053	r_inferior_salivatory_nucleus - [g/ml{SUVbw}]	0.175175	0.349622	0.21616	0.384747	0.193207	0.237494	0.242003	0.225208	0.134476	0.178203	0.121646	0.142826	0.0733063	0.0702111	0.110222	0.122668	0.102634	0.120286	0.121444	0.116136	0.128465	0.151522	0.114575		615	r_inferior_cerebellar_peduncle - [g/ml{SUVbw}]	0.550232	0.469118	0.474327	0.485286	0.523924	0.462158	0.433285	0.464844	0.439724	0.368805	0.406217	0.358668	0.350421	0.322301	0.319855	0.26905	0.279477	0.297371	0.277748
			943	r_inferior_semilunar_lobule - [g/ml{SUVbw}]	0.485625	0.348421	0.225986	0.201519	0.199139	0.219146	0.150905	0.20002	0.180969	0.131701	0.148467	0.147458	0.12806	0.106514	0.12808	0.108228	0.0999236	0.124396	0.128119	0.139781	0.119615	0.130416	0.139913		925	r_inferior_colliculus_-_not_otherwise_specified - [g/ml{SUVbw}]	0.492834	0.263161	0.319734	0.280442	0.269752	0.326641	0.275919	0.272252	0.238932	0.241424	0.206333	0.175101	0.179716	0.157695	0.143734	0.137304	0.119394	0.114719	0.112538
			651	r_inferior_temporal_gyrus - [g/ml{SUVbw}]	0.338987	0.296441	0.259101	0.325688	0.254185	0.218863	0.227562	0.217832	0.213775	0.178043	0.168848	0.153542	0.152942	0.137577	0.131762	0.133968	0.136607	0.141502	0.142362	0.144752	0.152305	0.154031	0.159574	438	1019	r_interposed_nucleus_of_the_medulla - [g/ml{SUVbw}]	0.549293	0.389958	0.47418	0.394532	0.444157	0.411779	0.418723	0.387235	0.420369	0.312534	0.312101	0.334059	0.303985	0.306211	0.267856	0.241498	0.227826	0.239343	0.245069
			657	r_inferior_vestibular_nucleus - [g/ml{SUVbw}]	0.273178	0.391992	0.240509	0.386805	0.208006	0.306885	0.227837	0.201168	0.147952	0.166474	0.115824	0.139282	0.0841594	0.0730065	0.11287	0.116437	0.0938494	0.114972	0.122103	0.129393	0.116745	0.13756	0.118412		575	r_inferior_occipital_gyrus - [g/ml{SUVbw}]	0.886511	0.571775	0.551356	0.510659	0.505034	0.491223	0.447535	0.44651	0.430526	0.440246	0.377761	0.372139	0.353253	0.30549	0.272417	0.234943	0.249553	0.240321	0.237417
			1137	r_inner_portion_of_the_medial_globus_pallidus - [g/ml{SUVbw}]	0.295839	0.460196	0.261416	0.518479	0.335812	0.347189	0.325438	0.256069	0.346382	0.257811	0.222627	0.166179	0.208431	0.18266	0.131104	0.142891	0.137526	0.178602	0.161495	0.165461	0.136483	0.155828	0.148394		647	r_inferior_olivary_complex_-_not_otherwise_specified - [g/ml{SUVbw}]	0.317713	0.419055	0.540352	0.614204	0.718755	0.636621	0.640484	0.619507	0.594902	0.640505	0.5614	0.443029	0.472136	0.442483	0.454806	0.399308	0.396008	0.425444	0.433748
			831	r_insula - [g/ml{SUVbw}]	0.269194	0.186872	0.183091	0.246074	0.196235	0.12933	0.176683	0.14828	0.117087	0.140232	0.128263	0.12204	0.0760552	0.119199	0.0951309	0.0999288	0.113212	0.10666	0.114119	0.109017	0.118619	0.132046	0.149352		715	r_inferior_pulvinar_nucleus - [g/ml{SUVbw}]	0.877352	0.359784	0.524114	0.413701	0.40715	0.363027	0.370443	0.38363	0.34937	0.356599	0.309887	0.304014	0.270251	0.305509	0.209697	0.211266	0.185788	0.21411	0.177153
			1051	r_intermediate_reticular_nucleus - [g/ml{SUVbw}]	0.525026	0.514886	0.52995	0.47145	0.491024	0.360136	0.352628	0.447321	0.337742	0.280056	0.263739	0.244713	0.23541	0.169189	0.197696	0.278014	0.226522	0.229212	0.269538	0.226884	0.262919	0.254206	0.259972		1005	r_inferior_salivatory_nucleus - [g/ml{SUVbw}]	0.582169	0.473434	0.550454	0.486951	0.618573	0.526847	0.540107	0.51247	0.499226	0.404702	0.480107	0.408687	0.387954	0.374947	0.370013	0.310972	0.31235	0.330687	0.354334
			633	r_internal_arcuate_fibers - [g/ml{SUVbw}]	0.524797	0.34438	0.582601	0.430879	0.399193	0.285233	0.282661	0.324016	0.224214	0.258778	0.209902	0.214272	0.230799	0.183563	0.185523	0.221898	0.219573	0.19654	0.237987	0.214452	0.230525	0.220874	0.258003		907	r_inferior_semilunar_lobule - [g/ml{SUVbw}]	0.527162	0.398615	0.361316	0.403735	0.429103	0.378103	0.400802	0.36174	0.387385	0.338242	0.334856	0.334978	0.277553	0.279309	0.249692	0.244712	0.234659	0.261525	0.252538
			745	r_internal_capsule - [g/ml{SUVbw}]	0.409322	0.324617	0.198433	0.211779	0.238836	0.232546	0.216905	0.169707	0.175351	0.197372	0.161408	0.139261	0.113248	0.129057	0.129369	0.123672	0.109522	0.116601	0.12545	0.130653	0.142524	0.125746	0.13932		627	r_inferior_temporal_gyrus - [g/ml{SUVbw}]	0.481882	0.372155	0.389052	0.400966	0.358901	0.340333	0.347319	0.339515	0.322092	0.328797	0.293492	0.278449	0.272248	0.250572	0.239615	0.225729	0.228101	0.237025	0.252566
			693	r_internal_genu_of_the_facial_nerve - [g/ml{SUVbw}]	0.189351	0.785092	0.169075	0.200592	0.113587	0.143869	0.200092	0.218416	0.179473	0.157363	0.135347	0.116583	0.0676243	0.171185	0.102247	0.101425	0.099897	0.103055	0.0954556	0.0954319	0.096906	0.136601	0.0779208		841	r_inferior_thalamic_peduncle - [g/ml{SUVbw}]	0.573154	0.342563	0.362035	0.245079	0.449861	0.360579	0.346998	0.261646	0.312998	0.25796	0.287124	0.238181	0.272099	0.178405	0.208233	0.16512	0.153896	0.159589	0.191363
			807	r_internal_medullary_lamina - [g/ml{SUVbw}]	0.508792	0.179725	0.365971	0.220091	0.350983	0.307687	0.305497	0.242292	0.25053	0.239814	0.162899	0.21258	0.128034	0.127044	0.139493	0.135265	0.134319	0.134332	0.178202	0.150157	0.145033	0.16205	0.20114		635	r_inferior_vestibular_nucleus - [g/ml{SUVbw}]	0.519634	0.473238	0.468683	0.410394	0.510283	0.415696	0.465554	0.421246	0.413724	0.324805	0.388014	0.316457	0.317628	0.306249	0.284758	0.246451	0.248847	0.256309	0.25959
			783	r_interpeduncular_nucleus - [g/ml{SUVbw}]	0.272182	0.333606	0.321557	0.231839	0.244691	0.177667	0.18261	0.213741	0.135231	0.151134	0.116755	0.154384	0.140304	0.142102	0.128208	0.112267	0.128391	0.123041	0.15156	0.12664	0.159253	0.142991	0.154257		1095	r_inner_portion_of_the_medial_globus_pallidus - [g/ml{SUVbw}]	1.14167	0.817905	0.899825	0.676035	0.731768	0.697132	0.698724	0.650647	0.589698	0.618445	0.604568	0.580399	0.569146	0.456012	0.481567	0.461757	0.419218	0.463129	0.46688
			643	r_interpolar_part_of_the_spinal_trigeminal_nucleus - [g/ml{SUVbw}]	0.487685	0.525358	0.488886	0.363194	0.486553	0.342223	0.283496	0.414251	0.327351	0.230768	0.265684	0.240936	0.222729	0.169135	0.180714	0.277542	0.217481	0.226042	0.260947	0.226766	0.254499	0.239461	0.266855		799	r_insula - [g/ml{SUVbw}]	0.517077	0.354963	0.337787	0.309336	0.324239	0.289202	0.257736	0.264847	0.255975	0.251941	0.235209	0.20722	0.190226	0.168162	0.163644	0.14988	0.137971	0.133011	0.138708
			1065	r_interposed_nucleus_of_the_medulla - [g/ml{SUVbw}]	0.18704	0.691619	0.141492	0.306044	0.130264	0.174895	0.24369	0.262025	0.122244	0.173584	0.129158	0.138407	0.071359	0.10278	0.111449	0.109748	0.105597	0.100938	0.100649	0.106533	0.120733	0.142117	0.0942519		1003	r_intermediate_reticular_nucleus - [g/ml{SUVbw}]	0.464049	0.520413	0.557512	0.581494	0.713376	0.598821	0.592509	0.585419	0.581942	0.529497	0.542947	0.448786	0.467141	0.415218	0.443338	0.358884	0.383209	0.391598	0.419097
			701	r_isthmus_of_the_cingulate_gyrus - [g/ml{SUVbw}]	0.45374	0.410039	0.260851	0.276895	0.329319	0.199877	0.269605	0.219433	0.24869	0.202831	0.188663	0.159433	0.161098	0.140235	0.160487	0.145767	0.171713	0.160446	0.126115	0.169967	0.130671	0.15792	0.160167		613	r_internal_arcuate_fibers - [g/ml{SUVbw}]	0.323529	0.496779	0.624767	0.673665	0.790881	0.781826	0.739831	0.679848	0.648812	0.66169	0.654663	0.530387	0.530401	0.524029	0.525076	0.407171	0.467317	0.466486	0.489601
			871	r_lateral_amygdalar_nucleus - [g/ml{SUVbw}]	0.675708	0.635558	0.563927	0.418621	0.368325	0.491928	0.352619	0.285454	0.412547	0.307579	0.328415	0.271219	0.266929	0.20659	0.23536	0.231564	0.240249	0.22878	0.275629	0.270406	0.289288	0.321877	0.371187		719	r_internal_capsule - [g/ml{SUVbw}]	0.450223	0.351404	0.324994	0.32986	0.2913	0.296678	0.300481	0.256147	0.268645	0.26441	0.234466	0.198273	0.205646	0.185512	0.173976	0.154636	0.150176	0.141731	0.140893
			1045	r_lateral_aperture_of_the_fourth_ventricle - [g/ml{SUVbw}]	0.596495	0.21203	0.381038	0.358196	0.444911	0.278385	0.231872	0.23109	0.243147	0.199505	0.186533	0.148396	0.105622	0.111986	0.135676	0.148271	0.10194	0.141403	0.154271	0.171837	0.134658	0.137151	0.133622		671	r_internal_genu_of_the_facial_nerve - [g/ml{SUVbw}]	0.581264	0.322939	0.387087	0.391758	0.409868	0.407	0.341775	0.389073	0.370902	0.320683	0.294682	0.328513	0.284834	0.260565	0.250129	0.240492	0.207202	0.229271	0.218876
			615	r_lateral_corticospinal_tract_of_the_medulla - [g/ml{SUVbw}]	0.800981	0.458306	0.517346	0.482549	0.495836	0.387018	0.368808	0.385833	0.299124	0.305259	0.283087	0.287184	0.323818	0.232642	0.267235	0.281519	0.286027	0.283513	0.316856	0.264308	0.299783	0.291071	0.341002		775	r_internal_medullary_lamina - [g/ml{SUVbw}]	0.495592	0.353283	0.352929	0.308508	0.369566	0.304605	0.300203	0.310049	0.352487	0.293522	0.26246	0.231188	0.23105	0.187881	0.183919	0.152611	0.148363	0.136551	0.142148
			809	r_lateral_dorsal_nucleus - [g/ml{SUVbw}]	0.579356	0.244804	0.475315	0.191715	0.510431	0.280986	0.321106	0.313562	0.310758	0.268294	0.18131	0.324531	0.14585	0.1146	0.152928	0.141004	0.167565	0.164953	0.218516	0.173661	0.160915	0.18079	0.257085		749	r_interpeduncular_nucleus - [g/ml{SUVbw}]	1.39691	0.966188	1.09287	0.962479	1.05761	0.853128	0.858877	0.877118	0.826339	0.79892	0.739105	0.786008	0.724956	0.641521	0.579985	0.497796	0.526661	0.548622	0.542815
			801	r_lateral_geniculate_nucleus - [g/ml{SUVbw}]	0.341768	0.244654	0.251555	0.0798461	0.153763	0.173018	0.153209	0.192208	0.151244	0.125248	0.116688	0.0918096	0.0892785	0.0888058	0.0774061	0.0933933	0.0820174	0.077856	0.075502	0.104553	0.107439	0.0898399	0.0886765		621	r_interpolar_part_of_the_spinal_trigeminal_nucleus - [g/ml{SUVbw}]	0.407341	0.605763	0.588003	0.601741	0.723637	0.599771	0.570368	0.649436	0.616282	0.570867	0.533218	0.480479	0.509022	0.439073	0.462505	0.373946	0.407394	0.414863	0.421534
		Striatum	837	r_lateral_globus_pallidus - [g/ml{SUVbw}]	0.269429	0.426518	0.226966	0.178445	0.0679392	0.250474	0.117757	0.14619	0.229646	0.196892	0.132337	0.11899	0.0929938	0.109934	0.095852	0.102646	0.14122	0.105573	0.0939471	0.123567	0.113767	0.126034	0.138168
			787	r_lateral_habenular_nucleus - [g/ml{SUVbw}]	0.844372	0.443895	0.456845	0.227117	0.538661	0.474373	0.433453	0.287038	0.454022	0.284283	0.270128	0.349682	0.175508	0.18576	0.157693	0.166808	0.197855	0.155364	0.239452	0.221584	0.170385	0.190373	0.179514		839	r_interventricular_foramen - [g/ml{SUVbw}]	0.474513	0.269077	0.317241	0.238992	0.369492	0.320587	0.322119	0.247549	0.286309	0.259441	0.2433	0.209446	0.244087	0.171744	0.191212	0.141694	0.133638	0.125131	0.158833
			981	r_lateral_hypothalamic_area_-_not_otherwise_specified - [g/ml{SUVbw}]	0.289082	0.207485	0.313293	0.282039	0.283743	0.228155	0.219479	0.22135	0.253125	0.227179	0.198997	0.151447	0.16853	0.167808	0.129943	0.158143	0.133677	0.144515	0.165292	0.134241	0.144453	0.171343	0.17464		677	r_isthmus_of_the_cingulate_gyrus - [g/ml{SUVbw}]	0.680065	0.31839	0.435799	0.367759	0.406953	0.450915	0.337423	0.359495	0.293189	0.27598	0.264258	0.237477	0.239597	0.191493	0.1723	0.163022	0.157526	0.13312	0.134064
			711	r_lateral_lemniscus - [g/ml{SUVbw}]	0.315663	0.262775	0.249552	0.270474	0.228966	0.205964	0.205685	0.184017	0.152624	0.186474	0.14048	0.118579	0.188393	0.11972	0.125271	0.126455	0.128689	0.166647	0.106767	0.13664	0.145389	0.13152	0.140648		831	r_lateral_amygdalar_nucleus - [g/ml{SUVbw}]	0.633483	0.506349	0.571334	0.487875	0.587965	0.517063	0.497008	0.545727	0.461295	0.494171	0.427518	0.431731	0.432734	0.387327	0.348892	0.327417	0.321065	0.338521	0.362897
			853	r_lateral_mammillary_nucleus - [g/ml{SUVbw}]	0.308495	0.270199	0.360532	0.31536	0.309113	0.244274	0.252672	0.258346	0.297535	0.267642	0.221226	0.17238	0.199727	0.191022	0.150504	0.183813	0.154572	0.168373	0.190908	0.167681	0.17859	0.208507	0.21841		999	r_lateral_aperture_of_the_fourth_ventricle - [g/ml{SUVbw}]	0.833691	0.560329	0.525058	0.62596	0.599481	0.608331	0.504226	0.469068	0.520653	0.425027	0.464598	0.464521	0.404706	0.375028	0.382207	0.30712	0.315857	0.350139	0.327645
			835	r_lateral_medullary_lamina - [g/ml{SUVbw}]	0.265295	0.396234	0.223301	0.161121	0.0647828	0.252298	0.113072	0.141156	0.195791	0.188767	0.130081	0.115969	0.0942428	0.108708	0.0955007	0.0955863	0.136628	0.10244	0.093222	0.122478	0.11113	0.124507	0.136146		595	r_lateral_corticospinal_tract_of_the_medulla - [g/ml{SUVbw}]	0.319901	0.541771	0.601297	0.656457	0.741584	0.751331	0.700172	0.688984	0.675025	0.678563	0.648848	0.55047	0.555352	0.50491	0.524404	0.437664	0.477133	0.489088	0.505335
		Frontal Cortex	907	r_lateral_orbital_gyrus - [g/ml{SUVbw}]	0.372407	0.25656	0.282428	0.315351	0.264248	0.265044	0.221402	0.251242	0.255014	0.221504	0.218058	0.194014	0.180749	0.186788	0.177639	0.187064	0.200606	0.212254	0.232317	0.220745	0.236572	0.248495	0.238818		871	r_lateral_orbital_gyrus - [g/ml{SUVbw}]	0.65167	0.455384	0.460917	0.420078	0.433154	0.425248	0.402388	0.384042	0.382778	0.34172	0.330672	0.310603	0.329883	0.292381	0.274089	0.250459	0.255355	0.288041	0.320999
			975	r_lateral_parabrachial_nucleus - [g/ml{SUVbw}]	0.288279	0.468018	0.27936	0.349236	0.166202	0.225965	0.229879	0.228227	0.19195	0.264997	0.162183	0.132017	0.124179	0.200737	0.126374	0.113567	0.129281	0.145416	0.117676	0.110959	0.093905	0.14249	0.121539		769	r_lateral_geniculate_nucleus - [g/ml{SUVbw}]	0.819956	0.508498	0.587196	0.550411	0.418649	0.442709	0.504117	0.450055	0.362826	0.318022	0.406979	0.32315	0.336059	0.368426	0.267228	0.257308	0.24374	0.282073	0.263007
			743	r_lateral_pulvinar_nucleus - [g/ml{SUVbw}]	0.227107	0.16125	0.154148	0.163328	0.158363	0.129784	0.178867	0.16227	0.127017	0.100892	0.178744	0.100419	0.0843594	0.114511	0.0918787	0.107968	0.126675	0.10927	0.104526	0.110858	0.104839	0.0980227	0.101707		753	r_lateral_habenular_nucleus - [g/ml{SUVbw}]	0.547086	0.256294	0.356116	0.203604	0.365186	0.28761	0.301369	0.332301	0.231138	0.238248	0.199758	0.177362	0.147248	0.176163	0.157637	0.123763	0.104951	0.116606	0.11727
			653	r_lateral_reticular_nucleus - [g/ml{SUVbw}]	0.601428	0.468321	0.546273	0.472196	0.509365	0.370472	0.409044	0.447786	0.347242	0.277363	0.277086	0.230186	0.233069	0.180107	0.208612	0.263654	0.223175	0.2391	0.258871	0.232554	0.277885	0.26972	0.258756		943	r_lateral_hypothalamic_area_-_not_otherwise_specified - [g/ml{SUVbw}]	1.48746	0.979225	0.952274	0.937361	0.929772	0.885179	0.82852	0.89229	0.812748	0.762882	0.694165	0.754515	0.669069	0.561472	0.574187	0.539346	0.530486	0.579782	0.553697
			887	r_lateral_septal_nucleus - [g/ml{SUVbw}]	0.556283	0.0794929	0.245942	0.101003	0.286841	0.222698	0.180324	0.227041	0.152989	0.181629	0.130723	0.113083	0.114144	0.117959	0.109667	0.124277	0.0924177	0.122847	0.111849	0.102553	0.103303	0.114453	0.0931318		687	r_lateral_lemniscus - [g/ml{SUVbw}]	0.889402	0.791787	0.514697	0.411916	0.453502	0.537121	0.426891	0.482297	0.427214	0.356608	0.355955	0.323531	0.344383	0.351906	0.293293	0.289003	0.267498	0.283485	0.258336
			1093	r_lateral_vestibulospinal_tract - [g/ml{SUVbw}]	0.424246	0.393972	0.474215	0.518369	0.432524	0.336636	0.373235	0.406519	0.287776	0.25956	0.235523	0.207999	0.192011	0.139675	0.178096	0.234513	0.195234	0.211888	0.228512	0.20098	0.241396	0.245586	0.213554		813	r_lateral_mammillary_nucleus - [g/ml{SUVbw}]	1.7114	1.15274	1.14132	1.18963	1.10973	1.07023	1.00501	1.09138	1.00194	0.939607	0.854416	0.945831	0.807355	0.713123	0.694217	0.648238	0.646752	0.687708	0.654737
			1063	r_laterodorsal_tegmental_nucleus - [g/ml{SUVbw}]	0.27531	0.378757	0.284444	0.290116	0.182649	0.182583	0.20538	0.18532	0.220372	0.196724	0.142506	0.135107	0.12577	0.157692	0.114862	0.0984286	0.117625	0.13626	0.112469	0.0928407	0.0946345	0.13399	0.0858212	444	777	r_lateral_dorsal_nucleus - [g/ml{SUVbw}]	0.593053	0.443306	0.472732	0.367277	0.37733	0.36407	0.318556	0.439802	0.343555	0.338331	0.312572	0.24072	0.228605	0.22211	0.20155	0.16071	0.166966	0.157007	0.146315
			1091	r_limitans_nucleus - [g/ml{SUVbw}]	0.836436	0.343036	0.381896	0.266562	0.572295	0.426501	0.44047	0.309113	0.356987	0.289343	0.252638	0.259497	0.179516	0.258565	0.152063	0.154691	0.190043	0.16022	0.187371	0.212545	0.139526	0.175391	0.161318		939	r_lateral_parabrachial_nucleus - [g/ml{SUVbw}]	0.521018	0.287039	0.311337	0.275026	0.285089	0.311207	0.259063	0.270027	0.241092	0.216433	0.20343	0.18857	0.19195	0.183342	0.156475	0.160279	0.130924	0.135228	0.137645
			759	r_linear_nucleus - [g/ml{SUVbw}]	0.196566	0.329064	0.305498	0.189278	0.196807	0.16067	0.163525	0.215269	0.100927	0.118612	0.0985341	0.153646	0.1276	0.128032	0.1038	0.0977464	0.117586	0.101079	0.131521	0.102114	0.140308	0.118195	0.122697		1011	r_lateral_paragigantocellular_nucleus - [g/ml{SUVbw}]	0.350921	0.594351	0.615896	0.665259	0.735302	0.775087	0.694782	0.735012	0.664337	0.711053	0.647874	0.592055	0.512171	0.57413	0.490374	0.460564	0.412201	0.433475	0.448828
			591	r_lingual_gyrus - [g/ml{SUVbw}]	0.296509	0.231774	0.187806	0.24045	0.192478	0.177223	0.182525	0.158423	0.132715	0.180136	0.131495	0.135257	0.141092	0.104018	0.111226	0.0996534	0.101486	0.099926	0.115979	0.109383	0.108559	0.103997	0.115512		717	r_lateral_pulvinar_nucleus - [g/ml{SUVbw}]	0.417074	0.23852	0.410148	0.311274	0.26095	0.320792	0.289339	0.299704	0.251229	0.294609	0.215768	0.247297	0.235633	0.186052	0.139987	0.153081	0.126766	0.143344	0.119374
			917	r_lingula - [g/ml{SUVbw}]	0.276242	0.546751	0.278284	0.325017	0.206781	0.21482	0.275027	0.339536	0.229247	0.259074	0.182775	0.170407	0.118673	0.192408	0.132031	0.1201	0.126089	0.117215	0.126991	0.10697	0.107639	0.130991	0.0950131		629	r_lateral_reticular_nucleus - [g/ml{SUVbw}]	0.36002	0.538083	0.558515	0.641091	0.765447	0.654899	0.643073	0.638596	0.650914	0.640401	0.588634	0.482527	0.515698	0.4538	0.492043	0.397616	0.416173	0.432742	0.45999
			923	r_lobule_II - [g/ml{SUVbw}]	0.415954	0.441725	0.416814	0.434114	0.460526	0.370501	0.356381	0.340287	0.266127	0.374167	0.254304	0.229821	0.172758	0.208256	0.171661	0.152712	0.147171	0.153816	0.176813	0.123331	0.116744	0.142364	0.127575		851	r_lateral_septal_nucleus - [g/ml{SUVbw}]	0.584685	0.512045	0.486941	0.30067	0.618209	0.416646	0.408804	0.379169	0.368995	0.348612	0.332926	0.325982	0.317266	0.286539	0.271491	0.230925	0.218931	0.219102	0.241032
			925	r_lobule_III - [g/ml{SUVbw}]	0.5652	0.411477	0.467245	0.436105	0.729166	0.451113	0.332302	0.29608	0.268106	0.375942	0.271731	0.287966	0.218261	0.203034	0.179943	0.1618	0.173769	0.174	0.201392	0.15076	0.130606	0.148267	0.142649		953	r_lateral_vestibular_nucleus - [g/ml{SUVbw}]	0.45437	0.343114	0.319556	0.328902	0.367033	0.335047	0.324019	0.285347	0.307843	0.226337	0.222571	0.229071	0.234555	0.216096	0.190497	0.16507	0.153017	0.164572	0.176052
			927	r_lobule_IV - [g/ml{SUVbw}]	0.641094	0.31756	0.377571	0.335631	0.380402	0.301226	0.276302	0.222996	0.319058	0.243222	0.214708	0.252366	0.203913	0.147871	0.172846	0.162922	0.155284	0.16687	0.179252	0.173322	0.139611	0.133631	0.137012		1049	r_lateral_vestibulospinal_tract - [g/ml{SUVbw}]	0.364542	0.488381	0.56141	0.627679	0.785935	0.630947	0.644066	0.629595	0.641167	0.634441	0.591091	0.44574	0.513837	0.436258	0.490598	0.390962	0.402973	0.429403	0.453692
			929	r_lobule_V - [g/ml{SUVbw}]	0.58141	0.278666	0.370224	0.428914	0.208541	0.281691	0.246986	0.277067	0.317336	0.1961	0.245589	0.194036	0.173787	0.151579	0.155232	0.202476	0.177909	0.212712	0.166826	0.167957	0.178924	0.144303	0.18047		1017	r_laterodorsal_tegmental_nucleus - [g/ml{SUVbw}]	0.524826	0.297936	0.321487	0.272638	0.318936	0.328162	0.280528	0.298285	0.267917	0.280678	0.228535	0.218471	0.219908	0.196596	0.181944	0.186884	0.149872	0.161378	0.157735
			1151	r_lobule_VIIIA - [g/ml{SUVbw}]	0.434377	0.391523	0.33002	0.269927	0.395516	0.283669	0.274052	0.267702	0.242507	0.273878	0.30511	0.250991	0.237212	0.206473	0.161676	0.190134	0.175293	0.173397	0.201881	0.167914	0.204798	0.175877	0.197999		1047	r_limitans_nucleus - [g/ml{SUVbw}]	0.481313	0.255933	0.340632	0.173983	0.317215	0.277844	0.26951	0.26856	0.228593	0.209818	0.172037	0.156815	0.154573	0.173912	0.148365	0.127994	0.102775	0.11781	0.114937
			1153	r_lobule_VIIIB - [g/ml{SUVbw}]	0.478617	0.391675	0.389766	0.289518	0.34851	0.257309	0.285753	0.258895	0.203637	0.25468	0.27619	0.261103	0.206	0.182561	0.168068	0.174906	0.155986	0.149217	0.195121	0.156331	0.184805	0.149532	0.183661		571	r_lingual_gyrus - [g/ml{SUVbw}]	0.676471	0.465825	0.488016	0.412704	0.405422	0.398718	0.36923	0.336786	0.348683	0.339295	0.292966	0.293	0.268933	0.24496	0.210956	0.190878	0.179264	0.171544	0.168823
			1019	r_locus_ceruleus - [g/ml{SUVbw}]	0.248196	0.510431	0.270139	0.305558	0.159556	0.185501	0.214347	0.217132	0.211826	0.205498	0.15082	0.136115	0.111415	0.182669	0.117693	0.103345	0.119695	0.131927	0.112244	0.0945567	0.0935205	0.138175	0.0909065		881	r_lingula - [g/ml{SUVbw}]	0.467965	0.27069	0.330849	0.327479	0.275245	0.342683	0.289118	0.279917	0.303063	0.261793	0.210545	0.22541	0.221439	0.202	0.183661	0.180861	0.151016	0.163755	0.153045
			765	r_longitudinal_pontine_fibers - [g/ml{SUVbw}]	0.946115	0.564214	0.745378	0.624453	0.588357	0.575956	0.535146	0.487175	0.464892	0.530433	0.370544	0.384135	0.302076	0.308038	0.307764	0.323724	0.342476	0.387041	0.381084	0.388374	0.404563	0.365518	0.473477		887	r_lobule_II - [g/ml{SUVbw}]	0.435509	0.280033	0.317601	0.297565	0.235372	0.321445	0.27141	0.26239	0.260503	0.239398	0.201455	0.18015	0.186973	0.169187	0.150323	0.142467	0.122871	0.123301	0.117374
			865	r_mammillary_peduncle - [g/ml{SUVbw}]	0.308771	0.341699	0.359831	0.379335	0.336979	0.269314	0.29511	0.289809	0.329388	0.290163	0.25566	0.193932	0.231349	0.221629	0.16564	0.200247	0.171632	0.191826	0.208765	0.190231	0.200998	0.231935	0.232792		889	r_lobule_III - [g/ml{SUVbw}]	0.461463	0.350049	0.333109	0.346936	0.272612	0.330338	0.303146	0.312473	0.285708	0.268057	0.21452	0.202335	0.17888	0.175968	0.1587	0.135001	0.127939	0.122081	0.115838
			861	r_mammillary_princeps_fasciculus - [g/ml{SUVbw}]	0.311329	0.251373	0.278174	0.275192	0.303765	0.221556	0.222357	0.198988	0.238059	0.190415	0.194981	0.149434	0.158134	0.18533	0.140553	0.163306	0.141169	0.145205	0.171223	0.135037	0.146097	0.174497	0.174818		891	r_lobule_IV - [g/ml{SUVbw}]	0.540924	0.314857	0.343406	0.306554	0.355636	0.344623	0.282987	0.299032	0.274187	0.279468	0.206049	0.22298	0.187315	0.184304	0.155491	0.13394	0.136387	0.128074	0.121494
			843	r_mammillotegmental_fasciculus - [g/ml{SUVbw}]	0.340613	0.117059	0.267912	0.180305	0.230745	0.190081	0.155702	0.146104	0.110458	0.130293	0.129189	0.151141	0.0936905	0.112004	0.125437	0.124126	0.108204	0.115333	0.123403	0.0902596	0.107687	0.118603	0.134501		893	r_lobule_V - [g/ml{SUVbw}]	0.571555	0.277156	0.343696	0.283772	0.303604	0.321165	0.265669	0.251301	0.243073	0.222995	0.202823	0.198692	0.168907	0.186467	0.13443	0.13827	0.14085	0.130048	0.128155
			855	r_mammillothalamic_tract_of_the_hypothalamus - [g/ml{SUVbw}]	0.321847	0.220401	0.286966	0.264142	0.290191	0.227779	0.221228	0.200863	0.234428	0.196304	0.194492	0.149527	0.155181	0.174794	0.137172	0.159678	0.136948	0.143166	0.169532	0.132179	0.141587	0.172243	0.175539		1109	r_lobule_VIIIA - [g/ml{SUVbw}]	0.399742	0.317495	0.24819	0.299001	0.333693	0.273177	0.293409	0.287561	0.220987	0.257432	0.21855	0.210976	0.207895	0.195722	0.175097	0.162398	0.173782	0.166432	0.1702
			665	r_medial_accessory_nucleus_of_the_inferior_olive - [g/ml{SUVbw}]	0.350953	0.352396	0.493017	0.489733	0.393968	0.260933	0.341973	0.323879	0.243436	0.26599	0.245548	0.18711	0.206458	0.162763	0.197663	0.205919	0.222923	0.211091	0.23176	0.211199	0.223014	0.275611	0.20099		1111	r_lobule_VIIIB - [g/ml{SUVbw}]	0.339388	0.400268	0.356186	0.355854	0.408237	0.324383	0.345844	0.318676	0.259976	0.299646	0.275435	0.246667	0.244079	0.237301	0.216099	0.194868	0.214206	0.222392	0.210484
			1135	r_medial_amygdalar_nucleus - [g/ml{SUVbw}]	0.523794	0.730577	0.303914	0.526353	0.285587	0.33681	0.324008	0.238657	0.368158	0.276372	0.230661	0.195368	0.230095	0.208028	0.17134	0.181485	0.189465	0.195148	0.196268	0.236494	0.213962	0.188974	0.243534		977	r_locus_ceruleus - [g/ml{SUVbw}]	0.518665	0.303088	0.324526	0.286404	0.313544	0.330226	0.277751	0.301426	0.273121	0.266381	0.229265	0.226497	0.220334	0.204306	0.185017	0.186653	0.152917	0.162171	0.16199
			1011	r_medial_dorsal_nucleus - [g/ml{SUVbw}]	1.01704	0.21783	0.571982	0.239778	0.559138	0.343742	0.395467	0.270555	0.451416	0.215234	0.202838	0.351532	0.147616	0.156184	0.142718	0.142885	0.176008	0.163381	0.223507	0.178241	0.165197	0.184676	0.235128		735	r_longitudinal_pontine_fibers - [g/ml{SUVbw}]	1.25398	1.65164	1.33384	1.42234	1.37583	1.31514	1.30286	1.28255	1.23493	1.2992	1.11201	1.14159	1.06397	1.00431	0.849286	0.79961	0.767548	0.745604	0.712735
			789	r_medial_habenular_nucleus - [g/ml{SUVbw}]	0.916834	0.339581	0.475056	0.286292	0.450455	0.456073	0.412618	0.243517	0.537595	0.213979	0.26242	0.356557	0.160094	0.16419	0.153003	0.145572	0.194102	0.153547	0.238123	0.194338	0.175023	0.174068	0.191723		821	r_mammillary_princeps_fasciculus - [g/ml{SUVbw}]	1.44133	0.937552	0.921141	0.83768	0.900061	0.861842	0.788759	0.794252	0.758455	0.676341	0.646927	0.707362	0.635598	0.537083	0.538552	0.498426	0.47598	0.522486	0.493161
			971	r_medial_lemniscus_of_the_medulla - [g/ml{SUVbw}]	0.279373	0.295935	0.51403	0.405012	0.363664	0.223161	0.272261	0.279606	0.218154	0.259255	0.216963	0.179154	0.204225	0.163174	0.176505	0.187836	0.213196	0.1978	0.220002	0.20559	0.205157	0.253476	0.194849		807	r_mammillotegmental_fasciculus - [g/ml{SUVbw}]	1.18562	0.60939	0.649669	0.535036	0.619379	0.587183	0.49792	0.608096	0.572047	0.468906	0.464918	0.493461	0.438185	0.389964	0.374325	0.342409	0.338395	0.352989	0.366467
			773	r_medial_lemniscus_of_the_midbrain - [g/ml{SUVbw}]	0.472513	0.370153	0.354071	0.234649	0.272455	0.225852	0.186272	0.249817	0.166473	0.216666	0.133356	0.186288	0.170562	0.169416	0.134957	0.139862	0.148398	0.143462	0.181374	0.164841	0.1891	0.176668	0.215154		815	r_mammillothalamic_tract_of_the_hypothalamus - [g/ml{SUVbw}]	1.40918	0.870071	0.871935	0.803189	0.846799	0.812153	0.735837	0.786636	0.736978	0.649419	0.618596	0.679276	0.598892	0.513488	0.515327	0.478058	0.462811	0.507233	0.482881
			761	r_medial_lemniscus_of_the_pons - [g/ml{SUVbw}]	0.339591	0.431681	0.437244	0.364768	0.367517	0.319523	0.250315	0.246074	0.322212	0.233591	0.299585	0.184383	0.190551	0.172762	0.205774	0.204349	0.207814	0.253531	0.211371	0.242153	0.271099	0.264039	0.26028		825	r_mammillothalamic_tract_of_the_thalamus - [g/ml{SUVbw}]	0.561157	0.331085	0.319565	0.230945	0.371761	0.329961	0.333018	0.259124	0.325329	0.250092	0.26229	0.230156	0.247246	0.156298	0.185738	0.147798	0.136324	0.12906	0.161999
			671	r_medial_longitudinal_fasciculus_of_the_medulla - [g/ml{SUVbw}]	0.385806	0.301159	0.644418	0.439099	0.412324	0.236128	0.265865	0.331614	0.193728	0.268616	0.196599	0.194651	0.220621	0.17164	0.171687	0.215663	0.219085	0.187051	0.23406	0.214182	0.220866	0.235949	0.222527		643	r_medial_accessory_nucleus_of_the_inferior_olive - [g/ml{SUVbw}]	0.301127	0.353173	0.523247	0.600242	0.714555	0.635017	0.650416	0.609018	0.55995	0.632367	0.553846	0.413379	0.463049	0.426807	0.442174	0.390747	0.403009	0.424057	0.42605
			719	r_medial_longitudinal_fasciculus_of_the_pons - [g/ml{SUVbw}]	0.172618	0.357978	0.197248	0.188677	0.163787	0.130229	0.186119	0.191646	0.170291	0.165964	0.121343	0.119596	0.0871489	0.124834	0.105242	0.0938341	0.0989705	0.105649	0.0952728	0.0934877	0.109393	0.123642	0.0807972		1093	r_medial_amygdalar_nucleus - [g/ml{SUVbw}]	0.974117	0.756343	0.766274	0.750832	0.532447	0.684707	0.597815	0.608767	0.546672	0.584862	0.524236	0.537572	0.490703	0.415552	0.401808	0.374317	0.376685	0.358736	0.376063
			851	r_medial_mammillary_nucleus - [g/ml{SUVbw}]	0.338948	0.345359	0.320172	0.353164	0.345027	0.263784	0.285435	0.264349	0.31907	0.248765	0.243594	0.180531	0.217517	0.224308	0.166983	0.191844	0.172155	0.180978	0.202797	0.183185	0.193421	0.224042	0.218144		971	r_medial_dorsal_nucleus - [g/ml{SUVbw}]	0.48625	0.334577	0.337933	0.266587	0.333543	0.291884	0.304826	0.33436	0.313538	0.254077	0.23396	0.196372	0.16331	0.193187	0.164044	0.12905	0.128312	0.120955	0.114597
			913	r_medial_orbital_gyrus - [g/ml{SUVbw}]	0.462921	0.333721	0.36724	0.410001	0.304115	0.313754	0.255982	0.272498	0.294683	0.29231	0.213917	0.226749	0.221086	0.181468	0.195933	0.21678	0.214253	0.236802	0.27921	0.258576	0.299976	0.30976	0.290138		755	r_medial_habenular_nucleus - [g/ml{SUVbw}]	0.458992	0.252935	0.303076	0.234159	0.338707	0.276944	0.308232	0.313427	0.228264	0.225056	0.201589	0.173265	0.140327	0.17211	0.151487	0.120084	0.106682	0.114836	0.110489
			977	r_medial_parabrachial_nucleus - [g/ml{SUVbw}]	0.264656	0.629998	0.259478	0.343337	0.14185	0.21253	0.224179	0.23164	0.18966	0.231736	0.157804	0.130351	0.108045	0.202736	0.122507	0.109709	0.123459	0.132206	0.112961	0.104979	0.0937461	0.145174	0.108068		935	r_medial_lemniscus_of_the_medulla - [g/ml{SUVbw}]	0.360448	0.40632	0.578876	0.622584	0.740317	0.707805	0.699958	0.648394	0.581065	0.636114	0.598014	0.468379	0.48017	0.475045	0.455378	0.391695	0.430728	0.43678	0.443768
			735	r_medial_pulvinar_nucleus - [g/ml{SUVbw}]	0.417212	0.276034	0.271444	0.2474	0.329275	0.263356	0.313613	0.252621	0.285158	0.205806	0.232275	0.208165	0.146562	0.179841	0.144647	0.138052	0.170933	0.1497	0.177535	0.175638	0.139125	0.159687	0.164715		743	r_medial_lemniscus_of_the_midbrain - [g/ml{SUVbw}]	1.33985	1.14853	1.14511	0.993343	1.06879	0.973963	0.922359	0.945719	0.905018	0.91988	0.791368	0.852317	0.804165	0.703264	0.623632	0.558513	0.558284	0.58922	0.55733
			1031	r_medial_septal_nucleus - [g/ml{SUVbw}]	0.271669	0.0725586	0.243538	0.0806994	0.252885	0.220178	0.154642	0.241335	0.14067	0.166301	0.129311	0.113861	0.0987856	0.11506	0.104635	0.143048	0.101876	0.126145	0.116551	0.107877	0.11161	0.127752	0.0969923		731	r_medial_lemniscus_of_the_pons - [g/ml{SUVbw}]	0.51098	0.733822	0.675863	0.874493	0.72246	0.809554	0.757098	0.818622	0.783933	0.827115	0.720088	0.629954	0.621762	0.612535	0.522471	0.55636	0.485556	0.486789	0.499033
			659	r_medial_vestibular_nucleus - [g/ml{SUVbw}]	0.232416	0.663348	0.173686	0.373989	0.155669	0.235229	0.241057	0.237883	0.135504	0.170567	0.122731	0.138346	0.0794725	0.0971369	0.114522	0.111842	0.103308	0.107351	0.111869	0.11307	0.117575	0.140975	0.105124		649	r_medial_longitudinal_fasciculus_of_the_medulla - [g/ml{SUVbw}]	0.355066	0.463403	0.597931	0.659711	0.82582	0.781105	0.745057	0.675626	0.635945	0.659021	0.644842	0.51153	0.516357	0.508641	0.498633	0.391333	0.459886	0.448495	0.46853
			621	r_medullary_white_matter_-_not_otheriwise_specified - [g/ml{SUVbw}]	0.88003	0.60968	0.642621	0.57366	0.633597	0.468613	0.474229	0.519928	0.360852	0.410217	0.313364	0.334737	0.359048	0.260388	0.281244	0.329328	0.317115	0.299352	0.348828	0.304201	0.319905	0.292736	0.356665		695	r_medial_longitudinal_fasciculus_of_the_pons - [g/ml{SUVbw}]	0.650363	0.390555	0.550715	0.505487	0.543858	0.525399	0.482862	0.496865	0.489191	0.407262	0.397003	0.420701	0.376233	0.350794	0.329517	0.310808	0.275036	0.308926	0.293081
			1067	r_mesencephalic_nucleus_of_the_trigeminal_nerve - [g/ml{SUVbw}]	0.403502	0.326287	0.323447	0.359403	0.217552	0.239961	0.251172	0.21155	0.21151	0.277581	0.179332	0.154682	0.147627	0.168171	0.12549	0.119357	0.133787	0.161757	0.133137	0.108099	0.0956165	0.144494	0.110257		811	r_medial_mammillary_nucleus - [g/ml{SUVbw}]	1.55134	1.14223	1.0762	1.03125	1.04494	1.01788	0.959633	0.948062	0.908637	0.817794	0.77751	0.849463	0.759699	0.648586	0.641788	0.599833	0.574229	0.619084	0.592654
			697	r_mesencephalic_tract_of_the_trigeminal_nerve - [g/ml{SUVbw}]	0.289941	0.446241	0.282255	0.324968	0.167147	0.205705	0.221269	0.206006	0.202112	0.224744	0.158203	0.137137	0.124509	0.183313	0.118971	0.106631	0.125701	0.144262	0.115353	0.0986258	0.092889	0.141046	0.0979511		877	r_medial_orbital_gyrus - [g/ml{SUVbw}]	0.552003	0.389381	0.450721	0.439945	0.414947	0.405632	0.391193	0.343154	0.38196	0.370957	0.334834	0.322208	0.311504	0.282844	0.278986	0.265421	0.265926	0.315376	0.330088
			1005	r_midbrain - [g/ml{SUVbw}]	0.250524	0.328717	0.313023	0.19825	0.199781	0.171079	0.166181	0.213493	0.114665	0.138165	0.105956	0.160712	0.127212	0.135891	0.10891	0.107132	0.121654	0.105091	0.135258	0.10878	0.144515	0.12795	0.138339		941	r_medial_parabrachial_nucleus - [g/ml{SUVbw}]	0.508277	0.2975	0.315206	0.288623	0.298156	0.319883	0.269472	0.287154	0.261544	0.234367	0.215511	0.211789	0.206651	0.197119	0.172854	0.172306	0.143567	0.149767	0.152396
			763	r_middle_cerebellar_peduncle - [g/ml{SUVbw}]	0.745842	0.388621	0.528858	0.585308	0.461306	0.456772	0.436108	0.336227	0.336626	0.475375	0.294628	0.288885	0.265633	0.249189	0.243725	0.260245	0.254123	0.304301	0.279201	0.276037	0.295106	0.258429	0.3416		709	r_medial_pulvinar_nucleus - [g/ml{SUVbw}]	0.518275	0.299199	0.435136	0.251084	0.316622	0.333337	0.279613	0.31089	0.241862	0.261694	0.205961	0.209037	0.201512	0.18527	0.164263	0.142219	0.124343	0.131312	0.123608
		Frontal Cortex	901	r_middle_frontal_gyrus - [g/ml{SUVbw}]	0.298181	0.235572	0.241835	0.276637	0.255763	0.256358	0.211438	0.229354	0.210515	0.203679	0.201694	0.203022	0.209818	0.186297	0.198471	0.205007	0.202026	0.226587	0.225744	0.246712	0.239883	0.275598	0.258426		865	r_middle_frontal_gyrus - [g/ml{SUVbw}]	0.341859	0.301511	0.272688	0.293641	0.261722	0.281274	0.273967	0.290113	0.241508	0.238149	0.232811	0.219756	0.205598	0.199272	0.187541	0.164086	0.16825	0.178538	0.176275
			683	r_middle_temporal_gyrus - [g/ml{SUVbw}]	0.334888	0.315014	0.310657	0.341753	0.268741	0.248449	0.226541	0.243181	0.222127	0.203796	0.182667	0.178377	0.170298	0.160819	0.152691	0.166027	0.175551	0.177643	0.176023	0.187727	0.189341	0.203697	0.194918		985	r_medial_septal_nucleus - [g/ml{SUVbw}]	0.538418	0.565754	0.513138	0.332961	0.648169	0.448965	0.428283	0.415294	0.37245	0.375201	0.345667	0.362989	0.330013	0.310502	0.285239	0.25853	0.249361	0.245924	0.272566
			1105	r_molecular_layer_of_the_dentate_gyrus - [g/ml{SUVbw}]	0.377113	0.294089	0.226592	0.223441	0.223919	0.230166	0.235018	0.2117	0.197498	0.157794	0.182754	0.140154	0.132468	0.12958	0.132226	0.119713	0.122129	0.122812	0.139616	0.134063	0.147586	0.134943	0.150351		637	r_medial_vestibular_nucleus - [g/ml{SUVbw}]	0.529827	0.419341	0.453054	0.38665	0.455277	0.407355	0.431925	0.380772	0.406165	0.308961	0.328856	0.315701	0.301688	0.296017	0.264978	0.234727	0.226033	0.237142	0.243181
		Hippocampus	1103	r_molecular_layer_of_the_hippocampus - [g/ml{SUVbw}]	0.388964	0.347853	0.258479	0.296529	0.270974	0.277841	0.273688	0.225238	0.247433	0.185081	0.211356	0.172327	0.163405	0.163472	0.159767	0.140511	0.149776	0.151792	0.170082	0.157607	0.178448	0.164894	0.190475		1061	r_molecular_layer_of_the_hippocampus - [g/ml{SUVbw}]	0.563887	0.539281	0.566335	0.584637	0.511644	0.530514	0.519798	0.514666	0.50755	0.499314	0.436583	0.423987	0.41097	0.389693	0.347623	0.331437	0.333446	0.343074	0.359075
			1025	r_motor_nucleus_of_the_trigeminal_nerve - [g/ml{SUVbw}]	0.36324	0.436065	0.282215	0.264803	0.161634	0.23663	0.225923	0.183826	0.195388	0.258476	0.161054	0.12614	0.157007	0.166958	0.122156	0.11439	0.127001	0.155655	0.0937555	0.124818	0.109687	0.143112	0.135112		1021	r_mesencephalic_nucleus_of_the_trigeminal_nerve - [g/ml{SUVbw}]	0.516926	0.274483	0.312623	0.257166	0.295644	0.309857	0.265525	0.270984	0.238368	0.237627	0.213053	0.190064	0.194636	0.179602	0.157756	0.163321	0.132894	0.139062	0.135612
			695	r_motor_root_of_the_trigeminal_nerve - [g/ml{SUVbw}]	0.280677	0.823524	0.238027	0.344287	0.13103	0.221251	0.217719	0.22225	0.178124	0.205722	0.156096	0.122155	0.0890211	0.204039	0.119651	0.108719	0.115826	0.119243	0.110222	0.108966	0.0937059	0.152636	0.105279		673	r_mesencephalic_tract_of_the_trigeminal_nerve - [g/ml{SUVbw}]	0.512286	0.290244	0.316864	0.276221	0.299447	0.318508	0.267932	0.285813	0.256333	0.244054	0.216849	0.208329	0.205422	0.193652	0.171059	0.173537	0.142062	0.148951	0.150016
			919	r_nodulus - [g/ml{SUVbw}]	0.231029	0.300633	0.189769	0.250427	0.157714	0.233111	0.217524	0.204486	0.106461	0.166425	0.113661	0.132749	0.113138	0.0716347	0.121641	0.104041	0.106951	0.102355	0.0919668	0.112003	0.12908	0.115453	0.109919		967	r_midbrain - [g/ml{SUVbw}]	1.44436	0.869024	1.02598	0.932111	0.96084	0.81429	0.796747	0.851728	0.783834	0.745049	0.694745	0.756117	0.686763	0.613292	0.559973	0.483891	0.51784	0.53683	0.532389
		Nucleus Accumbens	895	r_nucleus_accumbens - [g/ml{SUVbw}]	0.503263	0.204595	0.392696	0.238391	0.50428	0.297203	0.172252	0.280419	0.215595	0.167438	0.16123	0.208882	0.145585	0.154589	0.146557	0.179988	0.161558	0.19126	0.179321	0.205808	0.199895	0.203904	0.192863		859	r_nucleus_accumbens - [g/ml{SUVbw}]	0.773278	0.574296	0.537858	0.550723	0.588676	0.552137	0.573685	0.469099	0.464781	0.49885	0.503054	0.489411	0.417739	0.444695	0.400806	0.412694	0.420252	0.427483	0.461824
			645	r_nucleus_ambiguus - [g/ml{SUVbw}]	0.524923	0.526123	0.544458	0.494977	0.506993	0.365957	0.372081	0.455985	0.348208	0.275328	0.270093	0.244213	0.232295	0.16922	0.194362	0.281596	0.225323	0.232274	0.273227	0.224547	0.267225	0.261138	0.253699	487	1015	r_medial_reticular_nucleus - [g/ml{SUVbw}]	0.329887	0.461537	0.580223	0.653356	0.815932	0.743113	0.710823	0.661401	0.639513	0.6558	0.635065	0.486184	0.526995	0.489241	0.50339	0.394867	0.457839	0.446345	0.468809
			1165	r_nucleus_intercalatus - [g/ml{SUVbw}]	0.176387	0.189278	0.344389	0.317403	0.17856	0.184684	0.192479	0.212286	0.113572	0.213614	0.101099	0.134152	0.109913	0.0856422	0.121381	0.128549	0.129012	0.128924	0.115002	0.116158	0.154396	0.143307	0.138501		659	r_middle_temporal_gyrus - [g/ml{SUVbw}]	0.470479	0.359247	0.35675	0.374011	0.371128	0.36295	0.340518	0.349692	0.324918	0.331029	0.300743	0.27947	0.267078	0.247142	0.239351	0.215934	0.216273	0.212644	0.229325
			869	r_nucleus_of_stria_terminalis - [g/ml{SUVbw}]	0.848366	0.17048	0.281463	0.198886	0.307338	0.239209	0.227124	0.201679	0.212852	0.226436	0.187097	0.101312	0.126769	0.145394	0.121222	0.114434	0.0917835	0.119463	0.131899	0.108515	0.107657	0.108909	0.10472		1063	r_molecular_layer_of_the_dentate_gyrus - [g/ml{SUVbw}]	0.609694	0.50932	0.541197	0.546926	0.470451	0.488891	0.498757	0.471468	0.465814	0.451654	0.409639	0.39812	0.373739	0.360829	0.317568	0.306649	0.301524	0.317283	0.330304
			1049	r_nucleus_of_the_bulbar_accessory_nerve - [g/ml{SUVbw}]	0.871629	0.48348	0.522366	0.493168	0.532393	0.41283	0.387883	0.413703	0.324845	0.327156	0.302181	0.307095	0.34784	0.243794	0.283924	0.303638	0.301032	0.298714	0.335944	0.278001	0.313183	0.30161	0.357538	490	601	r_medullary_white_matter_-_not_otheriwise_specified - [g/ml{SUVbw}]	0.294777	0.476505	0.526687	0.650892	0.727842	0.72154	0.677045	0.61837	0.632953	0.641272	0.588657	0.492729	0.522099	0.470189	0.495854	0.40772	0.457297	0.455425	0.472522
			1129	r_nucleus_of_the_diagonal_band - [g/ml{SUVbw}]	0.422349	0.175173	0.299146	0.202897	0.466157	0.302165	0.183301	0.306693	0.206341	0.198436	0.206863	0.204772	0.134655	0.133578	0.148268	0.194888	0.157356	0.190465	0.192174	0.201553	0.201732	0.204258	0.184441		883	r_nodulus - [g/ml{SUVbw}]	0.500039	0.454639	0.532916	0.405248	0.421812	0.42316	0.461804	0.382552	0.432497	0.327756	0.339387	0.312731	0.313506	0.302295	0.261836	0.246343	0.240627	0.237113	0.238473
			983	r_nucleus_of_the_posterior_commissure - [g/ml{SUVbw}]	0.651739	0.277771	0.329062	0.295735	0.318336	0.451103	0.349485	0.215342	0.436856	0.162298	0.230733	0.260555	0.158308	0.14662	0.137181	0.131162	0.167889	0.128528	0.201274	0.14348	0.159313	0.145187	0.139273	494	733	r_middle_cerebellar_peduncle - [g/ml{SUVbw}]	1.08694	1.45637	1.02569	1.0315	0.967438	1.02664	1.02287	1.01423	0.984221	0.919156	0.858098	0.769559	0.74338	0.765539	0.640644	0.592211	0.582048	0.55895	0.569339
			1001	r_nucleus_prepositus - [g/ml{SUVbw}]	0.151535	0.452234	0.161414	0.26949	0.144904	0.158203	0.220494	0.243065	0.106948	0.185896	0.124329	0.133445	0.0713629	0.099841	0.110121	0.109515	0.106827	0.103803	0.0971537	0.105415	0.129128	0.137896	0.0977393		1123	r_nucleus_intercalatus - [g/ml{SUVbw}]	0.581322	0.55911	0.669098	0.592349	0.787178	0.65938	0.68498	0.632179	0.634908	0.544246	0.601721	0.51252	0.484822	0.482826	0.447804	0.376476	0.380598	0.397105	0.410136
			587	r_occipital_gyrus_macaque - [g/ml{SUVbw}]	0.280072	0.291705	0.218294	0.216958	0.242658	0.20421	0.178985	0.209831	0.201125	0.173621	0.180394	0.151803	0.153514	0.139179	0.145194	0.142537	0.153132	0.158949	0.165387	0.172438	0.166559	0.182004	0.170869		829	r_nucleus_of_stria_terminalis - [g/ml{SUVbw}]	0.686413	0.402948	0.449072	0.300572	0.501003	0.39579	0.382824	0.310759	0.353171	0.30559	0.327138	0.287609	0.315066	0.22553	0.246782	0.208661	0.191537	0.205228	0.225428
			673	r_occipital_horn_of_the_lateral_ventricle - [g/ml{SUVbw}]	0.267073	0.11726	0.190562	0.0883528	0.14717	0.137194	0.156786	0.119735	0.0969213	0.120446	0.111961	0.099424	0.118832	0.110657	0.088806	0.10317	0.0991788	0.07716	0.080039	0.0970315	0.0881088	0.0934883	0.0934687		1087	r_nucleus_of_the_diagonal_band - [g/ml{SUVbw}]	0.835657	0.74653	0.724158	0.573777	0.819509	0.668776	0.655165	0.542996	0.557568	0.610699	0.569498	0.598635	0.523523	0.511817	0.466197	0.470456	0.457632	0.446818	0.47654
			589	r_occipital_white_matter - [g/ml{SUVbw}]	0.317571	0.297113	0.245727	0.267832	0.220034	0.198485	0.20538	0.199387	0.200449	0.18747	0.159316	0.15599	0.149785	0.132294	0.135129	0.127581	0.13943	0.131826	0.138479	0.154686	0.139352	0.153868	0.148459		1041	r_nucleus_of_the_optic_tract - [g/ml{SUVbw}]	0.515259	0.276699	0.358266	0.16665	0.329427	0.287232	0.264586	0.26766	0.229298	0.213538	0.169845	0.158292	0.159101	0.175134	0.152352	0.132971	0.107641	0.116782	0.116915
			817	r_oculomotor_nerve_fibers - [g/ml{SUVbw}]	0.417026	0.244242	0.308982	0.182582	0.223352	0.174741	0.152839	0.195871	0.133633	0.176234	0.117254	0.157142	0.142616	0.138381	0.107707	0.123486	0.121006	0.115095	0.13406	0.118589	0.151581	0.147342	0.162213		945	r_nucleus_of_the_posterior_commissure - [g/ml{SUVbw}]	0.42877	0.230941	0.275651	0.224975	0.336396	0.263088	0.308156	0.290676	0.197785	0.207769	0.191851	0.155779	0.137487	0.154454	0.147536	0.119789	0.100552	0.114385	0.112278
			911	r_olfactory_tubercle - [g/ml{SUVbw}]	0.616432	0.305762	0.299293	0.386644	0.429636	0.323781	0.280952	0.232912	0.271726	0.199024	0.191926	0.261916	0.215598	0.194037	0.202642	0.228861	0.214231	0.287815	0.231281	0.323447	0.243672	0.291243	0.285646		963	r_nucleus_prepositus - [g/ml{SUVbw}]	0.596364	0.421575	0.569518	0.466084	0.538995	0.494759	0.502098	0.471714	0.495798	0.380549	0.394173	0.401388	0.367773	0.364563	0.323209	0.292867	0.274562	0.294564	0.295684
			1059	r_olivocerebellar_tract - [g/ml{SUVbw}]	0.478499	0.353063	0.466062	0.451589	0.535897	0.307589	0.360987	0.414209	0.379684	0.216457	0.262643	0.199758	0.179634	0.147996	0.177194	0.243596	0.18435	0.216606	0.218196	0.215724	0.280243	0.256303	0.221417		567	r_occipital_gyrus_macaque - [g/ml{SUVbw}]	0.936236	0.645099	0.614198	0.580224	0.584652	0.538058	0.500009	0.489832	0.468427	0.438741	0.413044	0.389752	0.359749	0.335215	0.292855	0.263417	0.26437	0.253161	0.253121
			797	r_optic_tract - [g/ml{SUVbw}]	0.513004	0.638979	0.291745	0.620792	0.340102	0.360367	0.342477	0.245644	0.389323	0.287411	0.238844	0.20752	0.243343	0.19912	0.173978	0.183069	0.185798	0.219347	0.198646	0.242882	0.19546	0.199767	0.227871		651	r_occipital_horn_of_the_lateral_ventricle - [g/ml{SUVbw}]	0.777323	0.381812	0.418334	0.386519	0.379362	0.390861	0.355569	0.349867	0.30337	0.348687	0.314188	0.271704	0.260035	0.22508	0.199857	0.191593	0.179984	0.157032	0.158338
			813	r_oral_pontine_reticular_nucleus - [g/ml{SUVbw}]	0.260217	0.424774	0.290912	0.270078	0.182142	0.190608	0.209325	0.182383	0.199576	0.172011	0.156453	0.127156	0.129347	0.164894	0.129213	0.110944	0.126463	0.14928	0.122385	0.119794	0.13176	0.156854	0.113325		569	r_occipital_white_matter - [g/ml{SUVbw}]	0.63875	0.420326	0.40723	0.375374	0.373667	0.356917	0.338567	0.318731	0.304068	0.299349	0.25969	0.270118	0.238932	0.21262	0.187397	0.170077	0.168598	0.165221	0.160621
			811	r_oral_pulvinar_nucleus - [g/ml{SUVbw}]	0.404967	0.300522	0.314852	0.332943	0.421645	0.232969	0.346469	0.220254	0.242289	0.232539	0.201643	0.203198	0.148976	0.20398	0.145499	0.14126	0.162625	0.143949	0.208408	0.153094	0.148963	0.182931	0.166081		785	r_oculomotor_nerve_fibers - [g/ml{SUVbw}]	1.65219	0.958319	1.07907	1.01458	0.962193	0.912074	0.863763	0.99749	0.909696	0.856427	0.766461	0.866868	0.748972	0.680535	0.617278	0.554661	0.597733	0.612606	0.587643
			985	r_paracentral_nucleus - [g/ml{SUVbw}]	0.294486	0.061976	0.226078	0.233995	0.243083	0.21069	0.236734	0.166749	0.182519	0.141622	0.136421	0.142664	0.0984635	0.154797	0.118217	0.125507	0.0964146	0.115153	0.135538	0.12132	0.0996056	0.115714	0.158908		875	r_olfactory_tubercle - [g/ml{SUVbw}]	0.885766	0.790858	0.657949	0.709462	0.542977	0.690469	0.677381	0.547847	0.598186	0.539756	0.554552	0.58419	0.527389	0.517998	0.45459	0.424359	0.46704	0.50706	0.499272
			1007	r_parafascicular_nucleus - [g/ml{SUVbw}]	0.894584	0.0943164	0.443106	0.27147	0.341659	0.345433	0.264313	0.206389	0.303252	0.113287	0.194082	0.268161	0.128889	0.133804	0.130513	0.122152	0.134288	0.143488	0.162271	0.11693	0.137024	0.133731	0.165334		1013	r_olivocerebellar_tract - [g/ml{SUVbw}]	0.528094	0.481159	0.468186	0.462775	0.523767	0.430208	0.446644	0.452123	0.419285	0.338773	0.406924	0.329761	0.337653	0.317453	0.307732	0.26045	0.272918	0.282045	0.276085
			1099	r_paralaminar_nucleus_of_the_amygdala - [g/ml{SUVbw}]	0.839466	0.81095	0.554806	0.523224	0.359114	0.416242	0.462096	0.410413	0.460298	0.360078	0.431925	0.340476	0.35272	0.319761	0.351815	0.334802	0.335091	0.343579	0.39813	0.406303	0.428299	0.445971	0.442454		765	r_optic_tract - [g/ml{SUVbw}]	1.07532	0.898462	0.911627	0.851533	0.718867	0.773474	0.748235	0.704773	0.633098	0.663156	0.636538	0.647016	0.608762	0.532976	0.499922	0.477021	0.462619	0.469773	0.47547
			1095	r_paranigral_nucleus - [g/ml{SUVbw}]	0.355366	0.314736	0.288265	0.195819	0.227896	0.159021	0.149018	0.211316	0.112461	0.157969	0.104965	0.155269	0.15551	0.138751	0.111831	0.103031	0.122975	0.111621	0.145715	0.126631	0.1571	0.137175	0.153726		781	r_oral_pontine_reticular_nucleus - [g/ml{SUVbw}]	0.514743	0.404257	0.401229	0.413251	0.443291	0.475353	0.407157	0.455169	0.40608	0.429149	0.36656	0.351516	0.320475	0.316228	0.287024	0.285586	0.245878	0.263626	0.258676
			1107	r_parasubicular_area - [g/ml{SUVbw}]	0.489324	0.345593	0.55996	0.409255	0.451664	0.378573	0.38937	0.299593	0.28188	0.378629	0.269505	0.251187	0.212196	0.246019	0.214068	0.217872	0.212875	0.243325	0.230629	0.23029	0.253659	0.23001	0.278456		779	r_oral_pulvinar_nucleus - [g/ml{SUVbw}]	0.41755	0.28769	0.358571	0.194506	0.275723	0.284741	0.2629	0.263226	0.256043	0.253103	0.187385	0.174125	0.172718	0.175574	0.162715	0.133785	0.118295	0.122312	0.118552
			849	r_pars_compacta - [g/ml{SUVbw}]	0.25976	0.17554	0.353071	0.263903	0.28535	0.208118	0.197818	0.225521	0.259308	0.25372	0.186215	0.144515	0.165348	0.149084	0.118528	0.152651	0.124238	0.135175	0.153143	0.129778	0.141464	0.164698	0.174172		947	r_paracentral_nucleus - [g/ml{SUVbw}]	0.621172	0.321963	0.341169	0.257836	0.34844	0.307396	0.309802	0.275832	0.319431	0.263393	0.253425	0.219679	0.198654	0.159594	0.174098	0.137906	0.135112	0.116227	0.134223
			795	r_pars_reticulata - [g/ml{SUVbw}]	0.425091	0.22396	0.376867	0.247145	0.300094	0.183416	0.188033	0.223595	0.19009	0.241023	0.147307	0.152493	0.17902	0.15357	0.112922	0.151019	0.132655	0.143757	0.152234	0.148065	0.176543	0.172163	0.200598		969	r_parafascicular_nucleus - [g/ml{SUVbw}]	0.498483	0.259819	0.274551	0.235708	0.29803	0.272562	0.316648	0.272791	0.296679	0.21892	0.225041	0.178002	0.149766	0.1679	0.156522	0.120804	0.120133	0.110742	0.111701
			1009	r_parvicellular_part_of_the_ventral_posteromedial_nucleus - [g/ml{SUVbw}]	0.745771	0.243518	0.490787	0.317095	0.435788	0.177029	0.315347	0.161999	0.255747	0.245442	0.11662	0.157336	0.215658	0.176371	0.0925416	0.146069	0.126106	0.120664	0.133008	0.109682	0.133088	0.146631	0.12501		1057	r_paralaminar_nucleus_of_the_amygdala - [g/ml{SUVbw}]	0.638968	0.935056	0.912634	0.735976	0.84001	0.776276	0.819294	0.738796	0.738734	0.717304	0.658231	0.622872	0.653134	0.581736	0.520879	0.502858	0.488686	0.49756	0.529039
			1173	r_parvicellular_reticular_nucleus - [g/ml{SUVbw}]	0.218748	0.50157	0.265996	0.351993	0.172873	0.235625	0.22344	0.220799	0.160652	0.206543	0.137429	0.135175	0.0894753	0.136733	0.115859	0.122544	0.112122	0.12743	0.118549	0.1155	0.114091	0.148618	0.121624		1053	r_paranigral_nucleus - [g/ml{SUVbw}]	1.37932	1.09345	1.18772	1.04035	1.14529	0.946189	0.938301	0.941399	0.897357	0.929971	0.801289	0.871658	0.808689	0.689677	0.630472	0.546629	0.584019	0.609383	0.587938
			1073	r_peduncle_of_the_flocculus - [g/ml{SUVbw}]	0.524275	0.197124	0.34256	0.329523	0.308871	0.269399	0.252524	0.234697	0.207928	0.248096	0.187787	0.184803	0.114797	0.125657	0.147297	0.150719	0.116168	0.150062	0.160168	0.167845	0.15052	0.130328	0.136265		1065	r_parasubicular_area - [g/ml{SUVbw}]	0.919464	0.967613	0.810814	0.834174	0.713525	0.780932	0.755321	0.760535	0.806961	0.729668	0.671119	0.590301	0.576452	0.550127	0.493128	0.461488	0.448347	0.455438	0.469062
			1071	r_peduncle_of_the_paraflocculus - [g/ml{SUVbw}]	0.548328	0.154609	0.314662	0.308664	0.271086	0.219583	0.205468	0.22494	0.159647	0.181728	0.185173	0.163312	0.117041	0.136307	0.143084	0.136416	0.117947	0.143399	0.15806	0.163405	0.146446	0.125343	0.132924		761	r_pars_reticulata - [g/ml{SUVbw}]	1.68338	1.19641	1.17086	1.2005	1.01426	1.04134	0.935522	1.06999	0.987578	1.05551	0.868568	0.956177	0.839911	0.743397	0.674572	0.618551	0.63932	0.663069	0.622085
			815	r_pedunculopontine_tegmental_nucleus - [g/ml{SUVbw}]	0.304087	0.383649	0.247069	0.304811	0.153802	0.214919	0.212961	0.186587	0.180826	0.219626	0.146074	0.115326	0.147238	0.185862	0.11422	0.103632	0.129909	0.152916	0.106813	0.10671	0.0920322	0.13788	0.110784		1131	r_parvicellular_reticular_nucleus - [g/ml{SUVbw}]	0.536195	0.340557	0.311455	0.309737	0.331674	0.329804	0.281941	0.303808	0.276767	0.23276	0.23083	0.228834	0.219696	0.212993	0.182904	0.177571	0.155547	0.16166	0.16627
			897	r_periamygdalar_area - [g/ml{SUVbw}]	0.978046	1.24535	0.379917	0.91692	0.491963	0.553014	0.597293	0.501017	0.538586	0.467921	0.466666	0.370364	0.536522	0.49257	0.439738	0.402337	0.462637	0.44457	0.446335	0.496584	0.479516	0.501151	0.486099		1027	r_peduncle_of_the_flocculus - [g/ml{SUVbw}]	1.06696	0.838599	0.741867	0.84139	0.644969	0.835865	0.62676	0.535196	0.663161	0.553072	0.582151	0.564558	0.49482	0.441528	0.455101	0.365235	0.364747	0.407917	0.380835
			717	r_pineal_body - [g/ml{SUVbw}]	0.469918	0.535725	0.438552	0.228657	0.439705	0.408895	0.325578	0.196633	0.240863	0.211692	0.212805	0.214168	0.168014	0.157631	0.158044	0.18357	0.187132	0.140495	0.205323	0.181451	0.174337	0.158649	0.159554		1025	r_peduncle_of_the_paraflocculus - [g/ml{SUVbw}]	0.985973	0.732844	0.717164	0.760431	0.67752	0.778682	0.626519	0.52952	0.627035	0.569393	0.566572	0.542074	0.440593	0.439904	0.407368	0.348695	0.353272	0.365803	0.359
			1089	r_pineal_stalk - [g/ml{SUVbw}]	0.597981	0.427266	0.340079	0.290084	0.409476	0.47976	0.406261	0.20262	0.401681	0.207909	0.251626	0.279968	0.156016	0.163489	0.155599	0.163075	0.189887	0.137645	0.243385	0.19437	0.175669	0.175996	0.162897		783	r_pedunculopontine_tegmental_nucleus - [g/ml{SUVbw}]	0.539004	0.337063	0.329257	0.259957	0.315688	0.316962	0.261605	0.271501	0.243779	0.23038	0.217647	0.191666	0.199661	0.193566	0.16254	0.17398	0.141886	0.146637	0.141593
			781	r_pontine_nuclei - [g/ml{SUVbw}]	0.767138	0.424874	0.550512	0.559209	0.471114	0.401832	0.365357	0.348492	0.3636	0.355078	0.319365	0.269989	0.24575	0.235078	0.243739	0.255712	0.277107	0.310088	0.285393	0.294049	0.33673	0.293333	0.35035		861	r_periamygdalar_area - [g/ml{SUVbw}]	0.639487	1.23482	0.900078	0.842814	0.868988	0.871307	0.814488	0.87876	0.76578	0.69271	0.760942	0.765881	0.759705	0.674872	0.604302	0.564027	0.579872	0.564614	0.592199
			771	r_postcentral_gyrus - [g/ml{SUVbw}]	0.22001	0.203547	0.255668	0.328696	0.208436	0.239358	0.263753	0.214555	0.200684	0.183965	0.192832	0.177359	0.163094	0.191873	0.178853	0.182562	0.194424	0.202208	0.208474	0.210152	0.218981	0.21597	0.233548		693	r_pineal_body - [g/ml{SUVbw}]	0.517648	0.311288	0.35877	0.288086	0.399822	0.287221	0.330043	0.317384	0.245621	0.284775	0.239043	0.203009	0.177026	0.153959	0.17312	0.149223	0.128852	0.120528	0.136143
			867	r_postcommissural_fornix - [g/ml{SUVbw}]	0.262054	0.243422	0.259456	0.316135	0.312781	0.257056	0.275724	0.23047	0.252234	0.204464	0.20468	0.126712	0.164701	0.179765	0.129922	0.14512	0.122729	0.143994	0.152794	0.127797	0.121749	0.149141	0.136884		1045	r_pineal_stalk - [g/ml{SUVbw}]	0.436774	0.225852	0.290726	0.223017	0.358235	0.258787	0.294804	0.301603	0.187268	0.216776	0.189138	0.15952	0.137106	0.152352	0.148457	0.120151	0.0984269	0.112639	0.111692
			691	r_posterior_cingulate_gyrus - [g/ml{SUVbw}]	0.295642	0.380426	0.42725	0.252503	0.259035	0.289107	0.242294	0.316014	0.239879	0.196843	0.155957	0.197455	0.161582	0.165358	0.142539	0.135914	0.145407	0.129459	0.149073	0.159818	0.164667	0.117625	0.166316		747	r_pontine_nuclei - [g/ml{SUVbw}]	0.989207	1.30023	1.08032	1.11399	1.11771	1.08271	1.07061	1.09824	1.03112	1.01697	0.937978	0.860828	0.831948	0.848818	0.697664	0.678284	0.655561	0.615023	0.600479
			749	r_posterior_column_of_the_fornix - [g/ml{SUVbw}]	0.398066	0.261346	0.288945	0.209188	0.262961	0.23454	0.261162	0.255469	0.297466	0.198215	0.21536	0.22203	0.141871	0.142329	0.138301	0.138019	0.168098	0.144755	0.18249	0.177987	0.145793	0.155855	0.181099		741	r_postcentral_gyrus - [g/ml{SUVbw}]	0.470133	0.256221	0.306816	0.287096	0.273404	0.266435	0.269235	0.25868	0.233762	0.239832	0.208821	0.197767	0.183629	0.177847	0.152959	0.141887	0.132473	0.13037	0.131828
			785	r_posterior_commissure - [g/ml{SUVbw}]	0.774178	0.264298	0.381467	0.278809	0.346959	0.454495	0.363092	0.22717	0.456596	0.178057	0.228348	0.279842	0.164398	0.147927	0.13614	0.129536	0.166284	0.131141	0.192463	0.143199	0.158199	0.146083	0.142533		827	r_postcommissural_fornix - [g/ml{SUVbw}]	1.0298	0.766911	0.743419	0.539662	0.727804	0.64181	0.599971	0.571534	0.563962	0.512764	0.514711	0.499482	0.502946	0.366421	0.410186	0.38159	0.353078	0.400902	0.401242
			699	r_posterior_parahippocampal_gyrus - [g/ml{SUVbw}]	0.352302	0.317045	0.363895	0.275736	0.275915	0.239553	0.238456	0.238941	0.199615	0.224424	0.181751	0.164852	0.148354	0.135109	0.15818	0.145356	0.151807	0.145854	0.138393	0.14828	0.148651	0.146979	0.176377		669	r_posterior_cingulate_gyrus - [g/ml{SUVbw}]	0.82019	0.471139	0.518072	0.391479	0.436842	0.369877	0.416936	0.381542	0.377297	0.331112	0.344984	0.298365	0.282456	0.262405	0.222786	0.194529	0.19552	0.191499	0.184585
			881	r_posterior_part_of_the_anterior_commissure - [g/ml{SUVbw}]	0.423088	0.389921	0.424775	0.253549	0.231215	0.317003	0.17388	0.201654	0.203588	0.262766	0.228332	0.162608	0.168715	0.178233	0.157644	0.157715	0.195517	0.171679	0.208483	0.220261	0.206276	0.270288	0.274477		723	r_posterior_column_of_the_fornix - [g/ml{SUVbw}]	0.593907	0.381102	0.500012	0.346877	0.350498	0.378597	0.321549	0.380392	0.27064	0.314038	0.268099	0.245346	0.239731	0.211512	0.193687	0.152534	0.148477	0.151439	0.141926
			1077	r_posterodorsal_tegmental_nucleus - [g/ml{SUVbw}]	0.21468	0.677022	0.207148	0.228639	0.116792	0.161105	0.194658	0.188397	0.186955	0.165353	0.141005	0.116339	0.0827	0.182855	0.105	0.100352	0.106069	0.116249	0.0972853	0.0932492	0.0953264	0.139159	0.0838443		751	r_posterior_commissure - [g/ml{SUVbw}]	0.436874	0.237963	0.271584	0.23661	0.329223	0.268011	0.320188	0.282408	0.21218	0.206169	0.19813	0.159476	0.138948	0.158941	0.150808	0.122548	0.104348	0.1158	0.112944
			1041	r_posteroventral_cochlear_nucleus - [g/ml{SUVbw}]	0.611626	0.192865	0.437914	0.352253	0.4584	0.289864	0.282374	0.252951	0.282687	0.23365	0.200264	0.153568	0.123048	0.120132	0.142782	0.155344	0.112515	0.154714	0.154568	0.173445	0.149164	0.148437	0.145383		675	r_posterior_parahippocampal_gyrus - [g/ml{SUVbw}]	0.877784	0.679644	0.651684	0.604974	0.540491	0.590568	0.595869	0.599236	0.558379	0.461905	0.483908	0.442728	0.427674	0.406001	0.364563	0.369118	0.360653	0.363622	0.395307
			821	r_precentral_gyrus - [g/ml{SUVbw}]	0.19864	0.286624	0.319149	0.250964	0.244112	0.24539	0.209668	0.224561	0.197511	0.198084	0.18648	0.183083	0.146934	0.137386	0.167032	0.170211	0.169346	0.169915	0.197844	0.191357	0.19495	0.200175	0.208865		845	r_posterior_part_of_the_anterior_commissure - [g/ml{SUVbw}]	0.728075	0.410176	0.440114	0.433829	0.394818	0.374096	0.321939	0.423986	0.329941	0.334036	0.297374	0.31157	0.27944	0.234749	0.238588	0.212986	0.208468	0.198919	0.216876
			1087	r_precommissural_nucleus - [g/ml{SUVbw}]	0.960078	0.276683	0.47647	0.278992	0.426896	0.485923	0.401845	0.246103	0.530297	0.208309	0.246466	0.329516	0.170603	0.159629	0.144403	0.137487	0.178003	0.143713	0.202607	0.156976	0.16535	0.159702	0.161731		1031	r_posterodorsal_tegmental_nucleus - [g/ml{SUVbw}]	0.553543	0.325949	0.336313	0.337383	0.369854	0.363807	0.297883	0.357156	0.321135	0.289754	0.268738	0.285767	0.255981	0.233685	0.218063	0.211921	0.1843	0.1957	0.193911
			603	r_precuneus - [g/ml{SUVbw}]	0.610447	0.629689	0.532969	0.504067	0.345552	0.346739	0.391545	0.402345	0.384158	0.33409	0.314657	0.281527	0.307314	0.26241	0.234632	0.247485	0.234433	0.219471	0.252158	0.254019	0.245769	0.2493	0.237281		995	r_posteroventral_cochlear_nucleus - [g/ml{SUVbw}]	0.815808	0.601216	0.540864	0.621699	0.610938	0.621112	0.523563	0.487037	0.523402	0.430834	0.478203	0.471657	0.412277	0.381863	0.387666	0.313848	0.315275	0.352917	0.338575
			899	r_prepyriform_area - [g/ml{SUVbw}]	0.567302	0.279342	0.240684	0.27935	0.186841	0.229188	0.228242	0.197551	0.250948	0.200472	0.231742	0.144365	0.234929	0.220161	0.213976	0.206349	0.177418	0.220262	0.213472	0.288881	0.215653	0.289788	0.258429		789	r_precentral_gyrus - [g/ml{SUVbw}]	0.602453	0.377831	0.356197	0.352826	0.334688	0.334043	0.305463	0.307255	0.270552	0.268402	0.248556	0.235098	0.212016	0.217122	0.18611	0.173416	0.170388	0.174617	0.173211
			1111	r_presubiculum - [g/ml{SUVbw}]	0.395675	0.284619	0.373458	0.254711	0.289596	0.260184	0.28947	0.236024	0.202231	0.218654	0.211461	0.177509	0.151971	0.177671	0.165172	0.147113	0.157934	0.161246	0.164838	0.159533	0.183112	0.167458	0.19085		583	r_precuneus - [g/ml{SUVbw}]	0.676166	0.455075	0.458661	0.396414	0.432029	0.415974	0.36595	0.361052	0.346247	0.327156	0.28003	0.280858	0.267318	0.238982	0.204361	0.180608	0.176047	0.159464	0.169477
			675	r_principal_inferior_olivary_nucleus - [g/ml{SUVbw}]	0.54164	0.403093	0.542737	0.39245	0.333396	0.298877	0.402342	0.317631	0.28858	0.211638	0.282967	0.168686	0.187396	0.186331	0.212843	0.201576	0.202527	0.257949	0.213019	0.212462	0.270096	0.300921	0.220944		863	r_prepyriform_area - [g/ml{SUVbw}]	1.13207	0.82748	0.70291	0.68494	0.468046	0.612986	0.670286	0.572205	0.539564	0.52485	0.456257	0.514106	0.464302	0.411884	0.378139	0.333887	0.363306	0.387011	0.413614
			1029	r_principal_sensory_nucleus_of_the_trigeminal_nerve - [g/ml{SUVbw}]	0.305873	0.354312	0.254307	0.249299	0.171009	0.228293	0.224181	0.195122	0.19307	0.275846	0.153478	0.132426	0.164578	0.153384	0.119617	0.118373	0.125132	0.160642	0.0928407	0.126563	0.110765	0.138533	0.145077		1069	r_presubiculum - [g/ml{SUVbw}]	0.798325	0.769671	0.694088	0.709878	0.607983	0.671906	0.658792	0.65264	0.685065	0.610771	0.570928	0.512715	0.496887	0.469331	0.423103	0.405786	0.404096	0.41758	0.43746
		Striatum	747	r_putamen - [g/ml{SUVbw}]	0.290474	0.154766	0.170886	0.161912	0.193995	0.188885	0.134863	0.145142	0.136123	0.162556	0.136876	0.110414	0.105491	0.13541	0.105942	0.100089	0.113953	0.114494	0.113041	0.132573	0.117387	0.141583	0.122498		721	r_putamen - [g/ml{SUVbw}]	0.654092	0.429207	0.397734	0.419786	0.333941	0.333739	0.345559	0.320019	0.306643	0.278333	0.273697	0.278681	0.232313	0.229696	0.199467	0.191661	0.190136	0.202808	0.205725
			625	r_pyramidal_decussation - [g/ml{SUVbw}]	0.682344	0.4304	0.653696	0.528156	0.509792	0.360564	0.391517	0.380065	0.243244	0.317278	0.240927	0.281718	0.291341	0.228356	0.233491	0.259124	0.274236	0.256382	0.295356	0.261867	0.272237	0.270785	0.300366		605	r_pyramidal_decussation - [g/ml{SUVbw}]	0.303143	0.487999	0.635686	0.68629	0.729859	0.806167	0.758131	0.679676	0.628656	0.664229	0.647217	0.547219	0.534557	0.538845	0.529173	0.421683	0.477204	0.48613	0.502507
			667	r_pyramidal_tract - [g/ml{SUVbw}]	0.407506	0.432247	0.521519	0.441766	0.391496	0.31895	0.313938	0.306147	0.30581	0.265221	0.298059	0.203352	0.219646	0.187834	0.220301	0.222331	0.238026	0.260461	0.247809	0.253659	0.268537	0.28975	0.253685		645	r_pyramidal_tract - [g/ml{SUVbw}]	0.335852	0.443314	0.550621	0.65219	0.691464	0.676168	0.672491	0.639027	0.600847	0.659071	0.582305	0.469	0.492711	0.473313	0.459394	0.425778	0.4233	0.436993	0.443486
			753	r_reticular_nucleus_of_the_thalamus - [g/ml{SUVbw}]	0.218511	0.283209	0.217576	0.216134	0.217389	0.215375	0.186508	0.140359	0.190895	0.157842	0.128478	0.0851018	0.110671	0.144138	0.107553	0.139174	0.116831	0.106259	0.109355	0.100464	0.108882	0.106235	0.102392		727	r_reticular_nucleus_of_the_thalamus - [g/ml{SUVbw}]	0.492525	0.343934	0.328575	0.279474	0.346642	0.324669	0.305834	0.273726	0.302755	0.282478	0.256831	0.213422	0.231665	0.17304	0.182286	0.156063	0.149419	0.143372	0.152193
			779	r_reticulotegmental_nucleus - [g/ml{SUVbw}]	0.161366	0.330316	0.341438	0.258101	0.295452	0.142591	0.193313	0.195586	0.146065	0.135495	0.118913	0.129892	0.129465	0.122375	0.130631	0.0926278	0.115049	0.118162	0.141852	0.116925	0.156919	0.127903	0.12832		937	r_reuniens_nucleus - [g/ml{SUVbw}]	0.752924	0.357328	0.393548	0.258	0.382173	0.360539	0.344345	0.288343	0.341126	0.258161	0.293163	0.248591	0.238279	0.177	0.202895	0.167368	0.155149	0.152995	0.176251
			973	r_reuniens_nucleus - [g/ml{SUVbw}]	0.273508	0.0822968	0.240236	0.232808	0.267237	0.210942	0.217223	0.153208	0.161847	0.141587	0.133474	0.124315	0.0977507	0.146352	0.121119	0.130618	0.0950063	0.116281	0.132809	0.106958	0.0926969	0.111299	0.145074		1085	r_rostrum_of_the_corpus_callosum - [g/ml{SUVbw}]	0.371481	0.482083	0.341293	0.358074	0.405101	0.328661	0.356967	0.369374	0.281042	0.291408	0.262838	0.278211	0.262325	0.22084	0.228616	0.198971	0.187141	0.169093	0.210476
			1127	r_rostrum_of_the_corpus_callosum - [g/ml{SUVbw}]	0.17552	0.268967	0.403265	0.0875445	0.155467	0.175127	0.12519	0.233783	0.144206	0.119392	0.110401	0.180412	0.126501	0.145748	0.103436	0.141009	0.138309	0.112173	0.104725	0.114398	0.115645	0.131263	0.0961169		991	r_rubrospinal_tract - [g/ml{SUVbw}]	0.334014	0.657434	0.581277	0.613455	0.741938	0.634612	0.578643	0.669304	0.669818	0.632357	0.524162	0.505005	0.546748	0.452492	0.480113	0.395498	0.445178	0.437189	0.446345
			1037	r_rubrospinal_tract - [g/ml{SUVbw}]	0.528099	0.549102	0.477486	0.327063	0.526855	0.405469	0.266964	0.444375	0.343842	0.254924	0.296972	0.275087	0.26205	0.187894	0.222553	0.305116	0.25669	0.250517	0.304181	0.251278	0.287003	0.265149	0.328566		989	r_septum_pellucidum - [g/ml{SUVbw}]	0.374898	0.439311	0.355695	0.299327	0.398816	0.336163	0.32697	0.33516	0.268904	0.281186	0.235378	0.258254	0.245437	0.208503	0.215297	0.157514	0.144073	0.141834	0.152638
			1035	r_septum_pellucidum - [g/ml{SUVbw}]	0.223949	0.192927	0.273945	0.103435	0.109168	0.142061	0.133503	0.202423	0.121142	0.143513	0.0961839	0.125643	0.123151	0.126114	0.0913742	0.118085	0.106821	0.10268	0.0905864	0.0938005	0.0933816	0.106023	0.0792127		905	r_simple_lobule - [g/ml{SUVbw}]	0.553294	0.364292	0.375418	0.352408	0.316407	0.31443	0.287762	0.294233	0.294385	0.264732	0.242046	0.24206	0.214606	0.188784	0.167448	0.165505	0.146782	0.150536	0.153476
			941	r_simple_lobule - [g/ml{SUVbw}]	0.491265	0.220729	0.193065	0.153022	0.180005	0.192394	0.190598	0.161095	0.130267	0.154974	0.153955	0.126036	0.126639	0.122026	0.118072	0.112652	0.109214	0.106954	0.107973	0.124908	0.117633	0.0976283	0.119376		631	r_solitary_nucleus - [g/ml{SUVbw}]	0.527614	0.558269	0.628084	0.544848	0.742753	0.594652	0.648622	0.584244	0.594564	0.49871	0.578239	0.452077	0.452764	0.448499	0.429038	0.351977	0.364417	0.375408	0.390853
			655	r_solitary_nucleus - [g/ml{SUVbw}]	0.184732	0.218756	0.312812	0.303396	0.174234	0.216545	0.195797	0.204405	0.123874	0.190698	0.09753	0.138491	0.102785	0.078688	0.115822	0.127605	0.11739	0.127934	0.114521	0.116897	0.145587	0.134791	0.142597		633	r_solitary_tract - [g/ml{SUVbw}]	0.520475	0.535532	0.598768	0.496233	0.680771	0.548356	0.611872	0.560465	0.557852	0.449919	0.554154	0.420608	0.429908	0.41966	0.399308	0.331635	0.341004	0.351461	0.35637
			613	r_spinal_trigeminal_tract_of_the_medulla - [g/ml{SUVbw}]	0.484831	0.383143	0.424871	0.310306	0.461916	0.293016	0.259802	0.342987	0.296539	0.20308	0.248809	0.199448	0.18522	0.156702	0.163101	0.230323	0.179977	0.205789	0.217307	0.206666	0.234938	0.220806	0.237007		593	r_spinal_trigeminal_tract_of_the_medulla - [g/ml{SUVbw}]	0.450173	0.611189	0.602127	0.614908	0.718111	0.627436	0.58665	0.651564	0.625586	0.574464	0.558036	0.511021	0.508419	0.450471	0.468046	0.381225	0.400524	0.423945	0.427319
			1023	r_spinothalamic_tract_of_the_medulla - [g/ml{SUVbw}]	0.65418	0.635002	0.526685	0.402627	0.571013	0.437426	0.346733	0.500231	0.382164	0.315868	0.311669	0.299647	0.302638	0.216776	0.244992	0.325889	0.280182	0.269368	0.32691	0.275693	0.304136	0.273842	0.340113		981	r_spinothalamic_tract_of_the_medulla - [g/ml{SUVbw}]	0.322035	0.583778	0.528336	0.636128	0.758693	0.6558	0.617211	0.629034	0.672222	0.654377	0.556873	0.482161	0.537957	0.441896	0.490266	0.404503	0.449313	0.437668	0.468448
			703	r_splenium_of_the_corpus_callosum - [g/ml{SUVbw}]	0.364956	0.346288	0.251407	0.219661	0.22208	0.21998	0.197014	0.226074	0.252147	0.146007	0.172302	0.147366	0.173835	0.13124	0.141135	0.131934	0.16126	0.134007	0.13638	0.167288	0.145756	0.138076	0.152724		679	r_splenium_of_the_corpus_callosum - [g/ml{SUVbw}]	0.626308	0.470768	0.546731	0.353447	0.418131	0.44445	0.371807	0.364471	0.290445	0.316339	0.314857	0.256022	0.299642	0.223784	0.230096	0.166411	0.180308	0.169464	0.167225
			909	r_straight_gyrus - [g/ml{SUVbw}]	0.482018	0.277868	0.386908	0.289382	0.413126	0.319308	0.255769	0.313338	0.282894	0.277355	0.216116	0.276725	0.230496	0.210399	0.209485	0.21676	0.237631	0.246182	0.294167	0.311124	0.3115	0.324542	0.325067		873	r_straight_gyrus - [g/ml{SUVbw}]	0.448638	0.358354	0.410484	0.438797	0.362943	0.399173	0.377698	0.360295	0.351338	0.37104	0.349032	0.344616	0.304815	0.266101	0.276571	0.27417	0.280713	0.30209	0.34189
			1113	r_stratum_pyramidale_of_the_CA1_field - [g/ml{SUVbw}]	0.294566	0.32028	0.155706	0.269581	0.199057	0.187734	0.176826	0.193947	0.191239	0.134714	0.160512	0.140192	0.131064	0.105794	0.115972	0.107058	0.107203	0.114324	0.131791	0.117538	0.12619	0.121908	0.126616		1071	r_stratum_pyramidale_of_the_CA1_field - [g/ml{SUVbw}]	0.484967	0.361312	0.416172	0.420027	0.354301	0.386722	0.385713	0.344749	0.360957	0.351222	0.307499	0.30962	0.298076	0.289891	0.274125	0.248525	0.246339	0.263009	0.28304
			1117	r_stratum_pyramidale_of_the_CA2_field - [g/ml{SUVbw}]	0.309789	0.299293	0.161785	0.244022	0.166627	0.179052	0.167989	0.187407	0.164232	0.138535	0.158411	0.1373	0.127919	0.108436	0.109035	0.103797	0.100571	0.101406	0.118668	0.113999	0.124512	0.113914	0.118977		1075	r_stratum_pyramidale_of_the_CA2_field - [g/ml{SUVbw}]	0.45959	0.359953	0.399492	0.386933	0.337089	0.354305	0.346842	0.316115	0.311115	0.316753	0.287743	0.285323	0.266679	0.250039	0.235293	0.208837	0.203469	0.212336	0.22516
			1115	r_stratum_pyramidale_of_the_CA3_field - [g/ml{SUVbw}]	0.384897	0.321935	0.290905	0.223132	0.239685	0.261574	0.255333	0.216332	0.21126	0.202039	0.189731	0.145202	0.13807	0.155611	0.131228	0.129701	0.129912	0.126205	0.140136	0.135614	0.16564	0.133934	0.168651		1073	r_stratum_pyramidale_of_the_CA3_field - [g/ml{SUVbw}]	0.714966	0.563906	0.549628	0.564508	0.464869	0.499625	0.475199	0.46979	0.454275	0.442655	0.427454	0.401791	0.376307	0.336692	0.309453	0.292081	0.291155	0.3036	0.319288
			1097	r_stratum_radiatum - [g/ml{SUVbw}]	0.435859	0.398429	0.332406	0.340757	0.313666	0.315514	0.32551	0.261243	0.297922	0.224429	0.246024	0.199581	0.195022	0.194565	0.178112	0.166827	0.173509	0.175411	0.19561	0.187653	0.212544	0.185604	0.232514		1055	r_stratum_radiatum - [g/ml{SUVbw}]	0.561268	0.622361	0.633201	0.646997	0.563038	0.585412	0.548453	0.572594	0.559968	0.550309	0.490867	0.466227	0.456112	0.417966	0.383297	0.363164	0.369251	0.373857	0.393382
			799	r_stria_medullaris - [g/ml{SUVbw}]	0.748204	0.205172	0.400187	0.220428	0.331608	0.277967	0.354584	0.216805	0.367689	0.20118	0.181349	0.267159	0.123672	0.150083	0.131652	0.127485	0.157638	0.129629	0.190477	0.177564	0.145768	0.157496	0.200565		767	r_stria_medullaris - [g/ml{SUVbw}]	0.517217	0.328536	0.359456	0.28725	0.383233	0.316853	0.316415	0.321755	0.312742	0.272828	0.255187	0.225711	0.20641	0.19547	0.177707	0.144558	0.139645	0.131576	0.138923
			739	r_stria_terminalis - [g/ml{SUVbw}]	0.403215	0.461275	0.30412	0.287052	0.260346	0.27323	0.276949	0.23348	0.282199	0.237726	0.202382	0.171988	0.165094	0.175085	0.145015	0.150117	0.153955	0.145161	0.174337	0.167741	0.189253	0.151379	0.197979		713	r_stria_terminalis - [g/ml{SUVbw}]	0.706813	0.617773	0.5888	0.604594	0.478941	0.528453	0.494375	0.502901	0.489108	0.478553	0.444389	0.405184	0.38333	0.328519	0.315889	0.293643	0.299072	0.282598	0.288305
			1109	r_subiculum - [g/ml{SUVbw}]	0.321585	0.308352	0.213194	0.238963	0.239398	0.216694	0.235805	0.203718	0.193946	0.145466	0.185925	0.152247	0.136759	0.134411	0.147657	0.121212	0.13873	0.140414	0.15459	0.138399	0.155176	0.153661	0.158679		1043	r_subcommissural_nucleus - [g/ml{SUVbw}]	0.467497	0.259276	0.277237	0.24559	0.336621	0.284129	0.338958	0.281437	0.225674	0.215424	0.213788	0.170363	0.151288	0.166642	0.159066	0.134085	0.114256	0.123514	0.122297
			1017	r_subparafascicular_nucleus - [g/ml{SUVbw}]	0.591817	0.0900668	0.333399	0.211455	0.270079	0.259413	0.183832	0.178452	0.166933	0.112189	0.141036	0.20125	0.113162	0.110614	0.112666	0.111007	0.110322	0.119244	0.121757	0.0908474	0.117711	0.113859	0.123684		1067	r_subiculum - [g/ml{SUVbw}]	0.596414	0.497716	0.529473	0.570889	0.520145	0.526742	0.524307	0.500217	0.484613	0.468037	0.419838	0.420841	0.394359	0.378943	0.338985	0.345063	0.341389	0.361245	0.379676
			987	r_substantia_innominata - [g/ml{SUVbw}]	0.633307	0.463142	0.229074	0.483408	0.278294	0.317759	0.262956	0.222379	0.325006	0.241753	0.224433	0.181647	0.202526	0.186127	0.167683	0.166835	0.167599	0.204428	0.185067	0.237711	0.172812	0.210683	0.218434		975	r_subparafascicular_nucleus - [g/ml{SUVbw}]	0.730518	0.288939	0.374988	0.308157	0.370835	0.340627	0.35127	0.322184	0.366669	0.262312	0.298757	0.248593	0.223413	0.20624	0.20834	0.16735	0.163153	0.153563	0.180023
			967	r_superior_central_nucleus - [g/ml{SUVbw}]	0.17167	0.318586	0.209835	0.171539	0.208426	0.121264	0.173563	0.144175	0.203088	0.14152	0.102573	0.111818	0.0952631	0.10475	0.104976	0.079702	0.0885956	0.100326	0.0946272	0.0832838	0.105718	0.115086	0.0761436		949	r_substantia_innominata - [g/ml{SUVbw}]	1.16889	0.818594	0.780329	0.709883	0.553668	0.674103	0.658766	0.588688	0.552821	0.559494	0.502298	0.555258	0.513659	0.448933	0.416449	0.388634	0.384057	0.398123	0.416521
			805	r_superior_cerebellar_peduncle_of_the_midbrain - [g/ml{SUVbw}]	0.324406	0.31552	0.277505	0.315185	0.178516	0.206388	0.213427	0.176823	0.197524	0.208247	0.147958	0.130243	0.145695	0.162378	0.112873	0.099258	0.125443	0.152554	0.111434	0.097689	0.0919655	0.137044	0.0917089		931	r_superior_central_nucleus - [g/ml{SUVbw}]	0.690087	0.415629	0.397658	0.37848	0.413801	0.4274	0.394429	0.403365	0.36797	0.403136	0.347168	0.325151	0.297041	0.24259	0.261829	0.247318	0.230754	0.259809	0.243261
			681	r_superior_cerebellar_peduncle_of_the_pons - [g/ml{SUVbw}]	0.280612	0.590563	0.260022	0.37647	0.153402	0.229824	0.238787	0.256697	0.183289	0.271304	0.161472	0.132979	0.114685	0.210717	0.129515	0.115238	0.126022	0.133632	0.119419	0.113609	0.0955681	0.144687	0.124585		773	r_superior_cerebellar_peduncle_of_the_midbrain - [g/ml{SUVbw}]	0.520554	0.302015	0.319319	0.256125	0.301929	0.31341	0.265314	0.274553	0.245202	0.249372	0.214408	0.194666	0.201163	0.188936	0.16555	0.17417	0.138277	0.145834	0.143856
			1167	r_superior_cistern - [g/ml{SUVbw}]	0.429013	0.460787	0.551109	0.279968	0.480268	0.373315	0.294634	0.233889	0.264984	0.329039	0.210682	0.215325	0.188628	0.169335	0.177545	0.180446	0.171031	0.167699	0.19742	0.137446	0.141764	0.146741	0.150862		657	r_superior_cerebellar_peduncle_of_the_pons - [g/ml{SUVbw}]	0.507275	0.294313	0.304331	0.288519	0.292663	0.313125	0.265943	0.272446	0.252081	0.211687	0.206381	0.195002	0.197234	0.186548	0.160518	0.159076	0.133926	0.138868	0.141381
			959	r_superior_colliculus - [g/ml{SUVbw}]	0.617155	0.419326	0.472341	0.260773	0.41553	0.382964	0.361518	0.233254	0.242821	0.332805	0.221468	0.213052	0.179925	0.164651	0.161221	0.194792	0.188746	0.16242	0.191226	0.191904	0.153163	0.162186	0.154553		1125	r_superior_cistern - [g/ml{SUVbw}]	0.543933	0.332912	0.337032	0.297552	0.325108	0.311138	0.303522	0.310684	0.254911	0.304001	0.238667	0.197234	0.189695	0.162318	0.157603	0.151407	0.124368	0.121428	0.124673
			879	r_superior_frontal_gyrus - [g/ml{SUVbw}]	0.312018	0.335454	0.36348	0.291918	0.245732	0.268691	0.250786	0.236054	0.214065	0.22976	0.212773	0.201818	0.202161	0.176161	0.185311	0.194064	0.218013	0.228967	0.226781	0.242285	0.249764	0.279207	0.270432		923	r_superior_colliculus - [g/ml{SUVbw}]	0.568995	0.302436	0.364109	0.23389	0.368841	0.311908	0.295326	0.306017	0.231651	0.253774	0.210615	0.182075	0.179166	0.157354	0.155548	0.137822	0.118913	0.116261	0.119993
			1171	r_superior_olive - [g/ml{SUVbw}]	0.526838	0.394864	0.423099	0.416841	0.259338	0.283472	0.304889	0.230756	0.281431	0.211432	0.261436	0.172488	0.209873	0.205334	0.186332	0.190984	0.188289	0.233244	0.190279	0.204228	0.242266	0.237486	0.209527		843	r_superior_frontal_gyrus - [g/ml{SUVbw}]	0.494027	0.363778	0.372953	0.35026	0.354929	0.321148	0.309777	0.321874	0.302033	0.280224	0.278854	0.251497	0.239047	0.22412	0.199035	0.177599	0.170977	0.167447	0.168664
			605	r_superior_parietal_lobule - [g/ml{SUVbw}]	0.332206	0.387343	0.30577	0.37089	0.286654	0.350526	0.289315	0.296278	0.276891	0.312631	0.284411	0.217198	0.261052	0.210707	0.218017	0.238894	0.226296	0.231764	0.247156	0.241879	0.279309	0.296297	0.253505		1129	r_superior_olive - [g/ml{SUVbw}]	0.499339	0.7958	0.745144	0.77321	0.748617	0.90074	0.791049	0.853612	0.756058	0.821252	0.693058	0.641627	0.589792	0.674634	0.534281	0.529859	0.492305	0.471403	0.476099
			945	r_superior_semilunar_lobule - [g/ml{SUVbw}]	0.334539	0.212822	0.18836	0.190749	0.190083	0.191864	0.148632	0.147131	0.113995	0.146618	0.11985	0.127292	0.115812	0.0940676	0.110247	0.0952447	0.0900558	0.09653	0.0953558	0.120037	0.0949663	0.097104	0.123384		585	r_superior_parietal_lobule - [g/ml{SUVbw}]	0.642116	0.438282	0.408652	0.416561	0.399328	0.36659	0.373137	0.360579	0.336177	0.320427	0.271361	0.270884	0.250421	0.225794	0.195012	0.180444	0.17963	0.160406	0.17155
			677	r_superior_temporal_gyrus - [g/ml{SUVbw}]	0.259117	0.286078	0.318944	0.255862	0.241838	0.241406	0.213245	0.216048	0.207838	0.175909	0.162078	0.166538	0.144855	0.148387	0.144358	0.155923	0.17278	0.176741	0.17422	0.176467	0.191273	0.203596	0.200717		909	r_superior_semilunar_lobule - [g/ml{SUVbw}]	0.714312	0.463837	0.403764	0.432957	0.462535	0.442908	0.413821	0.378505	0.400066	0.348659	0.342561	0.337068	0.296421	0.294489	0.247574	0.232404	0.228062	0.241613	0.248613
			999	r_superior_vestibular_nucleus - [g/ml{SUVbw}]	0.32051	1.11556	0.202024	0.448306	0.14965	0.233666	0.266627	0.301488	0.178532	0.220104	0.163303	0.143526	0.0894972	0.185527	0.126972	0.116024	0.113314	0.108446	0.126165	0.11341	0.0970587	0.150575	0.106314		653	r_superior_temporal_gyrus - [g/ml{SUVbw}]	0.534471	0.405573	0.369009	0.355288	0.367528	0.339855	0.328446	0.33557	0.306387	0.314023	0.2745	0.257503	0.249077	0.229067	0.212417	0.192923	0.188727	0.192334	0.198082
			663	r_supramarginal_gyrus - [g/ml{SUVbw}]	0.219977	0.186747	0.267743	0.217352	0.196568	0.22168	0.20515	0.202772	0.207692	0.192425	0.180162	0.167389	0.167594	0.161166	0.151802	0.171122	0.173247	0.190989	0.17962	0.183203	0.216418	0.206953	0.206479		961	r_superior_vestibular_nucleus - [g/ml{SUVbw}]	0.453506	0.323177	0.305628	0.31453	0.333444	0.32493	0.297215	0.273906	0.288533	0.216968	0.206622	0.216361	0.221584	0.206228	0.180332	0.162708	0.145329	0.156268	0.162355
			883	r_supraoptic_nucleus - [g/ml{SUVbw}]	0.455002	0.573133	0.245846	0.584409	0.324847	0.357154	0.318925	0.231778	0.377461	0.269581	0.216791	0.184165	0.214253	0.169791	0.151229	0.15574	0.161182	0.199265	0.175986	0.203801	0.156069	0.172688	0.182118		641	r_supramarginal_gyrus - [g/ml{SUVbw}]	0.458528	0.31471	0.297013	0.265792	0.301131	0.255928	0.285057	0.25513	0.243827	0.234683	0.19736	0.196502	0.190839	0.162155	0.149932	0.131486	0.125453	0.125674	0.125046
			623	r_supraspinal_nucleus - [g/ml{SUVbw}]	0.794981	0.504838	0.623837	0.557084	0.548166	0.408612	0.423996	0.422181	0.300981	0.344303	0.275718	0.308076	0.328234	0.245388	0.26319	0.287675	0.297052	0.281318	0.318184	0.273683	0.297283	0.285828	0.33102		847	r_supraoptic_nucleus - [g/ml{SUVbw}]	1.19218	0.908095	0.986595	0.762244	0.797795	0.773334	0.786816	0.7176	0.654837	0.677007	0.677773	0.649919	0.640682	0.52165	0.53121	0.520248	0.473918	0.504049	0.506918
			647	r_tectospinal_tract_of_the_medulla - [g/ml{SUVbw}]	0.592041	0.420362	0.68607	0.519465	0.501468	0.327652	0.358232	0.402103	0.244603	0.336035	0.239335	0.255159	0.278421	0.211886	0.215782	0.258574	0.264886	0.237072	0.281314	0.256377	0.261133	0.26233	0.278884		603	r_supraspinal_nucleus - [g/ml{SUVbw}]	0.300569	0.473364	0.578835	0.658671	0.738991	0.76635	0.716414	0.651733	0.632082	0.650346	0.632294	0.51577	0.533386	0.506204	0.517766	0.412818	0.469658	0.471881	0.483985
			751	r_telodiencephalic_fissure - [g/ml{SUVbw}]	0.651009	0.365165	0.416769	0.213678	0.409058	0.357876	0.364338	0.260103	0.346348	0.254586	0.221348	0.277386	0.155696	0.165892	0.149535	0.157744	0.182575	0.149959	0.202521	0.216679	0.162471	0.173339	0.192192		623	r_tectospinal_tract_of_the_medulla - [g/ml{SUVbw}]	0.298998	0.427711	0.547507	0.652689	0.749476	0.734499	0.702445	0.629609	0.605574	0.633857	0.606463	0.481777	0.509394	0.47916	0.491847	0.395197	0.456374	0.4471	0.46569
			709	r_temporal_horn_of_the_lateral_ventricle - [g/ml{SUVbw}]	0.414684	0.347993	0.270626	0.318892	0.284037	0.274012	0.283133	0.252887	0.270751	0.197057	0.211105	0.171136	0.181869	0.163017	0.152401	0.14232	0.154333	0.144254	0.163735	0.167423	0.182993	0.161696	0.194374		725	r_telodiencephalic_fissure - [g/ml{SUVbw}]	0.613705	0.325304	0.426425	0.25536	0.392888	0.328322	0.31302	0.347741	0.261635	0.271022	0.236167	0.212213	0.190039	0.187212	0.175089	0.142054	0.128605	0.130074	0.130126
			829	r_temporal_white_matter - [g/ml{SUVbw}]	0.424296	0.428656	0.439628	0.355636	0.327247	0.306667	0.312123	0.293911	0.322139	0.25959	0.236773	0.217285	0.202217	0.185703	0.18535	0.204814	0.232748	0.228192	0.245233	0.238192	0.257858	0.280753	0.269843		685	r_temporal_horn_of_the_lateral_ventricle - [g/ml{SUVbw}]	0.472548	0.49193	0.515318	0.492914	0.43462	0.458053	0.429391	0.438419	0.41152	0.404479	0.391726	0.359684	0.364039	0.328836	0.294941	0.281381	0.280095	0.289142	0.30234
			1159	r_thalamostriate_vein - [g/ml{SUVbw}]	0.501462	0.158773	0.292883	0.261987	0.217654	0.285343	0.265054	0.187687	0.232305	0.218738	0.188358	0.146887	0.114951	0.145361	0.128114	0.131497	0.124839	0.116386	0.150699	0.135952	0.128903	0.134631	0.14861		797	r_temporal_white_matter - [g/ml{SUVbw}]	0.522158	0.462298	0.482367	0.450127	0.47752	0.471554	0.445752	0.442366	0.415898	0.430032	0.394379	0.356731	0.362587	0.319464	0.314687	0.301175	0.288923	0.305216	0.32483
			1145	r_thalamus - [g/ml{SUVbw}]	0.439385	0.137776	0.303846	0.235244	0.306032	0.233055	0.272584	0.19634	0.225321	0.177387	0.154376	0.17818	0.118874	0.151497	0.125682	0.132859	0.121338	0.126942	0.159168	0.131095	0.121251	0.143002	0.170745		1117	r_thalamostriate_vein - [g/ml{SUVbw}]	0.472001	0.31194	0.362014	0.33343	0.339963	0.313103	0.297517	0.285037	0.296321	0.291553	0.236615	0.236463	0.236527	0.19128	0.180837	0.149543	0.140034	0.136088	0.138976
			793	r_third_ventricle - [g/ml{SUVbw}]	0.524337	0.19549	0.306487	0.245874	0.276493	0.285873	0.306176	0.188359	0.318561	0.166283	0.175322	0.216167	0.122036	0.151415	0.1293	0.126121	0.141999	0.118373	0.172945	0.158783	0.137609	0.141932	0.163092		1103	r_thalamus - [g/ml{SUVbw}]	0.697046	0.414794	0.418443	0.330464	0.421112	0.372047	0.357173	0.359203	0.396264	0.310684	0.308017	0.280017	0.25981	0.223457	0.222394	0.187854	0.183704	0.176943	0.187617
			957	r_trapezoid_body - [g/ml{SUVbw}]	0.569557	0.375857	0.495974	0.406183	0.314008	0.308496	0.36189	0.270022	0.291634	0.235088	0.269534	0.170496	0.203999	0.188277	0.182869	0.185809	0.18231	0.227976	0.183882	0.203141	0.234115	0.233183	0.217024		759	r_third_ventricle - [g/ml{SUVbw}]	0.527501	0.292462	0.331854	0.276615	0.376701	0.30442	0.32405	0.292476	0.286209	0.256733	0.242552	0.213191	0.195176	0.181639	0.176764	0.142955	0.134195	0.130041	0.140416
			1175	r_trapezoid_nuclei - [g/ml{SUVbw}]	0.429224	0.344114	0.32343	0.306933	0.32293	0.274498	0.251876	0.233231	0.227429	0.219821	0.199908	0.174713	0.173244	0.165871	0.153758	0.15853	0.160637	0.1672	0.163745	0.16476	0.166289	0.16698	0.182925		921	r_trapezoid_body - [g/ml{SUVbw}]	0.520935	0.770513	0.692191	0.744531	0.717219	0.805127	0.740373	0.752523	0.710639	0.721568	0.649013	0.592744	0.563011	0.59148	0.496312	0.489006	0.44349	0.449209	0.460669
			725	r_trigeminal_nerve - [g/ml{SUVbw}]	0.901246	0.356193	0.390363	0.535169	0.316502	0.301712	0.289323	0.310659	0.296078	0.365301	0.232383	0.231284	0.268967	0.201118	0.20548	0.225447	0.199137	0.209605	0.200773	0.189279	0.186544	0.207391	0.255663		1133	r_trapezoid_nuclei - [g/ml{SUVbw}]	0.708221	0.522393	0.525023	0.494563	0.468824	0.477333	0.442905	0.454273	0.419768	0.392907	0.373673	0.359261	0.344548	0.321284	0.284976	0.263974	0.251085	0.262514	0.269106
			1003	r_trigeminal_nerve_fibers - [g/ml{SUVbw}]	0.625674	0.334037	0.357186	0.416792	0.244545	0.293473	0.329744	0.281399	0.270972	0.343181	0.25603	0.19778	0.24182	0.190972	0.163118	0.168539	0.158217	0.199828	0.149714	0.170133	0.164929	0.178859	0.223428		965	r_trigeminal_nerve_fibers - [g/ml{SUVbw}]	0.786798	1.06656	0.853548	0.738325	0.681582	0.777885	0.87322	0.748723	0.697915	0.584049	0.567607	0.538663	0.563241	0.54633	0.470257	0.470685	0.464004	0.426397	0.472619
			723	r_trochlear_nerve_fibers - [g/ml{SUVbw}]	0.424638	0.265615	0.312396	0.334881	0.205625	0.225501	0.234671	0.167797	0.211632	0.229696	0.153288	0.139718	0.157975	0.135345	0.115192	0.10372	0.124941	0.149411	0.124429	0.103513	0.0958004	0.137526	0.0928148		699	r_trochlear_nerve_fibers - [g/ml{SUVbw}]	0.530136	0.298729	0.312836	0.245084	0.314211	0.307969	0.275895	0.273562	0.241359	0.262958	0.218982	0.188711	0.202057	0.180767	0.162866	0.172049	0.136899	0.14775	0.139451
			1149	r_trochlear_nucleus - [g/ml{SUVbw}]	0.414118	0.295633	0.265875	0.291472	0.210132	0.207113	0.241959	0.12881	0.192447	0.184318	0.124089	0.13237	0.155106	0.0892787	0.107384	0.0914165	0.106664	0.11086	0.131775	0.0983682	0.10688	0.127944	0.0782436		1107	r_trochlear_nucleus - [g/ml{SUVbw}]	0.578176	0.334502	0.325639	0.286327	0.345025	0.327216	0.33003	0.311657	0.264253	0.311074	0.255443	0.21659	0.226759	0.184418	0.184603	0.184739	0.159366	0.174521	0.164238
			935	r_tuber - [g/ml{SUVbw}]	0.456947	0.328476	0.27751	0.242298	0.367075	0.272574	0.266623	0.258297	0.247395	0.25599	0.283149	0.21608	0.215261	0.192113	0.135066	0.177072	0.158011	0.154915	0.171955	0.146003	0.186849	0.157719	0.184413		899	r_tuber - [g/ml{SUVbw}]	0.474069	0.317041	0.273114	0.295847	0.307015	0.275878	0.288411	0.286688	0.220552	0.246819	0.217986	0.204411	0.205748	0.187198	0.161792	0.153491	0.160476	0.146217	0.151211
			921	r_uvula - [g/ml{SUVbw}]	0.312115	0.262103	0.26181	0.229038	0.124397	0.204212	0.176508	0.198904	0.134333	0.130825	0.108154	0.125704	0.121485	0.0966173	0.114039	0.0968264	0.098518	0.0984276	0.093032	0.111151	0.119772	0.0923061	0.134579		885	r_uvula - [g/ml{SUVbw}]	0.468974	0.580876	0.641792	0.456797	0.510729	0.478426	0.483672	0.435725	0.41501	0.396709	0.431544	0.333635	0.335315	0.317543	0.279652	0.26266	0.276229	0.279646	0.267002
			777	r_ventral_nucleus_of_the_medial_geniculate_body - [g/ml{SUVbw}]	0.259342	0.144244	0.227436	0.21804	0.212281	0.163135	0.286935	0.151237	0.122318	0.126252	0.14549	0.110354	0.106581	0.0985291	0.0887467	0.0870383	0.0997044	0.105057	0.0859649	0.106395	0.0958031	0.0808088	0.107025		609	r_ventral_reticular_nucleus - [g/ml{SUVbw}]	0.30376	0.45101	0.546295	0.650306	0.778076	0.714718	0.68442	0.633326	0.627543	0.644284	0.606414	0.472958	0.52025	0.469429	0.494766	0.39704	0.454025	0.444506	0.466307
			629	r_ventral_reticular_nucleus - [g/ml{SUVbw}]	0.54614	0.448249	0.634872	0.499674	0.477439	0.316446	0.34774	0.420839	0.265999	0.321673	0.244886	0.234445	0.262662	0.187535	0.204447	0.264093	0.248411	0.222217	0.272783	0.236384	0.255924	0.256262	0.26566		955	r_ventral_spinocerebellar_tract - [g/ml{SUVbw}]	0.486404	0.327974	0.336134	0.333202	0.344379	0.355727	0.307333	0.315283	0.301632	0.262525	0.245674	0.227189	0.239243	0.213889	0.197275	0.184942	0.169315	0.172043	0.176129
			991	r_ventral_spinocerebellar_tract - [g/ml{SUVbw}]	0.296743	0.53589	0.278483	0.38672	0.177024	0.234186	0.251036	0.264714	0.195799	0.283999	0.170986	0.142115	0.119828	0.206946	0.1325	0.119063	0.128403	0.139483	0.12517	0.115208	0.0959135	0.143862	0.125606		927	r_ventral_tegmental_area - [g/ml{SUVbw}]	1.3599	0.837179	0.925306	0.830122	0.86321	0.782268	0.744714	0.800686	0.759789	0.683336	0.64599	0.703175	0.624022	0.564587	0.516069	0.456469	0.461208	0.474779	0.473447
			963	r_ventral_tegmental_area - [g/ml{SUVbw}]	0.367543	0.206717	0.293122	0.189667	0.224744	0.195767	0.161723	0.18616	0.139824	0.16031	0.128268	0.157848	0.123802	0.132622	0.120263	0.123864	0.120486	0.118322	0.13616	0.111104	0.137015	0.138948	0.152242		1001	r_vestibular_nerve - [g/ml{SUVbw}]	0.718184	0.796426	0.665253	0.662187	0.695185	0.726958	0.652578	0.615367	0.591164	0.531363	0.590978	0.542672	0.491244	0.472182	0.447696	0.382669	0.356044	0.405204	0.415953
			989	r_vestibulocochlear_nerve - [g/ml{SUVbw}]	0.582283	0.335154	0.315204	0.355061	0.274832	0.304253	0.359024	0.302672	0.266165	0.339608	0.252001	0.207692	0.216998	0.180432	0.151196	0.167408	0.153877	0.186739	0.171898	0.176358	0.181297	0.176306	0.219449		951	r_vestibulocochlear_nerve - [g/ml{SUVbw}]	0.726322	1.11231	0.846831	0.87591	0.68528	0.80254	0.867233	0.731679	0.767757	0.580071	0.600146	0.564463	0.609243	0.526829	0.514975	0.474492	0.497093	0.510274	0.549837
			993	r_vestibulocochlear_nerve_fibers - [g/ml{SUVbw}]	0.617701	0.325777	0.418532	0.398293	0.303009	0.316639	0.406258	0.287696	0.272861	0.322469	0.264434	0.17764	0.216975	0.180416	0.159331	0.165104	0.156401	0.200794	0.162451	0.178257	0.182509	0.17927	0.21024		957	r_vestibulocochlear_nerve_fibers - [g/ml{SUVbw}]	0.690563	0.956239	0.769825	0.730643	0.711672	0.788546	0.750889	0.667798	0.640336	0.575813	0.594554	0.55684	0.539374	0.518373	0.464894	0.419125	0.390819	0.422846	0.433539
																												217	1137	l_occipital_white_matter (2) - [g/ml{SUVbw}]	0.489713	0.327173	0.325944	0.322474	0.301512	0.287508	0.294046	0.27948	0.270899	0.235338	0.240486	0.212483	0.21156	0.193768	0.172674	0.164308	0.159887	0.16479	0.16785
																												400	917	r_flocculus - [g/ml{SUVbw}]	0.930743	0.974959	0.83385	0.885716	0.679536	0.83503	0.7162	0.636147	0.694911	0.604067	0.607782	0.565579	0.522536	0.467594	0.457257	0.399365	0.405156	0.436692	0.432864
																												147	383	l_lateral_hypothalamic_area_-_not_otherwise_specified - [g/ml{SUVbw}]	1.48633	0.821395	0.732854	0.82286	0.74214	0.787568	0.698127	0.639147	0.644436	0.56058	0.578854	0.63511	0.545168	0.493502	0.463056	0.414085	0.405325	0.43152	0.410536
		BW	7.87																									BW	6.6
		Initial dose (mCi)	2.71																									Initial dose (mCi)	6.2
		Residual dose	0.0847																									Residual dose	0.5
		Inj dose	2.6253																									Inj dose	5.7
		Inj dose/kg	0.333583																									Inj dose/kg	0.863636
		Time_Initial																										Time_Initial
		Inj Time																										Inj Time
		Time_Residual																										Time_Residual
		Hippocampus		l_molecular_layer_of_the_hippocampus - [g/ml{SUVbw}]	0.350601	0.276203	0.257915	0.317031	0.270721	0.203377	0.223222	0.219955	0.192951	0.197742	0.180194	0.158184	0.156414	0.13254	0.160444	0.145306	0.146949	0.155621	0.154321	0.172129	0.165294	0.18238	0.169829	Hippocampus		l_molecular_layer_of_the_hippocampus - [g/ml{SUVbw}]	0.348274	0.34966	0.370532	0.397152	0.364408	0.367034	0.361928	0.319465	0.347753	0.312726	0.310254	0.30473	0.268834	0.269391	0.239558	0.22581	0.224396	0.230564	0.247621
		Hippocampus		r_molecular_layer_of_the_hippocampus - [g/ml{SUVbw}]	0.388964	0.347853	0.258479	0.296529	0.270974	0.277841	0.273688	0.225238	0.247433	0.185081	0.211356	0.172327	0.163405	0.163472	0.159767	0.140511	0.149776	0.151792	0.170082	0.157607	0.178448	0.164894	0.190475	Hippocampus		r_molecular_layer_of_the_hippocampus - [g/ml{SUVbw}]	0.563887	0.539281	0.566335	0.584637	0.511644	0.530514	0.519798	0.514666	0.50755	0.499314	0.436583	0.423987	0.41097	0.389693	0.347623	0.331437	0.333446	0.343074	0.359075
		Hypothalamus		l_hypothalamus - [g/ml{SUVbw}]	0.310805	0.285469	0.317027	0.249307	0.440199	0.26419	0.210041	0.206633	0.234008	0.180691	0.217209	0.131373	0.14235	0.174354	0.156122	0.174701	0.1415	0.143908	0.171897	0.159419	0.165092	0.181179	0.174019	Hypothalamus		l_hypothalamus - [g/ml{SUVbw}]	1.22752	0.847028	0.800464	0.658975	0.869521	0.728914	0.670204	0.60369	0.62562	0.608083	0.575359	0.607904	0.536073	0.474038	0.446779	0.409285	0.397563	0.424242	0.441164
		Hypothalamus		r_hypothalamus - [g/ml{SUVbw}]	0.319875	0.321573	0.274393	0.371889	0.382352	0.276581	0.27081	0.260358	0.272022	0.228565	0.239355	0.173102	0.178426	0.190401	0.149434	0.170513	0.14827	0.176704	0.177598	0.173263	0.165929	0.186984	0.177565	Hypothalamus		r_hypothalamus - [g/ml{SUVbw}]	1.19004	0.930959	0.927859	0.678682	0.896464	0.778863	0.763409	0.70037	0.688352	0.674014	0.656266	0.648395	0.630905	0.495518	0.51611	0.492793	0.456326	0.494698	0.500935
		Frontal Cortex		l_middle_frontal_gyrus - [g/ml{SUVbw}]	0.198672	0.177707	0.172777	0.186441	0.162919	0.164273	0.244599	0.189575	0.189109	0.171987	0.164449	0.145494	0.167726	0.146499	0.170972	0.195187	0.205029	0.234915	0.234026	0.258934	0.291934	0.276132	0.268942	Frontal Cortex		l_middle_frontal_gyrus - [g/ml{SUVbw}]	0.310788	0.375373	0.326041	0.309105	0.297276	0.265714	0.277963	0.276668	0.263756	0.268188	0.266285	0.225814	0.217296	0.208059	0.209181	0.20014	0.194363	0.194922	0.208827
		Frontal Cortex		l_inferior_frontal_gyrus - [g/ml{SUVbw}]	0.150458	0.19658	0.163673	0.216315	0.188815	0.179188	0.213289	0.206645	0.151363	0.166743	0.160056	0.165893	0.15968	0.168771	0.180353	0.201526	0.194668	0.238915	0.254613	0.251619	0.273943	0.273007	0.266306	Frontal Cortex		l_inferior_frontal_gyrus - [g/ml{SUVbw}]	0.341914	0.34703	0.31922	0.304684	0.329712	0.286558	0.279906	0.282483	0.28137	0.281856	0.272572	0.2564	0.253507	0.232809	0.236759	0.221148	0.236219	0.240982	0.256949
		Frontal Cortex		l_fronto-orbital_gyrus_(macaque) - [g/ml{SUVbw}]	0.301653	0.284463	0.341576	0.218294	0.274403	0.253204	0.197067	0.206516	0.223357	0.2188	0.212298	0.192736	0.170785	0.205268	0.194893	0.194924	0.235758	0.240653	0.261818	0.279832	0.27521	0.300477	0.31154	Frontal Cortex		l_fronto-orbital_gyrus_(macaque) - [g/ml{SUVbw}]	0.408532	0.33283	0.370238	0.366125	0.343842	0.317	0.338026	0.321051	0.356796	0.325355	0.305785	0.294214	0.27658	0.259751	0.261862	0.246377	0.277124	0.273829	0.296666
		Frontal Cortex		l_lateral_orbital_gyrus - [g/ml{SUVbw}]	0.242152	0.292848	0.206178	0.172666	0.201158	0.249732	0.236639	0.193449	0.167402	0.193746	0.188869	0.160355	0.214229	0.180171	0.231826	0.214952	0.242949	0.250911	0.283296	0.317122	0.310012	0.335148	0.35294	Frontal Cortex		l_lateral_orbital_gyrus - [g/ml{SUVbw}]	0.43522	0.535211	0.430582	0.399991	0.50628	0.368324	0.375947	0.403451	0.371289	0.392544	0.352672	0.335459	0.338124	0.312593	0.289153	0.275901	0.293165	0.285065	0.313425
		Frontal Cortex		l_medial_orbital_gyrus - [g/ml{SUVbw}]	0.375845	0.404684	0.24487	0.252751	0.286165	0.22712	0.203243	0.254002	0.157721	0.202338	0.207803	0.23374	0.182635	0.214349	0.213714	0.202148	0.235988	0.246405	0.28191	0.256565	0.322943	0.300314	0.349362	Frontal Cortex		l_medial_orbital_gyrus - [g/ml{SUVbw}]	0.486439	0.488685	0.426174	0.426636	0.485657	0.403326	0.449148	0.413812	0.371051	0.374447	0.364128	0.349549	0.325951	0.328083	0.287316	0.282352	0.28906	0.293413	0.322281
		Frontal Cortex		r_middle_frontal_gyrus - [g/ml{SUVbw}]	0.298181	0.235572	0.241835	0.276637	0.255763	0.256358	0.211438	0.229354	0.210515	0.203679	0.201694	0.203022	0.209818	0.186297	0.198471	0.205007	0.202026	0.226587	0.225744	0.246712	0.239883	0.275598	0.258426	Frontal Cortex		r_middle_frontal_gyrus - [g/ml{SUVbw}]	0.341859	0.301511	0.272688	0.293641	0.261722	0.281274	0.273967	0.290113	0.241508	0.238149	0.232811	0.219756	0.205598	0.199272	0.187541	0.164086	0.16825	0.178538	0.176275
		Frontal Cortex		r_inferior_frontal_gyrus - [g/ml{SUVbw}]	0.239124	0.340423	0.23583	0.265766	0.251694	0.244208	0.202537	0.223585	0.190638	0.187483	0.17058	0.183025	0.167751	0.177319	0.181511	0.190987	0.196298	0.197754	0.198538	0.222588	0.208077	0.230962	0.230626	Frontal Cortex		r_inferior_frontal_gyrus - [g/ml{SUVbw}]	0.384088	0.305315	0.33214	0.298589	0.311474	0.300726	0.309741	0.277854	0.276453	0.274934	0.257826	0.243195	0.231477	0.214815	0.195766	0.184333	0.189978	0.202053	0.227815
		Frontal Cortex		r_fronto-orbital_gyrus_(macaque) - [g/ml{SUVbw}]	0.234518	0.434052	0.274412	0.275118	0.255052	0.228653	0.196974	0.213576	0.27054	0.207141	0.173093	0.189599	0.175879	0.198897	0.178928	0.184735	0.186306	0.226148	0.239122	0.257222	0.251417	0.287196	0.301057	Frontal Cortex		r_fronto-orbital_gyrus_(macaque) - [g/ml{SUVbw}]	0.520675	0.45195	0.529021	0.400831	0.363005	0.421242	0.390165	0.380581	0.382654	0.360153	0.34629	0.343748	0.313964	0.290174	0.276457	0.25967	0.274983	0.275219	0.318445
		Frontal Cortex		r_lateral_orbital_gyrus - [g/ml{SUVbw}]	0.372407	0.25656	0.282428	0.315351	0.264248	0.265044	0.221402	0.251242	0.255014	0.221504	0.218058	0.194014	0.180749	0.186788	0.177639	0.187064	0.200606	0.212254	0.232317	0.220745	0.236572	0.248495	0.238818	Frontal Cortex		r_lateral_orbital_gyrus - [g/ml{SUVbw}]	0.65167	0.455384	0.460917	0.420078	0.433154	0.425248	0.402388	0.384042	0.382778	0.34172	0.330672	0.310603	0.329883	0.292381	0.274089	0.250459	0.255355	0.288041	0.320999
		Frontal Cortex		r_medial_orbital_gyrus - [g/ml{SUVbw}]																								Frontal Cortex		r_medial_orbital_gyrus - [g/ml{SUVbw}]
		Striatum		l_putamen - [g/ml{SUVbw}]	0.249445	0.218167	0.226596	0.200395	0.192552	0.173528	0.180831	0.159617	0.181734	0.145202	0.1524	0.140272	0.189459	0.114553	0.11355	0.116649	0.121074	0.124342	0.130079	0.13571	0.144739	0.13304	0.149727	Striatum		l_putamen - [g/ml{SUVbw}]	0.559391	0.483425	0.3999	0.377414	0.421264	0.393927	0.344287	0.339675	0.319017	0.308948	0.308995	0.272503	0.278264	0.243029	0.208834	0.213142	0.217494	0.234617	0.230608
		Striatum		l_lateral_globus_pallidus - [g/ml{SUVbw}]	0.134919	0.13366	0.222876	0.203791	0.112438	0.198343	0.170366	0.182566	0.145573	0.152463	0.142214	0.133292	0.112483	0.0824355	0.108705	0.120061	0.0954392	0.0851211	0.0887457	0.121555	0.119891	0.0908449	0.0835529	Striatum		l_lateral_globus_pallidus - [g/ml{SUVbw}]
		Striatum		l_outer_portion_of_the_medial_globus_pallidus - [g/ml{SUVbw}]	0.166763	0.280661	0.345973	0.212498	0.114594	0.201006	0.138481	0.184123	0.160873	0.190909	0.148917	0.114317	0.103494	0.088233	0.134142	0.128328	0.0970398	0.0988328	0.0942805	0.123641	0.129211	0.107348	0.0861356	Striatum		l_outer_portion_of_the_medial_globus_pallidus - [g/ml{SUVbw}]
		Striatum		r_putamen - [g/ml{SUVbw}]	0.290474	0.154766	0.170886	0.161912	0.193995	0.188885	0.134863	0.145142	0.136123	0.162556	0.136876	0.110414	0.105491	0.13541	0.105942	0.100089	0.113953	0.114494	0.113041	0.132573	0.117387	0.141583	0.122498	Striatum		r_putamen - [g/ml{SUVbw}]	0.654092	0.429207	0.397734	0.419786	0.333941	0.333739	0.345559	0.320019	0.306643	0.278333	0.273697	0.278681	0.232313	0.229696	0.199467	0.191661	0.190136	0.202808	0.205725
		Striatum		r_lateral_globus_pallidus - [g/ml{SUVbw}]	0.269429	0.426518	0.226966	0.178445	0.0679392	0.250474	0.117757	0.14619	0.229646	0.196892	0.132337	0.11899	0.0929938	0.109934	0.095852	0.102646	0.14122	0.105573	0.0939471	0.123567	0.113767	0.126034	0.138168	Striatum		r_lateral_globus_pallidus - [g/ml{SUVbw}]
		Striatum		r_outer_portion_of_the_medial_globus_pallidus - [g/ml{SUVbw}]																								Striatum		r_outer_portion_of_the_medial_globus_pallidus - [g/ml{SUVbw}]
		Nucleus Accumbens		l_nucleus_accumbens - [g/ml{SUVbw}]	0.246449	0.169412	0.235954	0.171423	0.269036	0.258201	0.136253	0.351588	0.18309	0.212484	0.230807	0.160969	0.175889	0.14984	0.133964	0.172215	0.181545	0.178185	0.211776	0.200255	0.251166	0.241816	0.197156	Nucleus Accumbens		l_nucleus_accumbens - [g/ml{SUVbw}]	0.506756	0.76497	0.44123	0.535779	0.536365	0.537348	0.441222	0.456401	0.446374	0.449127	0.394933	0.362427	0.371456	0.335687	0.318617	0.322309	0.333193	0.341498	0.374406
		Nucleus Accumbens		r_nucleus_accumbens - [g/ml{SUVbw}]	0.503263	0.204595	0.392696	0.238391	0.50428	0.297203	0.172252	0.280419	0.215595	0.167438	0.16123	0.208882	0.145585	0.154589	0.146557	0.179988	0.161558	0.19126	0.179321	0.205808	0.199895	0.203904	0.192863	Nucleus Accumbens		r_nucleus_accumbens - [g/ml{SUVbw}]	0.773278	0.574296	0.537858	0.550723	0.588676	0.552137	0.573685	0.469099	0.464781	0.49885	0.503054	0.489411	0.417739	0.444695	0.400806	0.412694	0.420252	0.427483	0.461824
				Mean	1	2	3	4	5	6	7	8	9	10	11	12	13	14	15	16	17	18	19	20	21	22	23				1	2	3	4	5	6	7	8	9	10	11	12	13	14	15	16	17	18	19
				[seconds]	15	45	90	150	210	300	420	540	660	780	960	1200	1440	1680	2100	2700	3300	3900	4500	5100	5700	6300	6900			[seconds]	15	45	90	150	210	300	420	540	660	780	960	1200	1440	1680	2100	2700	3300	3900	4500
					0.25	0.75	1.5	2.5	3.5	5	7	9	11	13	16	20	24	28	35	45	55	65	75	85	95	105	120	115		min	0.25	0.75	1.5	2.5	3.5	5	7	9	11	13	16	20	24	28	35	45	55	65	75
				Hippocampus	0.369782	0.312028	0.258197	0.30678	0.270847	0.240609	0.248455	0.222597	0.220192	0.191411	0.195775	0.165256	0.15991	0.148006	0.160106	0.142908	0.148362	0.153706	0.162202	0.164868	0.171871	0.173637	0.180152			Hippocampus	0.45608	0.444471	0.468433	0.490895	0.438026	0.448774	0.440863	0.417065	0.427652	0.40602	0.373418	0.364358	0.339902	0.329542	0.29359	0.278624	0.278921	0.286819	0.303348
				Hypothalamus	0.31534	0.303521	0.29571	0.310598	0.411275	0.270385	0.240425	0.233496	0.253015	0.204628	0.228282	0.152238	0.160388	0.182377	0.152778	0.172607	0.144885	0.160306	0.174747	0.166341	0.16551	0.184081	0.175792			Hypothalamus	1.20878	0.888993	0.864161	0.668828	0.882993	0.753888	0.716806	0.65203	0.656986	0.641048	0.615812	0.62815	0.583489	0.484778	0.481445	0.451039	0.426945	0.45947	0.47105
				Frontal Cortex	0.268112	0.291432	0.240397	0.242149	0.237802	0.229753	0.214132	0.218661	0.20174	0.197047	0.188545	0.18532	0.181028	0.184929	0.192034	0.197392	0.21107	0.230505	0.24571	0.256816	0.267777	0.280814	0.286446			Frontal Cortex	0.431243	0.399254	0.385225	0.357742	0.370236	0.341046	0.344139	0.336673	0.325295	0.317483	0.303227	0.286526	0.276931	0.259771	0.246458	0.231607	0.242055	0.248007	0.271298
				Striatum	0.222206	0.242754	0.238659	0.191408	0.136304	0.202447	0.14846	0.163528	0.17079	0.169604	0.142549	0.123457	0.120784	0.106113	0.111638	0.113554	0.113745	0.105672	0.104019	0.127409	0.124999	0.11977	0.116016			Striatum	0.606742	0.456316	0.398817	0.3986	0.377603	0.363833	0.344923	0.329847	0.31283	0.29364	0.291346	0.275592	0.255289	0.236363	0.204151	0.202401	0.203815	0.218713	0.218166
				Nucleus Accumbens	0.374856	0.187003	0.314325	0.204907	0.386658	0.277702	0.154253	0.316003	0.199342	0.189961	0.196018	0.184926	0.160737	0.152215	0.140261	0.176101	0.171552	0.184723	0.195549	0.203032	0.225531	0.22286	0.19501			Nucleus Accumbens	0.640017	0.669633	0.489544	0.543251	0.562521	0.544742	0.507453	0.46275	0.455578	0.473988	0.448993	0.425919	0.394598	0.390191	0.359711	0.367502	0.376722	0.38449	0.418115
				Hippocampus_L	0.350601	0.276203	0.257915	0.317031	0.270721	0.203377	0.223222	0.219955	0.192951	0.197742	0.180194	0.158184	0.156414	0.13254	0.160444	0.145306	0.146949	0.155621	0.154321	0.172129	0.165294	0.18238	0.169829			Hippocampus_L	0.348274	0.34966	0.370532	0.397152	0.364408	0.367034	0.361928	0.319465	0.347753	0.312726	0.310254	0.30473	0.268834	0.269391	0.239558	0.22581	0.224396	0.230564	0.247621
				Hypothalamus_L	0.310805	0.285469	0.317027	0.249307	0.440199	0.26419	0.210041	0.206633	0.234008	0.180691	0.217209	0.131373	0.14235	0.174354	0.156122	0.174701	0.1415	0.143908	0.171897	0.159419	0.165092	0.181179	0.174019			Hypothalamus_L	1.22752	0.847028	0.800464	0.658975	0.869521	0.728914	0.670204	0.60369	0.62562	0.608083	0.575359	0.607904	0.536073	0.474038	0.446779	0.409285	0.397563	0.424242	0.441164
				Frontal Cortex_L	0.253756	0.271256	0.225815	0.209293	0.222692	0.214703	0.218967	0.210038	0.17779	0.190723	0.186695	0.179644	0.179011	0.183011	0.198352	0.201747	0.222878	0.24236	0.263133	0.272814	0.294808	0.297016	0.309818			Frontal Cortex_L	0.396578	0.415826	0.374451	0.361308	0.392553	0.328184	0.344198	0.339493	0.328852	0.328478	0.312288	0.292287	0.282292	0.268259	0.256854	0.245184	0.257986	0.257642	0.27963
				Striatum_L	0.183709	0.210829	0.265148	0.205561	0.139861	0.190959	0.163226	0.175435	0.162727	0.162858	0.147844	0.129294	0.135145	0.0950737	0.118799	0.121679	0.104518	0.102765	0.104368	0.126969	0.13128	0.110411	0.106472			Striatum_L	0.559391	0.483425	0.3999	0.377414	0.421264	0.393927	0.344287	0.339675	0.319017	0.308948	0.308995	0.272503	0.278264	0.243029	0.208834	0.213142	0.217494	0.234617	0.230608
				Nucleus Accumbens_L	0.246449	0.169412	0.235954	0.171423	0.269036	0.258201	0.136253	0.351588	0.18309	0.212484	0.230807	0.160969	0.175889	0.14984	0.133964	0.172215	0.181545	0.178185	0.211776	0.200255	0.251166	0.241816	0.197156			Nucleus Accumbens_L	0.506756	0.76497	0.44123	0.535779	0.536365	0.537348	0.441222	0.456401	0.446374	0.449127	0.394933	0.362427	0.371456	0.335687	0.318617	0.322309	0.333193	0.341498	0.374406
				Hippocampus_R	0.388964	0.347853	0.258479	0.296529	0.270974	0.277841	0.273688	0.225238	0.247433	0.185081	0.211356	0.172327	0.163405	0.163472	0.159767	0.140511	0.149776	0.151792	0.170082	0.157607	0.178448	0.164894	0.190475			Hippocampus_R	0.563887	0.539281	0.566335	0.584637	0.511644	0.530514	0.519798	0.514666	0.50755	0.499314	0.436583	0.423987	0.41097	0.389693	0.347623	0.331437	0.333446	0.343074	0.359075
				Hypothalamus_R	0.319875	0.321573	0.274393	0.371889	0.382352	0.276581	0.27081	0.260358	0.272022	0.228565	0.239355	0.173102	0.178426	0.190401	0.149434	0.170513	0.14827	0.176704	0.177598	0.173263	0.165929	0.186984	0.177565			Hypothalamus_R	1.19004	0.930959	0.927859	0.678682	0.896464	0.778863	0.763409	0.70037	0.688352	0.674014	0.656266	0.648395	0.630905	0.495518	0.51611	0.492793	0.456326	0.494698	0.500935
				Frontal Cortex_R	0.286057	0.316652	0.258626	0.283218	0.25669	0.248566	0.208088	0.229439	0.231677	0.204952	0.190856	0.192415	0.183549	0.187325	0.184137	0.191948	0.196309	0.215686	0.22393	0.236817	0.233987	0.260563	0.257232			Frontal Cortex_R	0.474573	0.37854	0.398692	0.353285	0.342339	0.357123	0.344065	0.333147	0.320848	0.303739	0.2919	0.279326	0.270231	0.24916	0.233463	0.214637	0.222141	0.235963	0.260884
				Striatum_R	0.279951	0.290642	0.198926	0.170179	0.130967	0.219679	0.12631	0.145666	0.182885	0.179724	0.134606	0.114702	0.0992425	0.122672	0.100897	0.101367	0.127586	0.110033	0.103494	0.12807	0.115577	0.133809	0.130333			Striatum_R	0.654092	0.429207	0.397734	0.419786	0.333941	0.333739	0.345559	0.320019	0.306643	0.278333	0.273697	0.278681	0.232313	0.229696	0.199467	0.191661	0.190136	0.202808	0.205725
				Nucleus Accumbens_R	0.503263	0.204595	0.392696	0.238391	0.50428	0.297203	0.172252	0.280419	0.215595	0.167438	0.16123	0.208882	0.145585	0.154589	0.146557	0.179988	0.161558	0.19126	0.179321	0.205808	0.199895	0.203904	0.192863			Nucleus Accumbens_R	0.773278	0.574296	0.537858	0.550723	0.588676	0.552137	0.573685	0.469099	0.464781	0.49885	0.503054	0.489411	0.417739	0.444695	0.400806	0.412694	0.420252	0.427483	0.461824
				SD	1	2	3	4	5	6	7	8	9	10	11	12	13	14	15	16	17	18	19	20	21	22	23				1	2	3	4	5	6	7	8	9	10	11	12	13	14	15	16	17	18	19
				[seconds]	15	45	90	150	210	300	420	540	660	780	960	1200	1440	1680	2100	2700	3300	3900	4500	5100	5700	6300	6900			[seconds]	15	45	90	150	210	300	420	540	660	780	960	1200	1440	1680	2100	2700	3300	3900	4500
				min	0.25	0.75	1.5	2.5	3.5	5	7	9	11	13	16	20	24	28	35	45	55	65	75	85	95	105	120	115		min	0.25	0.75	1.5	2.5	3.5	5	7	9	11	13	16	20	24	28	35	45	55	65	75
				Hippocampus	0.0271271	0.0506639	0.000399058	0.014497	0.000179065	0.0526536	0.0356845	0.00373528	0.0385251	0.00895254	0.0220347	0.0100005	0.00494353	0.0218723	0.000478758	0.00339071	0.00199877	0.00270788	0.0111451	0.0102687	0.00930144	0.0123642	0.0145987			Hippocampus	0.152461	0.134082	0.138454	0.132572	0.104111	0.115598	0.111631	0.138028	0.112993	0.131938	0.0893278	0.0843277	0.100506	0.0850658	0.0764134	0.0746895	0.0771098	0.0795569	0.0788099
				Hypothalamus	0.00641354	0.0255291	0.0301467	0.0866785	0.0409044	0.0087619	0.0429706	0.0379896	0.0268799	0.0338523	0.0156596	0.029507	0.0255095	0.0113471	0.00472893	0.00296131	0.00478655	0.0231907	0.004031	0.00978925	0.000592048	0.00410475	0.00250778			Hypothalamus	0.0265033	0.0593483	0.0900817	0.0139351	0.0190514	0.0353197	0.0659061	0.0683632	0.0443579	0.0466201	0.0572102	0.0286317	0.067056	0.0151884	0.0490242	0.0590487	0.0415514	0.04982	0.0422645
				Frontal Cortex	0.0756803	0.0879514	0.0557156	0.0467344	0.042634	0.0352915	0.0170818	0.0230449	0.0419124	0.0190194	0.0221721	0.025978	0.0189547	0.0203044	0.0199149	0.00951899	0.0211392	0.0169649	0.0274887	0.0290968	0.0372282	0.0304129	0.0448671			Frontal Cortex	0.107742	0.0855114	0.0819354	0.0560497	0.085682	0.0638012	0.0634427	0.0580842	0.0580064	0.0537969	0.0475554	0.0514888	0.0519406	0.0481231	0.0401831	0.0415204	0.0471439	0.0450698	0.0556093
				Striatum	0.0676859	0.117743	0.0644997	0.020718	0.055242	0.0289211	0.0262434	0.0189773	0.0371476	0.0231165	0.0082793	0.0127777	0.0390203	0.0213568	0.0141449	0.0119425	0.0188598	0.0149625	0.0172487	0.00630078	0.0124261	0.0205068	0.0300661			Striatum	0.0669637	0.038338	0.0015318	0.0299616	0.0617462	0.0425597	0.000899465	0.0138984	0.00875	0.0216484	0.0249594	0.00436828	0.0324925	0.00942792	0.00662396	0.0151897	0.0193449	0.0224918	0.0175952
				Nucleus Accumbens	0.181595	0.0248781	0.110833	0.0473536	0.166343	0.0275786	0.0254547	0.0503246	0.0229848	0.0318518	0.0491984	0.0338791	0.0214279	0.00335796	0.00890446	0.00549587	0.0141326	0.00924521	0.022949	0.003927	0.0362545	0.0268082	0.00303541			Nucleus Accumbens	0.188459	0.134826	0.0683264	0.0105674	0.0369894	0.0104569	0.0936658	0.00897886	0.0130155	0.0351596	0.0764531	0.0897909	0.0327271	0.0770806	0.0581167	0.0639116	0.0615598	0.0608006	0.0618138
				Hippocampus_L																										Hippocampus_L
				Hypothalamus_L																										Hypothalamus_L
				Frontal Cortex_L	0.0880896	0.0905146	0.0721527	0.0311557	0.0545141	0.0408289	0.0207873	0.0257426	0.0292127	0.0215547	0.0240329	0.0347318	0.0213434	0.0274838	0.0247089	0.00812659	0.0215348	0.00631849	0.0204979	0.0270109	0.0215084	0.024947	0.0418041			Frontal Cortex_L	0.0708153	0.09058	0.0530039	0.0541263	0.0961791	0.0570479	0.0717306	0.0654813	0.0520927	0.054854	0.0448726	0.0520888	0.0502718	0.0512287	0.0341788	0.0351178	0.0421044	0.0403269	0.0468477
				Striatum_L	0.0591137	0.0737745	0.070021	0.00624238	0.0456443	0.0151544	0.0220593	0.0137212	0.0181517	0.0245627	0.00517704	0.0134315	0.0472515	0.0171165	0.0135062	0.00600532	0.0143603	0.0199037	0.0224374	0.00764185	0.0125529	0.0212638	0.0374826			Striatum_L
				Nucleus Accumbens_L																										Nucleus Accumbens_L
				Hippocampus_R																										Hippocampus_R
				Hypothalamus_R																										Hypothalamus_R
				Frontal Cortex_R	0.0644523	0.0904299	0.0232188	0.0219549	0.00534215	0.0157877	0.0106899	0.01593	0.0373583	0.0139709	0.0229783	0.00838989	0.018315	0.0088576	0.00969036	0.00907995	0.00709952	0.0136825	0.0177878	0.0180283	0.0184082	0.0255424	0.031459			Frontal Cortex_R	0.140581	0.0867742	0.117138	0.0665104	0.0733172	0.076781	0.0622326	0.0570073	0.0728491	0.057029	0.0551184	0.0576844	0.0609653	0.049053	0.048404	0.0475567	0.0511015	0.0538541	0.0711323
				Striatum_R	0.0148809	0.192158	0.0396545	0.011691	0.0891346	0.0435495	0.0120956	0.000741243	0.0661303	0.0242794	0.00320948	0.00606404	0.00883706	0.0180142	0.0071347	0.0018079	0.0192802	0.00630804	0.0135011	0.00636771	0.00255974	0.0109945	0.0110805			Striatum_R
				Nucleus Accumbens_R																										Nucleus Accumbens_R
[truncated: 5 more columns]
