# Supplementary material for: Lipocalin-2 is an anorexigenic signal in primates
Source: eLife. 2020 Nov 24;9:e58949. doi: 10.7554/eLife.58949 (PMC7685704; doi:10.7554/eLife.58949)
Supplement: Figure 3—source data 1. [file elife-58949-fig3-data1.xlsx]

## Sheet: Cumulative (from %)
Week	Date	ID: 1126	ID: 1869	ID: 2065	ID: 1285	ID: 1951	ID: 2079
			Saline			LCN2			days	Saline 1	Saline 2	Saline 3	LCN2 1	LCN2 2	LCN2 3			Saline 1	Saline 2	Saline 3	Lcn2 1	LCN2 2	Lcn2 3	ttest	time (days)	Saline	LCN2	Sem S	Sem L
0_PreBase	43283								0	0	0	0	0	0	0		0	0	0	0	0	0	0		0	0	0	0	0
	43284	0.2389	0.2612	0.3064	0.3852	0.6878	0.5		1	0.5861	0.72245	0.4915	0.5759	0.53175	0.59525		1	0.5861	0.72245	0.4915	0.5759	0.53175	0.59525	0.666004	1	0.600017	0.567633	0.0670317	0.0187911
	43285	0.2111	0.4735	0.2426	0.2926	0.4195	0.3048		2	0.4648	0.512933	0.441133	0.477767	0.587	0.547633		2	1.0509	1.23538	0.932633	1.05367	1.11875	1.14288	0.74462	2	1.07297	1.1051	0.0880904	0.0266436
	43286	0.5444	0.5796	0.4723	0.6185	0.6683	0.6		3	0.4833	0.5728	0.404267	0.460467	0.4927	0.457167		3	1.5342	1.80818	1.3369	1.51413	1.61145	1.60005	0.917475	3	1.55976	1.57521	0.136647	0.0307157
									4	0.566667	0.6313	0.503533	0.6358	0.585367	0.517467		4	2.10087	2.43948	1.84043	2.14993	2.19682	2.11752	0.881323	4	2.12693	2.15476	0.173421	0.0230186
									5	0.5139	0.62245	0.54465	0.49075	0.52195	0.40715		5	2.61477	3.06193	2.38508	2.64068	2.71877	2.52467	0.788583	5	2.68726	2.62804	0.198723	0.0563874
A_Base1a	43290	0.4778	0.6327	0.4213	0.437	0.4976	0.5286
	43291	0.5167	0.5306	0.3574	0.5667	0.6049	0.3048
	43292	0.5444	0.6327	0.5064	0.5444	0.5854	0.5381
	43293	0.5667	0.5878	0.5404	0.5259	0.5024	0.6524
	43294	0.4167	0.4939	0.4723	0.4074	0.5659	0.2667
A_Base1b	43297	0.6944	0.8122	0.5617	0.7148	0.5659	0.6619
	43298	0.6111	0.6449	0.5106	0.5037	0.4878	0.6048
	43299	0.6944	0.6122	0.4638	0.5444	0.4732	0.5286
	43300	0.5889	0.7265	0.4979	0.763	0.5854	0.3		ID: 1126	ID: 1869	ID: 2065	ID: 1285	ID: 1951	ID: 2079
	43301	0.6111	0.751	0.617	0.5741	0.478	0.5476		Saline 1	Saline 2	Saline 3	LCN2 1	LCN2 2	LCN2 3	week 1	Saline	LCN2	SEM S	SEM L	ttest
									0	0	0	0	0	0	0	0	0	0	0
B_Test1	43304	0.7111	0.6367	0.5787	0.7481	0.7122	0.6762	d1	0.7111	0.6367	0.5787	0.7481	0.7122	0.6762	1	0.642167	0.712167	0.0383182	0.0207557	0.183483
	43305	0.5556	0.6327	0.4298	0.3852	0.3951	0.4667	d2	1.2667	1.2694	1.0085	1.1333	1.1073	1.1429	2	1.18153	1.12783	0.0865202	0.0106341	0.571203
	43306	0.5167	0.5878	0.4085	0.5333	0.3902	0.4333	d3	1.7834	1.8572	1.417	1.6666	1.4975	1.5762	3	1.68587	1.5801	0.136111	0.0488539	0.505088
	43307	0.4444	0.5102	0.3872	0.3852	0.2829	0.2714	d4	2.2278	2.3674	1.8042	2.0518	1.7804	1.8476	4	2.13313	1.89327	0.169332	0.0816059	0.270985
	43308	0.5389	0.4776	0.417	0.4741	0.3415	0.1762	d5	2.7667	2.845	2.2212	2.5259	2.1219	2.0238	5	2.61097	2.22387	0.19619	0.153649	0.19529
		0	0	0	0	0	0		Saline 1	Saline 2	Saline 3	LCN2 1	LCN2 2	LCN2 3		Saline	LCN2	SEM S	SEM L	ttest
B_Baseline	43318	0.755556	0.763265	0.668085	0.796296	0.409756	0.780952		0	0	0	0	0	0	0	0	0	0	0
	43319	0.722222	0.702041	0.570213	0.448148	0.468293	0.504762		0.755556	0.763265	0.668085	0.796296	0.409756	0.780952	1	0.728969	0.662335	0.030523	0.126367	0.635263
	43320	0.672222	0.542857	0.587234	0.507407	0.409756	0.52381		1.47778	1.46531	1.2383	1.24444	0.878049	1.28571	2	1.39379	1.13607	0.0778313	0.129559	0.163355
	43321	0.7	0.677551	0.502128	0.581481	0.209756	0.428571		2.15	2.00816	1.82553	1.75185	1.2878	1.80952	3	1.99457	1.61639	0.0939123	0.165136	0.117361
	43322	0.683333	0.763265	0.67234	0.666667	0.419512	0.557143		2.85	2.68571	2.32766	2.33333	1.49756	2.2381	4	2.62112	2.023	0.154206	0.264152	0.122183
									3.53333	3.44898	3	3	1.91707	2.79524	5	3.32744	2.57077	0.16552	0.332151	0.111077
D_Test2	43325	0.805556	0.620408	0.680851	0.525926	0.497561	0.528571		LCN2 1	LCN2 2	LCN2 3	Saline 1	Saline 2	Saline 3
	43326	0.633333	0.567347	0.548936	0.555556	0.439024	0.504762		0	0	0	0	0	0	week 2	Saline	LCN2	SEM S	SEM L
	43327	0.672222	0.191837	0.502128	0.507407	0.434146	0.442857		0.805556	0.620408	0.680851	0.525926	0.497561	0.528571	0	0	0	0	0
	43328	0.455556	0.240816	0.344681	0.474074	0.42439	0.247619		1.43889	1.18776	1.22979	1.08148	0.936585	1.03333	1	0.517353	0.702272	0.00992532	0.05451
	43329	0.561111	0.457143	0.455319	0.381481	0.419512	0.295238		2.11111	1.37959	1.73191	1.58889	1.37073	1.47619	2	1.01713	1.28548	0.042605	0.0776596
									2.56667	1.62041	2.0766	2.06296	1.79512	1.72381	3	1.4786	1.74087	0.0629881	0.211219
									3.12778	2.07755	2.53191	2.44444	2.21463	2.01905	4	1.86063	2.08789	0.103239	0.27322
															5	2.22604	2.57908	0.122934	0.30409
									COMBINED TREATMENT WEEKS
									Saline 1	Saline 2	Saline 3	Saline 4	Saline 5	Saline 6	Saline	Sem S		days	Saline	LCN2	SEM S	SEM L
									0	0	0	0	0	0	0	0		0	0	0	0	0
									0.7111	0.6367	0.5787	0.525926	0.497561	0.528571	0.57976	0.0330497		1	0.57976	0.707219	0.0330497	0.0261787
									1.2667	1.2694	1.0085	1.08148	0.936585	1.03333	1.09933	0.0566706		2	1.09933	1.20666	0.0566706	0.0497132
									1.7834	1.8572	1.417	1.58889	1.37073	1.47619	1.58224	0.0815269		3	1.58224	1.66049	0.0815269	0.103404
									2.2278	2.3674	1.8042	2.06296	1.79512	1.72381	1.99688	0.107607		4	1.99688	1.99058	0.107607	0.134743
									2.7667	2.845	2.2212	2.44444	2.21463	2.01905	2.4185	0.134644		5	2.4185	2.40147	0.134644	0.171827
									LCN2 1	LCN2 2	LCN2 3	LCN2 4	LCN2 5	LCN2 6	LCN2	Sem L	ttest
									0	0	0	0	0	0	0	0
									0.7481	0.7122	0.6762	0.805556	0.620408	0.680851	0.707219	0.0261787	0.0128272
									1.1333	1.1073	1.1429	1.43889	1.18776	1.22979	1.20666	0.0497132	0.184994
									1.6666	1.4975	1.5762	2.11111	1.37959	1.73191	1.66049	0.103404	0.565538
									2.0518	1.7804	1.8476	2.56667	1.62041	2.0766	1.99058	0.134743	0.971557
									2.5259	2.1219	2.0238	3.12778	2.07755	2.53191	2.40147	0.171827	0.939355

## Sheet: Cumulative (from grams)
			Saline			LCN2
		1126	1285	1869	1951	2065	2079		days	Saline 1	Saline 2	Saline 3	LCN2 1	LCN2 2	LCN2 3			Saline 1	Saline 2	Saline 3	Lcn2 1	LCN2 2	Lcn2 3	ttest	time (days)	Saline	LCN2	Sem S	Sem L
Pre-base	2018-07-03	43	104	64	141	72	105		0	0	0	0	0	0	0		0	0	0	0	0	0	0		0	0	0	0	0
	2018-07-04	38	79	116	86	57	64		1	105.5	155.5	177	109	115.5	125		1	105.5	155.5	177	109	115.5	125	0.245291	1	146	116.5	21.1798	4.64579
	2018-07-05	98	167	142	137	111	126		2	82	131	117.333	121.667	92	98.6667		2	187.5	286.5	294.333	230.667	207.5	223.667	0.368519	2	256.111	220.611	34.38	6.85993
Indiv aver		59.6667	116.667	107.333	121.333	80	98.3333		3	87	124.333	140.333	101	95	96		3	274.5	410.833	434.667	331.667	302.5	319.667	0.335216	3	373.333	317.944	49.8933	8.46361
Group average		94.5556			99.8889				4	102	171.667	154.667	120	118.333	108.667		4	376.5	582.5	589.333	451.667	420.833	428.333	0.306569	4	516.111	433.611	69.8334	9.28376
Group sem		17.6513			11.9572				5	92.5	132.5	152.5	107	128	85.5		5	469	715	741.833	558.667	548.833	513.833	0.312387	5	641.944	540.444	86.8185	13.605
ttest		0.814789
Base 1	2018-07-09	86	118	155	102	99	111
	2018-07-10	93	153	130	124	84	64
	2018-07-11	98	147	155	120	119	113
	2018-07-12	102	142	144	103	127	137
	2018-07-13	75	110	121	116	111	56
Indiv aver		90.8	134	141	113	108	96.2
Group average		121.933			105.733
Group sem		15.6973			4.98041
ttest		0.380956
Base 2	2018-07-16	125	193	199	116	132	139
	2018-07-17	110	136	158	100	120	127
	2018-07-18	125	147	150	97	109	111
	2018-07-19	106	206	178	120	117	63
	2018-07-20	110	155	184	98	145	115
Indiv aver		115.2	167.4	173.8	106.2	124.6	111
Group average		152.133			113.933
Group sem		18.5589			5.51039
ttest		0.119733
Average of baselines		122.874			106.519
SEM of baselines		12.0134			4.54531					Saline 1	Saline 2	Saline 3	Lcn2 1	LCN2 2	Lcn2 3		ttest	time (days)	Saline	LCN2	Sem S	Sem L
ttest of baselines		82							0	0	0	0	0	0	0		#DIV/0!	0	0	0	0	0
Treat 1	2018-07-23	128	202	156	146	136	142		1	128	202	156	146	136	142		0.396145	1	162	141.333	21.5716	2.90593
	2018-07-24	100	104	155	81	101	98		2	228	306	311	227	237	240		0.158568	2	281.667	234.667	26.8721	3.92994
	2018-07-25	93	144	144	80	96	91		3	321	450	455	307	333	331		0.129656	3	408.667	323.667	43.8571	8.35331
	2018-07-26	80	104	125	58	91	57		4	401	554	580	365	424	388		0.110606	4	511.667	392.333	55.84	17.1691
	2018-07-27	97	128	117	70	98	37		5	498	682	697	435	522	425		0.0808115	5	625.667	460.667	63.98	30.8022
Indiv aver		92.5	120	135.25	72.25	96.5	70.75																							COMBINED TREATMENTS CUMULATIVE
Group average		115.917			79.8333
Group sem		12.5086			8.34458																										Saline 1	Saline 2	Saline 3	Saline 4	Saline 5	Saline 6	Saline	Sem S		days	Saline	LCN2	SEM S	SEM L
ttest		0.0743796								Saline 1	Saline 2	Saline 3	Lcn2 1	LCN2 2	Lcn2 3		ttest	time (days)	Saline	LCN2	Sem S	Sem L								0	0	0	0	0	0	0	0	0		0	0	0	0	0
Base after washout	2018-08-06	136	215	187	84	157	164		0	0	0	0	0	0	0		#DIV/0!	0	0	0	0	0								1	130	121	172	90	129	106	124.667	11.3304		1	124.667	123.167	11.3304	8.57289
	2018-08-07	130	121	172	96	134	106		1	130	121	172	96	134	106		0.209258	1	141	112	15.7162	11.3725								2	251	258	305	179	247	199	239.833	18.3674		2	239.833	229.333	18.3674	17.9512
	2018-08-08	121	137	133	84	138	110		2	251	258	305	180	272	216		0.199343	2	271.333	222.667	16.9542	26.7665								3	377	415	471	266	328	251	351.333	35.0834		3	351.333	316	35.0834	31.1277
	2018-08-09	126	157	166	43	118	90		3	377	415	471	223	390	306		0.107267	3	421	306.333	27.3008	48.209								4	500	595	658	352	435	313	475.5	55.2224		4	475.5	428.833	55.2224	37.3376
	2018-08-10	123	180	187	86	158	117		4	500	595	658	309	548	423		0.129951	4	584.333	426.667	45.9214	69.0177								5	627.2	757	827	440	543.75	391.25	597.7	70.5282		5	597.7	538.875	70.5282	46.9293
Indiv aver		127.2	162	169	78.6	141	117.4		5	627.2	757	827	387.6	689	540.4		0.131936	5	737.067	539	58.5321	87.0095
Group average		152.733			112.333																									0	Lcn2 1	LCN2 2	Lcn2 3	LCN2 1	LCN2 2	LCN2 3	LCN2	Sem L	ttest
Group sem		12.9256			18.1906																									1	0	0	0	0	0	0	0	0
ttest		0.144476																												2	96	134	106	114	150	139	123.167	8.57289	0.918009
	CROSSOVER	1126	1285	1869	1951	2065	2079			LCN2 1	LCN2 2	LCN2 3	Saline 1	Saline 2	Saline 3		ttest	time (days)	LCN2	Saline	Sem L	Sem S								3	180	272	216	235	287	186	229.333	17.9512	0.691279
	2018-08-13	145	142	152	102	160	111		0	0	0	0	0	0	0		#DIV/0!	0	0	0	0	0								4	223	390	306	317	415	245	316	31.1277	0.468607
	2018-08-14	114	150	139	90	129	106		1	114	150	139	90	129	106		0.169667	1	134.333	108.333	10.651	11.3186								5	309	548	423	418	518	357	428.833	37.3376	0.499848
Treat 2	2018-08-15	121	137	47	89	118	93		2	235	287	186	179	247	199		0.478855	2	236	208.333	29.1605	20.177									387.6	689	540.4	522.5	647.5	446.25	538.875	46.9293	0.503251
	2018-08-16	82	128	59	87	81	52		3	317	415	245	266	328	251		0.465599	3	325.667	281.667	49.2657	23.5679
	2018-08-17	101	103	112	86	107	62		4	418	518	357	352	435	313		0.337768	4	431	366.667	46.929	35.9738
Indiv aver		104.5	129.5	89.25	88	108.75	78.25		5	522.5	647.5	446.25	440	543.75	391.25		0.337768	5	538.75	458.333	58.6613	44.9672
Group average		107.75			91.6667
Group sem		11.7323			8.99344
ttest		0.337768
																							PERCENT OF BASELINE
COMBINE TREATMENT WEEKS
																								Baseline	Treatment 1	Baseline a.w.	Treatment 2			Baseline	Treatment 1	Baseline	Treatment 2
BASELINE	1126	1285	1869	1951	2065	2079																	Saline	122.874	115.917	112.333	91.6667		Saline	1	0.943378	1	0.816024
Prebase	59.6667	116.667	107.333	121.333	80	98.3333																	LCN2	106.519	79.8333	152.733	107.75		LCN2	1	0.749478	1	0.705478
Baseline 1	90.8	134	141	113	108	96.2																	S-SEM	17.1637	12.5086	18.1906	8.99344
Baseline 2	115.2	167.4	173.8	106.2	124.6	111																	L-SEM	3.56181	8.34458	12.9256	11.7323
	88.5556	139.356	140.711	113.511	104.2	101.844
Average		122.874			106.519
SEM		17.1637			3.56181																		TREATMENT WEEK 1
											Treatment week 1												Percent of baseline		BASELINE					TREATMENT							Baseline	Treatment
BASELINE AFTER WASHOUT	1126	1285	1869	1951	2065	2079		Subject	Baseline 1	Baseline 2	Baseline 3	Baseline M	Base SEM	Treat 1	Treat 2		Treat 3	Treat mean	Treat SEM	ttest			Subject	1	2	3	Baseline M	Base SEM	1	2	3	Baseline M	Base SEM	ttest		Saline	1	0.943378
	127.2	162	169	78.6	141	117.4		Saline	88.5556	139.356	140.711	122.874	17.1637	92.5	120		135.25	115.917	12.5086	#N/A	-0.311287		Saline	0.720702	1.13413	1.14517	1	0.139685	0.752803	0.97661	1.10072	0.943378	0.1018	0.205681		LCN2	1	0.749478
		152.733			112.333			LCN2	113.511	104.2	101.844	106.519	3.56181	72.25	96.5		70.75	79.8333	8.34458	#N/A			LCN2	1.06565	0.978234	0.95612	1	0.0334384	0.678286	0.905946	0.664204	0.749478	0.0783392			SEM SALINE	0.139685	0.1018
		12.9256			18.1906								unpaired ttest	0.0743796																						SEM LCN2	0.0334384	0.0783392
SALINE	1126	1285	1869	1951	2065	2079
	92.5	120	135.25	88	108.75	78.25																	TREATMENT WEEK 2
Average		115.917			91.6667						Treatment week 2												Percent of baseline		BASELINE					TREATMENT							Baseline	Treatment
SEM		12.5086			8.99344			Subject	Baseline 1	Baseline 2	Baseline 3	Baseline M	Base SEM	Treat 1	Treat 2		Treat 3	Treat mean	Treat SEM	ttest			Subject	1	2	3	Baseline M	Base SEM	1	2	3	Baseline M	Base SEM			Saline	1	0.816024
ttest								Saline	78.6	141	117.4	112.333	12.9256	88	108.75		78.25	91.6667	8.99344	#N/A	0.175455		Saline	0.699703	1.25519	1.0451	1	0.161934	0.783383	0.968101	0.696588	0.816024	0.0800603			LCN2	1	0.705478
	1126	1285	1869	1951	2065	2079		LCN2	127.2	162	169	152.733	18.1906	104.5	129.5		89.25	107.75	11.7323	#N/A			LCN2	0.832824	1.06067	1.1065	1	0.0846285	0.684199	0.847883	0.584352	0.705478	0.0768153			SEM SALINE	0.161934	0.0800603
LCN2	104.5	129.5	89.25	72.25	96.5	70.75							unpaired ttest	0.337768																						SEM LCN2	0.0846285	0.0768153
Average		107.75			79.8333																		COMBINATION OF TWO WEEKS OF TREATMENT (% BASELINE)
SEM		11.7323			8.34458																				BEFORE TREATMENT						TREATMENT				ttest
ttest																						SALINE	0.720702	1.13413	1.14517	0.699703	1.25519	1.0451	0.752803	0.97661	1.10072	0.783383	0.968101	0.696588	0.151675
																						LCN2	1.06565	0.978234	0.95612	0.832824	1.06067	1.1065	0.678286	0.905946	0.664204	0.684199	0.847883	0.584352	0.00968949
																						MEAN SALINE	1	0.0956396					0.879701	0.064541					0.0919259
																						MEAN LCN2	1	0.0406943					0.727478	0.0500432
																							Baseline	Treatment
																						Saline	1	0.879701
																						LCN2	1	0.727478
																						SEM SALINE	0.0956396	0.064541
																						SEM LCN2	0.0406943	0.0500432

## Sheet: autoradiography 
Human													Baboon
Brain Region	Total Binding	Non-Specific Binding (1 µM LCN2)	Specific Binding	Percent Specific Binding									Brain Region	Total Binding	Non-Specific Binding (1 µM LCN2)	Specific Binding	Percent Specific Binding
Hypothalamus	1132.15	986.7	145.45	12.8472									Hypothalamus	1323.93	1095.36	228.569	17.1296
PVN	1268.32	1001.04	267.28	21.0735									PVN	1392.39	1179.59	212.803	15.1536
Blank	86.86	133.78	-46.92	-54.018									Blank	29.65	25.35	4.3	8.77043
	Non-Specific Binding (1 µM LCN2)	Specific Binding												Non-Specific Binding (1 µM LCN2)	Specific Binding
Hypothalamus	986.7	145.45											Hypothalamus	1095.36	228.569
PVN	1001.04	267.28											PVN	1179.59	212.803

## Sheet: Blandine's obese
	0	30	60	120		Time (min)	0	30	60	120
	67.88	53.43	49.17	58.04		LCN2(ng/mL)	57.4067	48.2833	50.1967	45.2767
	56.43	55.48	53.92	38.51		sem	5.78549	6.19997	1.92307	6.38554
	47.91	35.94	47.5	39.28
		0.158924	0.338627	0.0532187
		0.342556	0.302459	0.231969

## Sheet: Vervet monkeys PET studies
	Figure 3, J-M	CHASE - SUV
		time (min)	l_thalamus	l_hypothalamus	r_thalamus	r_hypothalamus
		0.25	0.554402	0.590462	0.561822	0.593285
		0.75	0.449036	0.386172	0.514808	0.382784
		1.5	0.40973	0.311678	0.40482	0.385963
		2.5	0.390562	0.387254	0.438847	0.340551
		3.5	0.386345	0.438691	0.356423	0.393321
		5	0.409338	0.351867	0.379227	0.37049
		7	0.421712	0.433752	0.437842	0.407564
		9	0.336418	0.299153	0.376607	0.331269
		11	0.389304	0.328596	0.471217	0.39877
		13	0.355551	0.431906	0.321509	0.389265
		16	0.340011	0.276435	0.311725	0.284269
		20	0.276993	0.274141	0.260417	0.273713
		24	0.250088	0.217713	0.222873	0.236395
		28	0.183606	0.161661	0.168492	0.183402
		35	0.179075	0.193408	0.183565	0.211209
		45	0.163009	0.162904	0.164947	0.182344
		55	0.163617	0.174355	0.165671	0.184968
		65	0.161916	0.228927	0.154057	0.270141
		75	0.159534	0.326131	0.157713	0.427407
		85	0.177315	0.237963	0.147404	0.284493
		95	0.165208	0.208072	0.13134	0.234555
		105	0.162704	0.233149	0.136613	0.257044
		115	0.177715	0.2166	0.156258	0.268936
		NO CHASE - SUV
		time (min)	l_thalamus	l_hypothalamus	r_thalamus	r_hypothalamus
		0.25	0.714203	1.22752	0.697046	1.19004
		0.75	0.333294	0.847028	0.414794	0.930959
		1.5	0.410106	0.800464	0.418443	0.927859
		2.5	0.333777	0.658975	0.330464	0.678682
		3.5	0.389304	0.869521	0.421112	0.896464
		5	0.349958	0.728914	0.372047	0.778863
		7	0.330699	0.670204	0.357173	0.763409
		9	0.310096	0.60369	0.359203	0.70037
		11	0.314161	0.62562	0.396264	0.688352
		13	0.280134	0.608083	0.310684	0.674014
		16	0.276747	0.575359	0.308017	0.656266
		20	0.257817	0.607904	0.280017	0.648395
		24	0.229904	0.536073	0.25981	0.630905
		28	0.196407	0.474038	0.223457	0.495518
		35	0.205499	0.446779	0.222394	0.51611
		45	0.17318	0.409285	0.187854	0.492793
		55	0.161436	0.397563	0.183704	0.456326
		65	0.160175	0.424242	0.176943	0.494698
		75	0.171278	0.441164	0.187617	0.500935
		85	0.165753	0.442056	0.175483	0.489924
		95	0.181818	0.420523	0.199653	0.493579
		105	0.163547	0.448981	0.182269	0.483093
		115	0.167025	0.436422	0.179399	0.485084
