# Supplementary material for: Lipocalin-2 is an anorexigenic signal in primates
Source: eLife. 2020 Nov 24;9:e58949. doi: 10.7554/eLife.58949 (PMC7685704; doi:10.7554/eLife.58949)
Supplement: Source data 1. [file elife-58949-data1.xlsx]

## Sheet: Sheet1
	Table 1 - Study 1	ID	Origin	Height	H (m)	Weight	BMI cal	Age		GLUCOSE (raw values in mg/dL)
		AA-08	Caucasian	160	1.6	55.8	21.7969	32		Observation	ID	T0	T15	T30	T45	T60	T90	T120	T180
		EA-09	Caucasian	167.6	1.676	57.1	20.3277	28		1	AA-08	82	105	86	82	90	117	82	77
		MB-10	Caucasian	157.5	1.575	57.6	23.22	27		2	EA-09	79	78	81	76	75	71	106	75
		SY-11	Asian	157.5	1.575	51.9	20.9221	26		3	MB-10	84	93	92	91	97	92	105	84
		LT-12	Asian	167.6	1.676	59.9	21.3245	30		4	SY-11	82	87	96	73	71	89	72	69
		S-K013	Asian	155	1.55	46.3	19.2716	28		5	LT-12	83	95	97	87	89	105	124	93
		N-A014	Asian	157.5	1.575	57.6	23.22	25		6	S-K013	77	82	86	77	71	83	126	79
		G-T015	Caucasian	157.5	1.575	45.6	18.3825	29		7	N-A014	75	92	81	59	66	81	71	84
		L-S016	Caucasian	165.1	1.651	67.1	24.6166	missing		8	G-T015	84	79	71	68	72	69	71	78
		K-L017	Caucasian	160	1.6	60.3	23.5547	28		9	L-S016	80	83	96	86	83	75	122	87
		R-K018	1Caucasian	160	1.6	59	23.0469	26		10	K-L017	83	77	74	70	55	77	59	75
			mean	160.482	1.60482	56.2	21.7894	27.9		11	R-K018	70	70	68	59	60	76	58	70
			SD	4.34714	0.0434714	6.2522	1.94512	2.079			mean	79.9091	85.5455	84.3636	75.2727	75.3636	85	90.5455	79.1818
			SEM	1.31071	0.0131071	1.88511	0.586477	0.657436			SD	4.39214	10.0036	10.3467	10.7897	13.0941	14.8526	26.5494	7.26386
			N	11	11	11	11	10			SEM	1.32428	3.01621	3.11965	3.25322	3.94801	4.47823	8.00496	2.19014
											N	11	11	11	11	11	11	11	11
	Table 1 - Study 2	ID	BMI	Age
		BJ	19.6	29
		PM	19.7	27
		LM	20.8	26
		RA	23.9	27
		BM	21.8	23
		BC	19.7	25
		LE	19.2	24
		BE	20.1	22
		SM	22.5	32
		mean	20.8111	26.1111
		SD	1.59722	3.10018
		SEM	0.532407	1.03339
		N	9	9
	Table 2
	Subject ID	Response	Age	Sex	SEX#	BMI	Height_m	Weight_kg	BodyFat	BP_Dia	BP_Sys	WC	Scr GLU(mmol/L)
	1	R	52	female	1	26.33	1.62	69.1	23.4	95	129	89	98
	6	R	56	female	1	33.3	1.69	95.1	41.5	80	123	94	96
	8	R	25	female	1	24.75	1.69	70.7	17.4	71	92	80	94
	9	R	52	female	1	24.5	1.64	65.9	37.1	62	90	90	92
	13	R	23	female	1	27.18	1.66	74.9	29.9	73	106	96	90
	14	R	38	female	1	31.36	1.71	91.7	33.4	90	135	120	100
	15	R	42	female	1	27.06	1.59	68.4	28.1	80	103	89	96
	20	R	48	female	1	27.07	1.75	82.9	35.1	79	103	93	103
	25	R	58	female	1	28	1.63	74.4	36.9	81	123	95	109
	31	R	28	female	1	27.88	1.68	78.7	23.5	82	99	92	95
	32	R	21	female	1	26.51	1.64	71.3	28.5	72	112	85	88
	33	R	29	female	1	26.45	1.65	72	22.5	83	130	85	79
	35	R	26	female	1	31.67	1.49	70.3	32.2	85	106	90	90
	43	R	26	female	1	25.27	1.56	61.5	28.4	76	98	82	84
	48	R	22	female	1	30.74	1.69	87.8	22.8	77	114	104	88
		mean	36.4			27.8713	1.646	75.6467	29.38	79.0667	110.867	92.2667	93.4667
		SEM	3.51974			0.690824	0.0166132	2.51058	1.7293	2.06436	3.68506	2.51181	1.94659
		N	15			15	15	15	15	15	15	15	15
	24	R	29	male	2	29.37	1.82	97.3	26.1	79	113	100	90
	29	R	26	male	2	24.38	1.74	73.8	25.2	85	126	93	90
	34	R	25	male	2	31.32	1.88	110.7	23.3	76	105	107	94
	36	R	21	male	2	35.3	1.77	112.3	30.3	88	108	119	101
	39	R	23	male	2	24.89	1.76	77.1	16.5	78	118	93	78
	41	R	20	male	2	31.84	1.73	95.3	27.4	88	108	105	91
	42	R	21	male	2	24.82	1.72	73	19	90	102	86	78
	44	R	24	male	2	28.34	1.74	85.3	11.1	118	72	85	98
	45	R	26	male	2	23.62	1.77	74	15.3	70	102	85	87
	47	R	42	male	2	33.49	1.7	96.8	26.3	88	132	109	96
		mean	25.7			28.737	1.763	89.56	22.05	86	108.6	98.2	90.3
		SEM	2.01136			1.32427	0.01667	4.76958	1.96696	4.11231	5.16226	3.69324	2.43607
		N	10			10	10	10	10	10	10	10	10
	mixed gender R:	mean	32.12			28.2176	1.6928	81.212	26.448	81.84	109.96	94.64	92.2
		SEM	2.29086			0.614186	0.0154019	2.55191	1.36594	1.97155	2.75456	1.99272	1.4132
		N	25			25	25	25	25	25	25	25	25
	2	NR	21	female	1	24.4	1.58	60.9	28.8	89	94	80	89
	4	NR	22	female	1	34.4	1.63	91.4	37.4	84	111	115	87
	5	NR	41	female	1	30.94	1.73	92.6	37.5	86	115	117	105
	7	NR	36	female	1	28.82	1.61	74.7	18.1	99	125	85	103
	10	NR	50	female	1	35.4	1.59	90.3	25.9	86	126	154	119
	11	NR	38	female	1	34.88	1.64	93.8	28.5	71	99	120	105
	18	NR	52	female	1	29.06	1.6	74.4	39.2	74	103	84	95
	23	NR	21	female	1	23.5	1.57	57.6	32.3	68	93	98	86
	30	NR	59	female	1	26.4	1.64	71	31.9	88	114	95	81
	37	NR	24	female	1	27.98	1.66	77.1	37	76	97	99	87
	46	NR	25	female	1	33.5	1.64	90.1	31.6	70	99	106	108
	50	NR	22	female	1	33.44	1.65	90.5	33.5	118	84	96	93
	28	NR	52	female	1	27.41	1.59	69.3	35.1	74	105	103	85
		mean	35.6154			30.01	1.62538	79.5154	32.0615	83.3077	105	104	95.6154
		SEM	3.89862			1.12357	0.0118546	3.51223	1.60374	3.84705	3.49358	5.42667	3.15119
		N	13			13	13	13	13	13	13	13	13
	3	NR	27	male	2	25.57	1.76	79.2	18.1	73	108	90	96
	17	NR	27	male	2	25.23	1.74	76.4	15.7	76	115	124	96
	38	NR	25	male	2	27.02	1.76	83.7	25.6	85	98	101	95
	40	NR	31	male	2	28.3	1.86	97.9	20.4	95	138	99	103
	49	NR	21	male	2	33.47	1.83	112.1	29.8	78	102	113	88
	51	NR	23	male	2	27.07	1.77	84.8	24.3	99	62	103	82
	16	NR	49	male	2	30.25	1.69	86.4	24.1	86	128	84	101
	26	NR	26	male	2	30.35	1.86	105	29.6	74	118	110	89
	27	NR	29	male	2	25.44	1.66	70.1	15.6	90	139	77	85
		mean	28.6667			28.0778	1.77	88.4	22.5778	84	112	100.111	92.7778
		SEM	2.72845			0.931681	0.0233928	4.60989	1.81305	3.13581	7.92149	4.91722	2.39083
		N	9			9	9	9	9	9	9	9	9
	mixed gender NR:	mean	32.7727			29.2195	1.68455	83.15	28.1818	83.5909	107.864	102.409	94.4545
		SEM	2.4072			0.715204	0.0177769	2.66378	1.42982	2.35157	3.49845	3.42778	1.91555
		N	22			22	22	22	22	22	22	22	22
	Table 3 - Study 4	Subject characteristics
		Pre or Post surgery	Subj. #	AGE (y)	WT (kg)	Ht. (inches)	BMI (kg/m^2)	Glucose
		Pre	2707	21	95.8182	62	38.5516	95.3
		Pre	2710	40	96.5455	61.5	39.4784	106.067
		Pre	2716	52	103.273	62.5	40.8887	109.55
		Pre	2717	27	159.727	66	56.7112	97.25
		Pre	2718	53	126.636	64	47.8164	97.75
		Pre	2720	43	136.5	64	51.5407	117.1
		Pre	2701	30	168.955	66.5	59.0887	95.05
		Pre	2719	28	131.045	64.5	48.717	117.1
		Pre	2721	22	121.955	64.5	45.3374	83.8
		Pre	2723	36	135	67	46.5117	80.6
		Pre	2725	38	138.182	64	52.1758	102.1
		Pre	2727	34	133.182	70	42.0365	77.3
			Mean	35.3333	128.902	64.7083	47.4045	98.2472
			STD	10.5083	22.5834	2.37849	6.62255	13.1207
			SEM	3.03348	6.51925	0.68661	1.91176	3.78762
			N	12	12	12	12	12
		Pre or Post surgery	Subj. #	AGE (y)	WT (kg)	Ht. (inches)	BMI (kg/m^2)	Glucose
		Post	2707	22	52.8636	62	21.2692	80.6667
		Post	2710	40	57.5	61.5	23.5123	92.5
		Post	2716	53	68.5455	62.5	27.1392	96.45
		Post	2717	28	91.7727	66	32.584	82.3
		Post	2718	54	91.2273	64	34.4463	81.4
		Post	2720	44	98.1818	64	37.0723	94.95
		Post	2701	31	117.5	66.5	41.0934	87.85
		Post	2719	31	80.9545	64.5	30.0954	90.8
		Post	2721	23	75.7727	64.5	28.169	97.6
		Post	2723	37	65.7727	67	22.6607	64.3
		Post	2725	39	85.7727	64	32.3867	87.7
		Post	2727	35	78.5909	70	24.8059	78.2
			Mean	36.4167	80.3712	64.7083	29.6029	86.2264
			STD	10.3613	18.1663	2.37849	6.13513	9.48624
			SEM	2.99104	5.24417	0.68661	1.77106	2.73844
			N	12	12	12	12	12
